# Supplementary material for: Quantitative Approach to Quality Review of Prenatal Ultrasound Examinations: Estimated Fetal Weight and Fetal Sex
Source: Preprints.org preprint supplement (doi:10.20944/preprints202410.1973.v1), 2024-10-25
Supplement: Supplementary file 1 [file supplementary]

## Sheet: Sheet1
Exam date	Exam ID	Person Number	DOB	Exam type	Exam Status	Cardiac Activity	Assigned EDD	BPD (mm)	HC (mm)	AC (mm)	FL (mm)	Gender	Reading Physician	Sonographer	Deliv Date	BW	nbSex	Live	BWtwinB	Notes
2024-01-02	2940063	18987	1991-12-26 01:55:18	Follow up US	Finalized	Present	2024-03-25	77.1	277.6	247.2	58.7		Jennifer Jenson MD	Vicky Martinez, RDMS	2024-03-19	3270	M	Y		The sample data file is intended to help developers debug analysis scripts.
2024-01-02	3165101	1658210	1998-08-22 08:38:54	Follow up US	Finalized	Present	2024-02-05	90.4	326.2	319	66.8		William Wilson MD	Apoorva Kota, RDMS	2024-01-19	3085	M	Y		Data were "based on" real data in our analysis set.
2024-01-03	3137864	141621	1986-09-23 07:58:07	Follow up US	Finalized	Present	2024-02-23	81.5	309.1	299.7	64.8	male	Jennifer Jenson MD	Estefania Traun, RDMS	2024-02-01	2825	M	Y		But random variations were introduced to anonymize data.
2024-01-03	2936189	198910	1988-06-07 23:19:13	Comp Detailed US	Finalized	Present	2024-05-25	46.6	167.5	142.6	33.6	female	Andrea Anderson MD	Apoorva Kota, RDMS	2024-05-09	2740	F	Y		A percentage of exams were deleted, so sample N is smaller than real N.
2024-01-03	3229585	257327	1988-05-16 22:45:28	Comp Basic US	Finalized	Present	2024-02-20	77.5	284.9	267.4	59.9	female	William Wilson MD	Angelica Zunj, RDMS	2024-02-03	2205	F	Y		Exam dates - added 2 years and introduced random noise ± 3 days
2024-01-03	3118354	1010101	1992-12-19 19:28:35	Follow up US	Finalized	Present	2024-03-03	79.7	293.9	266.7	61.7	female	William Wilson MD	Tania Smith, RDMS	2024-02-16	2620	F	Y		Exam ID - fabricated
2024-01-03	2889887	1348479	1988-05-14 00:47:48	Comp Detailed US	Finalized	Present	2024-05-30	45.3	168.1	133.1	29.1	male	Andrea Anderson MD	Natalie Serano, RDMS	2024-05-31	3350	M	Y		Person number - fabricated,
2024-01-03	3181695	1846169	1990-02-04 12:04:13	Follow up US	Finalized	Present	2024-01-14	93	351.2	379.2	79		William Wilson MD	Tania Smith, RDMS	2024-01-20	4260	F	Y		DOB - added random noise (± 1 year)
2024-01-03	2824951	1946793	1991-02-04 06:46:24	Follow up US	Finalized	Present	2024-02-29	85.6	308	296.7	62.5	male	William Wilson MD	Estefania Traun, RDMS	2024-02-22	3360	M	Y		Exam status - fabricated
2024-01-04	3207709	167499	1990-03-07 10:58:07	Fetal Echo	Finalized	Present	2024-02-21	84.3	306.6	277.9	65	male	Jennifer Jenson MD	Deepa Yow, RDMS	2024-01-26	3040	M	Y		Cardiac activity - fabricated
2024-01-04	3125284	715174	2001-06-24 16:42:39	Follow up US	Finalized	Present	2024-05-01	59.4	216.9	190.4	44.7	male	Jackie Jackson MD	Tania Smith, RDMS	2024-04-13	2780	M	Y		Assigned EDD - added random noise ± 2 days
2024-01-04	3121662	755564	1990-10-25 08:05:09	Follow up US	Finalized	Present	2024-02-23	77.6	284.8	268.5	63.3	female	Jackie Jackson MD	Jessica Yuan, RDMS	2024-02-17	3200	F	Y		Biometry - added random noise ±2 mm
2024-01-04	3147577	1113322	2001-11-06 13:55:18	Follow up US	Finalized	Present	2024-02-29	79.7	293.9	273.7	60.2	male	William Wilson MD	Apoorva Kota, RDMS	2024-02-21	3250	M	Y		Physician and Sonographer Names - fabricated
2024-01-04	2922956	1370064	1991-12-05 03:07:01	Comp Detailed US	Finalized	Present	2024-06-04	42.4	153	128.1	28	male	William Wilson MD	Estefania Traun, RDMS	2024-05-27	3340	M	Y		Delivery date - added random noise ±2 days
2024-01-05	2971515	14954	1998-03-31 13:11:43	Comp Detailed US	Finalized	Present	2024-05-31	43.4	161.3	148	30.7	male	Jennifer Jenson MD	Deepa Yow, RDMS	2024-06-01	3930	M	N		Live Y=liveborn, N=stillborn
2024-01-05	3187244	56111	1987-03-09 04:49:41	Follow up US	Finalized	Present	2024-01-19	97.1	347.6	352.6	73.7		William Wilson MD	Jessica Yuan, RDMS	2024-01-09	3135	F	Y		BWtwinB is fabricated. We used other methods to identify twins
2024-01-05	2967224	279646	1993-02-10 19:35:37	Comp Detailed US	Finalized	Present	2024-05-30	46.1	164.9	141	30.1	male	Jennifer Jenson MD	Deepa Yow, RDMS	2024-05-18	2840	M	Y		Because of random noise introduced, it is expected that
2024-01-05	3097252	852903	1990-08-09 10:20:09	Comp Detailed US	Finalized	Present	2024-05-17	49	185.7	161.5	34.9	male	William Wilson MD	Natalie Serano, RDMS	2024-05-13	4300	M	Y		predicted BW will have larger errors in sample data
2024-01-05	2953392	1147959	2003-11-13 10:24:22	Follow up US	Finalized	Present	2024-03-26	76.9	289.5	248.2	53.9	male	Jennifer Jenson MD	Deepa Yow, RDMS	2025-07-25	3250	F	Y		compared to real data.
2024-01-05	3080309	1304696	1988-09-09 22:17:20	Comp Detailed US	Finalized	Present	2024-06-04	42.2	155	135	28.2	male	Jackie Jackson MD	Vicky Martinez, RDMS	2024-05-24	3380	M	Y		We assume that variable names are self-explanatory.
2024-01-05	3226886	1591541	1989-01-23 18:25:18	Follow up US	Finalized	Present	2024-03-01	75.8	283	271.3	63.1		Jackie Jackson MD	Estefania Traun, RDMS	2024-02-22	2880	F	Y		Columns from Exam date to Sonographer come from Viewpoint query.
2024-01-05	3169321	1787134	1988-02-04 00:59:03	Follow up US	Finalized	Present	2024-05-06	53.1	202.4	177.7	42.7		Jackie Jackson MD	Angelica Zunj, RDMS	2024-04-10	3090	F	Y		Columns from Deliv Date to BWtwinB are from hospital records.
2024-01-06	3155979	504160	1990-08-14 09:36:33	Comp Basic US	Finalized	Present	2024-03-04	84.7	288	275.2	63.5	male	Jennifer Jenson MD	Angelica Zunj, RDMS	2024-02-28	3370	M	Y		The person reviewing hosp records worked from a spreadsheet that
2024-01-06	3044944	650298	1989-09-14 16:28:35	Comp Detailed US	Finalized	Present	2024-06-02	43.8	163.5	125.9	28.4	female	Jackie Jackson MD	Jessica Yuan, RDMS	2024-06-01	3310	F	Y		contained only: Patient Name, DOB, and EDD. That spreadsheet
2024-01-06	3099188	1169371	1987-08-30 03:59:03	Follow up US	Finalized	Present	2024-04-13	63	238.6	211.4	49.4	male	Jackie Jackson MD	Jessica Yuan, RDMS	2024-03-28	3170	M	Y		was later merged with the Viewpoint query to create a data file
2024-01-06	3012671	1308088	1988-04-08 00:23:54	Comp Detailed US	Finalized	Present	2024-05-26	49.8	175.7	152.1	32.7	female	Jennifer Jenson MD	Deepa Yow, RDMS	2024-05-22	3210	F	Y		analogous to this one.
2024-01-06	3196937	1335807	1989-01-06 18:32:20	Follow up US	Finalized	Present	2024-02-03	82.2	320.6	341.7	69.6		Jackie Jackson MD	Tania Smith, RDMS	2024-01-28	3630	M	Y
2024-01-06	3133682	1492294	1985-09-02 15:39:22	Follow up US	Finalized	Present	2024-04-05	68.2	245.7	227.7	53	female	Jackie Jackson MD	Jessica Yuan, RDMS	2024-03-17	2870	F	Y
2024-01-06	3082548	1962104	1990-01-10 14:52:58	Comp Detailed US	Finalized	Present	2024-06-04	42.9	152.4	119.9	27.6	female	Jennifer Jenson MD	Deepa Yow, RDMS	2024-05-30	3070	F	Y
2024-01-07	3176349	1115943	1988-05-03 22:41:15	Follow up US	Finalized	Present	2024-01-26	90.9	326.5	327.6	68.4	male	William Wilson MD	Jessica Yuan, RDMS	2024-01-10	2685	M	Y	2700
2024-01-07	3129812	1209161	1987-07-05 03:46:24	Comp Basic US	Finalized	Present	2024-02-27	81	310.6	294.7	67.8	male	Jackie Jackson MD	Tania Smith, RDMS	2024-02-23	3270	M	Y
2024-01-08	3245583	1284073	1992-09-15 22:25:46	Comp Detailed US	Finalized	Present	2024-05-23	52.1	185.9	157.7	32.8	male	Jennifer Jenson MD	Jessica Yuan, RDMS	2024-05-10	3300	M	Y
2024-01-08	3075257	1344970	1996-03-19 01:45:28	Comp Detailed US	Finalized	Present	2024-06-02	48	164.1	131.5	25.5	male	William Wilson MD	Jessica Yuan, RDMS	2024-06-01	2810	M	Y
2024-01-08	3190964	1735664	1991-03-04 06:12:39	Follow up US	Finalized	Present	2024-03-04	74.6	278.3	266.3	66.8	female	William Wilson MD	Natalie Serano, RDMS	2024-03-03	3570	F	Y
2024-01-08	3153432	1745326	1998-12-17 07:56:43	Fetal Echo	Finalized	Present	2024-03-24	70.2	266.7	247.9	52.6	female	Jennifer Jenson MD	Vicky Martinez, RDMS	2024-03-19	3090	F	Y
2024-01-09	3255061	285047	1984-02-23	Follow up US	Finalized	Present	2024-03-15	77.5	285.4	266.6	62.9		Fred Fredriskson MD	Tania Smith, RDMS	2024-02-24	2590	M	Y
2024-01-09	2984353	798479	1983-11-25 03:11:15	Comp Detailed US	Finalized	Present	2024-06-05	44.6	163.2	136.3	28.3	male	Fred Fredriskson MD	Vicky Martinez, RDMS	2024-06-02	3710	M	Y
2024-01-09	3256232	1512966	1995-03-21 07:30:00	Comp Detailed US	Finalized	Present	2024-05-29	45.9	186.6	159.6	32.9	male	Fred Fredriskson MD	Vicky Martinez, RDMS	2024-05-23	4315	M	Y
2024-01-09	3247112	1965667	1987-10-15 02:23:26	Comp Detailed US	Finalized	Present	2024-02-25	84	314.1	290.8	70.4	uncertain	Andrea Anderson MD	Tania Smith, RDMS	2024-02-17	2810	F	Y
2024-01-10	3254500	96413	1996-06-08 22:17:20	Follow up US	Revised	Present	2024-03-04	83.8	304.9	300.1	62.7		William Wilson MD	Angelica Zunj, RDMS	2024-03-04	3890	M	Y
2024-01-10	3153993	121011	1983-11-19 02:40:18	Follow up US	Finalized	Present	2024-04-04	69.6	260.9	235.8	59.6	male	William Wilson MD	Vicky Martinez, RDMS	2024-03-20	3290	M	Y
2024-01-10	3189125	521427	1992-07-21 21:39:22	Follow up US	Finalized	Present	2024-05-07	50.8	209.9	171.8	37.2	male	Andrea Anderson MD	Jessica Yuan, RDMS	2024-02-24	1305	M	Y
2024-01-10	3071878	846030	1988-08-20 22:41:15	Comp Detailed US	Finalized	Present	2024-06-03	47.9	171.8	153.2	33.7	male	Fred Fredriskson MD	Estefania Traun, RDMS	2024-05-24	3490	M	Y
2024-01-10	3116873	1010474	1988-09-29 20:52:58	Follow up US	Finalized	Present	2024-04-03	74.5	266.8	250.9	51.7		Fred Fredriskson MD	Vicky Martinez, RDMS	2024-04-03	3760	M	Y
2024-01-10	3260870	1849741	1993-11-17 15:19:41	Comp Detailed US	Revised	Present	2024-06-27	32.5	121.1	99.8	18.9	male	Fred Fredriskson MD	Vicky Martinez, RDMS	2024-06-21	3290	M	Y
2024-01-11	3258370	276526	1996-01-03 00:33:45	Follow up US	Revised	Present	2024-02-28	93.5	325.5	320.8	64.8		Jackie Jackson MD	Vicky Martinez, RDMS	2024-02-22	4170	M	Y
2024-01-11	3220624	470203	1987-01-23 07:58:07	Follow up US	Finalized	Present	2024-05-17	51.4	196.6	180.3	41.6	female	William Wilson MD	Angelica Zunj, RDMS	2024-05-07	3080	F	Y
2024-01-11	3258829	584186	1995-05-02 13:04:41	Follow up US	Finalized	Present	2024-02-06	88.3	303.1	285.1	63.3		Fred Fredriskson MD	Vicky Martinez, RDMS	2025-06-15	3370	F	Y
2024-01-11	3187859	913601	1993-12-27 15:00:00	Comp Detailed US	Finalized	Present	2024-06-07	46.9	171.6	139.7	28	male	Fred Fredriskson MD	Angelica Zunj, RDMS	2024-05-29	3250	M	Y
2024-01-11	3158177	1738746	1995-02-09 06:42:11	Follow up US	Finalized	Present	2024-02-26	82.2	301.5	292.3	63.5		William Wilson MD	Vicky Martinez, RDMS	2024-02-24	3410	M	Y
2024-01-11	3142287	1751702	1991-12-10 02:23:26	Fetal Echo	Finalized	Present	2024-04-24	60.7	222.4	203.1	46.4	female	Fred Fredriskson MD	Vicky Martinez, RDMS	2024-04-20	3280	F	Y
2024-01-12	3048154	121195	1990-10-19 10:10:18	Comp Detailed US	Finalized	Present	2024-06-13	43.9	151.2	128.5	29.9	female	William Wilson MD	Estefania Traun, RDMS	2024-06-08	3420	F	Y
2024-01-12	3025696	301560	1980-04-17 00:14:03	Fetal Echo	Finalized	Present	2024-05-04	57.4	226	190.1	45	male	Andrea Anderson MD	Estefania Traun, RDMS	2024-05-09	4010	M	Y
2024-01-12	3234885	504475	1998-12-10 06:33:45	Comp Detailed US	Finalized	Present	2024-02-15	96.6	346.9	348.9	68	uncertain	Fred Fredriskson MD	Tania Smith, RDMS	2024-01-14	3585	F	Y
2024-01-12	3279529	645133	1996-05-24 21:36:33	Follow up US	Finalized	Present	2024-03-07	88.3	300.9	282.4	65.4		Jackie Jackson MD	Juana Manadeva, RDMS	2024-01-18	2235	M	Y
2024-01-12	3238763	811695	1991-04-02 05:20:37	Follow up US	Finalized	Present	2024-02-29	82.7	306.4	305	62.9		William Wilson MD	Estefania Traun, RDMS	2024-02-26	3790	F	Y
2024-01-12	3211838	874057	1988-04-01 23:05:09	Follow up US	Finalized	Present	2024-02-17	88.1	316.1	292.9	64.8		Andrea Anderson MD	Estefania Traun, RDMS	2024-02-03	2830	F	Y
2024-01-12	3165458	877275	1994-06-29 10:07:30	Follow up US	Finalized	Present	2024-04-05	68.4	261.5	241.2	51.7	female	Jackie Jackson MD	Natalie Serano, RDMS	2024-03-27	2640	F	Y
2024-01-12	3118865	913793	2000-07-22 21:57:39	Follow up US	Finalized	Present	2024-03-07	81.8	298.6	280.3	60.1	female	William Wilson MD	Jessica Yuan, RDMS	2024-02-25	2770	F	Y
2024-01-13	3105104	104826	1992-01-26 02:37:30	Comp Detailed US	Finalized	Present	2024-06-08	41.6	153.1	126.6	28.3	female	William Wilson MD	Natalie Serano, RDMS	2024-06-02	3120	F	Y
2024-01-13	3167597	157125	1994-06-20 11:19:13	Follow up US	Finalized	Present	2024-05-20	50	187.4	159	38.4	male	Fred Fredriskson MD	Vicky Martinez, RDMS	2024-05-10	2960	M	Y
2024-01-13	2985015	370443	1988-05-08 00:30:56	Comp Detailed US	Finalized	Present	2024-06-06	39.8	160.6	130.9	30.1	male	Fred Fredriskson MD	Jessica Yuan, RDMS	2024-05-30	2920	M	Y
2024-01-13	3212195	1183573	1987-01-04 08:15:00	Comp Detailed US	Finalized	Present	2024-06-02	45.8	175.2	144.9	29.4	male	Fred Fredriskson MD	Vicky Martinez, RDMS	2024-05-24	3320	M	Y
2024-01-13	3203872	1723396	1987-04-30 06:29:31	Comp Detailed US	Finalized	Present	2024-05-21	51.7	187.5	159.1	34.2	male	William Wilson MD	Natalie Serano, RDMS	2024-05-01	3240	M	Y
2024-01-14	3122172	318914	1989-10-08 15:28:07	Comp Detailed US	Finalized	Present	2024-05-18	52.5	195.4	175.6	34.4	female	William Wilson MD	Apoorva Kota, RDMS	2024-05-03	2720	F	Y
2024-01-14	3212402	404043	1980-11-10 20:45:56	Comp Detailed US	Finalized	Present	2024-05-29	51.8	183.2	164.2	35.9	male	Fred Fredriskson MD	Apoorva Kota, RDMS	2024-05-08	1980	M	Y
2024-01-14	3237486	1134778	1993-08-01 16:32:48	Comp Detailed US	Finalized	Present	2024-05-08	55.4	218.6	183.6	41.2	unknown	Jackie Jackson MD	Tania Smith, RDMS	2024-05-16	3790	M	Y
2024-01-14	3259596	1942895	1987-09-27 02:57:11	Comp Basic US	Finalized	Present	2024-03-09	82.3	307.3	294.6	62.1	male	Jackie Jackson MD	Tania Smith, RDMS	2024-03-03	4220	M	Y
2024-01-15	3225308	690464	1989-10-07 15:14:03	Follow up US	Finalized	Present	2024-04-03	75	274.7	249.2	54.5		William Wilson MD	Apoorva Kota, RDMS	2024-03-18	2770	F	Y
2024-01-16	3253224	438742	1984-05-13 00:45:00	Comp Detailed US	Finalized	Present	2024-06-09	44.4	169.4	138.8	30	male	William Wilson MD	Angelica Zunj, RDMS	2024-06-08	2920	M	Y
2024-01-16	3214295	620580	1990-05-17 10:59:31	Comp Basic US	Finalized	Present	2024-03-24	82.4	293.5	275.7	60.2	male	Fred Fredriskson MD	Tania Smith, RDMS	2024-03-19	3970	M	Y
2024-01-16	3216692	814498	1991-07-14 04:06:05	Follow up US	Finalized	Present	2024-02-26	82.1	307.5	299.6	68.1		Fred Fredriskson MD	Apoorva Kota, RDMS	2024-02-21	3220	F	Y
2024-01-16	3032676	1262709	1983-09-09 03:14:03	Comp Detailed US	Finalized	Present	2024-06-10	45	156.8	134.8	29.1	female	Jennifer Jenson MD	Estefania Traun, RDMS	2024-02-28	660	F	Y
2024-01-17	3186835	168164	1985-03-03 19:27:11	Follow up US	Finalized	Present	2024-05-23	50.4	193.3	160.4	38.8	female	Jennifer Jenson MD	Estefania Traun, RDMS	2024-05-23	3030	F	Y
2024-01-18	3273257	532651	1992-05-26 22:14:31	Follow up US	Finalized	Present	2024-02-28	78.6	297	286.9	65.1	male	William Wilson MD	Estefania Traun, RDMS	2024-02-28	2520	M	Y
2024-01-18	3260768	1041206	1988-04-26	Follow up US	Finalized	Present	2024-05-11	59.3	209.4	184	44.1	male	William Wilson MD	Vicky Martinez, RDMS	2024-04-27	3145	M	Y
2024-01-18	3297896	1046774	1990-12-19 06:39:22	Follow up US	Finalized	Present	2024-02-15	94.4	324.6	348.4	78.2	male	Jennifer Jenson MD	Estefania Traun, RDMS	2024-02-01	3930	M	Y
2024-01-18	3255620	1541542	1984-03-13 01:04:41	Comp Detailed US	Revised	Present	2024-06-05	50	181.7	150.5	33.6	male	Jennifer Jenson MD	Natalie Serano, RDMS	2024-05-14	2990	M	Y
2024-01-18	3234988	1734346	1993-05-18 18:22:30	Comp Detailed US	Finalized	Present	2024-06-12	44.5	165	136	29.4	female	Jennifer Jenson MD	Tania Smith, RDMS	2024-05-25	2710	F	Y
2024-01-19	3132662	165295	1991-08-20 03:30:56	Follow up US	Finalized	Present	2024-02-24	82.4	316.5	288.2	64.7		William Wilson MD	Estefania Traun, RDMS	2024-02-20	2750	M	Y
2024-01-19	3213783	547557	1999-07-22 02:48:45	Follow up US	Finalized	Present	2024-01-27	92.2	333.8	360.7	75.7		William Wilson MD	Estefania Traun, RDMS	2024-01-27	3580	F	Y
2024-01-19	3135724	872856	1994-11-03 10:06:05	Comp Detailed US	Finalized	Present	2024-06-14	40.9	160.3	132.4	27.7	female	Jennifer Jenson MD	Natalie Serano, RDMS	2024-06-04	3470	F	Y
2024-01-19	3292538	1242850	1990-09-26 09:39:22	Comp Basic US	Finalized	Present	2024-04-04	77.3	272.5	245.2	53.1	female	Fred Fredriskson MD	Apoorva Kota, RDMS	2024-04-01	3040	F	Y
2024-01-19	3252408	1736736	1998-04-21 12:50:37	Comp Detailed US	Finalized	Present	2024-06-16	44.4	170	140.2	31.2	male	Jennifer Jenson MD	Jessica Yuan, RDMS	2024-06-16	3420	M	Y
2024-01-19	3048511	1851288	1988-01-06 01:35:37	Follow up US	Finalized	Present	2024-03-13	85.5	306	296.9	65.8	female	William Wilson MD	Jessica Yuan, RDMS	2024-03-14	4130	F	Y
2024-01-20	3300140	939039	1993-08-28 15:28:07	Follow up US	Revised	Present	2024-03-16	82.6	302.8	287.5	63.5	male	William Wilson MD	Estefania Traun, RDMS	2024-02-18	2445	M	Y
2024-01-20	3215263	1073520	1999-05-24 04:55:18	Follow up US	Finalized	Present	2024-04-07	71.5	269.2	231.8	49.4	male	William Wilson MD	Natalie Serano, RDMS	2024-02-29	2290	M	Y
2024-01-20	3154097	1255365	1998-08-09 11:30:28	Comp Detailed US	Finalized	Present	2024-06-14	40.3	156.9	131.3	27.1	male	Fred Fredriskson MD	Natalie Serano, RDMS	2024-06-18	3360	M	Y
2024-01-20	3287868	1397768	1986-07-11 09:40:46	Follow up US	Finalized	Present	2024-02-06	87.7	335.9	335.2	70.3		Fred Fredriskson MD	Tania Smith, RDMS	2024-01-28	3530	M	Y
2024-01-20	3288174	1739361	1990-08-05 09:33:45	Follow up US	Finalized	Present	2024-03-07	81.7	307.5	304.3	62.9		Fred Fredriskson MD	Estefania Traun, RDMS	2024-03-01	2970	M	Y
2024-01-20	3288428	1741955	1990-04-30 10:31:24	Comp Basic US	Finalized	Present	2024-03-11	84	319.5	311.9	62.5	male	Fred Fredriskson MD	Apoorva Kota, RDMS	2024-02-23	3300	M	Y
2024-01-20	3257960	1765351	1987-11-21 02:54:22	Comp Detailed US	Revised	Present	2024-05-30	53.6	194.2	162	35.7	male	Jennifer Jenson MD	Apoorva Kota, RDMS	2024-05-09	2570	M	Y
2024-01-21	3274125	387242	1992-12-16 19:59:31	Follow up US	Finalized	Present	2024-04-12	69.8	258.4	237.3	52.2	female	Jennifer Jenson MD	Tania Smith, RDMS	2024-03-15	2660	F	Y
2024-01-21	3234581	560632	1986-05-19 12:33:45	Comp Detailed US	Finalized	Present	2024-06-14	43.8	169.4	146.1	34.3	female	Jennifer Jenson MD	Tania Smith, RDMS	2024-06-08	3490	F	Y
2024-01-21	2894522	666443	1989-07-20 16:35:37	Follow up US	Finalized	Present	2024-03-16	79.9	300	271.3	59.4	male	William Wilson MD	Apoorva Kota, RDMS	2024-03-20	3230	M	Y
2024-01-21	3272696	879401	1985-10-24 14:27:39	Comp Basic US	Finalized	Present	2024-04-02	73	269.5	250.6	54.2	female	William Wilson MD	Jessica Yuan, RDMS	2024-03-12	2500	F	Y
2024-01-21	3269179	1050029	1992-06-17 00:12:39	Comp Detailed US	Finalized	Present	2024-06-20	39.9	145.1	122.1	23.5	male	Jennifer Jenson MD	Natalie Serano, RDMS	2024-06-26	3180	M	Y
2024-01-21	3288327	1835807	1988-02-26 06:01:24	Follow up US	Finalized	Present	2024-04-13	65.4	249.7	222.2	59	male	William Wilson MD	Tania Smith, RDMS	2025-02-08	2880	F	Y
2024-01-21	3304989	1930625	1992-10-06 20:36:05	Follow up US	Finalized	Present	2024-02-26	86.3	309.9	309.2	68.7	female	William Wilson MD	Apoorva Kota, RDMS	2024-02-20	3270	F	Y
2024-01-23	3085862	253010	1991-10-01 04:10:18	Comp Detailed US	Finalized	Present	2024-06-19	43.9	162.5	144.1	26.7	female	Fred Fredriskson MD	Apoorva Kota, RDMS	2024-06-15	3230	F	Y
2024-01-23	3288479	578108	1996-04-08 23:38:54	Comp Detailed US	Finalized	Present	2024-03-13	83.7	301.4	279.5	62	uncertain	Fred Fredriskson MD	Estefania Traun, RDMS	2024-02-16	2645	F	Y
2024-01-23	3072288	617211	1988-01-15 02:27:39	Comp Detailed US	Finalized	Present	2024-06-17	42	161	138.6	29.1	female	Andrea Anderson MD	Angelica Zunj, RDMS	2024-05-31	3270	F	Y
2024-01-23	3113862	1960073	1993-04-17 18:50:37	Comp Detailed US	Finalized	Present	2024-06-18	42.5	158.7	135.6	31.6	male	Andrea Anderson MD	Angelica Zunj, RDMS	2024-05-26	2570	M	Y
2024-01-24	3233154	167499	1990-03-21 10:58:07	Follow up US	Finalized	Present	2024-02-21	88	323.8	331.9	71.5		Fred Fredriskson MD	Apoorva Kota, RDMS	2024-01-26	3040	M	Y
2024-01-24	3231725	257327	1988-04-25 22:45:28	Follow up US	Finalized	Present	2024-02-19	81.5	296.1	277.6	68	female	Jennifer Jenson MD	Vicky Martinez, RDMS	2024-02-03	2205	F	Y
2024-01-24	3319415	541155	1994-09-08 08:58:35	Comp Detailed US	Finalized	Present	2024-04-29	61.8	225.9	225.4	46.9	female	Jennifer Jenson MD	Vicky Martinez, RDMS	2024-02-18	1595	F	Y
2024-01-24	3231879	755564	1990-10-10 08:05:09	Follow up US	Finalized	Present	2024-02-24	81.2	306.5	298.7	71.2	female	Jennifer Jenson MD	Vicky Martinez, RDMS	2024-02-15	3200	F	Y
2024-01-24	3230961	925051	1989-04-24 18:49:13	Comp Detailed US	Finalized	Present	2024-06-19	48.2	173.5	147.3	32.7	female	Andrea Anderson MD	Tania Smith, RDMS	2024-05-17	2285	F	Y
2024-01-24	3003067	1579960	1985-08-20 17:27:39	Comp Detailed US	Finalized	Present	2024-06-25	40.5	151.5	113.1	25.9	male	Jennifer Jenson MD	Jessica Yuan, RDMS	2024-06-21	2560	M	Y
2024-01-25	3153178	186385	1990-03-19 13:31:24	Comp Detailed US	Finalized	Present	2024-06-22	42.7	154.4	127.9	26.9	female	Jennifer Jenson MD	Apoorva Kota, RDMS	2024-06-14	3020	F	Y
2024-01-25	3288986	442757	1986-02-13 14:03:45	Comp Detailed US	Finalized	Present	2024-06-12	50	189	159.5	30.2	male	Fred Fredriskson MD	Estefania Traun, RDMS	2024-06-11	3575	M	Y
2024-01-25	3293047	1113322	2001-10-13 13:55:18	Follow up US	Finalized	Present	2024-03-01	90.2	317.4	304.2	63.8		Fred Fredriskson MD	Apoorva Kota, RDMS	2024-02-23	3250	M	Y
2024-01-26	3133275	73924	1975-12-26 02:48:02	Comp Detailed US	Finalized	Present	2024-06-25	35.5	148.7	123.7	26.8	male	Fred Fredriskson MD	Jessica Yuan, RDMS	2024-06-25	3120	M	Y
2024-01-26	2925907	180415	1988-05-05 22:48:16	Follow up US	Finalized	Present	2024-03-21	79.2	291.3	273.1	57.2	female	Jackie Jackson MD	Apoorva Kota, RDMS	2024-03-03	2420	F	Y
2024-01-26	2841530	333634	1993-09-20 15:49:13	Comp Basic US	Revised	Present	2024-04-16	74.3	259.1	244.3	54.6	male	Jackie Jackson MD	Vicky Martinez, RDMS	2024-04-06	2980	M	Y
2024-01-26	3274939	346510	1988-06-30 22:24:22	Comp Basic US	Finalized	Present	2024-04-01	76.8	277.5	255.4	59.3	male	Fred Fredriskson MD	Tania Smith, RDMS	2024-03-27	3200	M	Y
2024-01-26	3237641	738325	1997-02-14 18:26:43	Comp Detailed US	Finalized	Present	2024-03-17	85	298.3	287.1	58.1	male	Andrea Anderson MD	Natalie Serano, RDMS	2024-03-17	3520	M	Y
2024-01-26	3146609	879492	1995-06-09 06:35:09	Comp Detailed US	Finalized	Present	2024-06-22	45.6	159.4	133	30	male	Jennifer Jenson MD	Tania Smith, RDMS	2024-06-22	3410	M	Y
2024-01-26	3280805	1318230	1983-10-03 04:25:46	Comp Detailed US	Finalized	Present	2024-06-12	50.3	173.4	146.4	32.9	female	Jennifer Jenson MD	Jessica Yuan, RDMS	2024-06-10	3580	F	Y
2024-01-26	3157310	1557920	1990-02-16 14:30:28	Comp Detailed US	Revised	Present	2024-06-26	49.1	174.4	146.1	27.3	male	Fred Fredriskson MD	Vicky Martinez, RDMS	2024-06-29	4130	M	Y
2024-01-26	3046626	1618121	1985-11-04 15:45:00	Comp Detailed US	Finalized	Present	2024-06-14	50.6	180.1	156.6	31.3	male	Jackie Jackson MD	Apoorva Kota, RDMS	2024-06-25	4190	M	Y
2024-01-26	3335223	1709312	1995-11-30 02:23:26	Comp Basic US	Finalized	Present	2024-04-24	72.2	265.6	246.5	56.2	female	Jennifer Jenson MD	Apoorva Kota, RDMS	2024-04-10	3250	F	Y
2024-01-26	3219297	1849724	1987-04-23 05:41:43	Follow up US	Finalized	Present	2024-06-14	48.2	175.7	144.3	29.1	female	Jennifer Jenson MD	Natalie Serano, RDMS	2024-04-15	1405	F	Y
2024-01-26	3299225	1955518	1989-02-26 19:27:11	Follow up US	Finalized	Present	2024-05-16	56.7	219.3	194	49.7	female	Fred Fredriskson MD	Estefania Traun, RDMS	2024-05-14	3060	F	Y
2024-01-27	3304533	311442	1990-06-01 10:34:13	Follow up US	Finalized	Present	2024-03-17	87.9	322.1	292.8	62.5	male	Jackie Jackson MD	Estefania Traun, RDMS	2024-02-23	2940	M	Y
2024-01-27	3174867	421839	1988-01-31 02:03:45	Comp Detailed US	Finalized	Present	2024-06-08	49.1	193.9	171	33.6	male	Jennifer Jenson MD	Natalie Serano, RDMS	2024-06-01	4030	M	Y
2024-01-27	3333036	870550	1987-08-21 03:15:28	Follow up US	Finalized	Present	2024-02-22	89.3	333.4	316.7	69.1		Fred Fredriskson MD	Laura Gavva, RDMS	2024-02-14	4620	F	Y
2024-01-27	3216488	901978	1988-05-08 00:16:52	Follow up US	Finalized	Present	2024-05-16	58.6	212.9	191.2	42	female	Jackie Jackson MD	Tania Smith, RDMS	2024-05-19	3570	F	Y
2024-01-27	3313825	939039	1993-07-07 15:28:07	Comp Basic US	Finalized	Present	2024-03-14	84.4	316.2	285.6	66.5	male	Fred Fredriskson MD	Natalie Serano, RDMS	2024-02-18	2445	M	Y
2024-01-27	3025645	1627400	1991-02-21 05:47:20	Follow up US	Finalized	Present	2024-02-10	105	372.7	352.1	75.7		Jennifer Jenson MD	Vicky Martinez, RDMS	2024-01-27	3940	M	Y
2024-01-28	3327451	254348	1997-02-20 18:02:48	Follow up US	Finalized	Present	2024-02-19	83.2	294.8	278.7	71.1	female	Jennifer Jenson MD	Vicky Martinez, RDMS	2024-01-29	2345	F	Y
2024-01-28	3124008	356357	1993-07-09 17:24:50	Comp Detailed US	Finalized	Present	2024-06-25	49.5	168.2	146	30.1	male	Fred Fredriskson MD	Apoorva Kota, RDMS	2024-06-04	3185	M	Y
2024-01-28	3297129	809496	1993-09-09 16:27:11	Comp Detailed US	Finalized	Present	2024-06-23	48.9	169.3	138.8	31.3	male	Jackie Jackson MD	Jessica Yuan, RDMS	2024-06-24	4475	M	Y
2024-01-28	3131083	1411568	1990-01-18 13:28:35	Comp Basic US	Finalized	Present	2024-04-06	75.8	282.1	268.2	55.3	male	Fred Fredriskson MD	Apoorva Kota, RDMS	2024-03-23	3180	M	Y
2024-01-28	3301571	1649701	1997-03-10 18:30:56	Comp Basic US	Finalized	Present	2024-04-14	76.8	284.6	247.3	52.4	female	Jennifer Jenson MD	Estefania Traun, RDMS	2024-04-13	3350	F	Y
2024-01-29	2990059	1619653	1987-07-30 04:59:31	Comp Detailed US	Finalized	Present	2024-06-23	45.5	171.1	136.7	27.8	female	Jennifer Jenson MD	Deepa Yow, RDMS	2024-05-31	3045	F	Y
2024-01-30	3226581	1010101	1992-11-27 19:28:35	Comp Basic US	Finalized	Present	2024-03-04	89.9	304.9	298.7	73.1	female	William Wilson MD	Vicky Martinez, RDMS	2024-02-16	2620	F	Y
2024-01-30	2974108	1687357	1991-08-07 03:40:46	Follow up US	Finalized	Present	2024-03-26	76.4	300.8	280.2	63.1	male	Andrea Anderson MD	Vicky Martinez, RDMS	2024-03-20	3765	M	Y
2024-01-31	3180830	48773	1998-03-04 22:08:54	Comp Detailed US	Revised	Present	2024-06-23	45.6	165.2	134.1	29.3	female	Jennifer Jenson MD	Tania Smith, RDMS	2025-11-18	3310	M	Y
2024-01-31	3083363	280045	1987-02-04 05:58:35	Follow up US	Finalized	Present	2024-03-01	89.7	313.7	303.1	66.3	male	William Wilson MD	Vicky Martinez, RDMS	2024-02-18	3130	M	Y
2024-01-31	3266324	811695	1991-03-31 05:20:37	Follow up US	Finalized	Present	2024-03-02	88.3	325.4	331.8	71.7		William Wilson MD	Estefania Traun, RDMS	2024-02-26	3790	F	Y
2024-01-31	3240138	1169371	1987-07-25 03:59:03	Follow up US	Finalized	Present	2024-04-12	77.9	281.7	252.7	58.2	male	Andrea Anderson MD	Tania Smith, RDMS	2024-03-28	3170	M	Y
2024-01-31	3310223	1712040	1993-06-30 16:46:52	Comp Basic US	Finalized	Present	2024-04-23	73.2	271.7	230	52.8	male	William Wilson MD	Vicky Martinez, RDMS	2024-04-17	3200	M	Y
2024-02-01	3134092	39273	1990-01-02 13:32:48	Follow up US	Finalized	Present	2024-05-05	64.8	248	219.9	48.7	male	Jennifer Jenson MD	Jessica Yuan, RDMS	2024-04-26	3240	M	Y
2024-02-01	2809152	447953	1974-10-31 08:59:17	Follow up US	Finalized	Present	2024-04-27	72.3	276.3	277.5	57.4	male	William Wilson MD	Vicky Martinez, RDMS	2024-04-12	4155	M	Y
2024-02-01	3180016	797156	1988-07-19 21:47:48	Follow up US	Finalized	Present	2024-03-26	79.8	300.3	278.6	59.4	female	Andrea Anderson MD	Apoorva Kota, RDMS	2024-03-06	2500	F	Y
2024-02-01	3237179	1147959	2003-11-26 10:24:22	Fetal Echo	Finalized	Present	2024-03-25	91.3	307.5	274.4	64.7	male	Jennifer Jenson MD	Vicky Martinez, RDMS	2025-07-24	3250	F	Y
2024-02-01	3230196	1872335	1987-08-19 05:41:43	Comp Detailed US	Finalized	Present	2024-06-24	49.2	176.9	161.7	35.9	female	William Wilson MD	Jessica Yuan, RDMS	2024-06-23	3320	F	Y
2024-02-02	3239574	504160	1990-07-01 09:36:33	Follow up US	Finalized	Present	2024-03-02	89.5	326	324.4	68.8	male	William Wilson MD	Apoorva Kota, RDMS	2024-02-27	3370	M	Y
2024-02-02	3234682	715174	2001-06-12 16:42:39	Follow up US	Finalized	Present	2024-04-30	70.1	256.7	230.5	48.9	male	William Wilson MD	Apoorva Kota, RDMS	2024-04-12	2780	M	Y
2024-02-02	3246397	1209161	1987-06-19 03:46:24	Follow up US	Finalized	Present	2024-02-26	90.1	318.9	329.1	72.5	male	Jackie Jackson MD	Jessica Yuan, RDMS	2024-02-22	3270	M	Y
2024-02-02	3240393	1223456	1996-03-19 09:18:16	Comp Detailed US	Finalized	Present	2024-06-24	47.3	177	154.5	29.8	male	Jennifer Jenson MD	Estefania Traun, RDMS	2025-09-28	2930	F	Y
2024-02-02	3241874	1492294	1985-07-26 15:39:22	Follow up US	Finalized	Present	2024-04-04	78.4	280.4	253.5	61	female	Jackie Jackson MD	Vicky Martinez, RDMS	2024-03-18	2870	F	Y
2024-02-02	3269535	1738746	1995-02-06 06:42:11	Follow up US	Finalized	Present	2024-02-25	90.5	328.4	322.1	71.9		Jackie Jackson MD	Tania Smith, RDMS	2024-02-25	3410	M	Y
2024-02-02	3292844	1965667	1987-10-24 02:23:26	Follow up US	Finalized	Present	2024-02-25	93.4	333.8	313	72.2	uncertain	Jennifer Jenson MD	Angelica Zunj, RDMS	2024-02-19	2810	F	Y
2024-02-03	3344299	1194127	1983-04-09 07:06:05	Comp Detailed US	Finalized	Present	2024-06-30	44.2	157.6	130.9	28	male	William Wilson MD	Estefania Traun, RDMS	2024-06-20	2780	M	Y
2024-02-03	3175275	1339519	1985-01-12 20:24:50	Comp Detailed US	Finalized	Present	2024-06-27	48.8	175.4	140.4	31	male	William Wilson MD	Tania Smith, RDMS	2024-06-14	3270	M	Y
2024-02-03	3179711	1345350	1992-08-13 22:53:54	Comp Detailed US	Finalized	Present	2024-06-30	41.6	160.5	143.9	24.1	female	William Wilson MD	Apoorva Kota, RDMS	2024-06-25	3330	F	Y
2024-02-03	3235347	1422764	1988-08-04 21:50:37	Follow up US	Finalized	Present	2024-03-30	78.9	297.3	264.4	61.5	female	Jennifer Jenson MD	Vicky Martinez, RDMS	2024-03-09	3110	F	Y
2024-02-03	3323995	1555878	1993-03-20 20:17:48	Comp Detailed US	Finalized	Present	2024-06-29	45.7	162.8	131.1	27.1	female	Jackie Jackson MD	Tania Smith, RDMS	2024-07-07	3030	F	Y
2024-02-03	3306669	1591541	1989-02-15 18:25:18	Comp Basic US	Finalized	Present	2024-03-03	80.5	322.2	312.3	67.7	uncertain	Jackie Jackson MD	Tania Smith, RDMS	2024-02-24	2880	F	Y
2024-02-03	3334714	1645837	1988-05-29 23:48:45	Comp Basic US	Finalized	Present	2024-04-21	75.6	283.4	249.8	56.6	male	Jennifer Jenson MD	Jessica Yuan, RDMS	2024-04-22	3310	M	Y
2024-02-03	3301723	1719834	1992-02-02 02:30:28	Comp Detailed US	Finalized	Present	2024-06-27	47.3	174.8	141.8	32.8	male	Jackie Jackson MD	Estefania Traun, RDMS	2024-06-09	2860	M	Y
2024-02-03	3366795	1938970	1986-08-30 08:55:46	Follow up US	Finalized	Present	2024-03-25	88.8	318.8	320	64.9		Jennifer Jenson MD	Juana Manadeva, RDMS	2024-03-04	3560	M	Y
2024-02-05	3371805	12904	1991-07-27 04:15:56	Follow up US	Finalized	Present	2024-03-27	87.3	309.5	285.2	57.2	female	Jennifer Jenson MD	Deepa Yow, RDMS	2024-03-30	3360	F	Y
2024-02-05	3379148	541155	1994-08-06 08:58:35	Follow up US	Finalized	Present	2024-04-29	64.2	242.8	230.3	50.5		William Wilson MD	Leticia Castro, RDMS	2024-02-17	1595	F	Y
2024-02-05	3224389	1251804	1982-03-30 12:41:29	Comp Basic US	Finalized	Present	2024-04-27	72.1	260.6	217.5	52		Jennifer Jenson MD	Jessica Yuan, RDMS	2024-04-01	2235	F	Y
2024-02-05	3252816	1735664	1991-02-23 06:12:39	Follow up US	Finalized	Present	2024-03-04	83.8	299.3	309.4	75.8	female	Jennifer Jenson MD	Deepa Yow, RDMS	2024-03-04	3570	F	Y
2024-02-05	3375170	1745326	1998-10-30 07:56:43	Follow up US	Revised	Present	2024-03-25	76.1	294	280	60.2	female	Jennifer Jenson MD	Estefania Traun, RDMS	2024-03-19	3090	F	Y
2024-02-06	3322164	285047	1984-03-15	Follow up US	Finalized	Present	2024-03-13	88	305.3	299.1	66		William Wilson MD	Apoorva Kota, RDMS	2024-02-24	2590	M	Y
2024-02-06	3336190	814498	1991-06-19 04:06:05	Follow up US	Revised	Present	2024-02-26	86	319.4	328.9	69.1	female	Andrea Anderson MD	Jessica Yuan, RDMS	2024-02-20	3220	F	Y
2024-02-06	3218275	1250132	1990-07-11 11:38:54	Comp Detailed US	Finalized	Present	2024-07-03	44.5	165.6	146.6	25.8	female	William Wilson MD	Jessica Yuan, RDMS	2024-07-06	3620	F	Y
2024-02-06	3305345	1656668	1986-10-19 08:55:46	Follow up US	Finalized	Present	2024-03-27	88.1	311.5	301.8	69.6		Andrea Anderson MD	Angelica Zunj, RDMS	2024-03-24	4270	M	Y
2024-02-07	3379652	182879	1991-05-20 06:05:37	Follow up US	Finalized	Present	2024-07-19	38.4	136	117	23.7		William Wilson MD	Angelica Zunj, RDMS	2024-06-17	2790	M	Y
2024-02-07	3297336	316330	1996-01-10 03:02:48	Comp Detailed US	Finalized	Present	2024-07-03	44.6	167.7	142.1	26.6	female	Fred Fredriskson MD	Angelica Zunj, RDMS	2024-06-17	3700	F	Y
2024-02-07	3294368	532651	1992-07-15 22:14:31	Comp Basic US	Finalized	Present	2024-02-29	85.8	322	296.5	67.3	male	Andrea Anderson MD	Tania Smith, RDMS	2024-03-01	2520	M	Y
2024-02-07	3328721	1418855	1990-05-21 12:14:03	Comp Detailed US	Finalized	Present	2024-07-05	43.2	166.8	147.4	30.9	female	Andrea Anderson MD	Tania Smith, RDMS	2024-06-15	3000	F	Y
2024-02-08	3308649	165295	1991-07-28 03:30:56	Comp Basic US	Finalized	Present	2024-02-24	87.3	324	313.7	69.2	male	Jackie Jackson MD	Jessica Yuan, RDMS	2024-02-20	2750	M	Y
2024-02-08	3347045	201063	1987-07-05 05:27:39	Comp Detailed US	Finalized	Present	2024-07-01	47.9	174.1	146.8	33.1	male	Fred Fredriskson MD	Jessica Yuan, RDMS	2024-06-21	3490	M	Y
2024-02-08	3297388	207219	1991-12-17 03:11:15	Comp Detailed US	Finalized	Present	2024-07-03	42	165.5	141.1	33.2	male	Andrea Anderson MD	Jessica Yuan, RDMS	2024-07-02	3690	M	Y
2024-02-08	3271268	276526	1995-12-28 00:33:45	Follow up US	Finalized	Present	2024-02-28	92.1	335.1	344.3	74.3		Fred Fredriskson MD	Vicky Martinez, RDMS	2024-02-23	4170	M	Y
2024-02-08	3295439	620580	1990-05-04 10:59:31	Follow up US	Finalized	Present	2024-03-26	87.4	311.8	302.5	69.1	male	William Wilson MD	Natalie Serano, RDMS	2024-03-21	3970	M	Y
2024-02-08	3370168	755564	1990-09-24 08:05:09	Follow up US	Finalized	Present	2024-02-23	87.4	311.7	314.9	75.2		Fred Fredriskson MD	Apoorva Kota, RDMS	2024-02-16	3200	F	Y
2024-02-08	3309313	1073520	1999-04-13 04:55:18	Follow up US	Finalized	Present	2024-04-07	77.9	294.6	263	56.7	male	Jackie Jackson MD	Natalie Serano, RDMS	2024-02-29	2290	M	Y
2024-02-08	3211736	1343379	1994-12-21 09:18:16	Comp Detailed US	Finalized	Present	2024-07-01	43.4	161.5	137.8	28.7	male	William Wilson MD	Vicky Martinez, RDMS	2024-06-23	3445	M	Y
2024-02-08	3363323	1487392	2001-02-04 20:00:56	Comp Detailed US	Finalized	Present	2024-06-19	51.9	185.9	158.7	35.6	female	Andrea Anderson MD	Estefania Traun, RDMS	2024-06-14	3590	F	Y
2024-02-08	3323943	1907150	1997-03-22 19:49:41	Comp Detailed US	Finalized	Present	2024-07-03	43.1	167.7	142.8	31.4	female	Jackie Jackson MD	Jessica Yuan, RDMS	2024-06-23	2720	F	Y
2024-02-08	3356425	1930625	1992-09-27 20:36:05	Follow up US	Finalized	Present	2024-02-26	87.4	328.5	327.8	78.9		Fred Fredriskson MD	Estefania Traun, RDMS	2024-02-22	3270	F	Y
2024-02-09	3326078	121011	1983-10-16 02:40:18	Follow up US	Finalized	Present	2024-04-05	81.2	298.1	287.8	64.5	male	William Wilson MD	Apoorva Kota, RDMS	2024-03-20	3290	M	Y
2024-02-09	3200098	253361	1986-09-23 10:30:00	Comp Detailed US	Finalized	Present	2024-07-03	49.2	174.6	149.1	29.3	male	William Wilson MD	Angelica Zunj, RDMS	2024-07-01	3310	M	Y
2024-02-09	3344604	431398	1980-03-31 01:01:52	Comp Detailed US	Finalized	Present	2024-07-02	43.2	168.1	151.5	33.8	female	William Wilson MD	Apoorva Kota, RDMS	2024-06-05	2920	F	Y
2024-02-09	3394146	521427	1992-07-14 21:39:22	Follow up US	Finalized	Present	2024-05-07	62.4	254.3	214.1	50.9	male	Andrea Anderson MD	Jessica Yuan, RDMS	2024-02-24	1305	M	Y
2024-02-09	3264445	1010474	1988-09-16 20:52:58	Follow up US	Finalized	Present	2024-04-02	87.6	312.7	302.4	62		Andrea Anderson MD	Apoorva Kota, RDMS	2024-04-02	3760	M	Y
2024-02-09	3304023	1851288	1987-11-19 01:35:37	Follow up US	Finalized	Present	2024-03-14	91.9	329.7	331.8	68.2	female	William Wilson MD	Jessica Yuan, RDMS	2024-03-12	4130	F	Y
2024-02-10	3287005	766914	1992-10-12 20:33:16	Follow up US	Finalized	Present	2024-03-28	79.5	293.1	292.4	64.3		Jackie Jackson MD	Tania Smith, RDMS	2024-03-11	2845	F	Y
2024-02-10	3278359	877275	1994-08-06 10:07:30	Follow up US	Finalized	Present	2024-04-04	82.9	304.4	278.8	59.3	female	Jackie Jackson MD	Apoorva Kota, RDMS	2024-03-28	2640	F	Y
2024-02-10	3118916	913793	2000-07-06 21:57:39	Follow up US	Finalized	Present	2024-03-05	91.6	314.6	312.2	68.8	female	Jackie Jackson MD	Jessica Yuan, RDMS	2024-02-25	2770	F	Y
2024-02-10	3348371	1741955	1990-05-26 10:31:24	Follow up US	Finalized	Present	2024-03-12	89.1	324.9	336.8	67.4	male	William Wilson MD	Angelica Zunj, RDMS	2024-02-25	3300	M	Y
2024-02-10	3282941	1942895	1987-08-19 02:57:11	Follow up US	Finalized	Present	2024-03-10	93.8	325.1	323.9	66.7	male	William Wilson MD	Jessica Yuan, RDMS	2024-03-01	4220	M	Y
2024-02-10	3401427	1951274	1988-07-25 22:07:30	Comp Basic US	Finalized	Present	2024-06-05	58.8	215.1	185.7	38.8	male	William Wilson MD	Juana Manadeva, RDMS	2024-02-27	875	M	Y
2024-02-11	3379956	96413	1996-05-26 22:17:20	Follow up US	Finalized	Present	2024-03-04	91.2	343	335.9	72.6		Fred Fredriskson MD	Natalie Serano, RDMS	2024-03-06	3890	M	Y
2024-02-11	3287362	1301387	1990-10-02 08:38:54	Follow up US	Finalized	Present	2024-04-06	79.2	292.1	273.1	64.2	male	Fred Fredriskson MD	Tania Smith, RDMS	2024-03-31	3100	M	Y
2024-02-12	3195148	1069890	1990-01-30 14:43:07	Comp Detailed US	Finalized	Present	2024-07-06	41.9	150.5	129.3	31	male	Fred Fredriskson MD	Apoorva Kota, RDMS	2024-06-30	2420	M	Y
2024-02-13	3412392	958937	1989-05-31 16:20:09	Comp Basic US	Finalized	Present	2024-03-30	84.3	307.7	284.9	65.9	male	Fred Fredriskson MD	Vicky Martinez, RDMS	2024-02-27	2480	M	Y
2024-02-13	3412242	1827261	1987-07-10 04:30:00	Limited US	Finalized	Present	2024-04-25	75.8	280	282.4	56.4		Fred Fredriskson MD	Juana Manadeva, RDMS	2024-04-09	3330	F	Y
2024-02-14	3398932	73924	1976-01-01 02:48:02	Follow up US	Finalized	Present	2024-06-26	48.3	193.2	157.8	30.8		Jennifer Jenson MD	Angelica Zunj, RDMS	2024-06-25	3120	M	Y
2024-02-14	3248845	425166	1994-11-04 10:00:28	Comp Detailed US	Finalized	Present	2024-07-08	44.1	176.4	141	28.7	male	Jennifer Jenson MD	Vicky Martinez, RDMS	2024-06-22	3250	M	Y
2024-02-14	3413713	541155	1994-09-10 08:58:35	Follow up US	Finalized	Present	2024-05-01	65	256.9	253.5	53.5		Fred Fredriskson MD	Laura Gavva, RDMS	2024-02-16	1595	F	Y
2024-02-14	3358567	578108	1996-02-17 23:38:54	Follow up US	Finalized	Present	2024-03-15	84.3	306.9	301.1	69.9		Fred Fredriskson MD	Jessica Yuan, RDMS	2024-02-15	2645	F	Y
2024-02-14	3285482	835341	1998-10-30 09:16:52	Follow up US	Finalized	Present	2024-04-07	89.8	304.7	281.4	63.4		Fred Fredriskson MD	Angelica Zunj, RDMS	2024-04-12	3610	M	Y
2024-02-14	3320435	1113322	2001-11-07 13:55:18	Follow up US	Finalized	Present	2024-02-29	89.7	338.6	335.4	69.8		William Wilson MD	Natalie Serano, RDMS	2024-02-23	3250	M	Y
2024-02-14	3418811	1262800	2000-08-18 21:26:43	Comp Basic US	Finalized	Present	2024-04-08	78.6	293	281.6	58.3	male	Fred Fredriskson MD	Leticia Castro, RDMS	2024-03-19	2845	M	Y
2024-02-14	3303817	1541542	1984-03-01 01:04:41	Follow up US	Finalized	Present	2024-06-04	62.8	229	198.1	46.2	male	William Wilson MD	Jessica Yuan, RDMS	2024-05-16	2990	M	Y
2024-02-14	3396031	1849741	1993-11-11 15:19:41	Follow up US	Finalized	Present	2024-06-26	53.8	195.7	165	33.9		Fred Fredriskson MD	Jessica Yuan, RDMS	2024-06-20	3290	M	Y
2024-02-15	3388321	285322	1999-03-15 07:52:30	Comp Detailed US	Finalized	Present	2024-06-17	56	204.3	174.7	40.3	male	Jennifer Jenson MD	Deepa Yow, RDMS	2024-06-02	3270	M	Y
2024-02-15	3327857	346510	1988-08-09 22:24:22	Follow up US	Finalized	Present	2024-03-30	83.3	298.1	283.5	69.1	male	William Wilson MD	Apoorva Kota, RDMS	2024-03-27	3200	M	Y
2024-02-15	3150933	440316	1993-03-11 19:08:54	Follow up US	Finalized	Present	2024-05-08	67.5	261	239.7	57.8	female	Fred Fredriskson MD	Vicky Martinez, RDMS	2024-04-16	1985	F	Y
2024-02-15	2885394	1838700	1981-01-10 19:58:07	Follow up US	Finalized	Present	2024-05-10	69.8	260.8	239.6	54.1	female	William Wilson MD	Angelica Zunj, RDMS	2024-05-13	3460	F	Y
2024-02-15	3412191	1854454	1991-12-01 03:23:54	Comp Detailed US	Finalized	Present	2024-07-08	46	170.4	149.9	31.9	male	Fred Fredriskson MD	Tania Smith, RDMS	2024-07-02	3690	M	Y
2024-02-15	3390825	1880288	1988-08-21 21:43:35	Follow up US	Finalized	Present	2024-05-04	78	270.3	248.3	56.1	male	Jennifer Jenson MD	Angelica Zunj, RDMS	2024-04-24	2650	M	Y
2024-02-16	3361528	180415	1988-06-17 22:48:16	Comp Basic US	Finalized	Present	2024-03-20	82.6	300.8	292.7	63.1	female	Fred Fredriskson MD	Jessica Yuan, RDMS	2024-03-05	2420	F	Y
2024-02-16	3362297	472709	1990-03-10 13:38:26	Comp Detailed US	Finalized	Present	2024-07-07	46.9	170.2	143	30.4	male	William Wilson MD	Apoorva Kota, RDMS	2024-06-20	2670	M	Y
2024-02-16	3396796	707705	1991-02-19 06:32:20	Follow up US	Finalized	Present	2024-04-13	82.5	297.8	291.4	62.4	male	Jennifer Jenson MD	Jessica Yuan, RDMS	2024-03-27	3490	M	Y
2024-02-16	3326638	787342	1994-02-13 13:30:00	Comp Basic US	Finalized	Present	2024-04-12	83.1	293.9	288.1	58.8	female	Jennifer Jenson MD	Apoorva Kota, RDMS	2024-04-11	3160	F	Y
2024-02-16	3402343	1050029	1992-06-13 00:12:39	Follow up US	Finalized	Present	2024-06-18	52.4	191.3	163.1	35.8	male	Jennifer Jenson MD	Natalie Serano, RDMS	2024-06-27	3180	M	Y
2024-02-16	3360041	1242850	1990-07-30 09:39:22	Follow up US	Finalized	Present	2024-04-03	83.1	310.2	300.1	61.1		Fred Fredriskson MD	Estefania Traun, RDMS	2024-03-30	3040	F	Y
2024-02-16	3305905	1370064	1991-12-25 03:07:01	Follow up US	Finalized	Present	2024-06-04	58	217	199.5	40.4	male	William Wilson MD	Apoorva Kota, RDMS	2024-05-27	3340	M	Y
2024-02-16	3241412	1929953	1989-10-30 15:40:46	Comp Detailed US	Finalized	Present	2024-07-09	44.5	165.1	153.8	30.3	female	William Wilson MD	Vicky Martinez, RDMS	2024-06-20	3140	F	Y
2024-02-17	3287464	370443	1988-04-18 00:30:56	Follow up US	Finalized	Present	2024-06-08	58.1	220.1	190	46.4	male	William Wilson MD	Tania Smith, RDMS	2024-05-31	2920	M	Y
2024-02-17	3203362	387242	1992-11-26 19:59:31	Follow up US	Finalized	Present	2024-04-14	79.6	292.7	270.2	66.3	female	William Wilson MD	Vicky Martinez, RDMS	2024-03-17	2660	F	Y
2024-02-17	3349954	1484350	1978-06-16 13:03:59	Comp Detailed US	Finalized	Present	2024-07-15	46.7	167.1	147.2	29.4	female	Fred Fredriskson MD	Estefania Traun, RDMS	2024-07-14	3690	F	Y
2024-02-17	3373591	1631944	1990-12-19 09:56:15	Comp Detailed US	Finalized	Present	2024-07-09	49.8	178.2	154	33.5	male	Jennifer Jenson MD	Apoorva Kota, RDMS	2024-07-10	3100	M	Y
2024-02-18	2942966	544555	1984-07-12 22:17:20	Follow up US	Finalized	Present	2024-04-13	73.9	280.7	278	58.7	female	William Wilson MD	Estefania Traun, RDMS	2024-04-12	3400	F	Y
2024-02-18	3314080	879401	1985-10-29 14:27:39	Follow up US	Revised	Present	2024-04-03	83.1	309.4	296.2	62.2		Fred Fredriskson MD	Estefania Traun, RDMS	2024-03-14	2500	F	Y
2024-02-18	3029725	1680951	1985-04-04 19:20:09	Comp Detailed US	Finalized	Present	2024-07-06	50.3	173.7	147.6	35.6	female	Jennifer Jenson MD	Apoorva Kota, RDMS	2024-06-29	3480	F	Y
2024-02-18	3377057	1835807	1988-02-06 06:01:24	Comp Basic US	Finalized	Present	2024-04-13	75.8	293.9	247.6	60.6	male	William Wilson MD	Natalie Serano, RDMS	2025-02-07	2880	F	Y
2024-02-19	3271064	937701	1988-09-17 23:09:22	Comp Detailed US	Finalized	Present	2024-07-14	44.2	159.6	140.1	27.7	male	Jennifer Jenson MD	Jessica Yuan, RDMS	2024-07-16	3770	M	Y
2024-02-20	3319313	368537	1990-11-01 09:57:39	Comp Detailed US	Finalized	Present	2024-07-16	39.7	153.8	138	28.1	female	Jennifer Jenson MD	Angelica Zunj, RDMS	2024-06-30	2870	F	Y
2024-02-20	3448318	521427	1992-08-11 21:39:22	Comp Basic US	Finalized	Present	2024-05-09	68.5	266.3	228.8	51.3	male	Andrea Anderson MD	Laura Gavva, RDMS	2024-02-25	1305	M	Y
2024-02-20	3445425	646204	1987-06-17 04:15:56	Follow up US	Finalized	Present	2024-04-11	86	319.5	296.8	69.3		Andrea Anderson MD	Laura Gavva, RDMS	2024-02-23	2180	M	Y
2024-02-20	3374816	1310238	1983-09-15 03:37:58	Comp Detailed US	Finalized	Present	2024-04-19	84.5	289.2	278.2	63.7	female	Jennifer Jenson MD	Vicky Martinez, RDMS	2024-04-04	2960	F	Y
2024-02-21	3228674	18987	1991-11-07 01:55:18	Follow up US	Finalized	Present	2024-03-24	90.2	329.7	314.7	69.8		Jennifer Jenson MD	Natalie Serano, RDMS	2024-03-19	3270	M	Y
2024-02-21	3384646	532651	1992-06-10 22:14:31	Follow up US	Finalized	Present	2024-02-28	87	309.6	299.3	72.2	male	Andrea Anderson MD	Vicky Martinez, RDMS	2024-03-01	2520	M	Y
2024-02-21	3439516	1422764	1988-08-18 21:50:37	Follow up US	Finalized	Present	2024-03-29	84.9	312.2	291.7	68	female	Andrea Anderson MD	Jessica Yuan, RDMS	2024-03-08	3110	F	Y
2024-02-22	3380415	264161	1990-05-18 13:04:41	Comp Detailed US	Finalized	Present	2024-07-19	43.1	157	133.4	3.2	female	Jackie Jackson MD	Apoorva Kota, RDMS	2024-07-07	3195	F	Y
2024-02-22	3283296	394560	1991-07-24 11:33:16	Follow up US	Finalized	Present	2024-04-15	83.9	294.3	272.5	64.5	female	Andrea Anderson MD	Jessica Yuan, RDMS	2025-06-26	3150	F	Y
2024-02-22	3380670	797156	1988-08-06 21:47:48	Follow up US	Revised	Present	2024-03-25	88.7	321.2	314.9	67.4	female	Jennifer Jenson MD	Apoorva Kota, RDMS	2024-03-07	2500	F	Y
2024-02-23	3462319	121195	1990-09-15 10:10:18	Follow up US	Finalized	Present	2024-06-14	59.2	212	191.8	45.3		Jackie Jackson MD	Apoorva Kota, RDMS	2024-06-07	3420	F	Y
2024-02-23	3453002	178518	1993-05-15 17:06:33	Follow up US	Finalized	Present	2024-03-19	90.2	326.3	305.6	66.6	male	Jennifer Jenson MD	Natalie Serano, RDMS	2024-03-09	2530	M	Y
2024-02-23	2841581	333634	1993-08-01 15:49:13	Follow up US	Finalized	Present	2024-04-17	79	300.4	286.8	64.4	male	Jackie Jackson MD	Estefania Traun, RDMS	2024-04-04	2980	M	Y
2024-02-23	3452646	440316	1993-02-28 19:08:54	Comp Basic US	Finalized	Present	2024-05-07	68.5	257	241.4	60.2	female	Jackie Jackson MD	Vicky Martinez, RDMS	2024-04-16	1985	F	Y
2024-02-23	3231777	1257765	1988-01-22 03:21:05	Comp Detailed US	Finalized	Present	2024-07-17	46.3	167.6	142.5	31	female	Jennifer Jenson MD	Natalie Serano, RDMS	2024-07-15	3590	F	Y
2024-02-23	3446537	1376435	1989-01-06 19:49:41	Follow up US	Finalized	Present	2024-05-05	68.6	254.5	246.2	55.8		Fred Fredriskson MD	Jessica Yuan, RDMS	2024-05-10	3455	F	Y
2024-02-23	3342619	1709312	1995-12-15 02:23:26	Follow up US	Finalized	Present	2024-04-22	78.4	286.6	277.8	61.9	female	Jackie Jackson MD	Angelica Zunj, RDMS	2024-04-11	3250	F	Y
2024-02-23	3402752	1876196	1990-02-12 14:19:13	Comp Detailed US	Finalized	Present	2024-07-15	46.7	167.6	138.3	32.8	female	Fred Fredriskson MD	Apoorva Kota, RDMS	2024-07-07	2830	F	Y
2024-02-23	3008160	1955518	1989-01-25 19:27:11	Follow up US	Revised	Present	2024-05-15	68.8	262	238	59	female	Andrea Anderson MD	Apoorva Kota, RDMS	2024-05-14	3060	F	Y
2024-02-24	3463337	157125	1994-06-08 11:19:13	Comp Basic US	Finalized	Present	2024-05-20	69.2	255.2	210.6	47.9	male	Jennifer Jenson MD	Matthea Gregorio, RDMS	2024-05-10	2960	M	Y
2024-02-24	3452493	311442	1990-05-27 10:34:13	Follow up US	Finalized	Present	2024-03-16	89.6	321.9	322.2	74.7	male	Jennifer Jenson MD	Vicky Martinez, RDMS	2024-02-24	2940	M	Y
2024-02-24	3239984	323198	1992-10-16 22:08:54	Comp Detailed US	Finalized	Present	2024-07-21	46.4	161.9	137.7	31	female	Fred Fredriskson MD	Apoorva Kota, RDMS	2024-07-14	3390	F	Y
2024-02-24	3420535	402200	1988-12-13 19:48:16	Comp Basic US	Finalized	Present	2024-04-20	77.7	277.1	266.5	59.7	female	Jackie Jackson MD	Tania Smith, RDMS	2024-04-15	3150	F	Y
2024-02-24	3467154	425985	1996-05-01 23:51:33	Comp Detailed US	Finalized	Present	2024-04-18	82.3	297.6	288	58.1	male	Jennifer Jenson MD	Jessica Yuan, RDMS	2024-04-14	3235	M	Y
2024-02-24	3390059	982121	1983-06-22 06:45:00	Comp Detailed US	Finalized	Present	2024-07-19	47.4	170.2	140.8	30.3	female	Jennifer Jenson MD	Natalie Serano, RDMS	2024-07-15	3520	F	Y
2024-02-24	3432157	1073520	1999-05-04 04:55:18	Follow up US	Finalized	Present	2024-04-06	82.6	314.2	265.1	59.1	male	Jennifer Jenson MD	Natalie Serano, RDMS	2024-02-29	2290	M	Y
2024-02-24	3454936	1726851	1991-12-13 03:42:11	Comp Detailed US	Finalized	Present	2024-07-19	40.3	156.7	129.4	27.8	male	Jackie Jackson MD	Natalie Serano, RDMS	2024-07-20	2850	M	Y
2024-02-24	3160012	1771642	1990-01-18 14:27:39	Comp Detailed US	Finalized	Present	2024-07-09	45.8	181.6	155.3	35.6	male	Jackie Jackson MD	Estefania Traun, RDMS	2024-07-02	3000	M	Y
2024-02-24	3340019	1849724	1987-06-02 05:41:43	Follow up US	Finalized	Present	2024-06-15	61.1	210.9	189.5	42.1	female	Fred Fredriskson MD	Jessica Yuan, RDMS	2024-04-15	1405	F	Y
2024-02-25	3061421	47548	1991-04-15 06:15:28	Follow up US	Finalized	Present	2024-04-17	72.7	287.8	275.7	58.4		Jackie Jackson MD	Estefania Traun, RDMS	2024-04-03	2750	M	Y
2024-02-25	3433840	901978	1988-05-14 00:16:52	Follow up US	Revised	Present	2024-05-18	68.5	243	236.6	52.6		Fred Fredriskson MD	Vicky Martinez, RDMS	2024-05-20	3570	F	Y
2024-02-25	3310985	1337580	1986-03-26 13:14:31	Follow up US	Finalized	Present	2024-05-18	76.6	272.1	231.6	53.3	male	Jackie Jackson MD	Tania Smith, RDMS	2024-05-11	2960	M	Y
2024-02-25	3338844	1649701	1997-04-13 18:30:56	Follow up US	Finalized	Present	2024-04-14	86.5	310.5	292.3	62.8	female	Jennifer Jenson MD	Jessica Yuan, RDMS	2024-04-11	3350	F	Y
2024-02-25	3366641	1980815	1994-02-15 14:23:26	Comp Detailed US	Finalized	Present	2024-07-29	40.3	157.1	122.8	28.4	male	Jackie Jackson MD	Jessica Yuan, RDMS	2024-07-12	2670	M	Y
2024-02-26	3327958	564786	1988-04-28 01:24:22	Comp Detailed US	Finalized	Present	2024-07-21	48.7	165.2	136.9	32.7	female	Jennifer Jenson MD	Estefania Traun, RDMS	2024-07-14	3450	F	Y
2024-02-26	3285686	690464	1989-09-26 15:14:03	Follow up US	Finalized	Present	2024-04-04	89.8	321.6	300.8	67.4		Jackie Jackson MD	Apoorva Kota, RDMS	2024-03-17	2770	F	Y
2024-02-26	3378486	1251804	1982-03-11 12:41:29	Follow up US	Finalized	Present	2024-04-28	75.8	287.4	256.7	55.3		Fred Fredriskson MD	Estefania Traun, RDMS	2024-03-31	2235	F	Y
2024-02-26	3405001	1419544	1995-07-09 03:45:00	Comp Basic US	Finalized	Present	2024-03-23	86.1	311.1	344.8	71.5	female	Jennifer Jenson MD	Vicky Martinez, RDMS	2024-03-06	3650	F	Y
2024-02-26	3375937	1604439	1991-06-10 05:27:39	Comp Detailed US	Finalized	Present	2024-04-21	79.6	290.5	277.6	62.4	male	Jennifer Jenson MD	Vicky Martinez, RDMS	2024-04-22	3440	M	Y
2024-02-26	3475713	1951274	1988-07-23 22:07:30	Follow up US	Finalized	Present	2024-06-03	62.5	235.7	220.6	50.3	male	Jennifer Jenson MD	Juana Manadeva, RDMS	2024-02-27	875	M	Y
2024-02-27	3186223	159190	1993-11-25 15:57:39	Comp Detailed US	Finalized	Present	2024-07-11	53.6	191.1	168.3	36.3	male	William Wilson MD	Natalie Serano, RDMS	2024-07-01	2860	M	Y
2024-02-27	3431240	447953	1974-11-04 08:59:17	Follow up US	Revised	Present	2024-04-26	81.6	316.2	313.9	65	male	Andrea Anderson MD	Estefania Traun, RDMS	2024-04-12	4155	M	Y
2024-02-27	3482327	1387574	1987-01-11 08:07:58	Follow up US	Finalized	Present	2024-05-11	75.4	282.2	239	56.4	female	Jennifer Jenson MD	Jessica Yuan, RDMS	2024-05-04	3030	F	Y
2024-02-27	3096176	1751702	1991-11-04 02:23:26	Follow up US	Finalized	Present	2024-04-24	78.8	298.1	277.3	61.5	female	William Wilson MD	Natalie Serano, RDMS	2024-04-19	3280	F	Y
2024-02-27	3409079	1959415	1986-07-20 12:26:43	Comp Detailed US	Finalized	Present	2024-07-23	48	168.7	146.6	33.6	male	Andrea Anderson MD	Natalie Serano, RDMS	2024-07-20	2950	M	Y
2024-02-28	3153483	650539	1993-10-21 16:15:56	Comp Detailed US	Finalized	Present	2024-07-22	47.4	168.9	135.6	31.4	female	Jennifer Jenson MD	Estefania Traun, RDMS	2024-07-18	3380	F	Y
2024-02-28	3339508	1411568	1989-12-22 13:28:35	Follow up US	Finalized	Present	2024-04-05	84.5	317.9	319.9	64.1	male	Andrea Anderson MD	Apoorva Kota, RDMS	2024-03-23	3180	M	Y
2024-02-28	3464045	1649701	1997-04-10 18:30:56	Comp Basic US	Finalized	Present	2024-04-12	87.7	323.9	303.1	65.3	female	William Wilson MD	Apoorva Kota, RDMS	2024-04-13	3350	F	Y
2024-02-28	3206839	1656668	1986-10-23 08:55:46	Comp Basic US	Finalized	Present	2024-03-28	91.7	324.8	336.2	70.2	male	Andrea Anderson MD	Jessica Yuan, RDMS	2024-03-23	4270	M	Y
2024-02-28	3394607	1851288	1987-12-24 01:35:37	Follow up US	Finalized	Present	2024-03-14	96.2	345.5	368.2	77	female	William Wilson MD	Estefania Traun, RDMS	2024-03-12	4130	F	Y
2024-02-28	3213579	1954664	1990-06-17 12:30:56	Comp Detailed US	Finalized	Present	2024-07-24	46.2	162.1	144.1	31.1	female	Andrea Anderson MD	Angelica Zunj, RDMS	2024-07-18	3100	F	Y
2024-02-28	3477495	1962104	1990-01-11 14:52:58	Follow up US	Finalized	Present	2024-06-04	61.4	226.9	205.6	42.6	female	William Wilson MD	Jessica Yuan, RDMS	2024-05-31	3070	F	Y
2024-02-29	3414835	92805	1988-02-26 00:54:50	Comp Detailed US	Finalized	Present	2024-07-24	44.8	164.6	142.8	31	female	William Wilson MD	Tania Smith, RDMS	2024-05-07	1210	F	Y
2024-02-29	3267340	94782	1986-02-12 14:26:15	Comp Detailed US	Revised	Present	2024-08-05	42.6	152.2	125.3	21.9	female	William Wilson MD	Vicky Martinez, RDMS	2024-07-13	2540	F	Y
2024-02-29	3459057	180415	1988-05-23 22:48:16	Follow up US	Finalized	Present	2024-03-21	83.7	310.5	305.6	66.9	female	William Wilson MD	Jessica Yuan, RDMS	2024-03-03	2420	F	Y
2024-02-29	3356682	1169371	1987-08-10 03:59:03	Follow up US	Finalized	Present	2024-04-12	87.9	297.5	285.9	67	male	Jennifer Jenson MD	Angelica Zunj, RDMS	2024-03-30	3170	M	Y
2024-02-29	3492278	1492294	1985-08-24 15:39:22	Follow up US	Finalized	Present	2024-04-06	88.6	333	314.2	70.9	female	Jennifer Jenson MD	Tania Smith, RDMS	2024-03-16	2870	F	Y
2024-02-29	3413306	1687357	1991-08-26 03:40:46	Follow up US	Finalized	Present	2024-03-28	87.3	337	331.8	69	male	Jennifer Jenson MD	Tania Smith, RDMS	2024-03-22	3765	M	Y
2024-02-29	3352292	1712040	1993-07-13 16:46:52	Follow up US	Finalized	Present	2024-04-23	86.3	308.8	271.5	60.5	male	Andrea Anderson MD	Angelica Zunj, RDMS	2024-04-18	3200	M	Y
2024-03-01	3364394	39273	1990-03-01 13:32:48	Follow up US	Finalized	Present	2024-05-06	78.3	279.3	255.7	59	male	Jennifer Jenson MD	Vicky Martinez, RDMS	2024-04-27	3240	M	Y
2024-03-01	3417233	391971	1985-05-30 18:49:13	Comp Detailed US	Finalized	Present	2024-08-01	40.2	149.7	135.5	29.3	female	Jackie Jackson MD	Apoorva Kota, RDMS	2024-07-24	3100	F	Y
2024-03-01	3492074	644210	1991-10-12 03:45:00	Comp Basic US	Finalized	Present	2024-05-07	79.7	293.4	279.7	56.5	female	Jennifer Jenson MD	Deepa Yow, RDMS	2024-04-25	3140	F	Y
2024-03-01	3490286	666443	1989-07-04 16:35:37	Follow up US	Finalized	Present	2024-03-16	88.8	327.2	317.8	69.9		Jackie Jackson MD	Jessica Yuan, RDMS	2024-03-20	3230	M	Y
2024-03-01	3333341	879492	1995-06-03 06:35:09	Follow up US	Finalized	Present	2024-06-22	61.2	222.3	202.9	44	male	Jackie Jackson MD	Apoorva Kota, RDMS	2024-06-22	3410	M	Y
2024-03-01	3485179	1147959	2003-11-09 10:24:22	Follow up US	Finalized	Present	2024-03-26	96.4	340.4	332.9	69.2	male	Jennifer Jenson MD	Apoorva Kota, RDMS	2025-07-24	3250	F	Y
2024-03-01	3486968	1262709	1983-09-12 03:14:03	Follow up US	Finalized	Present	2024-06-09	60.9	216.2	186.6	45.7	female	Jennifer Jenson MD	Angelica Zunj, RDMS	2024-02-29	660	F	Y
2024-03-01	3495953	1497839	1999-02-22 09:00:00	Comp Detailed US	Finalized	Present	2024-07-27	41.4	153.7	126.5	28.2	female	Jennifer Jenson MD	Natalie Serano, RDMS	2024-07-18	3080	F	Y
2024-03-01	3270401	1948298	1991-08-26 05:15:00	Comp Detailed US	Finalized	Present	2024-07-30	38.6	152.3	130.9	23.9	female	Jackie Jackson MD	Apoorva Kota, RDMS	2024-07-08	2270	F	Y
2024-03-02	3377567	754414	1991-11-13 04:11:43	Comp Detailed US	Finalized	Present	2024-07-19	52	178.2	160	35.2	female	William Wilson MD	Tania Smith, RDMS	2024-07-13	4370	F	Y
2024-03-02	3442623	766914	1992-09-21 20:33:16	Follow up US	Finalized	Present	2024-03-28	85.1	308.7	317.7	66.7		William Wilson MD	Jessica Yuan, RDMS	2024-03-12	2845	F	Y
2024-03-02	3489271	846030	1988-07-30 22:41:15	Comp Basic US	Finalized	Present	2024-06-02	73.5	276.2	224.1	53.7	male	Jackie Jackson MD	Natalie Serano, RDMS	2024-05-23	3490	M	Y
2024-03-02	3215721	1473046	1986-08-14 09:50:37	Follow up US	Finalized	Present	2024-04-26	80.8	296	285.6	57.7	female	Jackie Jackson MD	Natalie Serano, RDMS	2024-04-19	3060	F	Y
2024-03-02	3368841	1645837	1988-04-25 23:48:45	Follow up US	Finalized	Present	2024-04-21	89.1	313.3	292.6	67.7	male	William Wilson MD	Vicky Martinez, RDMS	2024-04-20	3310	M	Y
2024-03-02	3487632	1998297	1990-06-20 10:45:28	Follow up US	Finalized	Present	2024-04-30	82.3	304.8	266.3	58.7	female	Jennifer Jenson MD	Jessica Yuan, RDMS	2024-04-18	3410	F	Y
2024-03-03	3500887	485490	1989-02-24 19:10:18	Comp Basic US	Finalized	Present	2024-05-03	70.8	265.9	242.8	57.2	female	Jennifer Jenson MD	Leticia Castro, RDMS	2024-04-27	2490	F	Y
2024-03-03	3356066	1534807	1989-08-28 17:58:35	Comp Detailed US	Finalized	Present	2024-07-29	44.2	166.7	142	26.3	male	Jackie Jackson MD	Jessica Yuan, RDMS	2024-07-29	3360	M	Y
2024-03-03	3411271	1745326	1998-12-15 07:56:43	Follow up US	Finalized	Present	2024-03-23	85.8	315.2	323.2	69.3	female	William Wilson MD	Natalie Serano, RDMS	2024-03-18	3090	F	Y
2024-03-04	3408619	858643	1994-04-13 13:37:01	Comp Detailed US	Finalized	Present	2024-07-29	42.6	161.7	143	30.4	male	Jackie Jackson MD	Apoorva Kota, RDMS	2024-07-24	3090	M	Y
2024-03-04	3370886	1223456	1996-04-13 09:18:16	Follow up US	Finalized	Present	2024-06-23	55.7	214.4	198	40.7	male	William Wilson MD	Apoorva Kota, RDMS	2025-09-26	2930	F	Y
2024-03-04	3372112	1339519	1985-01-14 20:24:50	Follow up US	Finalized	Present	2024-06-28	56.7	219.7	198.1	41.3	male	William Wilson MD	Natalie Serano, RDMS	2024-06-14	3270	M	Y
2024-03-05	3245022	182879	1991-07-11 06:05:37	Comp Detailed US	Finalized	Present	2024-07-19	47.7	176.1	156.5	33.2	male	William Wilson MD	Angelica Zunj, RDMS	2024-06-18	2790	M	Y
2024-03-05	3117025	1633300	1988-11-16 21:09:50	Follow up US	Finalized	Present	2024-05-02	80.6	293.6	290	64	male	William Wilson MD	Apoorva Kota, RDMS	2024-05-09	3250	M	Y
2024-03-05	3457128	1765351	1987-12-05 02:54:22	Comp Basic US	Finalized	Present	2024-05-30	70.6	263.1	230.6	55	male	William Wilson MD	Natalie Serano, RDMS	2024-05-11	2570	M	Y
2024-03-06	3409027	83862	1995-07-19 06:02:48	Comp Detailed US	Finalized	Present	2024-07-29	46.4	174.3	142.1	32.2	female	Andrea Anderson MD	Vicky Martinez, RDMS	2024-07-30	3750	F	Y
2024-03-06	3154249	121011	1983-09-25 02:40:18	Follow up US	Finalized	Present	2024-04-04	87.9	322.8	315.8	75.9	male	Andrea Anderson MD	Vicky Martinez, RDMS	2024-03-21	3290	M	Y
2024-03-06	3314740	370817	1997-08-09 17:52:58	Comp Detailed US	Revised	Present	2024-07-30	45.3	158.7	131.4	30.1	male	Fred Fredriskson MD	Estefania Traun, RDMS	2024-08-03	2880	M	Y
2024-03-06	3451833	933264	1990-08-22 11:05:09	Comp Detailed US	Finalized	Present	2024-07-22	46.7	164.7	137.1	30.9	male	Fred Fredriskson MD	Vicky Martinez, RDMS	2024-06-14	1460	M	Y
2024-03-06	3384139	1203843	1990-03-08 14:13:35	Comp Detailed US	Finalized	Present	2024-08-05	40.9	149.6	125.8	27.4	female	William Wilson MD	Apoorva Kota, RDMS	2024-07-29	3290	F	Y
2024-03-07	3422067	346510	1988-06-14 22:24:22	Comp Basic US	Finalized	Present	2024-03-30	85.7	320.8	301.9	71.3		Fred Fredriskson MD	Deepa Yow, RDMS	2024-03-26	3200	M	Y
2024-03-07	3471278	813944	2000-10-23 21:40:46	Follow up US	Finalized	Present	2024-05-22	69.4	273.5	256.4	58.2		Andrea Anderson MD	Apoorva Kota, RDMS	2024-05-26	3515	M	Y
2024-03-07	3419215	1793189	1992-03-13 02:02:20	Comp Detailed US	Finalized	Present	2024-07-30	47.5	179.9	158.4	35	male	Fred Fredriskson MD	Tania Smith, RDMS	2024-07-24	4000	M	Y
2024-03-08	3495597	279646	1993-02-27 19:35:37	Follow up US	Finalized	Present	2024-06-01	78	279.2	229.2	52.4	male	Jackie Jackson MD	Natalie Serano, RDMS	2024-05-17	2840	M	Y
2024-03-08	3509140	387242	1992-12-23 19:59:31	Follow up US	Revised	Present	2024-04-13	85.5	319	311.1	64.1	female	William Wilson MD	Tania Smith, RDMS	2024-03-17	2660	F	Y
2024-03-08	3489322	738325	1997-03-11 18:26:43	Follow up US	Finalized	Present	2024-03-16	93.6	340.8	341.7	75.8	male	Jackie Jackson MD	Tania Smith, RDMS	2024-03-17	3520	M	Y
2024-03-08	3355047	1261634	1988-11-11 21:57:39	Comp Detailed US	Finalized	Present	2024-08-06	41.8	155.5	125.6	26.3	female	Andrea Anderson MD	Apoorva Kota, RDMS	2024-07-19	2800	F	Y
2024-03-08	3511678	1304696	1988-10-01 22:17:20	Comp Basic US	Finalized	Present	2024-06-04	72.2	262.2	237.5	54.3	male	Jackie Jackson MD	Tania Smith, RDMS	2024-05-26	3380	M	Y
2024-03-08	3492227	1308088	1988-05-15 00:23:54	Comp Basic US	Finalized	Present	2024-05-25	77.8	280.6	259.8	58.1	female	Fred Fredriskson MD	Apoorva Kota, RDMS	2024-05-22	3210	F	Y
2024-03-08	3427108	1373529	1990-07-15 12:14:03	Comp Detailed US	Finalized	Present	2024-07-28	44.9	168.1	138.8	30.2	female	Fred Fredriskson MD	Angelica Zunj, RDMS	2024-07-06	2520	F	Y
2024-03-09	3509089	61329	2000-06-11 23:47:20	Comp Detailed US	Finalized	Present	2024-06-30	56.9	220	192.6	43.3	female	Fred Fredriskson MD	Vicky Martinez, RDMS	2024-06-21	3790	F	Y
2024-03-09	3487836	447953	1974-10-12 08:59:17	Comp Basic US	Finalized	Present	2024-04-26	86.5	325.8	346.3	63.8	male	William Wilson MD	Apoorva Kota, RDMS	2024-04-14	4155	M	Y
2024-03-09	3514127	877275	1994-07-17 10:07:30	Comp Basic US	Finalized	Present	2024-04-04	87.3	322.1	307.9	68.5	female	Jackie Jackson MD	Jessica Yuan, RDMS	2024-03-27	2640	F	Y
2024-03-09	3290104	1418855	1990-06-22 12:14:03	Fetal Echo	Finalized	Present	2024-07-04	59.1	210.7	189.4	42.4		Fred Fredriskson MD	Vicky Martinez, RDMS	2024-06-16	3000	F	Y
2024-03-10	3534930	73924	1976-02-06 02:48:02	Comp Basic US	Revised	Present	2024-06-26	58.6	229.4	207.1	42.2	male	Jackie Jackson MD	Apoorva Kota, RDMS	2024-06-23	3120	M	Y
2024-03-10	3526352	108836	1990-08-13 10:27:11	Follow up US	Finalized	Present	2024-04-24	79.6	306.1	286.6	66.6		Fred Fredriskson MD	Juana Manadeva, RDMS	2024-04-06	2665	F	Y
2024-03-10	3399085	1010474	1988-10-19 20:52:58	Follow up US	Finalized	Present	2024-04-02	94.4	341.8	327.6	67.2		Jackie Jackson MD	Vicky Martinez, RDMS	2024-04-03	3760	M	Y
2024-03-10	3495494	1301387	1990-10-07 08:38:54	Follow up US	Finalized	Present	2024-04-08	89.4	322.4	313.2	66.1		Fred Fredriskson MD	Estefania Traun, RDMS	2024-03-31	3100	M	Y
2024-03-10	3480855	1782408	1985-03-31 19:53:54	Comp Detailed US	Finalized	Present	2024-07-31	41.4	164.6	145.8	29.4	male	William Wilson MD	Natalie Serano, RDMS	2024-07-23	2850	F	Y
2024-03-10	3096227	1787134	1988-02-25 00:59:03	Comp Basic US	Finalized	Present	2024-05-05	80.8	295.4	286.1	63.7		Fred Fredriskson MD	Jessica Yuan, RDMS	2024-04-10	3090	F	Y
2024-03-11	3517633	1344970	1996-02-26 01:45:28	Comp Basic US	Finalized	Present	2024-05-31	73	262	221.6	49.3	male	Fred Fredriskson MD	Jessica Yuan, RDMS	2024-06-01	2810	M	Y
2024-03-12	3277643	798479	1983-11-07 03:11:15	Follow up US	Finalized	Present	2024-06-03	69.4	268.1	239	53	male	Jennifer Jenson MD	Angelica Zunj, RDMS	2024-06-02	3710	M	Y
2024-03-13	3540943	620580	1990-05-26 10:59:31	Follow up US	Finalized	Present	2024-03-26	91.3	333.9	350.7	74.4		Fred Fredriskson MD	Apoorva Kota, RDMS	2024-03-20	3970	M	Y
2024-03-14	3550572	157125	1994-06-22 11:19:13	Follow up US	Finalized	Present	2024-05-21	74.5	273.4	239	54.8		Jennifer Jenson MD	Apoorva Kota, RDMS	2024-05-10	2960	M	Y
2024-03-14	3427772	370443	1988-04-23 00:30:56	Follow up US	Finalized	Present	2024-06-06	73.5	273.3	237	55.2	male	Jennifer Jenson MD	Estefania Traun, RDMS	2024-05-31	2920	M	Y
2024-03-14	2889581	1041206	1988-05-12	Follow up US	Finalized	Present	2024-05-10	82.4	296.3	269.5	60.8	male	Jennifer Jenson MD	Angelica Zunj, RDMS	2024-04-26	3145	M	Y
2024-03-14	3425634	1541542	1984-04-19 01:04:41	Follow up US	Finalized	Present	2024-06-06	76.6	274.3	241	50.5	male	William Wilson MD	Jessica Yuan, RDMS	2024-05-16	2990	M	Y
2024-03-14	3292793	1570582	1991-05-24 06:19:41	Follow up US	Finalized	Present	2024-05-09	85.5	300.4	272.9	65.1	male	Jennifer Jenson MD	Vicky Martinez, RDMS	2024-05-18	3500	M	Y
2024-03-15	3519725	285322	1999-02-24 07:59:31	Follow up US	Finalized	Present	2024-06-21	70	254.3	213.5	46.1	male	William Wilson MD	Natalie Serano, RDMS	2024-05-31	3270	M	Y
2024-03-15	3435727	544555	1984-07-26 22:17:20	Follow up US	Finalized	Present	2024-04-14	80.8	305.1	328.1	64.8	female	William Wilson MD	Natalie Serano, RDMS	2024-04-12	3400	F	Y
2024-03-15	3437266	787342	1994-01-17 13:30:00	Follow up US	Finalized	Present	2024-04-12	83.5	317.4	318.7	70.8		Fred Fredriskson MD	Estefania Traun, RDMS	2024-04-11	3160	F	Y
2024-03-15	3548076	835341	1998-09-11 09:16:52	Follow up US	Finalized	Present	2024-04-09	95.4	329.8	324.6	68.6		Jennifer Jenson MD	Apoorva Kota, RDMS	2024-04-12	3610	M	Y
2024-03-15	3305956	1370064	1991-12-26 03:07:01	Follow up US	Finalized	Present	2024-06-05	69.3	265.4	241.3	53.3		Fred Fredriskson MD	Apoorva Kota, RDMS	2024-05-27	3340	M	Y
2024-03-15	3207913	1880288	1988-09-28 21:43:35	Follow up US	Finalized	Present	2024-05-04	84.6	306.9	292.2	65.5	male	Jennifer Jenson MD	Natalie Serano, RDMS	2024-04-26	2650	M	Y
2024-03-16	3155010	186385	1990-02-24 13:31:24	Comp Basic US	Revised	Present	2024-06-22	57.3	234.9	193.7	49.2	female	Jennifer Jenson MD	Estefania Traun, RDMS	2024-06-14	3020	F	Y
2024-03-16	3564929	563915	1983-06-16 07:30:00	Comp Detailed US	Finalized	Present	2024-08-10	44.7	162.6	141.7	32.5	male	Jennifer Jenson MD	Deepa Yow, RDMS	2024-08-07	3470	M	Y
2024-03-16	3491104	1242850	1990-08-03 09:39:22	Comp Basic US	Finalized	Present	2024-04-04	90.6	335.1	334.1	71.2	female	Jennifer Jenson MD	Apoorva Kota, RDMS	2024-03-30	3040	F	Y
2024-03-16	2824238	1411568	1989-12-26 13:28:35	Follow up US	Finalized	Present	2024-04-07	84.8	326.5	359.5	70.3		William Wilson MD	Estefania Traun, RDMS	2024-03-23	3180	M	Y
2024-03-16	3550317	1622369	1989-12-03 13:35:37	Comp Basic US	Finalized	Present	2024-05-24	76.7	273.9	250.6	58	male	Fred Fredriskson MD	Vicky Martinez, RDMS	2024-03-16	1520	M	Y
2024-03-16	2903174	1662262	1988-11-03 20:31:52	Follow up US	Finalized	Present	2024-05-10	86.7	320.9	300.9	60.2	male	Fred Fredriskson MD	Apoorva Kota, RDMS	2024-04-27	3260	M	Y
2024-03-16	3434554	1680951	1985-03-31 19:20:09	Follow up US	Finalized	Present	2024-07-07	59.1	221.1	186.9	43.2	female	Jennifer Jenson MD	Jessica Yuan, RDMS	2024-06-29	3480	F	Y
2024-03-16	2885445	1838700	1980-12-29 19:58:07	Follow up US	Finalized	Present	2024-05-11	79.4	298.7	286.4	60.6	female	Jennifer Jenson MD	Natalie Serano, RDMS	2024-05-12	3460	F	Y
2024-03-17	3472348	47548	1991-03-08 06:15:28	Follow up US	Finalized	Present	2024-04-17	82.1	306.4	302.5	70.3		Fred Fredriskson MD	Apoorva Kota, RDMS	2024-04-05	2750	M	Y
2024-03-17	3569562	259659	2005-12-16 14:26:15	Follow up US	Finalized	Present	2024-04-25	78.2	297.4	271.4	64.4		Fred Fredriskson MD	Matthea Gregorio, RDMS	2024-04-20	2930	M	Y
2024-03-17	3341445	1314698	1993-01-13 21:50:37	Comp Detailed US	Finalized	Present	2024-08-14	41.5	152.6	130.9	25.9	female	William Wilson MD	Jessica Yuan, RDMS	2024-08-05	3510	F	Y
2024-03-17	3319211	1620563	1981-07-01 19:02:34	Comp Detailed US	Finalized	Present	2024-08-07	51.3	182.4	152.3	34.1	male	Jennifer Jenson MD	Estefania Traun, RDMS	2024-07-31	4260	M	Y
2024-03-17	3504654	1876196	1990-03-24 14:19:13	Follow up US	Finalized	Present	2024-07-15	54.1	197.5	175.5	43.1		William Wilson MD	Vicky Martinez, RDMS	2024-07-05	2830	F	Y
2024-03-18	3202957	555132	1991-11-22 03:08:26	Follow up US	Finalized	Present	2024-05-09	79.8	299.9	274.4	62.9	female	William Wilson MD	Natalie Serano, RDMS	2024-05-04	2990	F	Y
2024-03-18	3432974	707705	1991-03-14 06:32:20	Follow up US	Finalized	Present	2024-04-11	90.2	331.1	333.4	76.9	male	William Wilson MD	Vicky Martinez, RDMS	2024-03-28	3490	M	Y
2024-03-18	3473931	1251804	1982-03-19 12:41:29	Follow up US	Finalized	Present	2024-04-28	82	307.8	271.7	69.3		Fred Fredriskson MD	Vicky Martinez, RDMS	2024-03-31	2235	F	Y
2024-03-19	3462266	440316	1993-02-21 19:08:54	Follow up US	Finalized	Present	2024-05-08	76.8	292.6	278	67.4	female	Andrea Anderson MD	Natalie Serano, RDMS	2024-04-16	1985	F	Y
2024-03-19	3361783	854451	1989-08-16 17:34:41	Comp Detailed US	Finalized	Present	2024-08-14	42.4	167	147.6	31.3	female	Andrea Anderson MD	Apoorva Kota, RDMS	2024-08-09	3765	F	Y
2024-03-19	3525025	1656668	1986-10-26 08:55:46	Follow up US	Finalized	Present	2024-03-26	94	339	362.3	78.5		Jennifer Jenson MD	Jessica Yuan, RDMS	2024-03-23	4270	M	Y
2024-03-20	3429920	535702	1995-02-23 16:42:39	Comp Detailed US	Revised	Present	2024-08-15	46.3	164.6	141.8	32.5	female	Andrea Anderson MD	Jessica Yuan, RDMS	2025-12-16	3420	M	Y
2024-03-20	3529517	1018331	1989-03-20 20:00:56	Comp Detailed US	Finalized	Present	2024-08-11	45.4	168.2	139.9	32	male	Jennifer Jenson MD	Jessica Yuan, RDMS	2024-07-26	3120	M	Y
2024-03-20	3565184	1955518	1989-03-02 19:27:11	Follow up US	Finalized	Present	2024-05-17	82.3	305.9	275	62.7		Fred Fredriskson MD	Jessica Yuan, RDMS	2024-05-14	3060	F	Y
2024-03-21	3539365	147707	1996-06-01 01:11:43	Comp Detailed US	Finalized	Present	2024-08-10	47	173.1	156.2	28.5	male	Jennifer Jenson MD	Jessica Yuan, RDMS	2024-07-13	2700	M	Y
2024-03-21	3447453	1194127	1983-05-05 07:06:05	Follow up US	Finalized	Present	2024-06-29	63.4	238.4	199.7	49.2	male	Fred Fredriskson MD	Vicky Martinez, RDMS	2024-06-18	2780	M	Y
2024-03-21	3332020	1408704	1997-02-22 20:47:20	Comp Detailed US	Revised	Present	2024-08-22	41	154.3	119.4	28.3	male	Jackie Jackson MD	Apoorva Kota, RDMS	2024-07-29	2810	M	Y
2024-03-21	3235244	1454695	1988-11-14 22:34:13	Comp Detailed US	Finalized	Present	2024-08-16	43	159.8	141.2	30.3	female	Jennifer Jenson MD	Apoorva Kota, RDMS	2024-08-03	3020	F	Y
2024-03-21	3476119	1962104	1989-12-09 14:52:58	Follow up US	Finalized	Present	2024-06-05	72.8	256.3	238.2	56.3	female	Andrea Anderson MD	Vicky Martinez, RDMS	2024-05-30	3070	F	Y
2024-03-22	3044029	121195	1990-10-06 10:10:18	Follow up US	Finalized	Present	2024-06-15	70.1	258	230.1	57.8		Fred Fredriskson MD	Estefania Traun, RDMS	2024-06-09	3420	F	Y
2024-03-22	3460892	402200	1989-01-24 19:48:16	Follow up US	Finalized	Present	2024-04-21	85.8	318.6	306.5	68.2	female	Jackie Jackson MD	Estefania Traun, RDMS	2024-04-13	3150	F	Y
2024-03-22	3524260	901978	1988-05-19 00:16:52	Follow up US	Revised	Present	2024-05-17	79.9	281.8	269.2	62.2		Andrea Anderson MD	Vicky Martinez, RDMS	2024-05-19	3570	F	Y
2024-03-22	3443287	1140045	1989-10-10 16:39:50	Comp Detailed US	Finalized	Present	2024-08-16	46.5	168.2	138.1	28.3	male	Jennifer Jenson MD	Tania Smith, RDMS	2024-08-09	3180	M	Y
2024-03-22	3482225	1310238	1983-09-06 03:37:58	Follow up US	Finalized	Present	2024-04-20	93.6	315	314	66.3	female	Andrea Anderson MD	Angelica Zunj, RDMS	2024-04-05	2960	F	Y
2024-03-22	3525434	1376435	1989-02-26 19:49:41	Follow up US	Finalized	Present	2024-05-05	78.5	287.6	283	62.1		Fred Fredriskson MD	Jessica Yuan, RDMS	2024-05-12	3455	F	Y
2024-03-22	3424666	1543187	1990-09-11 11:26:15	Comp Detailed US	Finalized	Present	2024-08-14	41.7	157.6	133	31.8	female	Jennifer Jenson MD	Tania Smith, RDMS	2024-08-11	3475	F	Y
2024-03-22	3583728	1849724	1987-04-14 05:41:43	Follow up US	Finalized	Present	2024-06-13	70.3	253.2	222.9	54.3	female	Jackie Jackson MD	Jessica Yuan, RDMS	2024-04-14	1405	F	Y
2024-03-22	3492835	1929953	1989-12-03 15:40:46	Follow up US	Finalized	Present	2024-07-08	59.1	223.8	213.3	49	female	Jennifer Jenson MD	Tania Smith, RDMS	2024-06-20	3140	F	Y
2024-03-23	2841632	333634	1993-07-28 15:49:13	Follow up US	Finalized	Present	2024-04-16	90.4	314.2	304	71	male	Jackie Jackson MD	Vicky Martinez, RDMS	2024-04-05	2980	M	Y
2024-03-23	3338228	616004	1993-07-22 18:07:01	Comp Detailed US	Finalized	Present	2024-08-16	40.9	166	139.6	31.5	female	Jackie Jackson MD	Estefania Traun, RDMS	2024-08-05	2900	F	Y
2024-03-23	3259954	649562	1991-04-18 08:12:11	Comp Detailed US	Finalized	Present	2024-08-14	42.8	163.2	142.9	33.1	female	Jackie Jackson MD	Apoorva Kota, RDMS	2024-08-06	3120	F	Y
2024-03-23	3555658	1169371	1987-07-27 03:59:03	Follow up US	Finalized	Present	2024-04-13	97.9	327.4	323.6	69.5		Fred Fredriskson MD	Natalie Serano, RDMS	2024-03-29	3170	M	Y
2024-03-23	3468426	1337580	1987-06-13 13:14:31	Follow up US	Finalized	Present	2024-05-19	86	304.5	272.5	62.7		Fred Fredriskson MD	Natalie Serano, RDMS	2025-08-23	3420	F	Y
2024-03-23	3482836	1387574	1986-12-21 08:07:58	Follow up US	Finalized	Present	2024-05-13	87.8	312.9	278.9	64.7	female	Jackie Jackson MD	Apoorva Kota, RDMS	2024-05-02	3030	F	Y
2024-03-23	3564726	1649701	1997-02-28 18:30:56	Follow up US	Finalized	Present	2024-04-12	82.9	334.1	328.2	71.6		Jennifer Jenson MD	Vicky Martinez, RDMS	2024-04-12	3350	F	Y
2024-03-23	3457837	1709312	1995-12-09 02:23:26	Follow up US	Finalized	Present	2024-04-23	85.5	312.8	312.5	72.7	female	Jackie Jackson MD	Tania Smith, RDMS	2024-04-10	3250	F	Y
2024-03-23	3338484	1771642	1990-01-19 14:27:39	Follow up US	Finalized	Present	2024-07-10	63.5	221.2	195.6	47.1		Fred Fredriskson MD	Vicky Martinez, RDMS	2024-07-03	3000	M	Y
2024-03-24	3592565	913601	1993-12-18 15:00:00	Comp Basic US	Finalized	Present	2024-06-08	75.8	283.1	263.4	59	male	Jackie Jackson MD	Apoorva Kota, RDMS	2024-05-30	3250	M	Y
2024-03-24	3387251	1042086	1987-01-23 09:02:48	Comp Detailed US	Finalized	Present	2024-08-12	49.7	183.1	168.5	32.6	male	Jennifer Jenson MD	Vicky Martinez, RDMS	2024-08-07	3990	M	Y
2024-03-24	3469648	1069890	1990-02-18 14:43:07	Follow up US	Finalized	Present	2024-07-06	61.7	224.5	191.3	47.5		Fred Fredriskson MD	Jessica Yuan, RDMS	2024-06-29	2420	M	Y
2024-03-24	3409795	1415095	1985-06-20 19:22:58	Comp Detailed US	Finalized	Present	2024-08-16	49.6	171.8	156.1	27.2	male	Fred Fredriskson MD	Natalie Serano, RDMS	2024-08-03	4030	M	Y
2024-03-24	3248391	1418634	1987-01-29 08:37:30	Comp Detailed US	Finalized	Present	2024-08-17	43.5	159.5	130.3	28.6	female	Fred Fredriskson MD	Jessica Yuan, RDMS	2024-07-26	2550	F	Y
2024-03-25	3565743	182879	1991-05-31 06:05:37	Follow up US	Finalized	Present	2024-07-19	57	212.7	191.6	40	male	Jennifer Jenson MD	Vicky Martinez, RDMS	2024-06-17	2790	M	Y
2024-03-25	3485744	1542144	1990-04-22 13:56:43	Comp Detailed US	Finalized	Present	2024-08-13	48.5	168.4	136.6	32.4	female	Jennifer Jenson MD	Angelica Zunj, RDMS	2024-08-07	3520	F	Y
2024-03-26	3300804	455976	1984-09-14 23:47:20	Comp Detailed US	Finalized	Present	2024-08-18	41.3	157.6	132.4	26.3	male	William Wilson MD	Natalie Serano, RDMS	2024-08-10	2640	M	Y
2024-03-26	3405256	1370060	1995-11-30 04:25:46	Comp Detailed US	Finalized	Present	2024-08-29	44.4	154.9	127.1	24	female	William Wilson MD	Jessica Yuan, RDMS	2024-08-25	3160	F	Y
2024-03-27	3465524	151728	1982-05-20 13:48:59	Comp Detailed US	Finalized	Present	2024-08-21	49.4	180.4	145.3	29.7	female	William Wilson MD	Natalie Serano, RDMS	2024-08-15	3605	F	Y
2024-03-27	3534574	356346	1990-04-05 14:06:33	Comp Detailed US	Finalized	Present	2024-08-22	40.5	161.9	133.6	31.3	female	Jennifer Jenson MD	Vicky Martinez, RDMS	2024-08-15	3140	F	Y
2024-03-27	3245634	1284073	1992-08-06 22:25:46	Follow up US	Finalized	Present	2024-05-23	81.8	286.5	279.7	60.2	male	William Wilson MD	Jessica Yuan, RDMS	2024-05-11	3300	M	Y
2024-03-28	3558411	391971	1985-06-12 18:49:13	Follow up US	Finalized	Present	2024-08-01	53.9	195.5	172.8	39.6	female	William Wilson MD	Angelica Zunj, RDMS	2024-07-25	3100	F	Y
2024-03-28	3214244	447953	1974-09-26 08:59:17	Follow up US	Finalized	Present	2024-04-27	92.1	343.9	373.3	73.4	male	Jennifer Jenson MD	Natalie Serano, RDMS	2024-04-12	4155	M	Y
2024-03-28	3571285	1041206	1988-04-28	Follow up US	Finalized	Present	2024-05-11	87.5	310.7	287.1	66.4	male	Jennifer Jenson MD	Angelica Zunj, RDMS	2024-04-27	3145	M	Y
2024-03-28	3034663	1473046	1986-08-20 09:50:37	Follow up US	Finalized	Present	2024-04-27	90.1	322.6	325.3	70.7	female	Jackie Jackson MD	Estefania Traun, RDMS	2024-04-19	3060	F	Y
2024-03-28	3492583	1557920	1990-02-19 14:30:28	Follow up US	Finalized	Present	2024-06-25	80	278	247	55.7	male	William Wilson MD	Vicky Martinez, RDMS	2024-06-28	4130	M	Y
2024-03-28	3569411	1972935	1985-06-01 18:25:18	Comp Detailed US	Finalized	Present	2024-08-13	47.7	182.6	154.4	34.6	female	Jennifer Jenson MD	Jessica Yuan, RDMS	2024-07-14	2620	F	Y
2024-03-28	3513216	1989468	1985-03-16 19:41:15	Comp Detailed US	Finalized	Present	2024-08-22	41	158.2	137.2	26.8	female	Jennifer Jenson MD	Tania Smith, RDMS	2024-07-10	2080	F	Y
2024-03-29	3494011	39273	1990-01-01 13:32:48	Follow up US	Finalized	Present	2024-05-05	84.9	304.3	293.1	67.4	male	William Wilson MD	Vicky Martinez, RDMS	2024-04-27	3240	M	Y
2024-03-29	3301112	109345	2002-06-04 13:21:33	Comp Detailed US	Finalized	Present	2024-08-16	48.4	174.9	148.3	31.4	male	Jennifer Jenson MD	Jessica Yuan, RDMS	2024-07-31	2680	M	Y
2024-03-29	3376192	664593	1988-10-02 23:43:07	Comp Detailed US	Finalized	Present	2024-08-22	45.1	167.8	133.6	28.1	male	Jennifer Jenson MD	Apoorva Kota, RDMS	2024-08-17	3495	M	Y
2024-03-29	3465422	879492	1995-06-11 06:35:09	Follow up US	Finalized	Present	2024-06-22	72.9	273.2	240.3	55	male	Jennifer Jenson MD	Angelica Zunj, RDMS	2024-06-23	3410	M	Y
2024-03-29	3533143	1344970	1996-03-02 01:45:28	Follow up US	Finalized	Present	2024-05-31	86.4	284.7	257.2	59.6		Jennifer Jenson MD	Vicky Martinez, RDMS	2024-06-01	2810	M	Y
2024-03-29	3532227	1787134	1988-01-31 00:59:03	Follow up US	Finalized	Present	2024-05-07	91.6	323.6	335.7	72.9		Jackie Jackson MD	Tania Smith, RDMS	2024-04-10	3090	F	Y
2024-03-30	3628755	485490	1989-02-10 19:10:18	Follow up US	Finalized	Present	2024-05-04	82.5	293.6	284.1	61.4		Jennifer Jenson MD	Leticia Castro, RDMS	2024-04-27	2490	F	Y
2024-03-30	3494828	644210	1991-09-08 03:45:00	Follow up US	Finalized	Present	2024-05-09	84.7	313.6	313.3	65.4	female	William Wilson MD	Natalie Serano, RDMS	2024-04-26	3140	F	Y
2024-03-30	3214752	813944	2000-11-10 21:40:46	Follow up US	Finalized	Present	2024-05-22	82.6	303.1	277.6	63.6		William Wilson MD	Jessica Yuan, RDMS	2024-05-25	3515	M	Y
2024-03-30	3399289	1010474	1988-10-06 20:52:58	Follow up US	Finalized	Present	2024-04-03	97.1	353	357.4	75.9		William Wilson MD	Apoorva Kota, RDMS	2024-04-03	3760	M	Y
2024-03-30	3501293	1223456	1996-03-11 09:18:16	Follow up US	Finalized	Present	2024-06-25	68.9	260.4	240.7	51	male	William Wilson MD	Natalie Serano, RDMS	2025-09-27	2930	F	Y
2024-03-30	3502817	1301387	1990-10-04 08:38:54	Follow up US	Finalized	Present	2024-04-06	90.6	314.9	323	76.4		Jackie Jackson MD	Vicky Martinez, RDMS	2024-04-01	3100	M	Y
2024-03-30	3573435	1497839	1999-02-02 09:00:00	Follow up US	Finalized	Present	2024-07-28	52	196.4	175.3	41.4	female	Jackie Jackson MD	Apoorva Kota, RDMS	2024-07-17	3080	F	Y
2024-03-30	3530642	1619653	1987-08-26 04:59:31	Comp Basic US	Finalized	Present	2024-06-22	73.9	268.3	252.4	52.3	female	Jennifer Jenson MD	Apoorva Kota, RDMS	2024-06-02	3045	F	Y
2024-03-31	3495851	846030	1988-09-06 22:41:15	Follow up US	Finalized	Present	2024-06-03	84.2	303.9	277.8	58.4	male	Jennifer Jenson MD	Jessica Yuan, RDMS	2024-05-23	3490	M	Y
2024-03-31	3407044	1149788	1990-05-09 14:13:35	Comp Detailed US	Finalized	Present	2024-08-23	44.7	161.3	135.9	29.4	male	Jennifer Jenson MD	Vicky Martinez, RDMS	2024-08-19	3465	M	Y
2024-03-31	3498753	1645837	1988-05-24 23:48:45	Follow up US	Finalized	Present	2024-04-22	96.6	340.2	322.2	74.9	male	Jackie Jackson MD	Jessica Yuan, RDMS	2024-04-21	3310	M	Y
2024-03-31	3514432	1751702	1991-12-28 02:23:26	Follow up US	Finalized	Present	2024-04-22	89.8	322.9	319.2	72.2	female	Jennifer Jenson MD	Jessica Yuan, RDMS	2024-04-19	3280	F	Y
2024-04-01	3295592	198910	1988-07-11 23:19:13	Follow up US	Finalized	Present	2024-05-27	84.6	313.3	274.3	65.1	female	Jennifer Jenson MD	Estefania Traun, RDMS	2024-05-09	2740	F	Y
2024-04-01	3295541	438742	1984-04-20 00:45:00	Comp Basic US	Finalized	Present	2024-06-10	74.7	280.5	243.7	56.7	male	William Wilson MD	Estefania Traun, RDMS	2024-06-06	2920	M	Y
2024-04-01	3373386	1625134	1993-05-04 19:46:52	Comp Detailed US	Finalized	Present	2024-08-16	50.4	182.1	175.8	37.6	male	Jackie Jackson MD	Estefania Traun, RDMS	2024-07-21	3690	M	Y
2024-04-02	3500576	1339519	1985-01-16 20:24:50	Follow up US	Finalized	Present	2024-06-29	72.3	266.4	227.6	53.4	male	Jennifer Jenson MD	Deepa Yow, RDMS	2024-06-14	3270	M	Y
2024-04-02	3235809	1512966	1995-03-24 07:30:00	Follow up US	Finalized	Present	2024-05-28	87.9	334.9	310	67.5	male	William Wilson MD	Apoorva Kota, RDMS	2024-05-24	4315	M	Y
2024-04-02	3509799	1765351	1987-11-28 02:54:22	Follow up US	Finalized	Present	2024-05-29	77.4	291.2	268.4	60.2	male	Jennifer Jenson MD	Deepa Yow, RDMS	2024-05-11	2570	M	Y
2024-04-03	3637112	157125	1994-07-14 11:19:13	Follow up US	Finalized	Present	2024-05-21	78.4	296.7	261.9	64.4		William Wilson MD	Jessica Yuan, RDMS	2024-05-10	2960	M	Y
2024-04-03	3615905	356357	1993-07-14 17:24:50	Comp Basic US	Finalized	Present	2024-06-24	75.2	278.4	245.6	53.3	male	William Wilson MD	Apoorva Kota, RDMS	2024-06-04	3185	M	Y
2024-04-03	3615299	925051	1989-04-26 18:49:13	Comp Basic US	Finalized	Present	2024-06-18	72.7	277.2	258.6	59.5		Fred Fredriskson MD	Natalie Serano, RDMS	2024-05-16	2285	F	Y
2024-04-03	3437880	1927620	1989-05-24 19:46:52	Comp Detailed US	Revised	Present	2024-08-29	42.2	160.1	144.3	27.5	male	William Wilson MD	Apoorva Kota, RDMS	2024-08-28	3530	M	Y
2024-04-03	3455293	1943964	1993-04-08 20:31:52	Comp Detailed US	Finalized	Present	2024-08-26	42.7	167.9	136.5	29.6	male	Fred Fredriskson MD	Tania Smith, RDMS	2024-08-19	3740	M	Y
2024-04-04	3481870	94782	1986-02-18 14:26:15	Follow up US	Revised	Present	2024-08-03	57.4	201.8	182.3	39.8	female	William Wilson MD	Vicky Martinez, RDMS	2024-07-12	2540	F	Y
2024-04-04	3636198	404043	1980-12-19 20:45:56	Comp Basic US	Finalized	Present	2024-05-28	77	282	260.2	56.9		Jackie Jackson MD	Apoorva Kota, RDMS	2024-05-08	1980	M	Y
2024-04-04	3499158	425985	1996-04-07 23:51:33	Follow up US	Finalized	Present	2024-04-20	85	323.3	324.9	68.3	male	William Wilson MD	Apoorva Kota, RDMS	2024-04-14	3235	M	Y
2024-04-04	3528599	672152	1990-09-25 11:23:26	Comp Detailed US	Finalized	Present	2024-08-26	49.3	185.7	147	35.5	male	Jennifer Jenson MD	Vicky Martinez, RDMS	2024-08-19	4380	M	Y
2024-04-04	3578950	1203843	1990-02-26 14:13:35	Follow up US	Revised	Present	2024-08-06	53.4	199.2	164.4	40.8	female	William Wilson MD	Estefania Traun, RDMS	2024-07-31	3290	F	Y
2024-04-04	3355149	1261634	1988-11-02 21:57:39	Follow up US	Finalized	Present	2024-08-06	51.3	200.3	174.9	39.8	female	Jennifer Jenson MD	Vicky Martinez, RDMS	2024-07-20	2800	F	Y
2024-04-04	3590779	1442817	1986-03-29 14:36:05	Comp Detailed US	Finalized	Present	2024-08-25	43.5	154.5	148.9	31	female	Jennifer Jenson MD	Deepa Yow, RDMS	2024-08-19	3190	F	Y
2024-04-04	3314436	1739053	1981-01-01 21:36:33	Comp Detailed US	Finalized	Present	2024-08-30	44.4	161.1	133.9	25.9	female	Jackie Jackson MD	Vicky Martinez, RDMS	2024-08-05	2460	F	Y
2024-04-04	3271319	1848795	1987-03-09 08:31:52	Comp Detailed US	Finalized	Present	2024-08-31	47.5	170.3	143.8	28	male	Jackie Jackson MD	Jessica Yuan, RDMS	2024-08-23	3360	M	Y
2024-04-04	3494216	1998297	1990-06-21 10:45:28	Follow up US	Finalized	Present	2024-04-29	92.3	340.3	322.4	71.3	female	Jennifer Jenson MD	Estefania Traun, RDMS	2024-04-18	3410	F	Y
2024-04-05	2971566	14954	1998-04-03 13:11:43	Follow up US	Finalized	Present	2024-05-29	78.4	299.7	290.9	62.9	male	William Wilson MD	Natalie Serano, RDMS	2024-05-31	3930	M	Y
2024-04-05	3634419	815893	1991-02-03 07:03:16	Follow up US	Finalized	Present	2024-05-03	97.6	352.3	344.8	78.1	female	William Wilson MD	Tania Smith, RDMS	2024-04-13	3870	F	Y
2024-04-06	3592717	186385	1990-03-26 13:31:24	Follow up US	Finalized	Present	2024-06-22	74.1	260.8	232.9	55.5	female	Jackie Jackson MD	Vicky Martinez, RDMS	2024-06-14	3020	F	Y
2024-04-06	2967327	279646	1993-01-22 19:35:37	Follow up US	Finalized	Present	2024-05-30	82.2	299.7	272.1	57.8	male	William Wilson MD	Apoorva Kota, RDMS	2024-05-19	2840	M	Y
2024-04-06	3614381	843402	1988-07-12 22:38:26	Follow up US	Finalized	Present	2024-04-25	83.8	319.2	324.7	75.5		Fred Fredriskson MD	Estefania Traun, RDMS	2024-04-24	3465	F	Y
2024-04-06	3591900	1162966	1991-04-09 08:17:48	Comp Detailed US	Revised	Present	2024-08-26	38.8	156.3	126.8	25.9	uncertain	Jackie Jackson MD	Jessica Yuan, RDMS	2024-08-15	2360	F	Y
2024-04-07	3588428	61329	2000-07-23 23:47:20	Follow up US	Finalized	Present	2024-06-28	71.9	260.7	235.9	50.6	female	William Wilson MD	Tania Smith, RDMS	2024-06-22	3790	F	Y
2024-04-07	3635588	440316	1993-01-24 19:08:54	Follow up US	Finalized	Present	2024-05-07	82.6	290.8	291	70.4	female	William Wilson MD	Apoorva Kota, RDMS	2024-04-15	1985	F	Y
2024-04-07	3526250	1304696	1988-08-23 22:17:20	Follow up US	Revised	Present	2024-06-04	78.5	300.4	310.4	62.3		Fred Fredriskson MD	Apoorva Kota, RDMS	2024-05-25	3380	M	Y
2024-04-08	3536459	73924	1976-01-10 02:48:02	Follow up US	Finalized	Present	2024-06-26	70.4	278	242.1	53.1	male	Jackie Jackson MD	Natalie Serano, RDMS	2024-06-23	3120	M	Y
2024-04-08	3567933	555132	1991-11-14 03:08:26	Follow up US	Finalized	Present	2024-05-09	86.5	318.4	306.4	68		Fred Fredriskson MD	Natalie Serano, RDMS	2024-05-05	2990	F	Y
2024-04-09	3548332	1541542	1984-03-27 01:04:41	Follow up US	Finalized	Present	2024-06-06	85.3	300.8	278.7	64	male	Andrea Anderson MD	Vicky Martinez, RDMS	2024-05-16	2990	M	Y
2024-04-10	3323891	168164	1985-03-03 19:27:11	Follow up US	Finalized	Present	2024-05-23	89.9	305.1	285.8	61.2		Fred Fredriskson MD	Vicky Martinez, RDMS	2024-05-23	3030	F	Y
2024-04-10	3524412	370817	1997-07-25 17:52:58	Follow up US	Finalized	Present	2024-08-01	60.1	219.6	198.7	41.6	male	Andrea Anderson MD	Vicky Martinez, RDMS	2024-08-05	2880	M	Y
2024-04-10	3539620	798479	1983-11-08 03:11:15	Follow up US	Revised	Present	2024-06-03	80.6	297.9	303.9	63.4	male	William Wilson MD	Natalie Serano, RDMS	2024-06-04	3710	M	Y
2024-04-10	3479578	965738	1991-03-04 08:41:43	Comp Detailed US	Finalized	Present	2024-09-02	49.5	174.1	145.7	32.4	male	Andrea Anderson MD	Jessica Yuan, RDMS	2024-08-05	2630	M	Y
2024-04-10	3525586	1134778	1993-07-20 16:32:48	Follow up US	Finalized	Present	2024-05-09	87.6	338	323.6	68.9	male	Andrea Anderson MD	Apoorva Kota, RDMS	2024-05-15	3790	M	Y
2024-04-10	3640068	1880288	1988-10-02 21:43:35	Follow up US	Finalized	Present	2024-05-03	92.5	329.2	317.6	70.3	male	William Wilson MD	Natalie Serano, RDMS	2024-04-26	2650	M	Y
2024-04-11	3636858	290007	1985-01-28 21:43:35	Comp Detailed US	Finalized	Present	2024-08-15	51.8	198.2	174.8	39.5	female	Fred Fredriskson MD	Tania Smith, RDMS	2024-08-11	3480	F	Y
2024-04-11	3648871	409075	1992-01-14 06:39:22	Comp Basic US	Finalized	Present	2024-09-17	36.5	142.3	125.6	31.2		William Wilson MD	Natalie Serano, RDMS	2025-02-24	1015	M	Y
2024-04-11	3527427	431398	1980-04-30 01:01:52	Follow up US	Finalized	Present	2024-07-02	74.6	262	245.9	55.7		William Wilson MD	Jessica Yuan, RDMS	2024-06-05	2920	F	Y
2024-04-11	3238253	1370064	1991-12-05 03:07:01	Follow up US	Finalized	Present	2024-06-04	83.4	295.3	276.2	62.2		Fred Fredriskson MD	Apoorva Kota, RDMS	2024-05-28	3340	M	Y
2024-04-11	3660583	1376435	1989-02-24 19:49:41	Follow up US	Finalized	Present	2024-05-05	86.6	318	332.6	70.8		William Wilson MD	Tania Smith, RDMS	2024-05-11	3455	F	Y
2024-04-12	3558663	606429	1986-12-30 09:50:37	Comp Detailed US	Finalized	Present	2024-09-06	40.4	156	121.4	25.2	female	William Wilson MD	Apoorva Kota, RDMS	2024-08-16	2120	F	Y
2024-04-12	3525230	985389	1987-06-03 06:39:22	Follow up US	Revised	Present	2024-07-25	61.3	227.4	208.1	45	female	William Wilson MD	Natalie Serano, RDMS	2024-06-26	2550	F	Y
2024-04-12	3619220	1308088	1988-04-05 00:23:54	Follow up US	Revised	Present	2024-05-25	89.1	316.9	300.9	72	female	Andrea Anderson MD	Jessica Yuan, RDMS	2024-05-20	3210	F	Y
2024-04-12	3360812	1387574	1987-01-07 08:07:58	Follow up US	Finalized	Present	2024-05-12	91.1	325.6	313.4	69.1		Fred Fredriskson MD	Angelica Zunj, RDMS	2024-05-04	3030	F	Y
2024-04-12	3478409	1515457	1986-02-24 15:11:15	Comp Detailed US	Finalized	Present	2024-09-10	43.3	161.4	158	25.7	male	Fred Fredriskson MD	Apoorva Kota, RDMS	2024-08-30	3115	M	Y
2024-04-12	3398779	1680951	1985-04-24 19:20:09	Follow up US	Finalized	Present	2024-07-05	72.9	271	246.5	52.2		Fred Fredriskson MD	Apoorva Kota, RDMS	2024-06-28	3480	F	Y
2024-04-12	3476475	1962104	1989-12-20 14:52:58	Follow up US	Finalized	Present	2024-06-05	77.8	278.4	265.8	60.3		William Wilson MD	Vicky Martinez, RDMS	2024-05-29	3070	F	Y
2024-04-13	3555405	265402	1984-03-17 03:00:00	Comp Detailed US	Finalized	Present	2024-09-02	47.1	169.1	152.8	33	male	William Wilson MD	Natalie Serano, RDMS	2024-08-11	2940	M	Y
2024-04-13	3552606	370443	1988-05-05 00:30:56	Follow up US	Finalized	Present	2024-06-07	79.4	294.6	271.1	63.7		Fred Fredriskson MD	Jessica Yuan, RDMS	2024-06-01	2920	M	Y
2024-04-13	3556371	1331969	1991-12-11 04:42:39	Comp Detailed US	Finalized	Present	2024-09-07	41	166.7	130.2	29.9	male	William Wilson MD	Vicky Martinez, RDMS	2024-08-30	3140	M	Y
2024-04-13	3650453	1662262	1988-12-05 20:31:52	Follow up US	Finalized	Present	2024-05-12	96.8	359	330.5	67.8		Fred Fredriskson MD	Tania Smith, RDMS	2024-04-27	3260	M	Y
2024-04-13	2885597	1838700	1980-12-27 19:58:07	Follow up US	Finalized	Present	2024-05-12	91.5	323	331.8	69.8	female	Fred Fredriskson MD	Vicky Martinez, RDMS	2024-05-11	3460	F	Y
2024-04-13	3666380	1849724	1987-05-19 05:41:43	Follow up US	Revised	Present	2024-06-15	75.6	274.9	253.5	57.8		Fred Fredriskson MD	Laura Gavva, RDMS	2024-04-16	1405	F	Y
2024-04-14	3678794	485490	1989-02-24 19:10:18	Follow up US	Finalized	Present	2024-05-04	84.2	310.6	296	67.7		Jennifer Jenson MD	Juana Manadeva, RDMS	2024-04-27	2490	F	Y
2024-04-14	3383629	650298	1989-08-11 16:28:35	Follow up US	Finalized	Present	2024-06-03	85.1	300.9	297.4	64.8	female	Jennifer Jenson MD	Natalie Serano, RDMS	2024-06-01	3310	F	Y
2024-04-14	3646272	1203843	1990-04-15 14:13:35	Follow up US	Finalized	Present	2024-08-05	54.2	211.6	186.1	43.1	female	Fred Fredriskson MD	Vicky Martinez, RDMS	2024-07-31	3290	F	Y
2024-04-14	3633961	1917852	1989-04-07 20:41:43	Comp Detailed US	Finalized	Present	2024-09-08	42.6	160.2	146.9	29.3	male	Jennifer Jenson MD	Tania Smith, RDMS	2024-08-30	2920	M	Y
2024-04-15	3624840	1069890	1990-01-09 14:43:07	Comp Basic US	Revised	Present	2024-07-06	71.7	257.1	216.8	51.4		William Wilson MD	Jessica Yuan, RDMS	2024-06-28	2420	M	Y
2024-04-16	3604689	933264	1990-09-11 11:05:09	Comp Basic US	Finalized	Present	2024-07-23	62.8	236.8	194.3	48.1	male	Jennifer Jenson MD	Tania Smith, RDMS	2024-06-14	1460	M	Y
2024-04-16	3669179	1194127	1983-05-05 07:06:05	Comp Basic US	Finalized	Present	2024-06-30	71.9	272.8	246.9	54.8	male	Jennifer Jenson MD	Vicky Martinez, RDMS	2024-06-19	2780	M	Y
2024-04-17	3517229	357929	1992-05-17 01:52:30	Comp Detailed US	Finalized	Present	2024-09-13	42.7	165.9	143.8	31.7	male	Andrea Anderson MD	Jenny Borden, RDMS	2024-09-19	3010	M	Y
2024-04-17	3657580	373442	2002-11-15 10:22:58	Comp Detailed US	Revised	Present	2024-08-13	58.2	214.1	176	44.5	female	Fred Fredriskson MD	Tania Smith, RDMS	2024-07-12	2245	F	Y
2024-04-17	3593024	1018331	1989-04-18 20:00:56	Follow up US	Finalized	Present	2024-08-11	56.3	221	191.8	45.6	male	Jennifer Jenson MD	Tania Smith, RDMS	2024-07-26	3120	M	Y
2024-04-18	3650504	39273	1990-01-11 13:32:48	Follow up US	Finalized	Present	2024-05-06	90.5	326.5	328.6	70.1	male	Jackie Jackson MD	Apoorva Kota, RDMS	2024-04-26	3240	M	Y
2024-04-18	3666278	285322	1999-02-18 07:59:31	Follow up US	Finalized	Present	2024-06-23	81.7	296	271	60.7	male	Jackie Jackson MD	Apoorva Kota, RDMS	2024-05-31	3270	M	Y
2024-04-18	3583016	644210	1991-10-06 03:45:00	Follow up US	Finalized	Present	2024-05-07	90	329.5	352.5	70.1		Fred Fredriskson MD	Jessica Yuan, RDMS	2024-04-24	3140	F	Y
2024-04-18	3377669	1300397	1986-04-18 14:23:26	Comp Detailed US	Finalized	Present	2024-09-09	47.7	177.7	162.6	33.9	male	Jennifer Jenson MD	Angelica Zunj, RDMS	2024-08-22	3980	M	Y
2024-04-18	3677781	1318230	1983-09-23 04:25:46	Follow up US	Finalized	Present	2024-06-13	86	298.7	291.4	63		Fred Fredriskson MD	Natalie Serano, RDMS	2024-06-10	3580	F	Y
2024-04-18	3684500	1418855	1990-05-10 12:14:03	Follow up US	Revised	Present	2024-07-06	74.6	269.7	251	52.3		Fred Fredriskson MD	Angelica Zunj, RDMS	2024-06-14	3000	F	Y
2024-04-18	3493652	1570582	1991-04-09 06:19:41	Follow up US	Finalized	Present	2024-05-09	95.4	328.9	312.4	72.3	male	Jennifer Jenson MD	Apoorva Kota, RDMS	2024-05-18	3500	M	Y
2024-04-18	3675040	1662262	1988-11-28 20:31:52	Comp Basic US	Revised	Present	2024-05-10	100.4	335.4	332	71.1		Fred Fredriskson MD	Jenny Borden, RDMS	2024-04-26	3260	M	Y
2024-04-18	3687302	1682771	1986-01-20 13:59:31	Comp Detailed US	Finalized	Present	2024-06-29	65	262.8	239.2	49.7	female	Jennifer Jenson MD	Deepa Yow, RDMS	2024-06-06	2440	F	Y
2024-04-18	3010694	1955518	1989-03-12 19:27:11	Follow up US	Finalized	Present	2024-05-17	91.6	321.3	319.7	68.2		Jennifer Jenson MD	Angelica Zunj, RDMS	2024-05-14	3060	F	Y
2024-04-19	3044080	121195	1990-10-01 10:10:18	Follow up US	Revised	Present	2024-06-13	78.9	289	269.2	60.4		Fred Fredriskson MD	Angelica Zunj, RDMS	2024-06-08	3420	F	Y
2024-04-19	3627028	438742	1984-04-30 00:45:00	Follow up US	Finalized	Present	2024-06-08	83.1	302.8	277.5	63.1		Fred Fredriskson MD	Angelica Zunj, RDMS	2024-06-06	2920	M	Y
2024-04-19	3594148	616004	1993-08-27 18:07:01	Follow up US	Finalized	Present	2024-08-16	57.6	205.5	182.5	41.8	female	Andrea Anderson MD	Estefania Traun, RDMS	2024-08-07	2900	F	Y
2024-04-19	3312047	872856	1994-09-23 10:06:05	Follow up US	Finalized	Present	2024-06-16	83.3	303	293.6	61.5		Fred Fredriskson MD	Vicky Martinez, RDMS	2024-06-06	3470	F	Y
2024-04-19	3648362	901978	1988-05-31 00:16:52	Follow up US	Finalized	Present	2024-05-17	84.7	305.9	327.1	71.8		Fred Fredriskson MD	Vicky Martinez, RDMS	2024-05-20	3570	F	Y
2024-04-19	3616059	1165578	1988-03-13 02:57:11	Follow up US	Finalized	Present	2024-10-07	35.6	126.6	103.9	22.2		Fred Fredriskson MD	Jessica Yuan, RDMS	2024-09-05	3250	M	Y
2024-04-19	3696435	1172908	1990-05-26 12:47:48	Comp Basic US	Finalized	Present	2024-06-23	75.2	284.1	257	57.8	male	Fred Fredriskson MD	Juana Manadeva, RDMS	2024-06-08	2780	M	Y
2024-04-19	3405359	1353621	1996-03-14 02:45:56	Comp Detailed US	Finalized	Present	2024-09-11	37.4	159	138.9	27.9	female	Fred Fredriskson MD	Apoorva Kota, RDMS	2024-09-03	2960	F	Y
2024-04-19	3046829	1618121	1985-11-28 15:45:00	Follow up US	Finalized	Present	2024-06-16	85.7	311.5	278.3	63		Fred Fredriskson MD	Apoorva Kota, RDMS	2024-06-27	4190	M	Y
2024-04-19	3588786	1771642	1990-01-26 14:27:39	Follow up US	Finalized	Present	2024-07-09	69.2	263.9	243.4	54		Jackie Jackson MD	Natalie Serano, RDMS	2024-07-03	3000	M	Y
2024-04-19	3688682	1941471	1992-12-17 22:46:52	Comp Detailed US	Finalized	Present	2024-09-11	43.2	156.8	135.8	28.5	female	Fred Fredriskson MD	Apoorva Kota, RDMS	2024-09-07	2440	F	Y
2024-04-20	3594402	182879	1991-06-22 06:05:37	Follow up US	Finalized	Present	2024-07-21	65.6	253.9	231.7	50.1	male	Jackie Jackson MD	Apoorva Kota, RDMS	2024-06-17	2790	M	Y
2024-04-20	3703581	535702	1993-10-25 16:42:39	Follow up US	Finalized	Present	2024-08-14	62.2	218.8	185.4	46.1		Fred Fredriskson MD	Deepa Yow, RDMS	2024-08-09	3350	F	Y
2024-04-20	3480293	680948	1987-06-19 07:15:56	Comp Detailed US	Finalized	Present	2024-09-06	48.1	182.1	151.4	36.8	male	Jackie Jackson MD	Estefania Traun, RDMS	2024-09-05	3010	M	Y
2024-04-20	3594097	1337580	1987-07-09 13:14:31	Follow up US	Finalized	Present	2024-05-18	93.3	320.8	314.8	65.8		Jackie Jackson MD	Natalie Serano, RDMS	2025-08-24	3420	F	Y
2024-04-20	3642506	1543187	1990-10-11 11:26:15	Follow up US	Finalized	Present	2024-08-15	55	208.2	173.5	40.1	female	Jennifer Jenson MD	Jessica Yuan, RDMS	2024-08-11	3475	F	Y
2024-04-20	3433179	1642588	1990-07-24 13:04:41	Comp Detailed US	Finalized	Present	2024-09-09	43.3	170.5	141.2	34.5	male	Jennifer Jenson MD	Jenny Borden, RDMS	2024-09-10	3910	M	Y
2024-04-20	3589246	1929953	1989-11-18 15:40:46	Follow up US	Finalized	Present	2024-07-07	69.4	264.9	254.7	50.4	female	Jackie Jackson MD	Vicky Martinez, RDMS	2024-06-19	3140	F	Y
2024-04-20	3586948	1959415	1986-07-31 12:26:43	Follow up US	Finalized	Present	2024-07-22	68.4	243.8	227.5	54.3		Fred Fredriskson MD	Natalie Serano, RDMS	2024-07-21	2950	M	Y
2024-04-21	3628655	813944	2000-10-04 21:40:46	Follow up US	Finalized	Present	2024-05-23	86.4	338.4	323.5	69.3		Jackie Jackson MD	Estefania Traun, RDMS	2024-05-24	3515	M	Y
2024-04-21	3597151	913601	1993-11-08 15:00:00	Follow up US	Finalized	Present	2024-06-06	88.2	302.9	297.8	69.4		Fred Fredriskson MD	Vicky Martinez, RDMS	2024-05-29	3250	M	Y
2024-04-21	3566714	1216648	1996-03-06 03:14:03	Comp Detailed US	Finalized	Present	2024-09-22	44	154.8	123.7	29.5	female	Jennifer Jenson MD	Natalie Serano, RDMS	2024-08-25	2560	F	Y
2024-04-21	3619067	1344970	1996-02-11 01:45:28	Follow up US	Finalized	Present	2024-05-31	85.6	304.7	282.3	61.3		Jackie Jackson MD	Jessica Yuan, RDMS	2024-05-31	2810	M	Y
2024-04-22	3464350	1439761	1988-02-10 03:25:18	Comp Detailed US	Revised	Present	2024-09-12	46.3	168.5	138.5	29.1	male	Jennifer Jenson MD	Jessica Yuan, RDMS	2024-08-11	2700	M	Y
2024-04-23	3600402	1041206	1988-04-22	Comp Basic US	Finalized	Present	2024-05-09	91.2	331.7	313.1	72.1		Jennifer Jenson MD	Apoorva Kota, RDMS	2024-04-27	3145	M	Y
2024-04-23	3682921	1284073	1992-08-29 22:25:46	Follow up US	Finalized	Present	2024-05-22	92.3	314.9	325.7	67.8	male	Andrea Anderson MD	Apoorva Kota, RDMS	2024-05-11	3300	M	Y
2024-04-23	3583475	1408704	1997-02-22 20:47:20	Follow up US	Finalized	Present	2024-08-22	54.2	209.1	184.3	39.3	male	Jennifer Jenson MD	Jenny Borden, RDMS	2024-07-28	2810	M	Y
2024-04-23	3633652	1765351	1987-12-21 02:54:22	Follow up US	Finalized	Present	2024-05-29	82.7	298.9	302.5	67	male	Jennifer Jenson MD	Vicky Martinez, RDMS	2024-05-11	2570	M	Y
2024-04-24	3698068	1418634	1987-02-04 08:37:30	Follow up US	Finalized	Present	2024-08-17	58	209.1	192.6	43.2	female	William Wilson MD	Jessica Yuan, RDMS	2024-07-27	2550	F	Y
2024-04-24	3690769	1912415	1988-11-14 22:38:26	Comp Detailed US	Finalized	Present	2024-09-19	40.3	154.3	136.8	27.3	male	Jennifer Jenson MD	Natalie Serano, RDMS	2024-08-15	1970	M	Y
2024-04-25	3658952	73924	1975-12-24 02:48:02	Follow up US	Finalized	Present	2024-06-25	84.4	303.2	261.1	57.1	male	William Wilson MD	Jessica Yuan, RDMS	2024-06-24	3120	M	Y
2024-04-25	3085913	253010	1991-11-07 04:10:18	Follow up US	Finalized	Present	2024-06-20	81.3	301	281.5	62.2	female	Jennifer Jenson MD	Estefania Traun, RDMS	2024-06-15	3230	F	Y
2024-04-25	3530744	826000	1983-05-27 07:30:00	Comp Detailed US	Finalized	Present	2024-09-22	44.6	155	145.2	35	male	William Wilson MD	Estefania Traun, RDMS	2024-09-09	3420	M	Y
2024-04-25	3449892	1960073	1993-04-01 18:50:37	Follow up US	Finalized	Present	2024-06-17	83.3	307.4	267.5	58.3	male	William Wilson MD	Jessica Yuan, RDMS	2024-05-25	2570	M	Y
2024-04-25	3605658	1972935	1985-07-20 18:25:18	Follow up US	Finalized	Present	2024-08-15	62.8	230.3	203.5	42.4	female	William Wilson MD	Tania Smith, RDMS	2024-07-15	2620	F	Y
2024-04-25	3713568	1989468	1985-03-17 19:41:15	Follow up US	Finalized	Present	2024-08-23	58.9	203.5	181.1	35.1	female	Andrea Anderson MD	Vicky Martinez, RDMS	2024-07-10	2080	F	Y
2024-04-26	3715451	157125	1994-06-20 11:19:13	Follow up US	Finalized	Present	2024-05-19	86.2	312.4	294.4	68.2		Andrea Anderson MD	Angelica Zunj, RDMS	2024-05-10	2960	M	Y
2024-04-26	3644186	404043	1980-12-24 20:45:56	Follow up US	Finalized	Present	2024-05-27	83.7	307.4	258.7	65.4		William Wilson MD	Tania Smith, RDMS	2024-05-08	1980	M	Y
2024-04-26	3614789	879492	1995-06-12 06:35:09	Follow up US	Finalized	Present	2024-06-21	80.7	288.8	282.4	62.1	male	Jackie Jackson MD	Natalie Serano, RDMS	2024-06-22	3410	M	Y
2024-04-26	3527171	1304696	1988-09-11 22:17:20	Follow up US	Finalized	Present	2024-06-04	86.3	316.6	326.1	69		William Wilson MD	Apoorva Kota, RDMS	2024-05-24	3380	M	Y
2024-04-27	3677375	109345	2002-05-18 13:21:33	Follow up US	Finalized	Present	2024-08-16	62.2	226	189.6	45.2	male	Jackie Jackson MD	Estefania Traun, RDMS	2024-07-31	2680	M	Y
2024-04-27	3706943	198910	1988-06-10 23:19:13	Follow up US	Finalized	Present	2024-05-25	89.1	324.7	314	72.2		Jackie Jackson MD	Estefania Traun, RDMS	2024-05-11	2740	F	Y
2024-04-27	3529824	381505	1989-06-23 19:15:56	Comp Detailed US	Finalized	Present	2024-09-22	42.3	170.1	136.4	31.9	male	Jennifer Jenson MD	Tania Smith, RDMS	2024-09-08	3300	M	Y
2024-04-27	3731194	409075	1992-01-16 06:39:22	Follow up US	Finalized	Present	2024-09-15	46	164.2	141.9	28.8		Jackie Jackson MD	Natalie Serano, RDMS	2025-02-25	1015	M	Y
2024-04-27	3547311	506485	1999-03-19 08:54:22	Comp Detailed US	Finalized	Present	2024-09-18	46.8	171.6	150.3	33.6	female	Jennifer Jenson MD	Jenny Borden, RDMS	2024-09-03	3260	F	Y
2024-04-27	3695518	1318230	1983-09-06 04:25:46	Comp Basic US	Finalized	Present	2024-06-13	88.2	313.3	299.7	65.4	female	Jackie Jackson MD	Natalie Serano, RDMS	2024-06-10	3580	F	Y
2024-04-27	3492482	1557920	1990-01-14 14:30:28	Follow up US	Finalized	Present	2024-06-26	84.9	307.6	285	63.9	male	Jackie Jackson MD	Vicky Martinez, RDMS	2024-06-27	4130	M	Y
2024-04-27	3625805	1619653	1987-09-03 04:59:31	Follow up US	Finalized	Present	2024-06-23	82.3	306.6	290.2	63.9	female	William Wilson MD	Deepa Yow, RDMS	2024-06-02	3045	F	Y
2024-04-27	3552504	1981132	1990-11-05 11:33:16	Comp Detailed US	Finalized	Present	2024-09-23	39.2	154	137	25.7	female	Jackie Jackson MD	Apoorva Kota, RDMS	2024-09-22	3355	F	Y
2024-04-28	3658139	798479	1983-12-21 03:11:15	Follow up US	Finalized	Present	2024-06-05	81.4	324.2	313.8	69.8	male	William Wilson MD	Vicky Martinez, RDMS	2024-06-02	3710	M	Y
2024-04-28	3618915	846030	1988-08-25 22:41:15	Follow up US	Finalized	Present	2024-06-02	94.6	326.6	311.3	71.4	male	William Wilson MD	Tania Smith, RDMS	2024-05-24	3490	M	Y
2024-04-28	3513976	920016	1988-10-10 00:21:05	Comp Detailed US	Finalized	Present	2024-09-22	40	154.3	133.8	30.4	female	Jennifer Jenson MD	Apoorva Kota, RDMS	2024-09-26	3510	F	Y
2024-04-28	3560345	1197700	1991-01-06 10:34:13	Comp Detailed US	Finalized	Present	2024-09-20	46.8	161.4	131.1	30.5	female	Jennifer Jenson MD	Jenny Borden, RDMS	2024-09-19	3010	F	Y
2024-04-29	3638338	604209	1982-08-14 12:37:58	Comp Detailed US	Finalized	Present	2024-10-21	25.7	106.8	79.4	14.2	male	Jennifer Jenson MD	Estefania Traun, RDMS	2024-09-17	1665	M	Y
2024-04-29	3626569	1625134	1993-04-06 19:46:52	Follow up US	Finalized	Present	2024-08-14	65	235.2	222.6	47.1	male	William Wilson MD	Vicky Martinez, RDMS	2024-07-21	3690	M	Y
2024-04-30	3657425	206476	1991-07-19 06:28:07	Comp Detailed US	Finalized	Present	2024-09-19	50	175.9	153.9	32.4	male	Jennifer Jenson MD	Natalie Serano, RDMS	2024-08-24	2785	M	Y
2024-04-30	3730838	617211	1987-12-19 02:27:39	Follow up US	Finalized	Present	2024-06-19	88.3	305.9	307.9	61.2		Fred Fredriskson MD	Jenny Borden, RDMS	2024-05-30	3270	F	Y
2024-04-30	3545271	1453700	1982-01-18 16:11:43	Comp Detailed US	Finalized	Present	2024-09-22	43.1	159.7	129.2	29.8	female	Jennifer Jenson MD	Deepa Yow, RDMS	2024-09-20	3160	F	Y
2024-05-01	3743131	121084	1994-01-29 13:41:15	Follow up US	Finalized	Present	2024-04-28	94.2	340	351.4	78.4		Jennifer Jenson MD	Matthea Gregorio, RDMS	2024-05-02	3770	F	Y
2024-05-01	3548689	264161	1990-06-02 13:04:41	Follow up US	Finalized	Present	2024-07-19	71.5	259.4	252.1	55.5		Fred Fredriskson MD	Natalie Serano, RDMS	2024-07-07	3195	F	Y
2024-05-01	3691078	1203843	1990-04-19 14:13:35	Follow up US	Finalized	Present	2024-08-05	60.6	238.1	206.8	49.5		William Wilson MD	Estefania Traun, RDMS	2024-07-31	3290	F	Y
2024-05-02	3705318	14954	1998-04-02 13:11:43	Follow up US	Finalized	Present	2024-05-31	84.2	332.4	322	71.1		Fred Fredriskson MD	Natalie Serano, RDMS	2024-06-01	3930	M	Y
2024-05-02	3664448	168164	1985-02-25 19:27:11	Follow up US	Finalized	Present	2024-05-24	90.5	325.3	309.8	67.1		Fred Fredriskson MD	Jessica Yuan, RDMS	2024-05-22	3030	F	Y
2024-05-02	3732110	356357	1993-06-28 17:24:50	Follow up US	Revised	Present	2024-06-25	87.2	325.2	291	62.3	male	Jennifer Jenson MD	Estefania Traun, RDMS	2024-06-03	3185	M	Y
2024-05-02	3740682	1069890	1990-01-18 14:43:07	Follow up US	Finalized	Present	2024-07-06	74.8	273.2	244	56.8		William Wilson MD	Leticia Castro, RDMS	2024-06-30	2420	M	Y
2024-05-02	3551030	1459451	1989-05-27 20:07:58	Comp Detailed US	Revised	Present	2024-09-27	46.4	166.8	145.5	32.6	male	Jackie Jackson MD	Apoorva Kota, RDMS	2024-09-06	2780	M	Y
2024-05-02	3716214	1487392	2001-02-24 20:00:56	Comp Basic US	Finalized	Present	2024-06-21	88.6	310.2	301.8	64.4	female	Jackie Jackson MD	Jessica Yuan, RDMS	2024-06-16	3590	F	Y
2024-05-02	3545220	1849741	1993-12-28 15:19:41	Follow up US	Revised	Present	2024-06-26	83.8	298.1	272.4	62.5	male	Jennifer Jenson MD	Deepa Yow, RDMS	2024-06-20	3290	M	Y
2024-05-03	3691896	61329	2000-07-14 23:47:20	Follow up US	Finalized	Present	2024-06-30	80.2	289.8	283.7	63.4	female	William Wilson MD	Jenny Borden, RDMS	2024-06-23	3790	F	Y
2024-05-03	3649129	253361	1986-10-30 10:30:00	Follow up US	Finalized	Present	2024-07-01	82.5	299.6	263.5	58.4		William Wilson MD	Angelica Zunj, RDMS	2024-07-03	3310	M	Y
2024-05-03	3672953	279646	1993-03-19 19:35:37	Comp Basic US	Finalized	Present	2024-05-31	93.6	320.3	287	69.4	male	William Wilson MD	Jessica Yuan, RDMS	2024-05-19	2840	M	Y
2024-05-03	3738432	318914	1989-11-01 15:28:07	Comp Basic US	Finalized	Present	2024-05-18	91.5	330.6	299.8	74.4	female	Jennifer Jenson MD	Deepa Yow, RDMS	2024-05-02	2720	F	Y
2024-05-03	3698324	335604	1992-09-13 00:21:05	Comp Detailed US	Finalized	Present	2024-09-25	39.1	155	140.5	32.5	female	Jackie Jackson MD	Natalie Serano, RDMS	2024-09-16	3320	F	Y
2024-05-03	3638083	925051	1989-04-10 18:49:13	Follow up US	Finalized	Present	2024-06-17	84.7	307.8	304.9	65.7		William Wilson MD	Natalie Serano, RDMS	2024-05-16	2285	F	Y
2024-05-03	3672749	1065867	1981-01-26 22:14:31	Comp Detailed US	Finalized	Present	2024-09-28	44.5	166.3	149.4	30	male	Fred Fredriskson MD	Angelica Zunj, RDMS	2024-09-21	3300	M	Y
2024-05-03	3280549	1183573	1987-02-06 08:15:00	Follow up US	Finalized	Present	2024-06-02	91.3	314.5	328.9	70.2	male	William Wilson MD	Natalie Serano, RDMS	2024-05-24	3320	M	Y
2024-05-03	3714280	1223456	1996-04-15 09:18:16	Follow up US	Revised	Present	2024-06-25	81.1	301.2	275.3	65.1		Fred Fredriskson MD	Deepa Yow, RDMS	2025-09-28	2930	F	Y
2024-05-03	3619322	1308088	1988-04-18 00:23:54	Follow up US	Finalized	Present	2024-05-25	88.8	321.8	329.1	69.9	female	William Wilson MD	Apoorva Kota, RDMS	2024-05-20	3210	F	Y
2024-05-03	3545424	1962104	1989-12-13 14:52:58	Follow up US	Finalized	Present	2024-06-06	83	314.3	297.8	64.7		William Wilson MD	Jenny Borden, RDMS	2024-05-31	3070	F	Y
2024-05-04	3676764	1088360	1989-03-23 20:55:46	Comp Detailed US	Finalized	Present	2024-10-02	40.2	163.9	139.6	29.6	female	William Wilson MD	Estefania Traun, RDMS	2024-09-28	3110	F	Y
2024-05-04	3681543	1339519	1985-01-30 20:24:50	Follow up US	Finalized	Present	2024-06-27	84	306.3	272.2	59.6	male	William Wilson MD	Apoorva Kota, RDMS	2024-06-16	3270	M	Y
2024-05-04	3111875	1345350	1992-08-13 22:53:54	Follow up US	Finalized	Present	2024-06-28	82.5	301.6	266.7	55.3	female	William Wilson MD	Jessica Yuan, RDMS	2024-06-27	3330	F	Y
2024-05-04	3449994	1588871	1984-07-22 00:40:46	Comp Detailed US	Finalized	Present	2024-09-29	46.6	172.3	138.4	30.3	male	William Wilson MD	Jessica Yuan, RDMS	2024-09-20	3910	M	Y
2024-05-04	3308192	1793189	1992-03-23 02:02:20	Follow up US	Finalized	Present	2024-07-28	77.2	267.1	241.8	52.1	male	William Wilson MD	Apoorva Kota, RDMS	2024-07-25	4000	M	Y
2024-05-05	3490695	92805	1988-03-10 00:54:50	Follow up US	Finalized	Present	2024-07-23	71.1	271.7	246.8	50.5		Fred Fredriskson MD	Estefania Traun, RDMS	2024-05-05	1210	F	Y
2024-05-05	3695416	322422	1986-01-09 16:03:16	Comp Detailed US	Finalized	Present	2024-09-29	43	160.2	141.4	29.2	female	William Wilson MD	Jessica Yuan, RDMS	2024-09-20	2880	F	Y
2024-05-05	3680776	948035	1990-01-31 16:25:46	Comp Detailed US	Finalized	Present	2024-09-26	44.4	161.5	139.7	32.7	female	Jackie Jackson MD	Natalie Serano, RDMS	2024-09-27	3805	F	Y
2024-05-05	3629868	1512966	1995-03-13 07:30:00	Follow up US	Finalized	Present	2024-05-27	98.3	362.9	364.1	71.8		Fred Fredriskson MD	Apoorva Kota, RDMS	2024-05-22	4315	M	Y
2024-05-05	3615653	1697624	1975-05-27 08:05:09	Comp Detailed US	Finalized	Present	2024-09-28	41.6	160.2	134.6	27.7	female	William Wilson MD	Apoorva Kota, RDMS	2024-09-09	2980	F	Y
2024-05-07	3658597	1541542	1984-04-05 01:04:41	Follow up US	Finalized	Present	2024-06-05	91.7	327.3	306.1	74	male	Jennifer Jenson MD	Deepa Yow, RDMS	2024-05-15	2990	M	Y
2024-05-08	3769392	74784	1988-10-18 22:58:07	Follow up US	Finalized	Present	2024-07-25	67.5	255.2	233.5	53.5		Fred Fredriskson MD	Juana Manadeva, RDMS	2024-07-20	2930	F	Y
2024-05-08	3767511	425166	1994-11-14 10:00:28	Follow up US	Finalized	Present	2024-07-09	80.5	289.4	268.6	60.7	male	William Wilson MD	Tania Smith, RDMS	2024-06-22	3250	M	Y
2024-05-08	3669842	646904	1995-06-06 07:38:26	Comp Detailed US	Finalized	Present	2024-10-03	48.4	164.7	138.4	29.9	male	Jennifer Jenson MD	Jessica Yuan, RDMS	2024-09-15	2460	M	Y
2024-05-08	3770550	933264	1990-08-16 11:05:09	Follow up US	Revised	Present	2024-07-23	74.9	267	220	48.4		Fred Fredriskson MD	Laura Gavva, RDMS	2024-06-12	1460	M	Y
2024-05-08	3765369	1018331	1989-04-18 20:00:56	Follow up US	Finalized	Present	2024-08-12	67.2	249.4	206.7	45.2	male	Jennifer Jenson MD	Jessica Yuan, RDMS	2024-07-25	3120	M	Y
2024-05-08	3667043	1370064	1991-11-06 03:07:01	Follow up US	Finalized	Present	2024-06-04	85.2	311.3	314.3	64.9		Fred Fredriskson MD	Angelica Zunj, RDMS	2024-05-29	3340	M	Y
2024-05-08	3633192	1442817	1986-03-21 14:36:05	Follow up US	Finalized	Present	2024-08-26	58.7	215.8	195.6	41.3		Fred Fredriskson MD	Angelica Zunj, RDMS	2024-08-19	3190	F	Y
2024-05-09	3601067	53949	1993-06-15 19:28:35	Comp Detailed US	Finalized	Present	2024-10-03	45.4	170	141.6	31.3	male	Fred Fredriskson MD	Jessica Yuan, RDMS	2024-09-20	2880	M	Y
2024-05-09	3386075	186385	1990-04-01 13:31:24	Follow up US	Finalized	Present	2024-06-23	83	297.5	281.6	65.4		Fred Fredriskson MD	Apoorva Kota, RDMS	2024-06-13	3020	F	Y
2024-05-09	3754502	391971	1985-06-05 18:49:13	Follow up US	Finalized	Present	2024-07-30	72.4	267.1	224.1	53.4	female	William Wilson MD	Estefania Traun, RDMS	2024-07-25	3100	F	Y
2024-05-09	3669688	409075	1992-01-09 06:39:22	Comp Basic US	Finalized	Present	2024-09-17	52.2	198.6	157.8	34.2	uncertain	William Wilson MD	Estefania Traun, RDMS	2025-02-24	1015	M	Y
2024-05-09	3149000	431398	1980-03-28 01:01:52	Follow up US	Revised	Present	2024-07-04	84.2	295.5	287.4	63.4		William Wilson MD	Jenny Borden, RDMS	2024-06-06	2920	F	Y
2024-05-09	3609699	455479	1989-12-10 16:59:31	Comp Detailed US	Finalized	Present	2024-10-07	36.4	149.7	126.7	24.2	female	William Wilson MD	Apoorva Kota, RDMS	2024-09-18	3175	F	Y
2024-05-09	3676815	1306868	1986-03-13 14:57:11	Comp Detailed US	Finalized	Present	2024-10-02	47.2	170.8	148.7	33.6	male	William Wilson MD	Apoorva Kota, RDMS	2024-09-24	3930	M	Y
2024-05-09	3622394	1946655	1992-09-12 00:02:48	Comp Detailed US	Finalized	Present	2024-10-03	41.6	165.5	132	31.8	female	William Wilson MD	Angelica Zunj, RDMS	2024-09-14	2440	F	Y
2024-05-10	3389906	207219	1991-12-09 03:11:15	Follow up US	Finalized	Present	2024-07-03	80.6	295.7	280.7	63	male	William Wilson MD	Angelica Zunj, RDMS	2024-07-01	3690	M	Y
2024-05-10	3667448	290007	1985-01-06 21:43:35	Follow up US	Finalized	Present	2024-08-17	65.7	240.7	225.2	49.2	female	William Wilson MD	Natalie Serano, RDMS	2024-08-10	3480	F	Y
2024-05-10	3714891	932390	1988-09-29 23:19:13	Comp Detailed US	Finalized	Present	2024-10-02	43.9	168.1	140	31.2	female	William Wilson MD	Jenny Borden, RDMS	2024-09-10	2790	F	Y
2024-05-10	3385973	1418855	1990-05-11 12:14:03	Follow up US	Finalized	Present	2024-07-04	82.2	301.3	298.3	64		William Wilson MD	Jessica Yuan, RDMS	2024-06-16	3000	F	Y
2024-05-10	3620906	1680951	1985-05-06 19:20:09	Follow up US	Finalized	Present	2024-07-07	87.3	310.2	275.8	61.9		Fred Fredriskson MD	Estefania Traun, RDMS	2024-06-29	3480	F	Y
2024-05-10	3694447	1921277	1993-08-20 19:10:18	Comp Detailed US	Finalized	Present	2024-10-03	47.2	168.2	148.1	32.9	male	William Wilson MD	Apoorva Kota, RDMS	2024-09-26	3020	M	Y
2024-05-10	3694396	1941471	1992-11-07 22:46:52	Follow up US	Finalized	Present	2024-09-12	53.9	189.9	167.9	35.8	female	Jennifer Jenson MD	Natalie Serano, RDMS	2024-09-09	2440	F	Y
2024-05-11	3752918	285322	1999-01-27 07:59:31	Follow up US	Finalized	Present	2024-06-23	82.8	304.9	293.9	67.5	male	Jennifer Jenson MD	Estefania Traun, RDMS	2024-05-31	3270	M	Y
2024-05-11	3665871	370443	1988-04-23 00:30:56	Follow up US	Finalized	Present	2024-06-08	86.3	316.4	305.7	68.1		Fred Fredriskson MD	Jessica Yuan, RDMS	2024-06-01	2920	M	Y
2024-05-11	3594300	811452	1989-11-26 17:13:35	Comp Detailed US	Revised	Present	2024-10-06	43.1	152.8	135.6	30	female	William Wilson MD	Natalie Serano, RDMS	2024-09-18	3185	F	Y
2024-05-11	3601324	1094026	1993-06-04 19:49:41	Comp Detailed US	Finalized	Present	2024-09-30	46.5	173.8	148.8	32	female	Jennifer Jenson MD	Jessica Yuan, RDMS	2024-09-19	3000	F	Y
2024-05-11	3667601	1515457	1986-02-15 15:11:15	Follow up US	Finalized	Present	2024-09-09	59	214.5	191.4	37.1	male	William Wilson MD	Angelica Zunj, RDMS	2024-08-30	3115	M	Y
2024-05-11	3781901	1682771	1986-01-21 13:59:31	Follow up US	Finalized	Present	2024-06-29	73	271.6	261.6	61.6	female	Jennifer Jenson MD	Angelica Zunj, RDMS	2024-06-04	2440	F	Y
2024-05-11	3705826	1683549	1996-08-24 00:39:22	Comp Detailed US	Finalized	Present	2024-10-02	45.6	170.2	138.8	30.7	female	William Wilson MD	Jenny Borden, RDMS	2024-10-02	3480	F	Y
2024-05-11	3314588	1739053	1981-01-24 21:36:33	Comp Basic US	Finalized	Present	2024-08-31	55	220.9	183	40.2		Fred Fredriskson MD	Estefania Traun, RDMS	2024-08-04	2460	F	Y
2024-05-11	3697149	1771642	1990-01-25 14:27:39	Follow up US	Finalized	Present	2024-07-09	80.6	290.3	264.8	64.5		William Wilson MD	Apoorva Kota, RDMS	2024-07-03	3000	M	Y
2024-05-11	3737974	1820624	1997-02-14 21:43:35	Comp Detailed US	Finalized	Present	2024-09-30	48.4	172.3	153.7	32.9	female	Jennifer Jenson MD	Apoorva Kota, RDMS	2024-09-12	2580	F	Y
2024-05-12	3676917	370817	1997-08-10 17:52:58	Follow up US	Finalized	Present	2024-07-30	75.8	267.6	240.3	51.7	male	Jennifer Jenson MD	Jessica Yuan, RDMS	2024-08-05	2880	M	Y
2024-05-12	3666329	985389	1987-04-27 06:39:22	Follow up US	Finalized	Present	2024-07-24	70.5	266.4	247.8	52.3	female	William Wilson MD	Jessica Yuan, RDMS	2024-06-26	2550	F	Y
2024-05-12	3566101	1113223	1988-02-15 04:15:56	Comp Detailed US	Finalized	Present	2024-10-05	47.2	167.6	134.6	26.7	male	William Wilson MD	Jessica Yuan, RDMS	2024-09-30	3610	M	Y
2024-05-12	3698988	1344970	1996-02-06 01:45:28	Follow up US	Finalized	Present	2024-06-02	87.2	322.9	325	66.2		Jennifer Jenson MD	Jenny Borden, RDMS	2024-05-31	2810	M	Y
2024-05-12	3621008	1497839	1998-12-27 09:00:00	Follow up US	Finalized	Present	2024-07-26	74.7	264.9	238.1	54.2	female	William Wilson MD	Apoorva Kota, RDMS	2024-07-19	3080	F	Y
2024-05-13	3786740	1872335	1987-08-21 05:41:43	Follow up US	Revised	Present	2024-06-26	84.5	322.1	295.4	67.6		Jennifer Jenson MD	Estefania Traun, RDMS	2024-06-24	3320	F	Y
2024-05-14	3801163	403906	1987-10-25 04:06:05	Comp Basic US	Finalized	Present	2024-06-07	87.1	300.7	297.6	66.5	uncertain	Jennifer Jenson MD	Leticia Castro, RDMS	2024-05-30	2270	F	Y
2024-05-14	3669739	409075	1991-12-29 06:39:22	Follow up US	Finalized	Present	2024-09-17	52.9	202.8	171.5	43.8	uncertain	Jennifer Jenson MD	Vicky Martinez, RDMS	2025-02-26	1015	M	Y
2024-05-15	3688579	1149788	1990-04-06 14:13:35	Follow up US	Finalized	Present	2024-08-24	67.8	245.4	215.3	48.7	male	Jackie Jackson MD	Estefania Traun, RDMS	2024-08-18	3465	M	Y
2024-05-15	3680420	1194127	1983-04-19 07:06:05	Follow up US	Revised	Present	2024-06-29	87.2	311	283.9	66.1	male	Fred Fredriskson MD	Natalie Serano, RDMS	2024-06-19	2780	M	Y
2024-05-15	3697098	1620563	1981-07-03 19:02:34	Follow up US	Finalized	Present	2024-08-05	77.5	273.2	277.3	56.5	male	Jennifer Jenson MD	Apoorva Kota, RDMS	2024-07-30	4260	M	Y
2024-05-16	3044131	121195	1990-10-06 10:10:18	Follow up US	Finalized	Present	2024-06-15	86.5	318.4	324.9	76.2		Jackie Jackson MD	Estefania Traun, RDMS	2024-06-07	3420	F	Y
2024-05-16	3553826	280379	1983-05-14 08:17:48	Comp Detailed US	Finalized	Present	2024-10-10	43.2	160.6	138.1	29.8	female	Jackie Jackson MD	Jessica Yuan, RDMS	2024-10-06	3020	F	Y
2024-05-16	3640576	352253	1999-02-03 19:42:39	Comp Detailed US	Finalized	Present	2024-10-16	40.2	148	125.7	27	male	Jennifer Jenson MD	Apoorva Kota, RDMS	2026-04-25	3755	F	Y
2024-05-16	3666532	442757	1986-03-07 14:03:45	Follow up US	Finalized	Present	2024-06-12	93	323.8	310.5	70.1		Fred Fredriskson MD	Apoorva Kota, RDMS	2024-06-13	3575	M	Y
2024-05-16	3558764	606429	1987-01-01 09:50:37	Comp Basic US	Finalized	Present	2024-09-05	56.6	218.4	172.3	39.2	female	Jennifer Jenson MD	Estefania Traun, RDMS	2024-08-17	2120	F	Y
2024-05-16	3703838	984522	1999-08-06 06:16:52	Comp Detailed US	Finalized	Present	2024-08-21	64	239.7	205.9	45.9	male	Andrea Anderson MD	Vicky Martinez, RDMS	2024-08-08	3050	M	Y
2024-05-16	3557539	1165578	1988-02-24 02:57:11	Comp Detailed US	Finalized	Present	2024-10-07	44.9	174.9	149.9	34.8	male	Jennifer Jenson MD	Apoorva Kota, RDMS	2024-09-05	3250	M	Y
2024-05-16	3739149	1172908	1990-04-06 12:47:48	Comp Detailed US	Finalized	Present	2024-06-26	89.5	302.7	291.5	67.9	male	Jackie Jackson MD	Vicky Martinez, RDMS	2024-06-07	2780	M	Y
2024-05-16	3527324	1304696	1988-08-27 22:17:20	Follow up US	Finalized	Present	2024-06-03	88.6	332.6	329.9	72.1		Jennifer Jenson MD	Deepa Yow, RDMS	2024-05-25	3380	M	Y
2024-05-16	3817273	1704107	1991-06-17 05:51:33	Follow up US	Finalized	Present	2024-07-17	74.5	277	256.7	53.6		Jackie Jackson MD	Juana Manadeva, RDMS	2024-05-26	1725	F	Y
2024-05-17	3432514	438742	1984-04-09 00:45:00	Follow up US	Finalized	Present	2024-06-10	84.6	318.2	308.3	66.6		Jackie Jackson MD	Apoorva Kota, RDMS	2024-06-07	2920	M	Y
2024-05-17	3727067	901978	1988-06-10 00:16:52	Follow up US	Finalized	Present	2024-05-17	94.4	329.1	379.2	79.6		Jennifer Jenson MD	Apoorva Kota, RDMS	2024-05-20	3570	F	Y
2024-05-17	3706489	1216648	1996-01-29 03:14:03	Follow up US	Finalized	Present	2024-09-21	49.3	188.6	165.7	36.5	female	Jennifer Jenson MD	Deepa Yow, RDMS	2024-08-27	2560	F	Y
2024-05-18	3811976	104826	1992-01-03 02:37:30	Follow up US	Finalized	Present	2024-06-08	89.4	315.7	329.8	68.9		Jennifer Jenson MD	Jessica Yuan, RDMS	2024-06-02	3120	F	Y
2024-05-18	3624126	290873	1996-10-05 23:34:41	Comp Detailed US	Finalized	Present	2024-10-11	44.9	168.3	146	32.4	male	Jennifer Jenson MD	Apoorva Kota, RDMS	2024-10-01	3250	M	Y
2024-05-18	3821384	604209	1982-08-30 12:37:58	Follow up US	Finalized	Present	2024-10-20	35.8	135.9	114.1	21.1	male	Jennifer Jenson MD	Tania Smith, RDMS	2024-09-18	1665	M	Y
2024-05-18	3726608	846030	1988-08-07 22:41:15	Follow up US	Finalized	Present	2024-06-02	96.9	346.7	348.4	72.8		Fred Fredriskson MD	Natalie Serano, RDMS	2024-05-23	3490	M	Y
2024-05-18	3707910	913601	1993-12-31 15:00:00	Follow up US	Revised	Present	2024-06-07	94.4	335.4	332.7	72.2		Fred Fredriskson MD	Angelica Zunj, RDMS	2024-05-30	3250	M	Y
2024-05-18	3766801	1439761	1988-01-07 03:25:18	Follow up US	Finalized	Present	2024-09-10	60.3	213.9	197.6	42.4		Jackie Jackson MD	Estefania Traun, RDMS	2024-08-11	2700	M	Y
2024-05-18	3734099	1534807	1989-07-28 17:58:35	Follow up US	Finalized	Present	2024-07-29	77.1	278.9	261	54.3	male	Fred Fredriskson MD	Jenny Borden, RDMS	2024-07-29	3360	M	Y
2024-05-19	3817122	725201	1980-09-15 00:20:23	Comp Detailed US	Finalized	Present	2024-10-14	44.7	167.9	142	31.1	male	Jennifer Jenson MD	Deepa Yow, RDMS	2024-09-30	3400	M	Y
2024-05-19	3650706	1401574	1987-11-10 05:38:54	Comp Detailed US	Finalized	Present	2024-10-12	41.2	156.3	137.8	27.9	female	Jackie Jackson MD	Jessica Yuan, RDMS	2024-10-09	3370	F	Y
2024-05-19	3278561	1484350	1978-04-26 13:03:59	Follow up US	Finalized	Present	2024-07-13	83.8	301.8	291.9	66.6		Jackie Jackson MD	Estefania Traun, RDMS	2024-07-13	3690	F	Y
2024-05-19	3727118	1929953	1989-12-07 15:40:46	Follow up US	Finalized	Present	2024-07-08	77.9	300.4	301.6	63		Jennifer Jenson MD	Vicky Martinez, RDMS	2024-06-19	3140	F	Y
2024-05-20	3833422	669222	1987-07-20 05:17:48	Follow up US	Finalized	Present	2024-06-15	81	297	327	68.5		Andrea Anderson MD	Juana Manadeva, RDMS	2024-05-24	2430	F	Y
2024-05-20	3733229	798479	1983-11-12 03:11:15	Follow up US	Finalized	Present	2024-06-05	88.1	329.5	331.4	75.2	male	Jackie Jackson MD	Jenny Borden, RDMS	2024-06-04	3710	M	Y
2024-05-21	3591085	854451	1989-09-16 17:34:41	Follow up US	Finalized	Present	2024-08-14	67.9	262.4	251.7	53.4	female	Jennifer Jenson MD	Angelica Zunj, RDMS	2024-08-09	3765	F	Y
2024-05-21	3758274	1343379	1994-11-11 09:18:16	Follow up US	Finalized	Present	2024-07-02	85.5	302	297.6	65.1	male	William Wilson MD	Angelica Zunj, RDMS	2024-06-21	3445	M	Y
2024-05-22	3840555	182879	1991-06-04 06:05:37	Follow up US	Finalized	Present	2024-07-19	77.4	295	287.4	61	male	Andrea Anderson MD	Estefania Traun, RDMS	2024-06-18	2790	M	Y
2024-05-22	3770754	649562	1991-03-06 08:12:11	Follow up US	Finalized	Present	2024-08-13	68.3	255.4	239.8	52.7		William Wilson MD	Angelica Zunj, RDMS	2024-08-06	3120	F	Y
2024-05-22	3723703	778034	1997-09-10 19:10:18	Comp Detailed US	Finalized	Present	2024-10-17	42.4	164.4	131.7	30.4	female	William Wilson MD	Jessica Yuan, RDMS	2024-10-17	3240	F	Y
2024-05-22	3813399	1069890	1990-02-01 14:43:07	Follow up US	Finalized	Present	2024-07-07	81.6	300.7	258.7	65.7		Jennifer Jenson MD	Vicky Martinez, RDMS	2024-06-30	2420	M	Y
2024-05-22	3710508	1408704	1997-01-15 20:47:20	Follow up US	Finalized	Present	2024-08-22	68.8	255.9	224.6	49.7	male	William Wilson MD	Angelica Zunj, RDMS	2024-07-27	2810	M	Y
2024-05-23	3751021	61329	2000-07-10 23:47:20	Follow up US	Finalized	Present	2024-06-28	86.9	314.6	307	65.2	female	Jackie Jackson MD	Apoorva Kota, RDMS	2024-06-23	3790	F	Y
2024-05-23	3837706	110411	1993-11-08 16:56:43	Comp Basic US	Finalized	Present	2024-08-26	64.8	239.7	207.5	46.6		Andrea Anderson MD	Leticia Castro, RDMS	2024-08-22	2970	M	Y
2024-05-23	3562485	666768	1988-02-28 03:37:58	Comp Detailed US	Finalized	Present	2024-10-12	43.9	160.1	132.6	30	female	Andrea Anderson MD	Angelica Zunj, RDMS	2024-10-11	3120	F	Y
2024-05-24	3786336	73924	1976-01-05 02:48:02	Follow up US	Finalized	Present	2024-06-26	90	330.9	312.1	65.6	male	Andrea Anderson MD	Apoorva Kota, RDMS	2024-06-24	3120	M	Y
2024-05-24	3773958	368537	1990-10-16 09:57:39	Comp Basic US	Finalized	Present	2024-07-15	79.5	292.2	279.6	64.5	female	Andrea Anderson MD	Jessica Yuan, RDMS	2024-06-28	2870	F	Y
2024-05-24	3827761	752442	2006-01-24 14:40:18	Follow up US	Finalized	Present	2024-07-30	72.8	271.5	226.9	56.2	female	William Wilson MD	Deepa Yow, RDMS	2024-07-06	2400	F	Y
2024-05-24	3798308	879492	1995-06-10 06:35:09	Follow up US	Finalized	Present	2024-06-22	89.2	317	323.4	69.7	male	Jackie Jackson MD	Vicky Martinez, RDMS	2024-06-22	3410	M	Y
2024-05-24	3809072	1042086	1987-01-26 09:02:48	Follow up US	Finalized	Present	2024-08-12	77.6	277.6	263.9	55.8	male	William Wilson MD	Apoorva Kota, RDMS	2024-08-06	3990	M	Y
2024-05-24	3762666	1306995	1989-08-01 18:46:24	Comp Detailed US	Finalized	Present	2024-10-08	52.2	182.6	148.4	31.7	male	William Wilson MD	Jessica Yuan, RDMS	2024-10-01	3485	M	Y
2024-05-24	3747058	1384480	1995-05-15 08:22:01	Comp Detailed US	Finalized	Present	2024-10-16	44.3	171.5	147.8	32.9	male	Jennifer Jenson MD	Estefania Traun, RDMS	2024-10-19	3830	M	Y
2024-05-24	3645611	1943463	1985-11-26 17:17:48	Comp Detailed US	Finalized	Present	2024-10-15	42.4	169.5	150.7	29.3	female	Jennifer Jenson MD	Apoorva Kota, RDMS	2024-10-09	3750	F	Y
2024-05-24	3477240	1962104	1989-12-01 14:52:58	Follow up US	Revised	Present	2024-06-06	88.7	322.3	336.9	71.6		William Wilson MD	Apoorva Kota, RDMS	2024-05-30	3070	F	Y
2024-05-24	3714942	1972935	1985-06-19 18:25:18	Follow up US	Finalized	Present	2024-08-14	74.8	270.9	246.4	52.7	female	Andrea Anderson MD	Angelica Zunj, RDMS	2024-07-14	2620	F	Y
2024-05-25	3726812	109345	2002-05-21 13:21:33	Comp Basic US	Finalized	Present	2024-08-17	69.7	255.1	230.7	54.3	male	Jackie Jackson MD	Estefania Traun, RDMS	2024-08-02	2680	M	Y
2024-05-25	3754199	564786	1988-05-20 01:24:22	Follow up US	Finalized	Present	2024-07-21	84.2	297.3	283.8	63.7	female	William Wilson MD	Apoorva Kota, RDMS	2024-07-15	3450	F	Y
2024-05-25	3784958	843800	1996-04-18 03:30:56	Comp Detailed US	Finalized	Present	2024-10-17	47.6	176.2	137.6	34.1	female	Jackie Jackson MD	Estefania Traun, RDMS	2024-10-14	3395	F	Y
2024-05-25	3752660	1557920	1990-01-18 14:30:28	Follow up US	Revised	Present	2024-06-24	94.2	329.5	339.8	74		William Wilson MD	Vicky Martinez, RDMS	2024-06-28	4130	M	Y
2024-05-26	3850285	1018331	1989-04-02 20:00:56	Follow up US	Finalized	Present	2024-08-13	73.9	269.7	238	52.4	male	Jackie Jackson MD	Apoorva Kota, RDMS	2024-07-26	3120	M	Y
2024-05-26	3694140	1406354	1988-10-22 00:14:03	Comp Detailed US	Revised	Present	2024-10-17	47.4	170.1	140	29.4	male	William Wilson MD	Jessica Yuan, RDMS	2024-10-11	3220	M	Y
2024-05-26	3735069	1625134	1993-04-29 19:46:52	Follow up US	Finalized	Present	2024-08-15	74.7	264.7	278.7	55.8	male	William Wilson MD	Apoorva Kota, RDMS	2024-07-23	3690	M	Y
2024-05-26	3201021	1726851	1991-11-21 03:42:11	Follow up US	Finalized	Present	2024-07-20	81.9	299.1	266.1	57.7	male	Jackie Jackson MD	Jessica Yuan, RDMS	2024-07-20	2850	M	Y
2024-05-27	3855988	1318230	1983-08-28 04:25:46	Follow up US	Finalized	Present	2024-06-13	92.6	340.4	345.1	69.2		William Wilson MD	Apoorva Kota, RDMS	2024-06-10	3580	F	Y
2024-05-27	3765318	1345350	1992-09-28 22:53:54	Follow up US	Finalized	Present	2024-06-29	89.8	324.5	297.2	64.7	female	Jackie Jackson MD	Jessica Yuan, RDMS	2024-06-26	3330	F	Y
2024-05-27	3536664	1499606	1984-07-17 01:59:31	Comp Detailed US	Finalized	Present	2024-10-21	41	159.2	132.6	28	male	William Wilson MD	Jessica Yuan, RDMS	2024-10-19	3250	M	Y
2024-05-27	3732211	1619653	1987-08-07 04:59:31	Follow up US	Finalized	Present	2024-06-22	85	322.3	318.1	70	female	Jackie Jackson MD	Estefania Traun, RDMS	2024-05-31	3045	F	Y
2024-05-29	3771822	391971	1985-06-19 18:49:13	Follow up US	Finalized	Present	2024-07-30	86.9	299.4	254.7	60.1	female	Jennifer Jenson MD	Jessica Yuan, RDMS	2024-07-25	3100	F	Y
2024-05-29	3862254	902551	1987-11-22 03:49:13	Follow up US	Finalized	Present	2024-07-10	79.8	310.7	296.8	65.2		Jackie Jackson MD	Laura Gavva, RDMS	2024-07-06	3240	M	Y
2024-05-29	3395166	1989468	1985-03-26 19:41:15	Follow up US	Finalized	Present	2024-08-22	72.8	260.1	240.7	50	female	William Wilson MD	Apoorva Kota, RDMS	2024-07-11	2080	F	Y
2024-05-30	3849318	285322	1999-01-19 07:59:31	Follow up US	Finalized	Present	2024-06-21	92.2	328	333.6	68.2		Fred Fredriskson MD	Apoorva Kota, RDMS	2024-06-02	3270	M	Y
2024-05-30	3738738	356357	1993-08-14 17:24:50	Follow up US	Finalized	Present	2024-06-23	93.6	340.8	322.6	69.8	male	William Wilson MD	Estefania Traun, RDMS	2024-06-02	3185	M	Y
2024-05-30	3834235	1487392	2001-02-04 20:00:56	Follow up US	Finalized	Present	2024-06-20	92.5	339.5	353.8	76.1	female	Jackie Jackson MD	Apoorva Kota, RDMS	2024-06-16	3590	F	Y
2024-05-31	3503278	858643	1994-04-07 13:37:01	Follow up US	Finalized	Present	2024-07-29	75.6	287	267.2	60	male	William Wilson MD	Apoorva Kota, RDMS	2024-07-24	3090	M	Y
2024-05-31	3817019	1075108	1989-03-21 22:14:31	Comp Detailed US	Finalized	Present	2024-11-11	37.6	141.5	113.3	24.6	male	William Wilson MD	Jessica Yuan, RDMS	2024-11-01	3475	M	Y
2024-05-31	3216335	1618121	1985-11-18 15:45:00	Follow up US	Finalized	Present	2024-06-15	92.1	337.8	336	75.3		Jackie Jackson MD	Tania Smith, RDMS	2024-06-26	4190	M	Y
2024-05-31	3697302	1771642	1990-02-11 14:27:39	Follow up US	Finalized	Present	2024-07-09	89.2	319.6	290.6	72.2		Jackie Jackson MD	Tania Smith, RDMS	2024-07-03	3000	M	Y
2024-06-01	3586285	112395	1992-08-31 00:26:43	Comp Detailed US	Finalized	Present	2024-10-26	40.7	160.4	146.7	29.3	female	Fred Fredriskson MD	Apoorva Kota, RDMS	2024-10-14	3270	F	Y
2024-06-01	3740732	265402	1984-01-22 03:00:00	Follow up US	Finalized	Present	2024-09-03	70.6	255.7	238.9	53.4	male	William Wilson MD	Vicky Martinez, RDMS	2024-08-11	2940	M	Y
2024-06-01	3529926	381505	1989-07-14 19:15:56	Follow up US	Finalized	Present	2024-09-22	57	222.5	199.9	45.7	male	Jackie Jackson MD	Vicky Martinez, RDMS	2024-09-08	3300	M	Y
2024-06-01	3816457	664593	1988-09-26 23:43:07	Follow up US	Finalized	Present	2024-08-23	74.8	267.6	244.2	54.6	male	William Wilson MD	Tania Smith, RDMS	2024-08-17	3495	M	Y
2024-06-01	3738994	818581	1991-01-23 11:05:09	Comp Detailed US	Finalized	Present	2024-10-26	44.8	167.4	143.8	31.5	male	Jackie Jackson MD	Tania Smith, RDMS	2024-10-23	3785	M	Y
2024-06-01	3661755	899763	1989-07-25 19:20:09	Comp Detailed US	Finalized	Present	2024-10-23	44.7	167.8	136.1	32.1	female	Jackie Jackson MD	Apoorva Kota, RDMS	2024-10-22	3670	F	Y
2024-06-01	3465064	985389	1987-05-03 06:39:22	Follow up US	Finalized	Present	2024-07-26	79.9	283.3	276	59.5	female	Jackie Jackson MD	Jessica Yuan, RDMS	2024-06-28	2550	F	Y
2024-06-01	3873582	1339519	1985-02-05 20:24:50	Follow up US	Finalized	Present	2024-06-28	90.2	342.4	306.3	67.9		William Wilson MD	Jessica Yuan, RDMS	2024-06-16	3270	M	Y
2024-06-01	3883165	1682771	1986-01-13 13:59:31	Follow up US	Finalized	Present	2024-06-29	81.2	297	299.7	66.1		Jackie Jackson MD	Vicky Martinez, RDMS	2024-06-04	2440	F	Y
2024-06-02	3872152	186385	1990-02-20 13:31:24	Follow up US	Finalized	Present	2024-06-23	85.4	314	317.2	70.9		Fred Fredriskson MD	Apoorva Kota, RDMS	2024-06-14	3020	F	Y
2024-06-02	3471737	323198	1992-11-21 22:08:54	Follow up US	Finalized	Present	2024-07-23	87.7	323.5	290.7	64.8	female	Jackie Jackson MD	Estefania Traun, RDMS	2024-07-14	3390	F	Y
2024-06-02	3884235	933264	1990-09-01 11:05:09	Follow up US	Finalized	Present	2024-07-24	83.1	291.5	236.5	51.2		Jackie Jackson MD	Jessica Yuan, RDMS	2024-06-13	1460	M	Y
2024-06-02	3586336	1373529	1990-06-22 12:14:03	Follow up US	Finalized	Present	2024-07-28	74.5	290.1	266.9	59.8		William Wilson MD	Jessica Yuan, RDMS	2024-07-04	2520	F	Y
2024-06-02	3871542	1793189	1992-04-04 02:02:20	Follow up US	Finalized	Present	2024-07-30	81.8	309.4	275.3	62.3	male	William Wilson MD	Jessica Yuan, RDMS	2024-07-24	4000	M	Y
2024-06-02	3881689	1801243	1983-09-12 06:32:20	Comp Detailed US	Finalized	Present	2024-10-02	57.5	204.3	182.1	40.4	male	Jennifer Jenson MD	Deepa Yow, RDMS	2024-09-20	3490	M	Y
2024-06-03	3733845	1262930	1988-11-21	Comp Detailed US	Finalized	Present	2024-10-24	48.9	177.6	143	31.7	male	Jackie Jackson MD	Jessica Yuan, RDMS	2024-10-31	3660	M	Y
2024-06-03	3799124	1954664	1990-07-07 12:30:56	Follow up US	Finalized	Present	2024-07-23	82.7	294.5	279.9	61.3	female	William Wilson MD	Jessica Yuan, RDMS	2024-07-16	3100	F	Y
2024-06-04	3314842	370817	1997-08-30 17:52:58	Follow up US	Finalized	Present	2024-07-30	78.8	288.5	270.5	61	male	William Wilson MD	Vicky Martinez, RDMS	2024-08-03	2880	M	Y
2024-06-05	3777887	646904	1995-07-03 07:38:26	Follow up US	Finalized	Present	2024-10-04	60.7	215.4	177.9	42.8	male	William Wilson MD	Natalie Serano, RDMS	2024-09-15	2460	M	Y
2024-06-05	3797441	984522	1999-08-08 06:16:52	Follow up US	Finalized	Present	2024-08-20	75.1	277.2	240.7	55.8		Fred Fredriskson MD	Tania Smith, RDMS	2024-08-10	3050	M	Y
2024-06-05	3885409	1959415	1986-06-13 12:26:43	Follow up US	Finalized	Present	2024-07-23	82.3	310.6	290.9	66.3		Fred Fredriskson MD	Jessica Yuan, RDMS	2024-07-21	2950	M	Y
2024-06-06	3829855	201446	1995-09-18 07:06:05	Comp Detailed US	Finalized	Present	2024-10-30	41.1	160.6	130.4	29.8	female	Jennifer Jenson MD	Tania Smith, RDMS	2024-10-31	3350	F	Y
2024-06-06	3780883	290007	1985-01-29 21:43:35	Comp Basic US	Finalized	Present	2024-08-16	77.3	280.1	265.3	57.1	female	Fred Fredriskson MD	Natalie Serano, RDMS	2024-08-10	3480	F	Y
2024-06-06	3832858	335604	1992-09-15 00:21:05	Follow up US	Finalized	Present	2024-09-27	59.2	223.3	204.3	41.6		Jennifer Jenson MD	Apoorva Kota, RDMS	2024-09-16	3320	F	Y
2024-06-06	3874194	1140045	1989-11-08 16:39:50	Comp Basic US	Finalized	Present	2024-08-15	82.8	290.7	251.1	54.3	male	Fred Fredriskson MD	Vicky Martinez, RDMS	2024-08-10	3180	M	Y
2024-06-06	3770197	1442817	1986-04-20 14:36:05	Follow up US	Finalized	Present	2024-08-25	71.5	279.6	239.7	55.7		William Wilson MD	Angelica Zunj, RDMS	2024-08-18	3190	F	Y
2024-06-06	3270502	1948298	1991-08-28 05:15:00	Comp Basic US	Finalized	Present	2024-07-29	74.5	273.2	259.5	52.1	female	Fred Fredriskson MD	Vicky Martinez, RDMS	2024-07-08	2270	F	Y
2024-06-07	3798972	459230	1995-03-31 08:54:22	Comp Detailed US	Finalized	Present	2024-10-16	49	182.5	165.6	37.5	female	William Wilson MD	Tania Smith, RDMS	2024-10-08	3640	F	Y
2024-06-07	3820723	606429	1987-02-05 09:50:37	Follow up US	Finalized	Present	2024-09-07	68.9	242.5	194.9	47.6	female	Jennifer Jenson MD	Deepa Yow, RDMS	2024-08-17	2120	F	Y
2024-06-07	3632221	881566	1982-09-25 12:37:58	Comp Detailed US	Finalized	Present	2024-10-31	45.3	166.3	141.1	30.3	male	Jennifer Jenson MD	Estefania Traun, RDMS	2024-10-28	3910	M	Y
2024-06-07	3841472	977407	1997-07-19 19:42:39	Comp Detailed US	Finalized	Present	2024-10-19	48.7	180.1	167.8	35.6	male	Fred Fredriskson MD	Apoorva Kota, RDMS	2024-10-05	3290	M	Y
2024-06-07	3842693	1045713	1991-07-31 08:07:58	Comp Detailed US	Finalized	Present	2024-10-31	42.2	158.9	134.7	27.3	female	William Wilson MD	Natalie Serano, RDMS	2024-11-02	2960	F	Y
2024-06-07	3815543	1270690	1987-06-26 07:58:07	Comp Detailed US	Finalized	Present	2024-10-25	46.4	175.7	149.4	32.2	male	William Wilson MD	Angelica Zunj, RDMS	2024-10-22	3600	M	Y
2024-06-07	3615754	1697624	1975-06-15 08:05:09	Fetal Echo	Finalized	Present	2024-09-26	57.4	221	191.3	45.6		Fred Fredriskson MD	Estefania Traun, RDMS	2024-09-08	2980	F	Y
2024-06-08	3911548	913853	1989-08-25 17:34:41	Comp Basic US	Finalized	Present	2024-07-17	81.8	309.6	288.8	62.8		William Wilson MD	Juana Manadeva, RDMS	2024-07-11	3250	F	Y
2024-06-08	3708924	1418634	1987-01-31 08:37:30	Follow up US	Finalized	Present	2024-08-19	71.3	272.1	251.9	58.4		Fred Fredriskson MD	Estefania Traun, RDMS	2024-07-27	2550	F	Y
2024-06-08	3780323	1515457	1986-03-05 15:11:15	Follow up US	Finalized	Present	2024-09-10	68.3	251.9	237.5	48.3		Fred Fredriskson MD	Apoorva Kota, RDMS	2024-08-30	3115	M	Y
2024-06-08	3852580	1680951	1985-05-01 19:20:09	Follow up US	Revised	Present	2024-07-05	96.4	345.2	321.5	66.6		Fred Fredriskson MD	Natalie Serano, RDMS	2024-06-29	3480	F	Y
2024-06-08	3314639	1739053	1981-01-27 21:36:33	Follow up US	Finalized	Present	2024-08-30	67.5	253.8	234.2	53.7	female	Fred Fredriskson MD	Apoorva Kota, RDMS	2024-08-03	2460	F	Y
2024-06-08	3751328	1806190	1993-11-01 17:45:56	Comp Detailed US	Finalized	Present	2024-10-31	43.2	162.4	136.7	26.5	male	Jennifer Jenson MD	Jessica Yuan, RDMS	2024-10-14	3200	M	Y
2024-06-08	3796682	1872335	1987-07-29 05:41:43	Follow up US	Finalized	Present	2024-06-24	88.1	325	322.5	74.3		William Wilson MD	Natalie Serano, RDMS	2024-06-24	3320	F	Y
2024-06-09	3631708	1074729	1992-05-23 02:06:33	Comp Detailed US	Finalized	Present	2024-10-25	44.6	175.4	150.1	30.9	male	William Wilson MD	Jessica Yuan, RDMS	2024-10-19	3800	M	Y
2024-06-09	3343176	1557920	1990-02-15 14:30:28	Follow up US	Finalized	Present	2024-06-24	94.7	339.1	370.6	72.4		Fred Fredriskson MD	Estefania Traun, RDMS	2024-06-29	4130	M	Y
2024-06-09	3826233	1588871	1984-09-18 00:40:46	Follow up US	Finalized	Present	2024-09-29	63.1	226.4	200.3	41.6		Fred Fredriskson MD	Apoorva Kota, RDMS	2024-09-20	3910	M	Y
2024-06-09	3809836	1590420	1990-05-23 14:50:09	Comp Detailed US	Finalized	Present	2024-10-26	45.9	173.7	156.1	32.8	male	Fred Fredriskson MD	Vicky Martinez, RDMS	2024-10-20	3690	M	Y
2024-06-10	3827863	604209	1982-08-07 12:37:58	Comp Basic US	Finalized	Present	2024-10-20	45.6	172.7	149.6	29.6	male	Fred Fredriskson MD	Estefania Traun, RDMS	2024-09-17	1665	M	Y
2024-06-10	3851253	1069890	1990-01-21 14:43:07	Follow up US	Finalized	Present	2024-07-08	85.8	312.2	278.5	66.8		Fred Fredriskson MD	Vicky Martinez, RDMS	2024-06-29	2420	M	Y
2024-06-10	3796123	1497839	1999-01-04 09:00:00	Follow up US	Finalized	Present	2024-07-26	78.7	294.1	282.1	60.8		Fred Fredriskson MD	Jessica Yuan, RDMS	2024-07-17	3080	F	Y
2024-06-10	3378588	1782408	1985-03-25 19:53:54	Follow up US	Finalized	Present	2024-07-30	80	304.9	288.6	64.3	male	Jennifer Jenson MD	Estefania Traun, RDMS	2024-07-24	2850	F	Y
2024-06-10	3855378	1929953	1989-12-16 15:40:46	Follow up US	Finalized	Present	2024-07-08	84	313.7	331.8	70.3		William Wilson MD	Estefania Traun, RDMS	2024-06-20	3140	F	Y
2024-06-11	3877713	61329	2000-07-22 23:47:20	Follow up US	Finalized	Present	2024-06-30	91.6	326.7	325.4	71.1	female	Andrea Anderson MD	Vicky Martinez, RDMS	2024-06-22	3790	F	Y
2024-06-12	3668214	23450	1993-05-07 20:50:09	Comp Detailed US	Finalized	Present	2024-11-07	42.8	158.2	144.6	29	female	Andrea Anderson MD	Angelica Zunj, RDMS	2024-11-09	3210	F	Y
2024-06-12	3865418	363893	1989-12-08 17:24:50	Comp Detailed US	Finalized	Present	2024-11-06	45.6	164.5	148	30.7	female	Fred Fredriskson MD	Vicky Martinez, RDMS	2024-10-15	3150	F	Y
2024-06-12	3920220	765584	1988-05-23 01:15:56	Follow up US	Revised	Present	2024-08-26	73.4	264.5	254.5	56		Fred Fredriskson MD	Laura Gavva, RDMS	2024-08-05	2960	M	Y
2024-06-12	3664397	965738	1991-02-08 08:41:43	Follow up US	Finalized	Present	2024-09-01	76.2	265	237.9	57	male	Andrea Anderson MD	Angelica Zunj, RDMS	2024-08-05	2630	M	Y
2024-06-13	3810906	982983	1985-03-11 22:21:33	Comp Detailed US	Finalized	Present	2024-11-07	43.4	152.9	126.3	30.6	male	Andrea Anderson MD	Natalie Serano, RDMS	2024-11-02	3275	M	Y
2024-06-13	3920322	990199	1993-05-04 21:47:48	Comp Basic US	Finalized	Present	2024-12-03	31.1	119.6	89.2	18.6	female	Fred Fredriskson MD	Estefania Traun, RDMS	2024-11-14	2640	F	Y
2024-06-13	3818391	1194127	1983-04-29 07:06:05	Follow up US	Finalized	Present	2024-06-29	90.7	332.9	317.6	70.6	male	Jennifer Jenson MD	Apoorva Kota, RDMS	2024-06-19	2780	M	Y
2024-06-13	3925053	1261634	1988-12-24 21:57:39	Comp Basic US	Finalized	Present	2024-08-08	86.2	297.3	261.8	61.4	female	Jennifer Jenson MD	Veronica Macias, RDMS	2024-07-19	2800	F	Y
2024-06-13	3838414	1418855	1990-06-01 12:14:03	Follow up US	Finalized	Present	2024-07-06	90.7	328.7	341.2	75.2		Fred Fredriskson MD	Tania Smith, RDMS	2024-06-14	3000	F	Y
2024-06-13	3875727	1543187	1990-10-02 11:26:15	Comp Basic US	Finalized	Present	2024-08-16	77.9	280.2	259.7	61.2	female	Jackie Jackson MD	Natalie Serano, RDMS	2024-08-11	3475	F	Y
2024-06-14	3200661	253361	1986-10-08 10:30:00	Follow up US	Finalized	Present	2024-07-02	92.2	326.4	334.4	70.7		Jennifer Jenson MD	Veronica Macias, RDMS	2024-07-01	3310	M	Y
2024-06-14	3709589	267559	1995-06-15 08:47:20	Comp Detailed US	Finalized	Present	2024-11-08	42.8	165.2	146.9	29.9	female	Jennifer Jenson MD	Estefania Traun, RDMS	2024-10-31	3090	F	Y
2024-06-14	3930459	470543	1999-04-04 09:21:05	Comp Detailed US	Finalized	Present	2024-11-15	37	145	125.2	26.6	male	Jennifer Jenson MD	Veronica Macias, RDMS	2024-11-07	3290	M	Y
2024-06-14	3760212	564537	1992-10-11 00:28:07	Comp Detailed US	Finalized	Present	2024-10-30	46.3	173.9	154.2	35.8	male	Jennifer Jenson MD	Natalie Serano, RDMS	2024-10-28	3420	M	Y
2024-06-14	3812788	1149788	1990-04-02 14:13:35	Follow up US	Finalized	Present	2024-08-23	80.2	277.8	270.5	59.5		Fred Fredriskson MD	Vicky Martinez, RDMS	2024-08-19	3465	M	Y
2024-06-14	3877815	1165578	1988-03-23 02:57:11	Follow up US	Finalized	Present	2024-10-07	61.7	237.7	188.4	48.4		Fred Fredriskson MD	Tania Smith, RDMS	2024-09-04	3250	M	Y
2024-06-14	3864444	1396853	1986-06-18 13:52:30	Comp Detailed US	Finalized	Present	2024-10-31	51.2	186	163.3	34.4	male	Andrea Anderson MD	Vicky Martinez, RDMS	2024-10-11	3470	M	Y
2024-06-15	3831789	725201	1980-10-18 00:20:23	Follow up US	Finalized	Present	2024-10-14	57	212.6	187.4	41.8	male	Jackie Jackson MD	Vicky Martinez, RDMS	2024-09-29	3400	M	Y
2024-06-15	3617641	1417740	1981-10-08 18:26:00	Comp Detailed US	Finalized	Present	2024-10-31	48.1	180.7	150.4	33.6	male	Jackie Jackson MD	Angelica Zunj, RDMS	2024-10-28	3555	M	Y
2024-06-15	3658546	1941391	1989-11-24 17:10:46	Comp Detailed US	Finalized	Present	2024-11-02	43.6	170.5	148.3	31.3	female	Jennifer Jenson MD	Apoorva Kota, RDMS	2024-10-16	2920	F	Y
2024-06-16	3945933	363317	1987-12-23 03:52:01	Comp Basic US	Finalized	Present	2024-08-19	77.1	275.5	251	53.1		Jennifer Jenson MD	Leticia Castro, RDMS	2024-08-06	2420	F	Y
2024-06-16	3609750	455479	1989-11-20 16:59:31	Follow up US	Revised	Present	2024-10-06	56	210.5	177.5	41.7		Fred Fredriskson MD	Apoorva Kota, RDMS	2024-09-19	3175	F	Y
2024-06-16	3930815	1370060	1995-12-30 04:25:46	Comp Basic US	Finalized	Present	2024-08-29	76.8	268.9	247.4	51.5	female	Jennifer Jenson MD	Natalie Serano, RDMS	2024-08-25	3160	F	Y
2024-06-16	3857109	1625134	1993-05-06 19:46:52	Follow up US	Finalized	Present	2024-08-14	78.5	284.7	314.9	63.9	male	Jackie Jackson MD	Apoorva Kota, RDMS	2024-07-21	3690	M	Y
2024-06-17	3784549	44720	1987-09-18 06:25:18	Comp Detailed US	Finalized	Present	2024-11-04	46.9	174.8	149.5	30.9	female	Jackie Jackson MD	Natalie Serano, RDMS	2024-10-15	3560	F	Y
2024-06-17	3278714	1484350	1978-05-06 13:03:59	Follow up US	Finalized	Present	2024-07-15	90.8	322.6	303.3	68.7		Fred Fredriskson MD	Vicky Martinez, RDMS	2024-07-13	3690	F	Y
2024-06-17	3855581	1929953	1989-12-08 15:40:46	Follow up US	Finalized	Present	2024-07-08	88.5	318.5	335.6	69.8		Jackie Jackson MD	Angelica Zunj, RDMS	2024-06-20	3140	F	Y
2024-06-18	3684145	197098	1996-07-14 01:41:15	Comp Detailed US	Finalized	Present	2024-11-11	43	158.1	136.4	30.6	female	William Wilson MD	Apoorva Kota, RDMS	2024-11-07	3030	F	Y
2024-06-18	3827403	425166	1994-11-19 10:00:28	Follow up US	Finalized	Present	2024-07-10	94.5	331.3	335.1	71.5	male	William Wilson MD	Apoorva Kota, RDMS	2024-06-22	3250	M	Y
2024-06-18	3948272	752442	2006-02-01 14:40:18	Follow up US	Finalized	Present	2024-07-31	81.9	280.9	276.3	64.5		Andrea Anderson MD	Vicky Martinez, RDMS	2024-07-08	2400	F	Y
2024-06-18	3952514	1542144	1990-05-13 13:56:43	Comp Basic US	Finalized	Present	2024-08-13	86.5	299.6	296.9	64.8	female	Andrea Anderson MD	Apoorva Kota, RDMS	2024-08-08	3520	F	Y
2024-06-19	3930000	94782	1986-02-10 14:26:15	Follow up US	Revised	Present	2024-08-03	81.9	304.2	273.8	66.6	female	Jennifer Jenson MD	Deepa Yow, RDMS	2024-07-14	2540	F	Y
2024-06-19	3641036	352253	1999-01-23 19:42:39	Follow up US	Finalized	Present	2024-10-15	55.6	217.3	182	42.5	male	William Wilson MD	Tania Smith, RDMS	2026-04-26	3755	F	Y
2024-06-19	3750209	530285	1991-09-23 07:13:07	Comp Detailed US	Finalized	Present	2024-11-07	45.1	174.3	142.5	33.9	female	Jennifer Jenson MD	Deepa Yow, RDMS	2024-11-02	3160	F	Y
2024-06-19	3946234	854451	1989-08-18 17:34:41	Follow up US	Finalized	Present	2024-08-15	80.6	297.3	297.5	60.5	female	Jennifer Jenson MD	Deepa Yow, RDMS	2024-08-09	3765	F	Y
2024-06-19	3953834	985389	1987-06-25 06:39:22	Follow up US	Finalized	Present	2024-07-25	87.6	311.4	306.4	61.4	female	Jennifer Jenson MD	Deepa Yow, RDMS	2024-06-26	2550	F	Y
2024-06-19	3559324	1314698	1992-12-02 21:50:37	Follow up US	Finalized	Present	2024-08-15	80.4	282.6	285.2	63.6	female	Andrea Anderson MD	Vicky Martinez, RDMS	2024-08-06	3510	F	Y
2024-06-19	3841317	1972935	1985-06-12 18:25:18	Follow up US	Finalized	Present	2024-08-14	81.8	295.8	275.1	66.5	female	Andrea Anderson MD	Tania Smith, RDMS	2024-07-16	2620	F	Y
2024-06-20	3964226	258398	1986-08-29 11:05:09	Comp Basic US	Finalized	Present	2024-07-22	85.5	293.3	300	69.1		William Wilson MD	Laura Gavva, RDMS	2024-06-24	2430	M	Y
2024-06-20	3965034	321726	1986-07-21 11:29:03	Comp Basic US	Finalized	Present	2024-08-22	75.9	294.2	270.5	59.4	male	William Wilson MD	Laura Gavva, RDMS	2024-06-23	1965	M	Y
2024-06-20	3840301	368537	1990-11-03 09:57:39	Follow up US	Finalized	Present	2024-07-16	85.9	319.5	322.5	69.2	female	Andrea Anderson MD	Apoorva Kota, RDMS	2024-06-28	2870	F	Y
2024-06-20	3260107	649562	1991-03-24 08:12:11	Follow up US	Finalized	Present	2024-08-14	76.3	284.4	272.8	63.2		Andrea Anderson MD	Angelica Zunj, RDMS	2024-08-07	3120	F	Y
2024-06-20	3841420	1042086	1987-02-22 09:02:48	Follow up US	Revised	Present	2024-08-13	88.8	304.3	298.4	60.2	male	Andrea Anderson MD	Vicky Martinez, RDMS	2024-08-08	3990	M	Y
2024-06-21	3946285	73924	1976-01-13 02:48:02	Follow up US	Finalized	Present	2024-06-26	92.3	347.8	332.8	71.4		Jennifer Jenson MD	Deepa Yow, RDMS	2024-06-25	3120	M	Y
2024-06-21	3782967	229813	1989-10-12 19:03:16	Comp Detailed US	Finalized	Present	2024-11-13	44.3	162.4	147.1	33.2	female	William Wilson MD	Apoorva Kota, RDMS	2024-11-14	2840	F	Y
2024-06-21	3856344	300419	1988-06-03 02:45:56	Comp Detailed US	Finalized	Present	2024-11-09	44.7	167.9	149.1	34.7	male	William Wilson MD	Tania Smith, RDMS	2024-11-09	3720	M	Y
2024-06-21	3886175	1012229	1986-09-17 12:33:45	Comp Detailed US	Finalized	Present	2024-11-03	49.7	179.1	166	32.5	male	Jennifer Jenson MD	Deepa Yow, RDMS	2024-10-23	2970	M	Y
2024-06-21	3869451	1018331	1989-03-03 20:00:56	Follow up US	Finalized	Present	2024-08-12	82.7	295.3	283.9	64.1	male	Jackie Jackson MD	Apoorva Kota, RDMS	2024-07-25	3120	M	Y
2024-06-21	3877866	1373529	1990-06-11 12:14:03	Follow up US	Finalized	Present	2024-07-26	84.2	301.5	295.1	68.4		Jackie Jackson MD	Tania Smith, RDMS	2024-07-06	2520	F	Y
2024-06-21	3929289	1593172	1988-04-17 01:39:50	Comp Detailed US	Finalized	Present	2024-08-13	85	308.3	291.4	62	female	William Wilson MD	Veronica Macias, RDMS	2024-08-15	3840	F	Y
2024-06-21	3962042	1620563	1981-06-09 19:02:34	Comp Basic US	Finalized	Present	2024-08-07	88.6	321.3	324.9	64	male	William Wilson MD	Angelica Zunj, RDMS	2024-08-01	4260	M	Y
2024-06-21	3913372	1854108	2000-05-31 02:31:52	Comp Detailed US	Finalized	Present	2024-11-11	45	169.7	140	29.1	male	Andrea Anderson MD	Veronica Macias, RDMS	2024-11-13	3390	M	Y
2024-06-22	3851967	109345	2002-06-10 13:21:33	Follow up US	Finalized	Present	2024-08-16	82.1	292.8	273.8	64.2	male	Andrea Anderson MD	Natalie Serano, RDMS	2024-08-01	2680	M	Y
2024-06-22	3971446	230489	1985-08-04 18:02:48	Follow up US	Finalized	Present	2024-07-16	86.5	322.7	299	66.4		William Wilson MD	Matthea Gregorio, RDMS	2024-06-29	2740	F	Y
2024-06-22	3708721	427093	1990-01-25 17:06:33	Comp Detailed US	Finalized	Present	2024-11-15	44.7	163	134	26.3	female	Jackie Jackson MD	Natalie Serano, RDMS	2024-11-12	2980	F	Y
2024-06-22	3926587	472709	1990-03-31 13:38:26	Comp Basic US	Finalized	Present	2024-07-07	93.7	326.8	294.8	68.2	male	Jennifer Jenson MD	Veronica Macias, RDMS	2024-06-20	2670	M	Y
2024-06-22	3863476	564786	1988-04-03 01:24:22	Follow up US	Finalized	Present	2024-07-20	91.2	326.9	316.8	70		Andrea Anderson MD	Apoorva Kota, RDMS	2024-07-13	3450	F	Y
2024-06-22	3827097	1063838	1980-01-17 05:00:14	Comp Detailed US	Finalized	Present	2024-11-15	44.6	164.8	148.5	31.1	male	Andrea Anderson MD	Natalie Serano, RDMS	2024-11-09	3380	M	Y
2024-06-22	3739765	1653497	1987-05-21 08:45:56	Comp Detailed US	Finalized	Present	2024-11-11	46	178.2	160.3	33.3	female	William Wilson MD	Veronica Macias, RDMS	2024-10-30	3200	F	Y
2024-06-22	3852631	1726851	1991-12-24 03:42:11	Follow up US	Finalized	Present	2024-07-21	86.6	314	301.8	68.4	male	Jackie Jackson MD	Tania Smith, RDMS	2024-07-19	2850	M	Y
2024-06-22	3895607	1805513	1996-09-01 01:27:11	Comp Detailed US	Finalized	Present	2024-11-16	45.6	167.2	127.7	31.7	female	William Wilson MD	Vicky Martinez, RDMS	2024-11-14	3380	F	Y
2024-06-23	3761493	94098	2003-04-24 09:29:31	Comp Detailed US	Finalized	Present	2024-11-15	46.9	169.2	147.8	28.2	male	William Wilson MD	Natalie Serano, RDMS	2024-10-25	3200	M	Y
2024-06-25	3862506	548266	1983-12-18 05:58:35	Comp Detailed US	Finalized	Present	2024-12-10	36.4	132.8	112.8	21.5	male	William Wilson MD	Apoorva Kota, RDMS	2024-12-01	3505	M	Y
2024-06-25	3976338	604209	1982-09-06 12:37:58	Follow up US	Finalized	Present	2024-10-21	51.6	199.4	168.4	31.7	male	Jennifer Jenson MD	Apoorva Kota, RDMS	2024-09-19	1665	M	Y
2024-06-25	3530795	826000	1983-05-29 07:30:00	Follow up US	Finalized	Present	2024-09-21	74.8	269	242.5	51.3		Fred Fredriskson MD	Vicky Martinez, RDMS	2024-09-08	3420	M	Y
2024-06-25	3792901	1408707	1986-01-19 16:32:48	Comp Detailed US	Finalized	Present	2024-11-17	46.3	170.9	154.8	28.9	male	William Wilson MD	Angelica Zunj, RDMS	2024-11-10	3290	M	Y
2024-06-25	3815491	1965544	1992-05-06 03:00:00	Comp Detailed US	Finalized	Present	2024-11-20	44.5	171.5	155.3	30.8	female	William Wilson MD	Veronica Macias, RDMS	2024-11-10	3420	F	Y
2024-06-26	3600148	455976	1984-09-06 23:47:20	Comp Basic US	Finalized	Present	2024-08-19	82.5	294.3	258.9	59.5	male	William Wilson MD	Angelica Zunj, RDMS	2024-08-12	2640	M	Y
2024-06-26	3778040	855867	1984-10-29 00:09:50	Comp Detailed US	Revised	Present	2024-11-22	45.9	164.5	129.7	36.7	male	Fred Fredriskson MD	Tania Smith, RDMS	2024-11-05	2440	M	Y
2024-06-26	3632322	881566	1982-09-11 12:37:58	Fetal Echo	Finalized	Present	2024-11-01	51.6	207.7	177.9	39.2	male	Jennifer Jenson MD	Deepa Yow, RDMS	2024-10-29	3910	M	Y
2024-06-26	3981032	1380690	1984-06-17 02:45:56	Comp Detailed US	Finalized	Present	2024-11-15	47.6	169	150	37.6	female	Fred Fredriskson MD	Apoorva Kota, RDMS	2024-10-26	2806	F	Y
2024-06-26	3892602	1468521	1984-01-20 05:17:48	Follow up US	Finalized	Present	2024-11-19	45.3	162.5	132	27.6	male	William Wilson MD	Angelica Zunj, RDMS	2024-11-14	3230	M	Y
2024-06-26	3892244	1948298	1991-09-13 05:15:00	Follow up US	Finalized	Present	2024-07-30	84.2	299.2	276.4	60.4	female	William Wilson MD	Apoorva Kota, RDMS	2024-07-10	2270	F	Y
2024-06-26	3982769	1989468	1985-04-10 19:41:15	Comp Basic US	Finalized	Present	2024-08-22	81.3	288	282.1	56	female	Jennifer Jenson MD	Deepa Yow, RDMS	2024-07-10	2080	F	Y
2024-06-27	3986540	159190	1993-12-04 15:57:39	Follow up US	Revised	Present	2024-07-13	92.1	332.6	316.7	70.6	male	William Wilson MD	Deepa Yow, RDMS	2024-07-01	2860	M	Y
2024-06-27	3740783	265402	1984-03-13 03:00:00	Follow up US	Finalized	Present	2024-09-04	81.1	293	291.2	58.4	male	William Wilson MD	Apoorva Kota, RDMS	2024-08-11	2940	M	Y
2024-06-27	3975830	338827	1993-10-02 18:47:48	Comp Detailed US	Revised	Present	2024-11-11	52.3	193.7	147.8	35	male	Jennifer Jenson MD	Deepa Yow, RDMS	2024-11-06	3120	M	Y
2024-06-27	3820876	606429	1987-01-01 09:50:37	Comp Basic US	Finalized	Present	2024-09-05	78.5	266.4	225.8	48.2	female	Fred Fredriskson MD	Vicky Martinez, RDMS	2024-08-16	2120	F	Y
2024-06-27	3890961	858643	1994-04-05 13:37:01	Follow up US	Finalized	Present	2024-07-29	83.3	313.9	308.5	67	male	William Wilson MD	Tania Smith, RDMS	2024-07-23	3090	M	Y
2024-06-27	3813502	1215108	1991-07-20 08:10:46	Comp Detailed US	Finalized	Present	2024-11-15	42.4	169.1	147.4	32.9		Andrea Anderson MD	Tania Smith, RDMS	2024-11-13	3275	F	Y
2024-06-27	3734611	1419073	1990-08-24 13:52:30	Comp Detailed US	Finalized	Present	2024-11-17	42.4	163.2	142.4	31.4	male	Fred Fredriskson MD	Angelica Zunj, RDMS	2024-11-16	3350	M	Y
2024-06-28	3993054	553096	1988-08-24 01:28:35	Comp Detailed US	Finalized	Present	2024-11-27	39.1	151.7	125.9	25.7	male	William Wilson MD	Deepa Yow, RDMS	2024-11-07	2920	M	Y
2024-06-28	3338331	616004	1993-07-23 18:07:01	Follow up US	Finalized	Present	2024-08-15	82.5	303.4	292.4	64.7		Fred Fredriskson MD	Tania Smith, RDMS	2024-08-06	2900	F	Y
2024-06-28	3981338	1098721	1985-09-12 23:22:01	Comp Detailed US	Finalized	Present	2024-11-21	45.2	161.2	142.2	31.9	male	Jennifer Jenson MD	Deepa Yow, RDMS	2025-07-22	2630	M	Y
2024-06-28	3992802	1112027	1996-02-08 02:05:09	Comp Basic US	Finalized	Present	2024-10-15	58.4	226.3	199	41.9		William Wilson MD	Mashairi Bennett, RDMS	2024-07-02	650	F	Y
2024-06-28	3933003	1498858	1995-05-15 09:37:58	Comp Detailed US	Finalized	Present	2024-11-17	44.4	174.3	144.8	29.4	male	Fred Fredriskson MD	Veronica Macias, RDMS	2024-11-17	2650	M	Y
2024-06-28	3886072	1534807	1989-09-02 17:58:35	Follow up US	Finalized	Present	2024-07-29	91.2	321.4	313.9	68.9	male	Fred Fredriskson MD	Tania Smith, RDMS	2024-07-29	3360	M	Y
2024-06-28	3882911	1793189	1992-04-08 02:02:20	Follow up US	Finalized	Present	2024-07-28	93.2	332.7	333.7	70.3	male	Fred Fredriskson MD	Angelica Zunj, RDMS	2024-07-25	4000	M	Y
2024-06-29	3953125	391971	1985-05-30 18:49:13	Follow up US	Finalized	Present	2024-07-31	94.5	317.5	295.9	67.2	female	William Wilson MD	Apoorva Kota, RDMS	2024-07-23	3100	F	Y
2024-06-29	3938351	765182	1991-11-25 06:01:24	Comp Detailed US	Finalized	Present	2024-11-24	43.4	166.8	137.8	30.7	female	Fred Fredriskson MD	Deepa Yow, RDMS	2024-11-22	3130	F	Y
2024-06-29	3685264	960317	1991-10-31 06:19:41	Comp Detailed US	Finalized	Present	2024-11-18	38.1	156.8	137.3	30.6	female	Robbie Robertson DO	Veronica Macias, RDMS	2024-10-25	2285	F	Y
2024-06-29	3332071	1408704	1997-02-04 20:47:20	Follow up US	Finalized	Present	2024-08-22	84	300.2	275.7	62.6	male	Andrea Anderson MD	Angelica Zunj, RDMS	2024-07-28	2810	M	Y
2024-06-29	3911243	1418634	1987-02-25 08:37:30	Follow up US	Finalized	Present	2024-08-18	79.4	299.7	287	60.4		Fred Fredriskson MD	Natalie Serano, RDMS	2024-07-25	2550	F	Y
2024-06-29	3825671	1481323	1997-04-01 22:17:20	Comp Detailed US	Finalized	Present	2024-11-24	42.6	155.3	136.4	28.4	male	Fred Fredriskson MD	Natalie Serano, RDMS	2024-11-23	3610	M	Y
2024-06-29	3697558	1771642	1990-03-04 14:27:39	Follow up US	Finalized	Present	2024-07-08	92	338.1	329.3	73.1		Fred Fredriskson MD	Tania Smith, RDMS	2024-07-02	3000	M	Y
2024-06-29	3985672	1801243	1983-09-02 06:32:20	Follow up US	Finalized	Present	2024-10-02	69.8	256.4	223.7	46.9		Andrea Anderson MD	Vicky Martinez, RDMS	2024-09-21	3490	M	Y
2024-06-30	3909667	201446	1995-09-24 07:06:05	Follow up US	Finalized	Present	2024-10-30	50.5	188.1	168.5	36.2	female	William Wilson MD	Vicky Martinez, RDMS	2024-10-31	3350	F	Y
2024-06-30	3824142	381505	1989-07-30 19:15:56	Follow up US	Finalized	Present	2024-09-22	68.8	274.7	236.4	51.5		Fred Fredriskson MD	Natalie Serano, RDMS	2024-09-07	3300	M	Y
2024-07-01	3759092	976175	1988-09-28 00:28:07	Comp Detailed US	Finalized	Present	2024-11-22	44.5	164.8	143.1	29.1	male	William Wilson MD	Vicky Martinez, RDMS	2024-11-16	3040	M	Y
2024-07-01	3884084	1954664	1990-07-17 12:30:56	Follow up US	Finalized	Present	2024-07-23	94.9	328.8	311.9	73.7		Fred Fredriskson MD	Apoorva Kota, RDMS	2024-07-16	3100	F	Y
2024-07-03	4013056	483059	1994-03-27 13:35:37	Comp Basic US	Finalized	Present	2024-08-28	74.2	284.8	255.5	58.6		Robbie Robertson DO	Matthea Gregorio, RDMS	2024-07-07	1550	F	Y
2024-07-03	3988018	1396853	1986-06-12 13:52:30	F/U Fetal Echo	Finalized	Present	2024-11-01	60.7	220.3	197.4	41.1		Robbie Robertson DO	Vicky Martinez, RDMS	2024-10-12	3470	M	Y
2024-07-04	3977304	358714	1992-09-26 00:11:15	Comp Detailed US	Finalized	Present	2024-11-13	46.4	177.4	168.3	35.8	female	Jennifer Jenson MD	Deepa Yow, RDMS	2024-10-23	2650	F	Y
2024-07-04	3970271	752442	2006-02-14 14:40:18	Follow up US	Finalized	Present	2024-07-31	83.4	293.4	296	65.6		Robbie Robertson DO	Vicky Martinez, RDMS	2024-07-06	2400	F	Y
2024-07-04	3278917	1484350	1978-05-16 13:03:59	Follow up US	Finalized	Present	2024-07-15	97.9	342.2	342.9	78.4		William Wilson MD	Tania Smith, RDMS	2024-07-13	3690	F	Y
2024-07-04	3677426	1927620	1989-05-21 19:46:52	Follow up US	Finalized	Present	2024-08-30	83.5	294.2	274.2	62.9	male	William Wilson MD	Apoorva Kota, RDMS	2024-08-27	3530	M	Y
2024-07-05	3923526	370817	1997-09-02 17:52:58	Follow up US	Finalized	Present	2024-07-30	86.5	309.5	328.6	70.9	male	William Wilson MD	Angelica Zunj, RDMS	2024-08-04	2880	M	Y
2024-07-05	3843608	990199	1993-04-09 21:47:48	Comp Detailed US	Finalized	Present	2024-12-03	41.7	153.9	129.7	26.9	female	Robbie Robertson DO	Apoorva Kota, RDMS	2024-11-14	2640	F	Y
2024-07-05	3901465	1140045	1989-10-17 16:39:50	Follow up US	Finalized	Present	2024-08-15	91	306.9	287.8	64.6		William Wilson MD	Vicky Martinez, RDMS	2024-08-11	3180	M	Y
2024-07-05	3932287	1848795	1987-03-14 08:31:52	Comp Basic US	Finalized	Present	2024-08-29	83.2	294.1	288.3	67.5	male	William Wilson MD	Tania Smith, RDMS	2024-08-25	3360	M	Y
2024-07-06	4034500	426024	1985-05-03 20:52:58	Follow up US	Revised	Present	2024-10-30	60.2	214.5	187.8	44.1		Robbie Robertson DO	Matthea Gregorio, RDMS	2024-10-11	2720	F	Y
2024-07-06	3971191	977407	1997-06-25 19:42:39	Follow up US	Finalized	Present	2024-10-20	63.3	220.5	204.4	41.2	male	William Wilson MD	Vicky Martinez, RDMS	2024-10-04	3290	M	Y
2024-07-06	4028189	979848	1990-02-15 16:52:30	Comp Detailed US	Finalized	Present	2024-11-30	45	160.4	146.9	26.3	male	Robbie Robertson DO	Angelica Zunj, RDMS	2024-11-19	3190	M	Y
2024-07-06	4014579	984522	1999-08-24 06:16:52	Comp Basic US	Finalized	Present	2024-08-21	82.7	296.6	293.9	60.6		Robbie Robertson DO	Apoorva Kota, RDMS	2024-08-09	3050	M	Y
2024-07-06	3970833	1261634	1988-11-09 21:57:39	Follow up US	Finalized	Present	2024-08-06	87.8	315.3	301.3	70.5	female	William Wilson MD	Tania Smith, RDMS	2024-07-20	2800	F	Y
2024-07-06	3980879	1948298	1991-09-20 05:15:00	Follow up US	Finalized	Present	2024-07-29	87.8	308.2	281.5	61.8	female	William Wilson MD	Natalie Serano, RDMS	2024-07-09	2270	F	Y
2024-07-07	3909262	335604	1992-09-10 00:21:05	Follow up US	Finalized	Present	2024-09-25	67.8	268.4	234.5	50		William Wilson MD	Vicky Martinez, RDMS	2024-09-17	3320	F	Y
2024-07-07	3936976	455479	1989-11-07 16:59:31	Comp Basic US	Finalized	Present	2024-10-06	65.6	234.3	208.1	47.3		Robbie Robertson DO	Vicky Martinez, RDMS	2024-09-17	3175	F	Y
2024-07-07	3977508	1453700	1982-01-12 16:11:43	Comp Basic US	Finalized	Present	2024-09-22	73.6	269.8	235.8	50.4	female	Robbie Robertson DO	Tania Smith, RDMS	2024-09-21	3160	F	Y
2024-07-08	4028240	151728	1982-05-01 13:48:59	Comp Basic US	Revised	Present	2024-08-22	89.8	321.4	289	64.3	female	Jennifer Jenson MD	Veronica Macias, RDMS	2024-08-16	3605	F	Y
2024-07-08	3948884	994714	1990-09-03 13:21:33	Comp Detailed US	Finalized	Present	2024-11-29	44.7	165.6	143.1	29.3	female	William Wilson MD	Angelica Zunj, RDMS	2024-11-07	2235	F	Y
2024-07-09	3814114	94782	1986-03-14 14:26:15	Follow up US	Finalized	Present	2024-08-04	81.3	309.7	307.4	72.6	female	Robbie Robertson DO	Vicky Martinez, RDMS	2024-07-14	2540	F	Y
2024-07-10	3792185	12768	1992-11-04 00:30:56	Comp Detailed US	Finalized	Present	2024-12-02	44.7	168.3	149.2	29.8	male	Fred Fredriskson MD	Natalie Serano, RDMS	2024-11-26	3100	M	Y
2024-07-10	3831026	649421	1987-07-08 08:15:00	Comp Detailed US	Finalized	Present	2024-12-01	46.6	183.9	160.6	31.4	male	Robbie Robertson DO	Tania Smith, RDMS	2024-11-23	3240	M	Y
2024-07-10	3920019	965738	1991-02-26 08:41:43	Follow up US	Finalized	Present	2024-09-01	82.2	294.1	284.4	60.6	male	William Wilson MD	Veronica Macias, RDMS	2024-08-07	2630	M	Y
2024-07-10	3883880	1026118	1983-09-08 07:34:13	Comp Detailed US	Revised	Present	2024-12-02	46.8	166.9	141.3	32.1	female	Robbie Robertson DO	Angelica Zunj, RDMS	2024-11-26	2860	F	Y
2024-07-11	4036946	373442	2002-11-23 10:22:58	Follow up US	Finalized	Present	2024-08-11	81.3	296.3	286.7	63		Robbie Robertson DO	Leticia Castro, RDMS	2024-07-14	2245	F	Y
2024-07-11	3912713	398544	1992-02-23 04:28:35	Comp Detailed US	Finalized	Present	2024-11-20	54.1	191.1	164.5	34.2	female	Robbie Robertson DO	Natalie Serano, RDMS	2024-11-18	3775	F	Y
2024-07-11	3744301	576265	2002-06-19 20:29:03	Comp Detailed US	Finalized	Present	2024-12-03	43.4	162.7	145.4	32.3	female	Fred Fredriskson MD	Apoorva Kota, RDMS	2025-11-28	2490	M	Y
2024-07-11	3942221	586765	1992-12-19 23:06:33	Comp Detailed US	Finalized	Present	2024-12-12	38.4	148	125	23.7	male	Andrea Anderson MD	Veronica Macias, RDMS	2024-11-01	2060	M	Y
2024-07-11	3906468	652597	1990-02-05 16:25:46	Comp Detailed US	Finalized	Present	2024-11-23	44.4	175.8	151.7	33.5	male	Robbie Robertson DO	Apoorva Kota, RDMS	2024-11-21	3725	M	Y
2024-07-11	3910532	1045713	1991-07-26 08:07:58	Follow up US	Finalized	Present	2024-10-31	57.8	210	188.9	42.1	female	Andrea Anderson MD	Angelica Zunj, RDMS	2024-11-01	2960	F	Y
2024-07-11	3740478	1203843	1990-03-26 14:13:35	Follow up US	Finalized	Present	2024-08-05	87.7	314	318.9	72		William Wilson MD	Natalie Serano, RDMS	2024-07-30	3290	F	Y
2024-07-11	3604280	1331969	1991-12-03 04:42:39	Follow up US	Revised	Present	2024-09-06	77.5	282.3	276.8	63.2	male	Robbie Robertson DO	Apoorva Kota, RDMS	2024-08-30	3140	M	Y
2024-07-12	4048334	147707	1996-05-19 01:11:43	Comp Basic US	Finalized	Present	2024-08-12	86	314.6	307.7	65.6		William Wilson MD	Leticia Castro, RDMS	2024-07-14	2700	M	Y
2024-07-12	3905037	290007	1985-01-29 21:43:35	Follow up US	Finalized	Present	2024-08-15	85.8	308.5	292.6	67.1	female	William Wilson MD	Vicky Martinez, RDMS	2024-08-12	3480	F	Y
2024-07-12	3893516	563457	2003-05-18 09:40:46	Comp Detailed US	Finalized	Present	2024-12-11	45.2	159.2	137.2	26.1	male	William Wilson MD	Veronica Macias, RDMS	2024-12-06	3400	M	Y
2024-07-12	3868428	943562	1988-02-20 04:49:41	Comp Detailed US	Finalized	Present	2024-11-28	43.4	166.2	143.9	33.8	female	Robbie Robertson DO	Natalie Serano, RDMS	2024-11-30	2675	F	Y
2024-07-12	3938300	1165578	1988-03-08 02:57:11	Follow up US	Revised	Present	2024-10-05	75.9	271.8	246.7	57.1		Fred Fredriskson MD	Vicky Martinez, RDMS	2024-09-04	3250	M	Y
2024-07-12	3478663	1515457	1986-03-26 15:11:15	Follow up US	Finalized	Present	2024-09-08	80.6	289.5	293	56.7		Andrea Anderson MD	Apoorva Kota, RDMS	2024-08-30	3115	M	Y
2024-07-12	3953329	1542144	1990-05-06 13:56:43	Follow up US	Finalized	Present	2024-08-14	90.6	337.8	320	66.7	female	Robbie Robertson DO	Tania Smith, RDMS	2024-08-07	3520	F	Y
2024-07-12	3990057	1588871	1984-08-30 00:40:46	Follow up US	Finalized	Present	2024-09-29	74.3	283.1	254.1	53.2		William Wilson MD	Natalie Serano, RDMS	2024-09-20	3910	M	Y
2024-07-12	4044925	1901380	1988-05-05 03:00:00	Comp Detailed US	Finalized	Present	2024-12-01	48.9	171.9	154.5	28.1	male	Fred Fredriskson MD	Veronica Macias, RDMS	2024-11-10	2535	M	Y
2024-07-12	3875931	1921277	1993-07-09 19:10:18	Follow up US	Finalized	Present	2024-10-05	72.8	264.4	247.1	53.2		Fred Fredriskson MD	Tania Smith, RDMS	2024-09-26	3020	M	Y
2024-07-13	3891371	245399	1981-06-22 20:58:35	Comp Detailed US	Finalized	Present	2024-12-06	46.1	169	144.6	30.2	male	Fred Fredriskson MD	Veronica Macias, RDMS	2024-11-29	3180	M	Y
2024-07-13	4022018	338827	1993-09-21 18:40:46	Follow up US	Finalized	Present	2024-11-02	58.9	216.8	182.2	40.8	male	Jennifer Jenson MD	Veronica Macias, RDMS	2024-11-07	3120	M	Y
2024-07-13	3936672	480534	1993-08-18 19:53:54	Comp Detailed US	Finalized	Present	2024-12-02	49.5	180.4	149.8	33.2	male	Robbie Robertson DO	Veronica Macias, RDMS	2024-11-17	3890	M	Y
2024-07-13	3803304	646904	1995-06-20 07:38:26	Follow up US	Finalized	Present	2024-10-03	78.3	278.8	239.8	53.2	male	William Wilson MD	Apoorva Kota, RDMS	2024-09-15	2460	M	Y
2024-07-13	3842948	943879	1987-02-05 11:02:20	Comp Detailed US	Finalized	Present	2024-12-05	45.4	167.7	140.2	28.5		Robbie Robertson DO	Natalie Serano, RDMS	2024-12-08	3680	F	Y
2024-07-13	4015243	1149788	1990-04-26 14:13:35	Follow up US	Finalized	Present	2024-08-24	87	316	313.3	70.7		Robbie Robertson DO	Veronica Macias, RDMS	2024-08-19	3465	M	Y
2024-07-13	3934481	1543187	1990-08-25 11:26:15	Follow up US	Finalized	Present	2024-08-14	83	306	306.1	70.7		Fred Fredriskson MD	Tania Smith, RDMS	2024-08-10	3475	F	Y
2024-07-13	3943495	1625134	1993-04-13 19:46:52	Follow up US	Finalized	Present	2024-08-14	84	315.2	364.8	71.5	male	Robbie Robertson DO	Apoorva Kota, RDMS	2024-07-22	3690	M	Y
2024-07-13	4049401	1972935	1985-06-27 18:25:18	Follow up US	Finalized	Present	2024-08-14	90	316.3	316.4	64.6		Fred Fredriskson MD	Deepa Yow, RDMS	2024-07-14	2620	F	Y
2024-07-14	3941100	470543	1999-05-07 09:21:05	Follow up US	Revised	Present	2024-11-15	53.7	196.5	174.8	37.9	male	William Wilson MD	Apoorva Kota, RDMS	2024-11-09	3290	M	Y
2024-07-14	3882301	931079	1992-06-23 02:37:30	Comp Detailed US	Finalized	Present	2024-12-05	42.9	156.1	142.4	32.7	male	William Wilson MD	Natalie Serano, RDMS	2024-11-26	3560	M	Y
2024-07-14	3993156	1018331	1989-04-23 20:00:56	Comp Basic US	Finalized	Present	2024-08-13	89.5	315.9	306.5	68		Fred Fredriskson MD	Natalie Serano, RDMS	2024-07-26	3120	M	Y
2024-07-14	3991283	1917852	1989-03-18 20:41:43	Comp Basic US	Finalized	Present	2024-09-06	77.5	295.2	271.8	54.5	male	Fred Fredriskson MD	Veronica Macias, RDMS	2024-08-30	2920	M	Y
2024-07-15	3883012	533503	1993-01-27 23:00:56	Comp Detailed US	Finalized	Present	2024-12-09	45.7	165.6	143.4	26.7	male	Jennifer Jenson MD	Apoorva Kota, RDMS	2024-11-30	3310	M	Y
2024-07-15	4055772	725201	1980-08-29 00:20:23	Follow up US	Finalized	Present	2024-10-13	70.3	261.2	235.6	51.6	male	Robbie Robertson DO	Deepa Yow, RDMS	2024-09-29	3400	M	Y
2024-07-15	4024517	1782408	1985-04-25 19:53:54	Follow up US	Finalized	Present	2024-07-30	92.1	340.5	328.6	70.4		Fred Fredriskson MD	Natalie Serano, RDMS	2024-07-23	2850	F	Y
2024-07-16	4063976	52309	1996-01-29 11:05:09	Follow up US	Finalized	Present	2024-09-02	82.3	301.8	305.8	62.6		Fred Fredriskson MD	Laura Gavva, RDMS	2025-11-15	2880	M	Y
2024-07-16	3994378	1418634	1987-02-10 08:37:30	Follow up US	Finalized	Present	2024-08-19	84.7	316.4	315.2	66		Fred Fredriskson MD	Natalie Serano, RDMS	2024-07-27	2550	F	Y
2024-07-16	4061332	1612425	1998-03-27 14:20:37	Limited US	Finalized	Present	2024-07-11	86.1	327	315.1	65.4		Fred Fredriskson MD	Laura Gavva, RDMS	2024-07-14	3300	M	Y
2024-07-17	3836788	346690	1995-07-31 08:05:09	Comp Detailed US	Finalized	Present	2024-12-12	43.4	159.9	136.7	27.3	female	Andrea Anderson MD	Apoorva Kota, RDMS	2024-12-06	3420	F	Y
2024-07-17	3491664	1042086	1987-01-22 09:02:48	Follow up US	Finalized	Present	2024-08-13	90.6	335.5	347.4	71.1		Jennifer Jenson MD	Tania Smith, RDMS	2024-08-06	3990	M	Y
2024-07-18	4000412	553096	1988-08-26 01:28:35	Follow up US	Finalized	Present	2024-11-27	46.9	192.4	166.7	37.4		Fred Fredriskson MD	Vicky Martinez, RDMS	2024-11-07	2920	M	Y
2024-07-18	4064384	649562	1991-03-07 08:12:11	Follow up US	Finalized	Present	2024-08-12	84.2	310.1	321.9	71.1		Robbie Robertson DO	Angelica Zunj, RDMS	2024-08-06	3120	F	Y
2024-07-18	3957253	917461	1993-04-28 21:29:31	Comp Detailed US	Finalized	Present	2024-12-10	47.8	165.9	138.1	29.3	male	Jennifer Jenson MD	Natalie Serano, RDMS	2024-12-11	3630	M	Y
2024-07-18	4070243	1176970	1987-01-01 09:53:26	Comp Basic US	Finalized	Present	2024-10-10	67.6	260.8	245.1	48.2		Robbie Robertson DO	Matthea Gregorio, RDMS	2024-07-21	1185	M	Y
2024-07-18	4068150	1380690	1984-06-18 02:45:56	Follow up US	Revised	Present	2024-11-16	53.8	206.6	200.9	40.7		Jennifer Jenson MD	Deepa Yow, RDMS	2024-10-26	2806	F	Y
2024-07-18	4062348	1625057	1997-08-03 18:16:52	Comp Basic US	Finalized	Present	2024-09-02	86.3	307	295	57.1	uncertain	Fred Fredriskson MD	Laura Gavva, RDMS	2024-07-20	2260	F	Y
2024-07-18	3433230	1642588	1990-08-07 13:04:41	Follow up US	Revised	Present	2024-09-09	83	301.9	279.2	69.7	male	Robbie Robertson DO	Vicky Martinez, RDMS	2024-09-11	3910	M	Y
2024-07-19	4001939	290873	1996-11-01 23:34:41	Follow up US	Finalized	Present	2024-10-11	73	263.2	238.3	51.5		Fred Fredriskson MD	Vicky Martinez, RDMS	2024-10-01	3250	M	Y
2024-07-19	3959339	352253	1999-02-07 19:42:39	Follow up US	Finalized	Present	2024-10-16	70	273.7	236	53.2		Fred Fredriskson MD	Tania Smith, RDMS	2026-04-25	3755	F	Y
2024-07-19	3981594	604209	1982-07-22 12:37:58	Follow up US	Finalized	Present	2024-10-21	64.6	242.5	205.3	41.4	male	Jennifer Jenson MD	Veronica Macias, RDMS	2024-09-17	1665	M	Y
2024-07-19	3990723	606429	1986-12-25 09:50:37	Follow up US	Finalized	Present	2024-09-05	84	294.3	251.1	58.4		Jennifer Jenson MD	Vicky Martinez, RDMS	2024-08-17	2120	F	Y
2024-07-19	4080947	811452	1989-10-19 17:13:35	Comp Basic US	Finalized	Present	2024-10-05	75.3	273.9	241.8	56.7	female	Jennifer Jenson MD	Kaila Limanjaya, RDMS	2024-09-18	3185	F	Y
2024-07-19	4017535	854451	1989-09-05 17:34:41	Follow up US	Finalized	Present	2024-08-13	88.8	321.6	331.7	70.3	female	Robbie Robertson DO	Natalie Serano, RDMS	2024-08-09	3765	F	Y
2024-07-19	4000464	1151440	1995-07-16 08:23:26	Comp Detailed US	Finalized	Present	2024-11-27	51	184.7	162.7	35.9	male	Robbie Robertson DO	Veronica Macias, RDMS	2024-11-27	3130	M	Y
2024-07-19	4030023	1442817	1986-02-26 14:36:05	Follow up US	Finalized	Present	2024-08-26	86.5	307.4	309.6	69.7		Robbie Robertson DO	Veronica Macias, RDMS	2024-08-19	3190	F	Y
2024-07-19	3962958	1620563	1981-06-29 19:02:34	Follow up US	Finalized	Present	2024-08-07	98.2	351.3	365.4	74		Fred Fredriskson MD	Natalie Serano, RDMS	2024-07-31	4260	M	Y
2024-07-20	3891320	107020	1991-09-14 07:37:01	Comp Detailed US	Revised	Present	2024-12-15	47.1	166.5	128.9	35.1	male	Fred Fredriskson MD	Natalie Serano, RDMS	2024-12-07	2925	M	Y
2024-07-20	3405410	1353621	1996-04-03 02:45:56	Follow up US	Revised	Present	2024-09-10	83.5	295.9	275.4	62.4		Fred Fredriskson MD	Angelica Zunj, RDMS	2024-09-01	2960	F	Y
2024-07-20	4034703	1370060	1995-12-10 04:25:46	Follow up US	Finalized	Present	2024-08-30	88.2	311.3	299.9	61.4		Fred Fredriskson MD	Natalie Serano, RDMS	2024-08-25	3160	F	Y
2024-07-20	3987100	1793189	1992-03-30 02:02:20	Follow up US	Revised	Present	2024-07-30	99.1	345	386.5	75.6	male	Robbie Robertson DO	Apoorva Kota, RDMS	2024-07-23	4000	M	Y
2024-07-21	3966656	109345	2002-05-11 13:21:33	Follow up US	Finalized	Present	2024-08-16	85.6	326.1	312.7	69.6	male	Jennifer Jenson MD	Tania Smith, RDMS	2024-07-31	2680	M	Y
2024-07-21	4049809	280379	1983-05-30 08:17:48	Follow up US	Finalized	Present	2024-10-10	70.7	269.4	231.8	57		Fred Fredriskson MD	Natalie Serano, RDMS	2024-10-05	3020	F	Y
2024-07-21	4000156	391971	1985-05-22 18:49:13	Follow up US	Finalized	Present	2024-08-01	99.3	349.9	323.2	78.3	female	Robbie Robertson DO	Veronica Macias, RDMS	2024-07-25	3100	F	Y
2024-07-21	3971749	589268	1988-01-04 04:01:52	Comp Detailed US	Finalized	Present	2024-09-15	88.3	313.4	290.8	63	female	Fred Fredriskson MD	Veronica Macias, RDMS	2024-09-16	3710	F	Y
2024-07-21	4085521	965738	1991-03-16 08:41:43	Follow up US	Finalized	Present	2024-09-03	86.3	316.5	294.4	59.9		Fred Fredriskson MD	Kaila Limanjaya, RDMS	2024-08-06	2630	M	Y
2024-07-21	3867662	1300397	1986-04-27 14:23:26	Follow up US	Finalized	Present	2024-09-10	91.1	321.6	325.2	67.2	male	Andrea Anderson MD	Vicky Martinez, RDMS	2024-08-22	3980	M	Y
2024-07-21	3967370	1534807	1989-07-19 17:58:35	Follow up US	Revised	Present	2024-07-28	94.7	336.8	336.6	74.7		Fred Fredriskson MD	Tania Smith, RDMS	2024-07-28	3360	M	Y
2024-07-21	3962754	1788579	1990-08-25 13:28:35	Comp Detailed US	Finalized	Present	2024-12-06	50.1	180.1	144.2	33.3	female	Robbie Robertson DO	Natalie Serano, RDMS	2024-11-28	3220	F	Y
2024-07-22	3832248	1439761	1988-02-21 03:25:18	Follow up US	Finalized	Present	2024-09-10	86.1	305.1	292.7	62.3		Andrea Anderson MD	Apoorva Kota, RDMS	2024-08-11	2700	M	Y
2024-07-23	4029311	548266	1983-12-09 05:58:35	Follow up US	Finalized	Present	2024-12-11	45	188.5	154.9	32.9	male	William Wilson MD	Angelica Zunj, RDMS	2024-12-01	3505	M	Y
2024-07-23	4087809	765584	1988-06-24 01:15:56	Follow up US	Finalized	Present	2024-08-27	82.3	302.1	336.9	66.4		Andrea Anderson MD	Kaila Limanjaya, RDMS	2024-08-07	2960	M	Y
2024-07-24	4088116	455976	1984-08-19 23:47:20	Follow up US	Finalized	Present	2024-08-20	92.1	328.1	288.3	64.8	male	William Wilson MD	Veronica Macias, RDMS	2024-08-11	2640	M	Y
2024-07-24	3530846	826000	1983-06-22 07:30:00	Comp Basic US	Finalized	Present	2024-09-22	82.8	307.1	289.9	64.7	male	Andrea Anderson MD	Vicky Martinez, RDMS	2024-09-08	3420	M	Y
2024-07-24	4012545	1140045	1989-12-04 16:39:50	Follow up US	Finalized	Present	2024-08-16	91.7	343.9	327.4	72.6		Andrea Anderson MD	Veronica Macias, RDMS	2024-08-10	3180	M	Y
2024-07-24	4010709	1427361	1995-05-29 09:00:00	Comp Detailed US	Finalized	Present	2024-12-13	49.8	173.5	146.6	30.5	female	Andrea Anderson MD	Angelica Zunj, RDMS	2024-11-30	2960	F	Y
2024-07-25	3992751	626508	1996-09-08 02:09:22	Comp Detailed US	Finalized	Present	2024-12-18	46.1	167.4	130	27.7	male	William Wilson MD	Natalie Serano, RDMS	2024-12-15	3350	M	Y
2024-07-25	4090919	758426	2001-02-21 22:03:16	Comp Detailed US	Finalized	Present	2024-12-07	54.1	192.2	172.9	35.7	male	Andrea Anderson MD	Veronica Macias, RDMS	2024-10-27	2385	M	Y
2024-07-25	4047113	881566	1982-09-21 12:37:58	Follow up US	Finalized	Present	2024-10-31	66.6	241.9	235.6	51.8	male	William Wilson MD	Apoorva Kota, RDMS	2024-10-29	3910	M	Y
2024-07-25	3965692	892424	1991-11-14 06:36:33	Comp Detailed US	Finalized	Present	2024-12-22	39.4	151.8	140.9	27.1	female	Fred Fredriskson MD	Apoorva Kota, RDMS	2024-12-13	3155	F	Y
2024-07-25	3948067	977532	1988-01-27 05:51:33	Comp Detailed US	Finalized	Present	2024-12-23	38.7	155	123.9	27.8	male	Andrea Anderson MD	Apoorva Kota, RDMS	2024-12-18	2950	M	Y
2024-07-25	3991887	1408704	1997-03-03 20:47:20	Follow up US	Finalized	Present	2024-08-22	85.6	332	311.7	74.4		Fred Fredriskson MD	Vicky Martinez, RDMS	2024-07-28	2810	M	Y
2024-07-25	3930408	1943001	1992-05-16 03:18:16	Comp Detailed US	Finalized	Present	2024-12-24	36.1	147.9	127.7	24.3	male	William Wilson MD	Angelica Zunj, RDMS	2024-12-08	3170	M	Y
2024-07-25	3552859	1981132	1990-10-27 11:33:16	Follow up US	Finalized	Present	2024-09-23	77.8	298.5	271.1	57.1		Fred Fredriskson MD	Angelica Zunj, RDMS	2024-09-22	3355	F	Y
2024-07-26	4104583	265402	1984-02-22 03:00:00	Comp Basic US	Finalized	Present	2024-09-02	88.2	331.3	320.7	65.7	male	Fred Fredriskson MD	Matthea Gregorio, RDMS	2024-08-12	2940	M	Y
2024-07-26	4018249	1557465	1987-04-13 09:50:37	Comp Detailed US	Finalized	Present	2024-12-14	47.3	172.3	152.9	35.7	female	Andrea Anderson MD	Natalie Serano, RDMS	2024-12-07	3790	F	Y
2024-07-26	4065855	1801243	1983-08-22 06:32:20	Follow up US	Finalized	Present	2024-10-02	81.3	293.9	274.6	59.6		William Wilson MD	Apoorva Kota, RDMS	2024-09-19	3490	M	Y
2024-07-27	3996669	381505	1989-06-11 19:15:56	Follow up US	Finalized	Present	2024-09-21	85.4	310.7	292.2	62.1		William Wilson MD	Tania Smith, RDMS	2024-09-06	3300	M	Y
2024-07-27	4023703	455479	1989-12-21 16:59:31	Follow up US	Finalized	Present	2024-10-07	78.6	269.2	226.6	54.9		Jennifer Jenson MD	Apoorva Kota, RDMS	2024-09-18	3175	F	Y
2024-07-27	3958780	1126643	1982-02-04 17:37:30	Comp Detailed US	Revised	Present	2024-12-23	46.4	162.6	139.1	26.6	male	William Wilson MD	Apoorva Kota, RDMS	2024-12-25	3460	M	Y
2024-07-28	4030074	1417740	1981-09-20 18:26:00	Follow up US	Finalized	Present	2024-10-31	66.7	244.7	222.4	51.3		Fred Fredriskson MD	Vicky Martinez, RDMS	2024-10-27	3555	M	Y
2024-07-28	4105090	1452536	1992-05-12 03:40:46	Follow up US	Revised	Present	2025-01-04	34.3	136.5	108.8	20.5	male	William Wilson MD	Deepa Yow, RDMS	2025-01-05	3090	M	Y
2024-07-28	4020947	1453700	1982-01-08 16:11:43	Follow up US	Finalized	Present	2024-09-21	79.8	301.7	271.9	58.4	female	Jennifer Jenson MD	Vicky Martinez, RDMS	2024-09-20	3160	F	Y
2024-07-28	4110855	1481323	1997-02-14 22:17:20	Follow up US	Finalized	Present	2024-11-23	55.6	210.7	176.1	38.9	male	William Wilson MD	Deepa Yow, RDMS	2024-11-23	3610	M	Y
2024-07-29	4061737	412674	1991-11-09 06:15:28	Comp Detailed US	Finalized	Present	2024-12-18	50.6	182.4	140.4	29.7	male	Fred Fredriskson MD	Angelica Zunj, RDMS	2024-12-11	3945	M	Y
2024-07-30	3873173	1197763	1988-08-21 01:55:18	Comp Detailed US	Finalized	Present	2024-12-24	43.7	161.4	133.2	28.5	female	Robbie Robertson DO	Vicky Martinez, RDMS	2024-11-11	1770	F	Y
2024-07-31	3880921	1443416	1989-07-13 20:36:05	Comp Detailed US	Finalized	Present	2024-12-26	39.5	160.8	146.7	32.5	female	Jennifer Jenson MD	Tania Smith, RDMS	2024-12-13	3180	F	Y
2024-08-01	4039386	290007	1985-01-21 21:43:35	Follow up US	Finalized	Present	2024-08-15	93.9	329.4	328.6	71.4	female	Robbie Robertson DO	Apoorva Kota, RDMS	2024-08-12	3480	F	Y
2024-08-01	4100040	528499	1995-12-04 04:59:31	Comp Detailed US	Revised	Present	2024-10-31	65	253.9	224.8	48.6	female	Jennifer Jenson MD	Veronica Macias, RDMS	2024-10-11	2350	F	Y
2024-08-01	3551131	1459451	1989-05-30 20:07:58	Follow up US	Finalized	Present	2024-09-28	75.9	288.1	278.2	66.1	male	William Wilson MD	Vicky Martinez, RDMS	2024-09-07	2780	M	Y
2024-08-01	3979912	1468521	1984-01-30 05:17:48	Follow up US	Finalized	Present	2024-11-20	57.3	218.5	185.8	44.4	male	Jennifer Jenson MD	Deepa Yow, RDMS	2024-11-14	3230	M	Y
2024-08-01	4093061	1593172	1988-05-08 01:39:50	Follow up US	Finalized	Present	2024-08-13	100.6	350.9	347	71	female	William Wilson MD	Apoorva Kota, RDMS	2024-08-15	3840	F	Y
2024-08-01	4019369	1739053	1981-01-15 21:36:33	Follow up US	Finalized	Present	2024-08-31	87.7	322.3	302.1	65.5		Jennifer Jenson MD	Veronica Macias, RDMS	2024-08-05	2460	F	Y
2024-08-01	4009479	1848795	1987-04-08 08:31:52	Follow up US	Finalized	Present	2024-08-31	90	331.5	321.8	71.8	male	Jennifer Jenson MD	Tania Smith, RDMS	2024-08-24	3360	M	Y
2024-08-02	3623209	664593	1988-09-19 23:43:07	Follow up US	Finalized	Present	2024-08-24	93.1	322.5	345.7	69.9	male	William Wilson MD	Apoorva Kota, RDMS	2024-08-18	3495	M	Y
2024-08-02	3951288	707329	1994-06-25 15:37:58	Comp Detailed US	Finalized	Present	2024-12-27	44.3	171.7	135.5	29.5	male	Robbie Robertson DO	Tania Smith, RDMS	2025-01-01	3745	M	Y
2024-08-02	4120513	711422	1989-12-16 18:35:09	Comp Detailed US	Finalized	Present	2024-12-21	43.7	169.9	148	32.3	male	William Wilson MD	Deepa Yow, RDMS	2024-12-18	3160	M	Y
2024-08-02	4062043	905067	1989-07-02 20:17:48	Comp Detailed US	Finalized	Present	2024-12-10	48.3	179.2	154.7	34.8	female	William Wilson MD	Vicky Martinez, RDMS	2024-11-19	2250	F	Y
2024-08-02	4127892	1404607	1990-01-15 17:44:31	Comp Detailed US	Finalized	Present	2024-12-29	43.4	162.5	142.5	29.7	male	William Wilson MD	Veronica Macias, RDMS	2024-12-19	3180	M	Y
2024-08-02	4126618	1845644	2006-07-27 13:24:22	Comp Detailed US	Finalized	Present	2024-10-05	74.1	278.9	257.6	57.6	male	Jennifer Jenson MD	Deepa Yow, RDMS	2024-09-20	2610	M	Y
2024-08-03	4139718	141815	1988-12-03 22:41:15	Follow up US	Finalized	Present	2024-08-30	93.4	326.6	330.5	68.3		William Wilson MD	Juana Manadeva, RDMS	2024-08-13	3740	M	Y
2024-08-03	4060364	151728	1982-05-11 13:48:59	Follow up US	Finalized	Present	2024-08-20	95.7	339.3	329.9	71.8	female	William Wilson MD	Tania Smith, RDMS	2024-08-17	3605	F	Y
2024-08-03	3980370	199222	1995-11-24 06:47:48	Comp Detailed US	Revised	Present	2024-12-26	41.6	160.1	141.4	28.6	female	Robbie Robertson DO	Veronica Macias, RDMS	2024-12-22	3810	F	Y
2024-08-03	4021455	317149	1999-03-18 10:22:58	Comp Detailed US	Finalized	Present	2024-12-19	45.8	177.6	152.7	34.7	female	Jennifer Jenson MD	Apoorva Kota, RDMS	2024-12-07	3860	F	Y
2024-08-03	4015956	984522	1999-08-18 06:16:52	Follow up US	Finalized	Present	2024-08-20	92	321.7	336.2	72.1		Jennifer Jenson MD	Veronica Macias, RDMS	2024-08-10	3050	M	Y
2024-08-03	4055114	1149788	1990-04-15 14:13:35	Follow up US	Finalized	Present	2024-08-23	90.6	326.2	337.5	70		William Wilson MD	Tania Smith, RDMS	2024-08-19	3465	M	Y
2024-08-03	4071611	1409367	1991-06-26 08:55:46	Comp Detailed US	Finalized	Present	2024-12-26	42	154.4	129	30.9	female	Robbie Robertson DO	Veronica Macias, RDMS	2024-12-26	3740	F	Y
2024-08-03	4137834	1561171	1987-05-27 08:00:56	Comp Basic US	Finalized	Present	2024-10-01	84.5	297	284	59.2	uncertain	Jennifer Jenson MD	Juana Manadeva, RDMS	2024-09-03	3170	F	Y
2024-08-03	3906924	1697624	1975-06-01 08:05:09	Follow up US	Finalized	Present	2024-09-26	82.2	308.2	277.8	63.2		Jennifer Jenson MD	Vicky Martinez, RDMS	2024-09-08	2980	F	Y	3050
2024-08-03	4105550	1917852	1989-04-21 20:41:43	Follow up US	Revised	Present	2024-09-06	84.7	323.5	300.4	63.3		Jennifer Jenson MD	Deepa Yow, RDMS	2024-08-29	2920	M	Y
2024-08-04	4094540	265402	1984-02-15 03:00:00	Follow up US	Revised	Present	2024-09-02	89.6	337.2	328.3	69.3	male	Robbie Robertson DO	Deepa Yow, RDMS	2024-08-12	2940	M	Y
2024-08-04	4060415	335604	1992-09-21 00:21:05	Follow up US	Finalized	Present	2024-09-27	83.6	291.1	284	62.1		Jennifer Jenson MD	Veronica Macias, RDMS	2024-09-17	3320	F	Y
2024-08-04	4138649	917461	1993-05-30 21:29:31	Follow up US	Finalized	Present	2024-12-10	52.2	187.1	165.5	37.1	male	Robbie Robertson DO	Deepa Yow, RDMS	2024-12-13	3630	M	Y
2024-08-04	4132020	1114848	1998-05-30 14:10:46	Comp Detailed US	Revised	Present	2024-09-28	80.1	303.3	298.8	64.8	male	Jennifer Jenson MD	Deepa Yow, RDMS	2024-09-26	4460	M	Y
2024-08-04	4078855	1747882	1999-11-21 06:09:50	Comp Detailed US	Finalized	Present	2024-12-17	48.6	180	150.5	30.6	male	William Wilson MD	Apoorva Kota, RDMS	2024-12-07	3375	M	Y
2024-08-05	4081657	1157802	1983-02-23 10:18:45	Comp Detailed US	Finalized	Present	2024-12-08	58.1	203.2	181.2	37	female	Jennifer Jenson MD	Vicky Martinez, RDMS	2024-11-27	3735	F	Y
2024-08-06	4088832	53949	1993-07-09 19:28:35	Comp Basic US	Finalized	Present	2024-10-02	90.2	315	282.6	64.4		Fred Fredriskson MD	Apoorva Kota, RDMS	2024-09-21	2880	M	Y
2024-08-06	4140784	346690	1995-09-04 08:05:09	Fetal Echo	Finalized	Present	2024-12-10	55.4	200.8	163.9	39.4	female	Jennifer Jenson MD	Angelica Zunj, RDMS	2024-12-07	3420	F	Y
2024-08-07	4065957	322422	1986-01-23 16:03:16	Follow up US	Finalized	Present	2024-09-28	80.5	315	290.6	61.6	female	Jennifer Jenson MD	Tania Smith, RDMS	2024-09-20	2880	F	Y
2024-08-07	4147152	356346	1990-03-29 14:06:33	Follow up US	Finalized	Present	2024-08-20	95.2	334.7	349.1	74.9	female	Robbie Robertson DO	Deepa Yow, RDMS	2024-08-17	3140	F	Y
2024-08-07	3802437	564537	1992-10-19 00:28:07	Follow up US	Finalized	Present	2024-10-31	73.6	264.2	234.4	54.1		Andrea Anderson MD	Angelica Zunj, RDMS	2024-10-26	3420	M	Y
2024-08-07	4094947	1035804	1997-03-10 21:02:48	Comp Detailed US	Finalized	Present	2024-10-18	79.7	295.3	261.8	58.9	female	Jennifer Jenson MD	Veronica Macias, RDMS	2024-10-02	2950	F	Y
2024-08-07	4082062	1905678	1991-03-05 10:20:09	Comp Detailed US	Finalized	Present	2024-12-15	51	197.6	168.6	35.3	female	Fred Fredriskson MD	Angelica Zunj, RDMS	2024-12-11	3800	F	Y
2024-08-08	4092653	976175	1988-09-26 00:28:07	Fetal Echo	Finalized	Present	2024-11-23	64.2	219.7	209.1	45	male	Robbie Robertson DO	Vicky Martinez, RDMS	2024-11-15	3040	M	Y
2024-08-08	4153780	1138703	1991-12-16 04:30:00	Comp Basic US	Revised	Present	2024-11-28	49	193	159.2	35		Andrea Anderson MD	Laura Gavva, RDMS	2024-08-14	415	F	Y
2024-08-08	4156268	1540192	1989-10-04 17:44:31	Follow up US	Finalized	Present	2024-10-09	80.1	295.6	268.4	59.1	male	Jennifer Jenson MD	Matthea Gregorio, RDMS	2024-10-06	3780	M	Y
2024-08-09	3996209	132579	1988-05-16 04:04:41	Comp Detailed US	Finalized	Present	2024-12-30	42.8	167.6	145	30	female	Fred Fredriskson MD	Tania Smith, RDMS	2024-12-17	3150	F	Y
2024-08-09	4003874	354348	1995-08-01 08:23:26	Comp Detailed US	Finalized	Present	2025-01-02	46.6	162.2	144.6	31	male	Robbie Robertson DO	Apoorva Kota, RDMS	2024-12-26	3570	M	Y
2024-08-09	4164768	426024	1985-05-20 20:52:58	Follow up US	Finalized	Present	2024-10-28	73.9	278	250	53.6		Fred Fredriskson MD	Tania Smith, RDMS	2024-10-11	2720	F	Y
2024-08-09	4078599	606429	1986-12-12 09:50:37	Follow up US	Finalized	Present	2024-09-05	88.1	308.3	271.5	62		Fred Fredriskson MD	Apoorva Kota, RDMS	2024-08-15	2120	F	Y
2024-08-09	4055063	811452	1989-10-19 17:13:35	Follow up US	Finalized	Present	2024-10-07	77.8	289.8	290.3	57.6		Fred Fredriskson MD	Veronica Macias, RDMS	2024-09-19	3185	F	Y
2024-08-09	4084605	920016	1988-10-13 00:21:05	Follow up US	Finalized	Present	2024-09-21	80.4	283.1	288.5	66.2	female	Jennifer Jenson MD	Veronica Macias, RDMS	2024-09-26	3510	F	Y
2024-08-09	4136763	1113223	1987-12-24 04:15:56	Follow up US	Finalized	Present	2024-10-06	83.6	307.5	276.1	56.7		Fred Fredriskson MD	Tania Smith, RDMS	2024-09-29	3610	M	Y
2024-08-09	3852733	1406354	1988-10-20 00:14:03	Follow up US	Finalized	Present	2024-10-19	79.8	297.2	261.3	58.9	male	Robbie Robertson DO	Tania Smith, RDMS	2024-10-10	3220	M	Y
2024-08-09	3478815	1515457	1986-03-19 15:11:15	Follow up US	Finalized	Present	2024-09-08	87.2	329.9	350.7	62.2		Fred Fredriskson MD	Estefania Traun, RDMS	2024-08-31	3115	M	Y
2024-08-10	4052516	128362	1990-12-01 12:33:45	Comp Detailed US	Finalized	Present	2025-01-03	45.1	166.2	146.8	27.4	female	Robbie Robertson DO	Veronica Macias, RDMS	2024-11-27	2280	F	Y
2024-08-10	4057252	338827	1993-10-02 18:40:46	Follow up US	Finalized	Present	2024-11-03	69.5	262.9	227.6	54.2	male	Jennifer Jenson MD	Vicky Martinez, RDMS	2024-11-08	3120	M	Y
2024-08-10	4053638	470543	1999-04-17 09:21:05	Follow up US	Finalized	Present	2024-11-17	66.8	240.3	217.2	49.7	male	Robbie Robertson DO	Tania Smith, RDMS	2024-11-07	3290	M	Y
2024-08-10	4076817	604209	1982-09-04 12:37:58	Follow up US	Finalized	Present	2024-10-20	72.7	269.2	243.7	48.4	male	Jennifer Jenson MD	Deepa Yow, RDMS	2024-09-18	1665	M	Y
2024-08-10	4053945	646904	1995-05-22 07:38:26	Follow up US	Finalized	Present	2024-10-02	87.2	293.2	272.5	63.5	male	Robbie Robertson DO	Veronica Macias, RDMS	2024-09-14	2460	M	Y
2024-08-10	4096682	847781	1988-10-03 23:57:11	Comp Detailed US	Finalized	Present	2024-09-20	81.5	303.7	322.2	63.3	female	Fred Fredriskson MD	Tania Smith, RDMS	2024-09-01	3485	F	Y
2024-08-10	4058834	850365	1987-02-11 10:45:28	Comp Detailed US	Finalized	Present	2024-12-29	47	181.8	152.6	31.1	male	Jennifer Jenson MD	Veronica Macias, RDMS	2024-12-17	3480	M	Y
2024-08-10	4094132	947677	1993-01-28 21:56:15	Comp Detailed US	Finalized	Present	2024-10-18	79.6	301.1	269.4	56.9	male	Jennifer Jenson MD	Veronica Macias, RDMS	2024-10-10	3710	M	Y
2024-08-10	4158467	1001106	1996-07-19 02:55:46	Comp Detailed US	Finalized	Present	2025-01-02	42.5	163.4	146.3	31.3		Robbie Robertson DO	Vicky Martinez, RDMS	2024-12-26	3460	M	Y
2024-08-10	4084094	1300397	1986-04-05 14:23:26	Follow up US	Finalized	Present	2024-09-09	91.3	322.6	359.8	75.7		Fred Fredriskson MD	Veronica Macias, RDMS	2024-08-22	3980	M	Y
2024-08-10	3965591	1941391	1990-01-07 17:10:46	Follow up US	Finalized	Present	2024-11-01	73.4	261.5	245.1	52.8	female	Robbie Robertson DO	Vicky Martinez, RDMS	2024-10-15	2920	F	Y
2024-08-11	3942832	44720	1987-08-30 06:25:18	Follow up US	Finalized	Present	2024-11-03	70.1	258.6	246.9	55		Fred Fredriskson MD	Apoorva Kota, RDMS	2024-10-13	3560	F	Y
2024-08-11	4060823	725201	1980-10-18 00:20:23	Follow up US	Finalized	Present	2024-10-14	78.8	295.3	275.3	60.1		Fred Fredriskson MD	Vicky Martinez, RDMS	2024-10-01	3400	M	Y
2024-08-11	4098259	1272235	1990-06-06 15:11:15	Comp Detailed US	Finalized	Present	2024-12-31	41.8	170.7	137.4	32.2	female	Jennifer Jenson MD	Veronica Macias, RDMS	2024-12-25	2750	F	Y
2024-08-11	4115352	1370060	1995-11-23 04:25:46	Follow up US	Finalized	Present	2024-08-28	91.5	338.1	325.5	66.1		Fred Fredriskson MD	Estefania Traun, RDMS	2024-08-25	3160	F	Y
2024-08-11	4058325	1419073	1990-07-16 13:52:30	F/U Fetal Echo	Finalized	Present	2024-11-16	63.4	229.7	211.2	49.3	male	Robbie Robertson DO	Estefania Traun, RDMS	2024-11-15	3350	M	Y
2024-08-11	4058629	1515632	1992-09-13 01:45:28	Comp Detailed US	Finalized	Present	2025-01-02	45.6	175.3	144.5	28.3	female	Robbie Robertson DO	Estefania Traun, RDMS	2025-01-02	3880	F	Y
2024-08-11	4053996	1588871	1984-08-10 00:40:46	Follow up US	Finalized	Present	2024-09-29	87	330.1	300	64.3		Jennifer Jenson MD	Tania Smith, RDMS	2024-09-20	3910	M	Y
2024-08-12	4005048	201446	1995-08-09 07:06:05	Follow up US	Finalized	Present	2024-11-01	66.6	255.9	230.9	51.3	female	Robbie Robertson DO	Apoorva Kota, RDMS	2024-10-30	3350	F	Y
2024-08-12	3620292	1165578	1988-04-09 02:57:11	Comp Basic US	Finalized	Present	2024-10-06	83.9	318.1	286.6	66.4	male	Jennifer Jenson MD	Apoorva Kota, RDMS	2024-09-06	3250	M	Y
2024-08-13	4169554	335604	1992-09-30 00:21:05	Comp Basic US	Finalized	Present	2024-09-26	86.6	311.2	307.1	67.4	female	Jennifer Jenson MD	Vicky Martinez, RDMS	2024-09-15	3320	F	Y
2024-08-13	4165581	459230	1995-05-23 08:54:22	Comp Basic US	Finalized	Present	2024-10-16	73.1	274.5	269.4	60.9	female	Fred Fredriskson MD	Vicky Martinez, RDMS	2024-10-10	3640	F	Y
2024-08-13	4091430	1454167	1993-10-15 19:37:01	Comp Detailed US	Revised	Present	2025-01-02	48.5	176.6	140.1	33.3	male	Fred Fredriskson MD	Estefania Traun, RDMS	2024-12-20	3205	M	Y
2024-08-14	4115301	112395	1992-10-10 00:26:43	Comp Basic US	Finalized	Present	2024-10-26	76.9	282.8	258.1	53.7	female	Andrea Anderson MD	Vicky Martinez, RDMS	2024-10-12	3270	F	Y
2024-08-14	4014936	1529481	1998-07-16 14:20:37	Comp Detailed US	Finalized	Present	2025-01-08	45.3	173.5	154.5	28	male	Jennifer Jenson MD	Veronica Macias, RDMS	2024-12-22	3120	M	Y
2024-08-14	4083431	1646263	1992-09-10 02:02:20	Comp Detailed US	Finalized	Present	2025-01-09	43.6	165.6	150	27.6	female	William Wilson MD	Veronica Macias, RDMS	2025-01-06	2945	F	Y
2024-08-14	3438747	1927620	1989-05-15 19:46:52	Follow up US	Finalized	Present	2024-08-30	88.8	327.6	337.5	74.1	male	Andrea Anderson MD	Apoorva Kota, RDMS	2024-08-28	3530	M	Y
2024-08-15	4067129	280379	1983-06-23 08:17:48	Follow up US	Finalized	Present	2024-10-09	79.9	296	264.9	59.9		Andrea Anderson MD	Estefania Traun, RDMS	2024-10-05	3020	F	Y
2024-08-15	4077936	589268	1987-12-25 04:01:52	Follow up US	Finalized	Present	2024-09-14	92	319	321.3	70.4	female	William Wilson MD	Veronica Macias, RDMS	2024-09-16	3710	F	Y
2024-08-15	3802233	1331969	1991-11-22 04:42:39	Follow up US	Finalized	Present	2024-09-05	84.2	313.6	325.7	72.7		Fred Fredriskson MD	Apoorva Kota, RDMS	2024-08-30	3140	M	Y
2024-08-15	4095049	1633712	1996-08-06 02:48:45	Comp Detailed US	Finalized	Present	2025-01-07	43.7	166.4	145.4	34.7	female	Jennifer Jenson MD	Veronica Macias, RDMS	2024-12-27	3740	F	Y
2024-08-15	4074821	1668898	1988-10-22 01:11:43	Comp Detailed US	Finalized	Present	2025-01-12	39.3	154.8	129.4	32.4	female	William Wilson MD	Veronica Macias, RDMS	2025-01-04	3310	F	Y
2024-08-15	4131460	1941471	1992-11-11 22:46:52	Follow up US	Revised	Present	2024-09-12	90.7	324.6	316.9	68.7	female	Andrea Anderson MD	Veronica Macias, RDMS	2024-09-07	2440	F	Y
2024-08-15	4133089	1943463	1985-12-19 17:17:48	Comp Basic US	Finalized	Present	2024-10-14	85.4	303	318.5	60.8	female	Jennifer Jenson MD	Apoorva Kota, RDMS	2024-10-09	3750	F	Y
2024-08-15	3946387	1945587	1994-09-15 14:07:58	Comp Detailed US	Finalized	Present	2025-01-10	43.6	160.6	138.3	27.2	female	Fred Fredriskson MD	Vicky Martinez, RDMS	2025-01-08	3430	F	Y
2024-08-16	4075286	352253	1999-01-26 19:42:39	Follow up US	Finalized	Present	2024-10-14	85.1	305.5	275.6	59.6		William Wilson MD	Tania Smith, RDMS	2026-04-25	3755	F	Y
2024-08-16	4142616	646621	1977-10-28 17:55:04	Comp Detailed US	Finalized	Present	2024-10-10	79.8	303.4	279.1	60.1	female	William Wilson MD	Veronica Macias, RDMS	2024-10-08	3205	F	Y
2024-08-16	4050981	768638	1992-02-21 05:27:39	Comp Detailed US	Finalized	Present	2025-01-08	42.8	155.6	130.1	25	male	Andrea Anderson MD	Vicky Martinez, RDMS	2025-01-01	3290	M	Y
2024-08-16	4023294	1578045	1984-10-31 01:48:16	Comp Detailed US	Finalized	Present	2025-01-13	45.5	166.6	135.1	27.4	female	Jennifer Jenson MD	Apoorva Kota, RDMS	2025-01-14	3420	F	Y
2024-08-17	4103400	290873	1996-10-22 23:34:41	Follow up US	Revised	Present	2024-10-12	80.8	288	283.4	65.3		William Wilson MD	Estefania Traun, RDMS	2024-10-02	3250	M	Y
2024-08-17	4083789	427093	1990-01-21 17:06:33	Follow up US	Finalized	Present	2024-11-15	67.4	244.8	232.3	47.4		Jennifer Jenson MD	Estefania Traun, RDMS	2024-11-13	2980	F	Y
2024-08-17	4200746	1216648	1996-03-10 03:14:03	Follow up US	Finalized	Present	2024-09-21	91.3	322.8	293.2	68.4		William Wilson MD	Matthea Gregorio, RDMS	2024-08-26	2560	F	Y
2024-08-17	4181218	1474441	1992-01-03 06:05:37	Comp Detailed US	Finalized	Present	2025-01-09	38.6	151.8	129.8	27.4	female	Jennifer Jenson MD	Angelica Zunj, RDMS	2024-12-16	2445	F	Y
2024-08-17	4168133	1944225	1990-11-26 12:43:35	Comp Detailed US	Finalized	Present	2025-01-17	38.5	145.8	124.3	26.2	female	Fred Fredriskson MD	Tania Smith, RDMS	2025-01-08	2450	F	Y
2024-08-18	4107951	455479	1989-11-21 16:59:31	Follow up US	Finalized	Present	2024-10-08	80.5	297.7	264.9	58.2		William Wilson MD	Veronica Macias, RDMS	2024-09-17	3175	F	Y
2024-08-18	4164312	931079	1992-06-12 02:37:30	Follow up US	Finalized	Present	2024-12-05	59.1	214.5	197.5	43.2		Fred Fredriskson MD	Vicky Martinez, RDMS	2024-11-27	3560	M	Y
2024-08-18	4025231	1261618	1999-08-27 08:31:52	Comp Detailed US	Finalized	Present	2025-01-11	39.7	160.2	131.9	32.2	female	William Wilson MD	Veronica Macias, RDMS	2025-01-10	3240	F	Y
2024-08-19	4142105	107020	1991-09-19 07:37:01	Follow up US	Finalized	Present	2024-12-15	55.6	204.3	181.2	37.5		Fred Fredriskson MD	Vicky Martinez, RDMS	2024-12-07	2925	M	Y
2024-08-19	4142156	1075108	1989-03-06 22:14:31	Follow up US	Finalized	Present	2024-11-11	73.7	280.2	236.2	52.7	male	William Wilson MD	Apoorva Kota, RDMS	2024-11-01	3475	M	Y
2024-08-20	4056639	889700	1999-08-22 08:24:50	Comp Detailed US	Finalized	Present	2025-01-13	42.6	161.6	132.7	27.7	male	Robbie Robertson DO	Estefania Traun, RDMS	2025-01-01	3660	M	Y
2024-08-21	4187797	201428	1989-07-12 21:22:30	Comp Detailed US	Finalized	Present	2025-01-08	46.7	174.7	161.8	30.8	male	Andrea Anderson MD	Apoorva Kota, RDMS	2024-12-30	3330	M	Y
2024-08-21	3954190	354774	1992-05-25 03:28:07	Comp Detailed US	Revised	Present	2025-01-15	41.6	154.2	139.8	27	female	Robbie Robertson DO	Apoorva Kota, RDMS	2025-01-09	3440	F	Y
2024-08-21	4096630	881566	1982-10-14 12:37:58	Follow up US	Revised	Present	2024-11-02	78.8	289.5	273	58.8	male	Andrea Anderson MD	Vicky Martinez, RDMS	2024-10-27	3910	M	Y
2024-08-21	4119337	1468521	1984-01-21 05:17:48	Follow up US	Finalized	Present	2024-11-18	66.7	251.5	220.5	52.8	male	Andrea Anderson MD	Estefania Traun, RDMS	2024-11-13	3230	M	Y
2024-08-22	4053281	476047	1991-07-24 09:05:37	Comp Detailed US	Finalized	Present	2025-01-14	47.8	168.6	148.8	32.5	male	William Wilson MD	Angelica Zunj, RDMS	2025-01-10	3070	M	Y
2024-08-22	4204513	666768	1988-03-10 03:37:58	Follow up US	Finalized	Present	2024-10-13	77.9	291.3	279	63.4	female	William Wilson MD	Tania Smith, RDMS	2024-10-13	3120	F	Y
2024-08-22	4073189	811181	1989-04-16 23:02:20	Comp Detailed US	Finalized	Present	2025-01-16	45	165.7	139.3	30.3	female	Robbie Robertson DO	Tania Smith, RDMS	2025-01-10	3025	F	Y
2024-08-22	4185094	1604342	1988-02-16 03:18:16	Comp Detailed US	Finalized	Present	2024-10-23	79.1	290.8	263.9	63.9	male	Andrea Anderson MD	Deepa Yow, RDMS	2024-09-24	2490	M	Y
2024-08-22	4036333	1709935	1989-07-02 21:02:48	Comp Detailed US	Finalized	Present	2025-01-16	46.8	162.2	135	27.4	female	William Wilson MD	Vicky Martinez, RDMS	2025-01-13	3500	F	Y
2024-08-22	4205989	1845644	2006-07-19 13:24:22	Follow up US	Finalized	Present	2024-10-06	81.6	287.4	283.1	66.6	male	William Wilson MD	Deepa Yow, RDMS	2024-09-21	2610	M	Y
2024-08-23	4174036	576265	2002-06-20 20:29:03	Follow up US	Finalized	Present	2024-12-02	65.8	232.7	210.3	47.9	female	Andrea Anderson MD	Angelica Zunj, RDMS	2025-11-29	2490	M	Y
2024-08-23	3834642	778034	1997-08-08 19:10:18	Follow up US	Finalized	Present	2024-10-15	78.6	297.5	276.5	64.6		Fred Fredriskson MD	Veronica Macias, RDMS	2024-10-17	3240	F	Y
2024-08-23	4208285	826000	1983-07-17 07:30:00	Follow up US	Finalized	Present	2024-09-20	90.2	328	339.7	69.2	male	Robbie Robertson DO	Vicky Martinez, RDMS	2024-09-08	3420	M	Y
2024-08-23	4050930	1408707	1986-03-12 16:32:48	Follow up US	Revised	Present	2024-11-15	78.3	274.2	255.2	55.8	male	William Wilson MD	Natalie Serano, RDMS	2024-11-12	3290	M	Y
2024-08-23	4214281	1561171	1987-05-09 08:00:56	Follow up US	Finalized	Present	2024-10-01	87.4	310.9	314	57.7	uncertain	Andrea Anderson MD	Leticia Castro, RDMS	2024-09-04	3170	F	Y
2024-08-23	4026304	1692880	1994-01-02 18:29:31	Comp Detailed US	Finalized	Present	2025-01-25	40.6	150.3	122.1	25	female	Robbie Robertson DO	Apoorva Kota, RDMS	2025-01-03	1850	F	Y
2024-08-23	4189787	1776674	1988-02-19 03:52:01	Comp Detailed US	Finalized	Present	2024-10-02	84.4	299.6	310.2	65.6	male	Fred Fredriskson MD	Veronica Macias, RDMS	2024-09-29	3250	M	Y
2024-08-23	3431902	1917852	1989-04-18 20:41:43	Follow up US	Finalized	Present	2024-09-08	92.1	333.6	336.6	71.4		Robbie Robertson DO	Vicky Martinez, RDMS	2024-08-30	2920	M	Y
2024-08-24	4000974	309700	1991-05-29 08:22:01	Comp Detailed US	Finalized	Present	2025-01-12	49.2	176.3	148.7	34.6	male	William Wilson MD	Natalie Serano, RDMS	2024-10-16	1080	M	Y
2024-08-24	4051288	1207340	1992-06-14 03:07:01	Comp Detailed US	Finalized	Present	2025-01-10	43.7	166.7	165.3	35.3	female	Fred Fredriskson MD	Estefania Traun, RDMS	2024-12-18	3965	F	Y
2024-08-24	4077020	1401574	1987-12-06 05:38:54	Follow up US	Revised	Present	2024-10-13	82	307.4	283.3	61.4	female	Robbie Robertson DO	Angelica Zunj, RDMS	2024-10-09	3370	F	Y
2024-08-24	3986131	1801243	1983-09-17 06:32:20	Follow up US	Finalized	Present	2024-10-04	86.3	310.4	318.2	66.6		Fred Fredriskson MD	Apoorva Kota, RDMS	2024-09-19	3490	M	Y
2024-08-25	4137429	381505	1989-07-24 19:15:56	Follow up US	Finalized	Present	2024-09-22	89.1	336.8	331.6	75.2		Robbie Robertson DO	Estefania Traun, RDMS	2024-09-08	3300	M	Y
2024-08-25	4168845	1453700	1982-01-25 16:11:43	Follow up US	Finalized	Present	2024-09-22	90.5	325.5	307.6	67.6	female	William Wilson MD	Apoorva Kota, RDMS	2024-09-21	3160	F	Y
2024-08-25	4053894	1796872	1993-12-02 18:19:41	Comp Detailed US	Finalized	Present	2025-01-17	48.5	177	144	35.1	female	Fred Fredriskson MD	Vicky Martinez, RDMS	2025-01-02	3150	F	Y
2024-08-26	4056844	375026	1991-04-08 10:34:13	Comp Detailed US	Finalized	Present	2025-01-19	42.9	162.1	148.1	28.4	female	Fred Fredriskson MD	Estefania Traun, RDMS	2025-01-13	3430	F	Y
2024-08-26	4223934	569815	1987-06-15 07:51:05	Follow up US	Finalized	Present	2024-10-21	83	296.3	273.3	62		William Wilson MD	Leticia Castro, RDMS	2024-09-02	2160	M	Y
2024-08-26	4228871	669682	1991-12-15 04:56:43	Follow up US	Finalized	Present	2024-10-12	82.9	300.8	280.8	60.9		Fred Fredriskson MD	Juana Manadeva, RDMS	2024-10-05	2950	F	Y
2024-08-26	3998525	1270383	1992-05-13 03:59:03	Comp Detailed US	Finalized	Present	2025-01-18	46	161.7	144.5	28.9	male	William Wilson MD	Natalie Serano, RDMS	2025-01-18	3690	M	Y
2024-08-26	4115662	1417740	1981-10-13 18:26:00	Follow up US	Finalized	Present	2024-10-31	77.9	291.9	271	59		Robbie Robertson DO	Estefania Traun, RDMS	2024-10-28	3555	M	Y
2024-08-26	4145775	1499606	1984-07-02 01:59:31	Follow up US	Finalized	Present	2024-10-22	76.8	276.6	278.3	60.7		Fred Fredriskson MD	Veronica Macias, RDMS	2024-10-21	3250	M	Y
2024-08-27	4144758	960317	1991-10-16 06:19:41	Comp Basic US	Finalized	Present	2024-11-19	61.4	233.2	225.1	48.2	female	Jennifer Jenson MD	Angelica Zunj, RDMS	2024-10-25	2285	F	Y	2265
2024-08-28	4174239	214990	1994-08-09 14:47:20	Comp Detailed US	Finalized	Present	2025-01-25	44.7	166	137.9	29.8	male	Jennifer Jenson MD	Apoorva Kota, RDMS	2025-01-26	3020	M	Y
2024-08-28	4067078	490341	1989-01-14 00:09:50	Comp Detailed US	Finalized	Present	2025-01-21	42.5	155.4	136.8	27.6	female	Fred Fredriskson MD	Angelica Zunj, RDMS	2025-01-06	2530	F	Y	2560
2024-08-28	4124337	528499	1995-12-30 04:59:31	Comp Basic US	Finalized	Present	2024-10-30	75.7	296.7	250.6	61.5	female	Robbie Robertson DO	Tania Smith, RDMS	2024-10-11	2350	F	Y
2024-08-28	3743232	899763	1989-07-19 19:20:09	Follow up US	Finalized	Present	2024-10-23	80.7	307.9	279.4	62.7	female	Jennifer Jenson MD	Apoorva Kota, RDMS	2024-10-22	3670	F	Y
2024-08-28	4156673	947677	1993-02-03 21:56:15	Follow up US	Finalized	Present	2024-10-18	83.8	303	292.6	62.7	male	Jennifer Jenson MD	Angelica Zunj, RDMS	2024-10-11	3710	M	Y
2024-08-28	4152606	1035804	1997-04-28 21:02:48	Follow up US	Finalized	Present	2024-10-17	85.8	314.9	283.2	60.3	female	Jennifer Jenson MD	Natalie Serano, RDMS	2024-10-02	2950	F	Y
2024-08-29	4131562	398544	1992-03-07 04:28:35	Follow up US	Finalized	Present	2024-11-19	74.8	267.7	254.1	52.2		Fred Fredriskson MD	Natalie Serano, RDMS	2024-11-18	3775	F	Y
2024-08-29	4160753	847781	1988-09-17 23:57:11	Follow up US	Finalized	Present	2024-09-19	86.6	317.1	364.6	76.4	female	Jennifer Jenson MD	Estefania Traun, RDMS	2024-09-01	3485	F	Y
2024-08-29	3523597	1306868	1986-04-06 14:57:11	Follow up US	Finalized	Present	2024-10-02	92.2	323.8	322.1	71.7	male	Robbie Robertson DO	Vicky Martinez, RDMS	2024-09-26	3930	M	Y
2024-08-29	4198050	1515632	1992-10-23 01:45:28	Follow up US	Revised	Present	2025-01-02	55.1	205.9	181.1	36.4		Jennifer Jenson MD	Vicky Martinez, RDMS	2025-01-01	3880	F	Y
2024-08-29	3907077	1697624	1975-05-15 08:05:09	Follow up US	Finalized	Present	2024-09-26	89.8	323.1	304.8	69.3		Fred Fredriskson MD	Vicky Martinez, RDMS	2024-09-09	2980	F	Y
2024-08-29	3986080	1801243	1983-08-12 06:32:20	Comp Basic US	Revised	Present	2024-10-02	91.2	313.3	326.4	64.4		Jennifer Jenson MD	Apoorva Kota, RDMS	2024-09-19	3490	M	Y
2024-08-30	4226537	110339	2005-10-30 18:19:41	Comp Detailed US	Finalized	Present	2025-01-13	50.6	186.2	142.7	30.8	male	Robbie Robertson DO	Veronica Macias, RDMS	2024-12-01	2580	M	Y
2024-08-30	4101670	990199	1993-04-02 21:47:48	Follow up US	Revised	Present	2024-12-01	70	241.9	220	47.9		Fred Fredriskson MD	Vicky Martinez, RDMS	2024-11-13	2640	F	Y
2024-08-31	4027476	94098	2003-03-16 09:29:31	F/U Fetal Echo	Finalized	Present	2024-11-14	73.3	282.1	239.2	55.8	male	Jennifer Jenson MD	Vicky Martinez, RDMS	2024-10-27	3200	M	Y
2024-08-31	4074311	629296	1986-06-10 15:45:00	Comp Detailed US	Finalized	Present	2025-01-20	47.6	177.6	156.7	29.8	male	Jennifer Jenson MD	Veronica Macias, RDMS	2025-01-14	3560	M	Y
2024-08-31	4250459	795335	1994-09-30 12:01:24	Follow up US	Finalized	Present	2024-10-17	90.8	325	298	62.6		Fred Fredriskson MD	Kaila Limanjaya, RDMS	2024-10-06	3170	M	Y
2024-08-31	4253922	994714	1990-09-24 13:21:33	Follow up US	Finalized	Present	2024-11-27	67.8	256.3	222.2	49	female	Robbie Robertson DO	Deepa Yow, RDMS	2024-11-08	2235	F	Y
2024-08-31	4242416	1197335	1992-03-22 04:39:50	Comp Detailed US	Finalized	Present	2025-01-25	41.6	154.3	127.6	30.2	female	Fred Fredriskson MD	Natalie Serano, RDMS	2025-01-19	3360	F	Y
2024-08-31	3551182	1459451	1989-06-08 20:07:58	Follow up US	Finalized	Present	2024-09-28	84.2	306	307.7	70.4	male	Robbie Robertson DO	Vicky Martinez, RDMS	2024-09-06	2780	M	Y
2024-08-31	4182391	1540133	1996-06-03 04:06:05	Comp Detailed US	Finalized	Present	2025-01-25	43.7	160.9	128.5	32.4	female	Fred Fredriskson MD	Estefania Traun, RDMS	2025-01-24	3110	F	Y
2024-09-01	4167265	338827	1993-10-07 18:40:46	Follow up US	Finalized	Present	2024-11-03	73.8	294.1	256	60.5		Fred Fredriskson MD	Natalie Serano, RDMS	2024-11-07	3120	M	Y
2024-09-01	4239718	455479	1989-10-31 16:59:31	Follow up US	Finalized	Present	2024-10-08	84.3	312.4	291.5	65.9		Jennifer Jenson MD	Apoorva Kota, RDMS	2024-09-19	3175	F	Y
2024-09-01	4136559	604209	1982-09-07 12:37:58	Follow up US	Finalized	Present	2024-10-20	77	286.7	248.7	56.2		Fred Fredriskson MD	Estefania Traun, RDMS	2024-09-18	1665	M	Y
2024-09-01	4252340	811452	1989-12-04 17:13:35	Follow up US	Revised	Present	2024-10-05	88.3	311.9	315.4	66.3		Jennifer Jenson MD	Tania Smith, RDMS	2024-09-17	3185	F	Y
2024-09-01	4183666	976175	1988-10-16 00:28:07	Follow up US	Finalized	Present	2024-11-21	69.9	271.6	240.7	50.4	male	Jennifer Jenson MD	Vicky Martinez, RDMS	2024-11-16	3040	M	Y
2024-09-01	4257685	1165578	1988-02-22 02:57:11	Follow up US	Finalized	Present	2024-10-05	88.5	334.4	312.2	71.2		Jennifer Jenson MD	Vicky Martinez, RDMS	2024-09-05	3250	M	Y
2024-09-01	4056485	1291585	1983-09-13 08:15:00	Comp Detailed US	Finalized	Present	2025-01-22	41.2	161.9	149.9	30.4	male	Fred Fredriskson MD	Veronica Macias, RDMS	2024-12-26	2170	M	Y
2024-09-01	3915757	1590420	1990-04-21 14:50:09	Follow up US	Finalized	Present	2024-10-28	79.9	296	301.4	60.4		Fred Fredriskson MD	Natalie Serano, RDMS	2024-10-20	3690	M	Y
2024-09-02	4072475	300419	1988-05-19 02:45:56	Follow up US	Finalized	Present	2024-11-09	77.5	280.9	273.8	64.6		Fred Fredriskson MD	Veronica Macias, RDMS	2024-11-07	3720	M	Y
2024-09-02	4170470	1357885	1992-12-29 00:23:54	Comp Detailed US	Revised	Present	2025-01-25	45	169.6	136.7	33.2	male	Fred Fredriskson MD	Estefania Traun, RDMS	2025-01-16	3020	M	Y
2024-09-04	4235390	335604	1992-09-21 00:21:05	Follow up US	Revised	Present	2024-09-25	88.3	329.7	333.1	71.4		Andrea Anderson MD	Estefania Traun, RDMS	2024-09-15	3320	F	Y
2024-09-04	4258344	590865	1995-01-24 09:19:41	Comp Basic US	Finalized	Present	2024-09-25	85.3	337.6	328.8	69.3		Jennifer Jenson MD	Laura Gavva, RDMS	2024-09-04	3030	F	Y
2024-09-04	4100855	740729	1986-12-26 12:14:03	Comp Detailed US	Finalized	Present	2025-02-04	42.5	160.9	140.8	30.4	male	Andrea Anderson MD	Angelica Zunj, RDMS	2025-01-25	3830	M	Y
2024-09-04	4258394	1215491	1984-11-08 23:00:56	Follow up US	Finalized	Present	2024-10-07	83.6	309.1	284	64.4		Jennifer Jenson MD	Leticia Castro, RDMS	2024-09-04	2615	M	Y
2024-09-05	4242467	855867	1984-11-04 00:09:50	Comp Basic US	Finalized	Present	2024-11-20	71.9	278.9	247.2	57.9	male	Fred Fredriskson MD	Veronica Macias, RDMS	2024-11-05	2440	M	Y
2024-09-05	4138903	1396853	1986-07-19 13:52:30	Follow up US	Finalized	Present	2024-10-31	84.9	299.5	301.5	62.1		Andrea Anderson MD	Apoorva Kota, RDMS	2024-10-12	3470	M	Y
2024-09-06	4148629	53949	1993-06-02 19:28:35	Follow up US	Finalized	Present	2024-10-03	94.9	330.6	313	66.2		Jennifer Jenson MD	Tania Smith, RDMS	2024-09-21	2880	M	Y
2024-09-06	4230955	322422	1986-02-05 16:03:16	Follow up US	Finalized	Present	2024-09-29	88.1	331.2	320.3	66.8		William Wilson MD	Natalie Serano, RDMS	2024-09-22	2880	F	Y
2024-09-06	4259460	564537	1992-09-12 00:28:07	Follow up US	Revised	Present	2024-10-29	84.5	296.2	272.2	64.5		William Wilson MD	Apoorva Kota, RDMS	2024-10-28	3420	M	Y
2024-09-06	4210621	920016	1988-08-30 00:21:05	Follow up US	Finalized	Present	2024-09-22	84.7	310.2	329.9	73.9	female	William Wilson MD	Apoorva Kota, RDMS	2024-09-26	3510	F	Y
2024-09-06	4265074	968291	1981-11-03 19:57:25	Comp Basic US	Finalized	Present	2025-02-25	32.2	117.6	96	22	female	Jennifer Jenson MD	Deepa Yow, RDMS	2025-02-03	2925	F	Y
2024-09-06	4187592	1945587	1994-08-22 14:07:58	Follow up US	Finalized	Present	2025-01-09	49.8	190.7	167.5	39.6	female	Andrea Anderson MD	Estefania Traun, RDMS	2025-01-07	3430	F	Y
2024-09-07	4188716	352253	1999-02-04 19:42:39	Follow up US	Finalized	Present	2024-10-14	92.7	337.7	327	70.1		Fred Fredriskson MD	Natalie Serano, RDMS	2026-04-25	3755	F	Y
2024-09-07	4162125	646904	1995-05-26 07:38:26	Follow up US	Finalized	Present	2024-10-02	90.1	326.3	304.1	73.9	male	Fred Fredriskson MD	Tania Smith, RDMS	2024-09-15	2460	M	Y
2024-09-07	4263389	948035	1990-01-18 16:25:46	Follow up US	Finalized	Present	2024-09-27	89.8	306.3	325.2	75.1	female	Jennifer Jenson MD	Vicky Martinez, RDMS	2024-09-26	3805	F	Y
2024-09-07	4042636	1026118	1983-08-10 07:34:13	Follow up US	Finalized	Present	2024-11-30	71.3	251	235.6	54.2		Fred Fredriskson MD	Estefania Traun, RDMS	2024-11-26	2860	F	Y
2024-09-07	4226127	1113223	1988-02-17 04:15:56	Follow up US	Finalized	Present	2024-10-07	92.7	322.7	321.8	65.2		William Wilson MD	Angelica Zunj, RDMS	2024-09-28	3610	M	Y
2024-09-07	4047977	1146100	1985-04-26 22:27:11	Comp Detailed US	Finalized	Present	2025-01-25	46.9	182.8	151.1	38.6	female	William Wilson MD	Natalie Serano, RDMS	2024-12-30	3170	F	Y
2024-09-07	4141495	1685457	1991-05-12 10:37:01	Comp Detailed US	Finalized	Present	2025-01-27	44.4	159.8	136.3	27.4	female	Fred Fredriskson MD	Vicky Martinez, RDMS	2025-01-21	2680	F	Y
2024-09-07	4256060	1943463	1985-12-03 17:17:48	Follow up US	Revised	Present	2024-10-15	92.8	332.9	354.9	65.2		Jennifer Jenson MD	Natalie Serano, RDMS	2024-10-09	3750	F	Y
2024-09-08	4167114	44720	1987-10-26 06:25:18	Follow up US	Finalized	Present	2024-11-05	85.4	304.7	311.3	65.4		William Wilson MD	Natalie Serano, RDMS	2024-10-13	3560	F	Y
2024-09-08	4164616	470543	1999-05-20 09:21:05	Follow up US	Finalized	Present	2024-11-15	76.2	282.4	261.8	60.5	male	William Wilson MD	Estefania Traun, RDMS	2024-11-07	3290	M	N
2024-09-08	4249387	646621	1977-11-20 17:55:04	Follow up US	Finalized	Present	2024-10-11	87.1	313.6	305.2	65.5	female	William Wilson MD	Vicky Martinez, RDMS	2024-10-09	3205	F	Y
2024-09-08	4159687	892424	1991-11-14 06:36:33	Follow up US	Finalized	Present	2024-12-20	63.7	236.9	216.7	48.5	female	Jennifer Jenson MD	Natalie Serano, RDMS	2024-12-13	3155	F	Y
2024-09-08	4271028	1502951	1988-07-05 03:49:13	Follow up US	Finalized	Present	2025-02-28	32.6	111	94.6	16.2		William Wilson MD	Tania Smith, RDMS	2025-02-11	2680	F	Y
2024-09-08	4161821	1588871	1984-08-07 00:40:46	Follow up US	Finalized	Present	2024-09-27	97	355.2	336.1	74.7		Fred Fredriskson MD	Tania Smith, RDMS	2024-09-21	3910	M	Y
2024-09-08	3750868	1941391	1989-11-24 17:10:46	Comp Basic US	Finalized	Present	2024-11-01	82.1	299.4	284.7	63	female	William Wilson MD	Apoorva Kota, RDMS	2024-10-15	2920	F	Y
2024-09-09	4221393	128362	1990-11-01 12:33:45	Follow up US	Finalized	Present	2025-01-05	57.2	206	189.8	43.3	female	William Wilson MD	Estefania Traun, RDMS	2024-11-28	2280	F	Y
2024-09-09	4258847	346690	1995-09-03 08:05:09	Follow up US	Finalized	Present	2024-12-11	65.6	253.5	213.3	51.4		Fred Fredriskson MD	Apoorva Kota, RDMS	2024-12-08	3420	F	Y
2024-09-09	4279417	426024	1985-04-27 20:52:58	Follow up US	Finalized	Present	2024-10-29	86.2	311.7	294.5	66.2		William Wilson MD	Vicky Martinez, RDMS	2024-10-09	2720	F	Y
2024-09-09	4069425	527113	1995-10-20 07:38:26	Comp Detailed US	Finalized	Present	2025-01-29	48.2	176.8	143.9	29.5	female	Jennifer Jenson MD	Veronica Macias, RDMS	2025-01-31	3430	F	Y
2024-09-09	4084400	595437	1989-10-05 20:31:52	Comp Detailed US	Revised	Absent	2025-01-29	55.7	186.8	150.4	32.8	male	Fred Fredriskson MD	Estefania Traun, RDMS	2025-02-01	650	M	N
2024-09-09	4169503	725201	1980-10-01 00:20:23	Follow up US	Finalized	Present	2024-10-15	87.4	329.5	316.4	65.2		Fred Fredriskson MD	Veronica Macias, RDMS	2024-09-29	3400	M	Y
2024-09-10	4112645	1267632	1995-10-24 07:51:05	Comp Detailed US	Finalized	Present	2025-02-03	44.4	164.5	149.8	30.8	female	Fred Fredriskson MD	Apoorva Kota, RDMS	2025-01-22	2670	F	Y
2024-09-11	4084348	13891	1998-02-02 18:07:01	Comp Detailed US	Finalized	Present	2025-01-29	47.2	179.9	154	34.4	female	Andrea Anderson MD	Apoorva Kota, RDMS	2025-01-24	3350	F	Y
2024-09-11	3668315	23450	1993-05-25 20:50:09	Follow up US	Finalized	Present	2024-11-05	86.2	302.4	284.3	61	female	Jennifer Jenson MD	Veronica Macias, RDMS	2024-11-08	3210	F	Y
2024-09-11	4240174	280379	1983-06-02 08:17:48	Follow up US	Finalized	Present	2024-10-11	84.7	312.4	306.6	67.8		Andrea Anderson MD	Apoorva Kota, RDMS	2024-10-05	3020	F	Y
2024-09-11	3927149	363893	1989-11-21 17:24:50	Follow up US	Finalized	Present	2024-11-06	84	304.7	284.4	59.2		Fred Fredriskson MD	Angelica Zunj, RDMS	2024-10-15	3150	F	Y
2024-09-11	4226993	612064	1989-12-29 16:56:43	Comp Detailed US	Finalized	Present	2024-11-09	77	288.3	260.5	56.8	female	William Wilson MD	Apoorva Kota, RDMS	2024-11-04	3000	F	Y
2024-09-11	4170674	1099326	1992-11-12 00:33:45	Follow up US	Finalized	Present	2024-12-03	67	261.4	242.8	54.1		Fred Fredriskson MD	Apoorva Kota, RDMS	2024-11-11	3200	M	Y
2024-09-11	4285737	1826314	1989-11-20 17:41:43	Comp Basic US	Finalized	Present	2024-10-28	85.5	315.5	283.2	64.3		Andrea Anderson MD	Laura Gavva, RDMS	2024-10-26	4065	M	Y
2024-09-12	4187849	100249	2002-09-28 13:34:13	Comp Detailed US	Finalized	Present	2025-02-05	48.5	174.5	140.6	31.2	female	Jennifer Jenson MD	Tania Smith, RDMS	2025-01-12	2930	F	Y
2024-09-12	4169909	112395	1992-09-12 00:26:43	Follow up US	Finalized	Present	2024-10-24	84.5	323.5	305.6	65.6	female	Andrea Anderson MD	Natalie Serano, RDMS	2024-10-13	3270	F	Y
2024-09-12	4172710	459230	1995-03-27 08:54:22	Follow up US	Revised	Present	2024-10-14	82.7	300.4	306.7	64.5	female	Jennifer Jenson MD	Veronica Macias, RDMS	2024-10-08	3640	F	Y
2024-09-12	4138445	478050	1997-12-24 18:14:03	Comp Detailed US	Finalized	Present	2025-02-07	43.4	169.9	145.8	30.8	male	Robbie Robertson DO	Estefania Traun, RDMS	2025-01-30	3760	M	Y
2024-09-12	4289451	563457	2003-04-21 09:40:46	Follow up US	Finalized	Present	2024-12-10	71.5	258.1	237.1	49	male	William Wilson MD	Veronica Macias, RDMS	2024-12-06	3400	M	Y
2024-09-12	4192290	931079	1992-07-20 02:37:30	Follow up US	Revised	Present	2024-12-07	69	259.6	255.9	51.6		Robbie Robertson DO	Apoorva Kota, RDMS	2024-11-27	3560	M	Y
2024-09-12	4178418	1126643	1982-02-04 17:37:30	Follow up US	Finalized	Present	2024-12-24	69.1	254.2	222.6	47.4		William Wilson MD	Tania Smith, RDMS	2024-12-26	3460	M	Y
2024-09-12	4113919	1369608	1989-01-29 23:43:07	Comp Detailed US	Finalized	Present	2025-02-03	48.6	169.9	143.9	29.9	male	Robbie Robertson DO	Veronica Macias, RDMS	2025-01-30	3610	M	Y
2024-09-13	4305971	72088	1986-08-25 13:45:28	Comp Basic US	Finalized	Present	2025-01-01	62.8	237.6	205.5	42.1	female	Jennifer Jenson MD	Kaila Limanjaya, RDMS	2024-12-27	3040	F	Y
2024-09-13	4256163	245399	1981-06-28 20:58:35	Comp Basic US	Finalized	Present	2024-12-04	73.9	271.2	236.4	53.3	male	William Wilson MD	Apoorva Kota, RDMS	2024-11-29	3180	M	Y
2024-09-13	4187031	352253	1998-12-22 19:42:39	Comp Basic US	Finalized	Present	2024-10-15	92.7	330.8	331.1	67.2	male	Robbie Robertson DO	Tania Smith, RDMS	2026-04-24	3755	F	Y
2024-09-13	4078140	589268	1988-02-23 04:01:52	Follow up US	Revised	Present	2024-09-15	98	345.6	349.4	74.3		Robbie Robertson DO	Tania Smith, RDMS	2024-09-18	3710	F	Y
2024-09-13	4230600	960317	1991-11-06 06:19:41	Follow up US	Revised	Absent	2024-11-18	71	266.4	236	54.9	female	Robbie Robertson DO	Vicky Martinez, RDMS	2024-10-24	2285	F	N
2024-09-13	4052923	1319667	1993-02-01 00:26:43	Comp Detailed US	Finalized	Present	2025-02-07	41.2	153.9	129.4	25.7	male	Jennifer Jenson MD	Veronica Macias, RDMS	2025-02-01	2950	M	Y
2024-09-13	4221597	1408707	1986-02-19 16:32:48	Follow up US	Finalized	Present	2024-11-17	87	316.1	292.1	62.7	male	William Wilson MD	Apoorva Kota, RDMS	2024-11-10	3290	M	Y
2024-09-13	4302710	1419073	1990-07-05 13:52:30	Follow up US	Revised	Present	2024-11-16	71.9	283.9	254.1	60.7	male	Robbie Robertson DO	Estefania Traun, RDMS	2024-11-15	3350	M	Y
2024-09-13	4279775	1668898	1988-11-17 01:11:43	Follow up US	Finalized	Present	2025-01-13	57	206.9	181.2	39.4	female	Jennifer Jenson MD	Vicky Martinez, RDMS	2025-01-04	3310	F	Y
2024-09-13	4283238	1796872	1993-12-24 18:19:41	Follow up US	Finalized	Present	2025-01-16	55.7	212.2	171.7	38		Robbie Robertson DO	Estefania Traun, RDMS	2025-01-04	3150	F	Y
2024-09-13	3586743	1921277	1993-07-26 19:10:18	Follow up US	Finalized	Present	2024-10-05	90.4	314.3	326.8	71.1		Robbie Robertson DO	Vicky Martinez, RDMS	2024-09-25	3020	M	Y
2024-09-14	3709640	267559	1995-06-04 08:47:20	Follow up US	Revised	Present	2024-11-08	82.2	290.7	280.3	65.4	female	Robbie Robertson DO	Tania Smith, RDMS	2024-11-01	3090	F	Y
2024-09-14	4035414	636226	1987-11-05 08:03:45	Comp Detailed US	Finalized	Present	2025-02-05	42.8	166	142	33.2	male	William Wilson MD	Veronica Macias, RDMS	2025-01-30	3100	F	Y
2024-09-14	4286092	1362843	1987-11-30 06:50:37	Comp Detailed US	Finalized	Present	2025-02-02	43.8	167.4	146	32.1	female	William Wilson MD	Tania Smith, RDMS	2025-02-07	3760	F	Y
2024-09-14	4294798	1380690	1984-05-05 02:45:56	Follow up US	Finalized	Present	2024-11-16	80.4	287.6	287.6	61		Robbie Robertson DO	Vicky Martinez, RDMS	2024-10-25	2806	F	Y
2024-09-14	4185247	1604342	1988-02-18 03:18:16	Follow up US	Finalized	Present	2024-10-21	89.2	319.1	288.6	69.8	male	William Wilson MD	Natalie Serano, RDMS	2024-09-22	2490	M	Y
2024-09-15	4052158	461930	1984-10-21 02:06:33	Comp Detailed US	Finalized	Present	2025-02-08	45.9	167.6	147.3	30.6	male	Jennifer Jenson MD	Vicky Martinez, RDMS	2025-02-09	3230	M	Y
2024-09-15	4176071	485933	1991-11-24 06:39:22	Comp Detailed US	Finalized	Present	2025-02-08	40.6	156.5	134.8	27.8	male	William Wilson MD	Natalie Serano, RDMS	2025-01-21	2640	M	Y
2024-09-15	4250051	604209	1982-07-27 12:37:58	Follow up US	Finalized	Present	2024-10-21	82.8	301.9	265.9	58.9		Jennifer Jenson MD	Estefania Traun, RDMS	2024-09-18	1665	M	Y
2024-09-15	4245820	666768	1988-03-02 03:37:58	Follow up US	Revised	Present	2024-10-11	85.8	311.2	307.6	73.5	female	William Wilson MD	Vicky Martinez, RDMS	2024-10-11	3120	F	Y
2024-09-16	4256720	102803	1994-01-06 18:54:50	Comp Detailed US	Revised	Present	2025-02-08	40.8	162	135.1	30.5	male	William Wilson MD	Natalie Serano, RDMS	2025-02-01	2910	M	Y
2024-09-16	4310504	201446	1995-08-24 07:06:05	Follow up US	Finalized	Present	2024-10-31	80.5	300.7	280.6	65.9	female	Robbie Robertson DO	Natalie Serano, RDMS	2024-10-30	3350	F	Y
2024-09-16	4311369	213723	1986-11-09 12:47:48	Follow up US	Finalized	Present	2025-01-06	62	221.1	191.7	40.6		Robbie Robertson DO	Juana Manadeva, RDMS	2024-12-02	2395	M	Y
2024-09-16	4112849	1013354	1992-02-11 05:58:35	Comp Detailed US	Finalized	Present	2025-02-07	47.2	169.2	155.4	33.8	female	William Wilson MD	Natalie Serano, RDMS	2025-01-31	4090	F	Y
2024-09-16	3689038	1075108	1989-03-07 22:14:31	Follow up US	Finalized	Present	2024-11-11	87.6	309.7	283.5	63.2		Jennifer Jenson MD	Veronica Macias, RDMS	2024-11-03	3475	M	Y
2024-09-16	4168794	1453700	1982-02-04 16:11:43	Follow up US	Finalized	Present	2024-09-23	95.3	333.8	337.9	71.3		William Wilson MD	Apoorva Kota, RDMS	2024-09-19	3160	F	Y
2024-09-17	4189072	1151440	1995-07-25 08:23:26	Follow up US	Finalized	Present	2024-11-29	72.7	281.5	259.6	57		Fred Fredriskson MD	Apoorva Kota, RDMS	2024-11-27	3130	M	Y
2024-09-18	4261251	91661	1995-04-08 09:53:26	Comp Detailed US	Finalized	Present	2024-11-12	88.9	313	293.7	62.1		Robbie Robertson DO	Apoorva Kota, RDMS	2024-11-05	3780	M	Y
2024-09-18	3947456	197098	1996-07-15 01:41:15	Follow up US	Finalized	Present	2024-11-11	78.5	287.3	270.2	60.8		Fred Fredriskson MD	Angelica Zunj, RDMS	2024-11-06	3030	F	Y
2024-09-18	4145519	484572	1992-12-08 01:28:35	Comp Detailed US	Finalized	Present	2025-02-17	42	161.8	131.1	26.7	male	Robbie Robertson DO	Natalie Serano, RDMS	2025-02-16	3800	M	Y
2024-09-18	4237834	528499	1995-12-18 04:59:31	Follow up US	Finalized	Present	2024-11-01	85	304.4	287.2	66	female	William Wilson MD	Apoorva Kota, RDMS	2024-10-10	2350	F	Y
2024-09-18	4088319	548266	1983-12-22 05:58:35	Follow up US	Finalized	Present	2024-12-09	77.1	273.1	253.2	56	male	Robbie Robertson DO	Angelica Zunj, RDMS	2024-12-01	3505	M	Y
2024-09-18	4318545	560317	1991-09-26 07:58:07	Comp Basic US	Finalized	Present	2025-01-15	54	203.5	196.4	37.5	male	Robbie Robertson DO	Laura Gavva, RDMS	2025-01-17	3190	M	Y
2024-09-18	4210773	576265	2002-07-28 20:29:03	Follow up US	Finalized	Present	2024-12-01	79.5	280.8	263.4	55.3	female	William Wilson MD	Angelica Zunj, RDMS	2025-11-28	2490	M	Y
2024-09-18	4157132	749481	2000-09-16 02:22:01	Comp Detailed US	Finalized	Present	2025-02-19	41.4	154.7	132.1	28.3	male	Robbie Robertson DO	Apoorva Kota, RDMS	2025-02-14	3935	M	Y
2024-09-18	4214129	881566	1982-09-30 12:37:58	Follow up US	Finalized	Present	2024-10-31	86.5	320.7	328.5	69.9	male	Robbie Robertson DO	Veronica Macias, RDMS	2024-10-28	3910	M	Y
2024-09-18	4314673	979848	1990-01-18 16:52:30	Comp Basic US	Finalized	Present	2024-11-30	79	278.2	283.2	52.1	male	William Wilson MD	Veronica Macias, RDMS	2024-11-17	3190	M	Y
2024-09-18	4167827	1084064	1992-01-08 06:53:26	Comp Detailed US	Finalized	Present	2025-02-09	48.6	168.7	144.2	28.9	male	Fred Fredriskson MD	Apoorva Kota, RDMS	2025-01-28	3580	M	Y
2024-09-18	4139261	1179586	1997-04-16 22:25:46	Comp Detailed US	Finalized	Present	2025-02-03	45	172.5	158.3	33.6	female	Fred Fredriskson MD	Natalie Serano, RDMS	2024-12-19	3295	F	Y
2024-09-18	3523801	1306868	1986-03-21 14:57:11	Follow up US	Finalized	Present	2024-10-02	98.5	350.9	361.8	78.1	male	William Wilson MD	Apoorva Kota, RDMS	2024-09-26	3930	M	Y
2024-09-19	4215598	80342	1990-04-16 16:49:41	Comp Detailed US	Finalized	Present	2025-02-01	45.6	177.3	154.2	42.5	male	Fred Fredriskson MD	Tania Smith, RDMS	2025-01-21	3160	M	Y
2024-09-19	3870064	358714	1992-11-16 00:11:15	Follow up US	Finalized	Present	2024-11-12	77.2	276.3	287.1	60.5		Robbie Robertson DO	Apoorva Kota, RDMS	2024-10-24	2650	F	Y
2024-09-19	4157594	366379	1998-05-26 15:46:24	Comp Detailed US	Finalized	Present	2025-02-11	42.5	157.7	140.5	29.2	female	Robbie Robertson DO	Apoorva Kota, RDMS	2025-02-04	3360	F	Y
2024-09-19	4291285	1164062	1998-08-17 14:33:16	Comp Detailed US	Finalized	Present	2025-01-18	55.3	203.8	178.2	39.8	female	Fred Fredriskson MD	Estefania Traun, RDMS	2025-01-15	3620	F	Y
2024-09-19	4068355	1246292	1986-02-24 17:27:39	Comp Detailed US	Finalized	Present	2025-02-07	46.7	172	149.9	33.4	female	Fred Fredriskson MD	Angelica Zunj, RDMS	2025-02-09	3490	F	Y
2024-09-19	4075235	1351789	1993-05-29 21:37:58	Comp Detailed US	Finalized	Present	2025-02-13	42.7	157.4	138.2	28.4	female	Robbie Robertson DO	Natalie Serano, RDMS	2025-01-07	2160	F	Y
2024-09-19	4136969	1690954	1999-11-23 07:25:46	Comp Detailed US	Finalized	Present	2025-02-12	44.4	155.1	141.6	27.8	female	Fred Fredriskson MD	Angelica Zunj, RDMS	2025-02-05	3470	F	Y
2024-09-19	4283595	1776674	1988-02-15 03:52:01	Follow up US	Finalized	Present	2024-10-01	92.6	329.4	342.1	73	male	Fred Fredriskson MD	Angelica Zunj, RDMS	2024-09-30	3250	M	Y
2024-09-19	4174647	1984979	1993-12-24 18:33:45	Comp Detailed US	Finalized	Present	2025-02-14	45.8	171.3	142.9	27.7	male	William Wilson MD	Veronica Macias, RDMS	2025-02-08	3250	M	Y
2024-09-20	4314775	1267822	1993-10-08 19:21:33	Comp Detailed US	Finalized	Present	2025-01-20	51.9	199.2	177.2	38.9	female	Robbie Robertson DO	Apoorva Kota, RDMS	2025-01-18	3480	F	Y
2024-09-20	4203798	1468521	1984-01-04 05:17:48	Follow up US	Finalized	Present	2024-11-19	79.6	296.6	269	60.5	male	William Wilson MD	Estefania Traun, RDMS	2024-11-13	3230	M	Y
2024-09-20	4329268	1854108	2000-05-28 02:31:52	Follow up US	Finalized	Present	2024-11-12	84.1	307	268	59.5		Robbie Robertson DO	Laura Gavva, RDMS	2024-11-12	3390	M	Y
2024-09-21	3624228	290873	1996-10-11 23:34:41	Follow up US	Finalized	Present	2024-10-11	84.5	334.5	340.2	71.7		Robbie Robertson DO	Tania Smith, RDMS	2024-10-03	3250	M	Y
2024-09-21	4265176	322422	1985-12-31 16:03:16	Follow up US	Finalized	Present	2024-09-28	86.2	325.1	335.9	70.2		Fred Fredriskson MD	Estefania Traun, RDMS	2024-09-22	2880	F	Y
2024-09-21	3749041	427093	1989-12-20 17:06:33	Follow up US	Finalized	Present	2024-11-14	80.5	293	277.6	61.8		William Wilson MD	Veronica Macias, RDMS	2024-11-14	2980	F	Y
2024-09-21	4245565	1075271	1990-03-17 18:01:24	Comp Detailed US	Finalized	Present	2025-02-10	46.2	170.6	142	34.7	female	Fred Fredriskson MD	Veronica Macias, RDMS	2025-02-09	3210	F	Y
2024-09-21	4226229	1417740	1981-11-09 18:26:00	Follow up US	Finalized	Present	2024-10-31	89.7	326	306.3	65.8		William Wilson MD	Natalie Serano, RDMS	2024-10-27	3555	M	Y
2024-09-21	4304492	1539883	1985-07-30 21:14:03	Comp Detailed US	Finalized	Present	2025-02-10	43	170.5	141.7	31.7	female	William Wilson MD	Natalie Serano, RDMS	2025-02-04	3730	F	Y
2024-09-22	4299800	174046	1983-12-21 07:20:09	Comp Detailed US	Revised	Present	2025-02-14	42.2	169.5	144.3	36	female	Fred Fredriskson MD	Tania Smith, RDMS	2025-02-08	3380	F	Y
2024-09-22	4158977	312429	1989-02-27 00:07:01	Comp Detailed US	Finalized	Present	2025-02-13	40.8	161	141.4	29.3	female	Fred Fredriskson MD	Tania Smith, RDMS	2025-01-28	2890	F	Y
2024-09-22	4295154	619526	1986-05-15 16:42:39	Comp Detailed US	Finalized	Present	2025-01-29	54.3	189.8	162.4	38.1	male	William Wilson MD	Tania Smith, RDMS	2025-01-28	3020	M	Y
2024-09-22	4321075	1683549	1996-08-17 00:39:22	Follow up US	Finalized	Present	2024-10-03	88.2	327.1	341.9	76	female	William Wilson MD	Veronica Macias, RDMS	2024-10-03	3480	F	Y
2024-09-24	4171334	1773145	2003-07-25 09:21:05	Comp Detailed US	Finalized	Present	2025-02-21	43.5	147.2	126.5	25.6	male	Jennifer Jenson MD	Estefania Traun, RDMS	2025-02-22	3270	M	Y
2024-09-25	4322606	1150130	1987-03-10 10:10:18	Comp Detailed US	Finalized	Present	2024-12-03	76	283.4	258.1	58	male	Robbie Robertson DO	Apoorva Kota, RDMS	2024-12-02	3410	M	Y
2024-09-25	4341123	1801514	1990-11-25 12:43:35	Comp Basic US	Finalized	Present	2025-01-02	68.7	245	215	46.1	male	Fred Fredriskson MD	Matthea Gregorio, RDMS	2024-12-14	3020	M	Y
2024-09-26	4067386	3986	1993-09-02 20:55:46	Comp Detailed US	Finalized	Present	2025-02-09	46.9	174.1	159.3	31.6	male	Robbie Robertson DO	Angelica Zunj, RDMS	2025-02-06	3980	M	Y
2024-09-26	4338931	143191	1990-07-13 15:45:00	Comp Detailed US	Finalized	Present	2025-02-19	42.3	158	129	27.5	female	Robbie Robertson DO	Angelica Zunj, RDMS	2025-02-24	3710	F	Y
2024-09-26	4236459	398544	1992-03-07 04:28:35	Follow up US	Finalized	Present	2024-11-21	86.9	302.3	292.4	61.4		Jennifer Jenson MD	Estefania Traun, RDMS	2024-11-19	3775	F	Y
2024-09-26	4266044	412674	1991-12-20 06:15:28	Follow up US	Finalized	Present	2024-12-19	72.8	266.6	233	55.4	male	Robbie Robertson DO	Vicky Martinez, RDMS	2024-12-11	3945	M	Y
2024-09-26	4280797	527113	1995-11-11 07:38:26	Fetal Echo	Finalized	Present	2025-01-29	53.8	200.4	177.2	35.2		Fred Fredriskson MD	Vicky Martinez, RDMS	2025-02-01	3430	F	Y
2024-09-26	4236255	947677	1993-01-25 21:56:15	Follow up US	Finalized	Present	2024-10-17	92.9	328.8	335.4	71.7	male	Robbie Robertson DO	Angelica Zunj, RDMS	2024-10-12	3710	M	Y
2024-09-26	4332977	990199	1993-04-08 21:47:48	Follow up US	Finalized	Present	2024-12-03	80.1	276.2	263.1	55.5		Fred Fredriskson MD	Angelica Zunj, RDMS	2024-11-13	2640	F	Y
2024-09-26	4236766	1035804	1997-03-10 21:02:48	Follow up US	Finalized	Present	2024-10-17	89.3	335.3	315.6	75.6	female	Jennifer Jenson MD	Estefania Traun, RDMS	2024-09-30	2950	F	Y
2024-09-27	4303013	110339	2005-12-01 18:19:41	Follow up US	Finalized	Present	2025-01-13	59.2	228.2	197.3	47.5	male	Jennifer Jenson MD	Natalie Serano, RDMS	2024-12-02	2580	M	Y
2024-09-27	4261554	338827	1993-09-09 18:40:46	Follow up US	Finalized	Present	2024-11-02	77	317.9	302.5	65		Robbie Robertson DO	Natalie Serano, RDMS	2024-11-06	3120	M	Y
2024-09-27	4167674	424918	1994-02-04 18:07:01	Comp Detailed US	Finalized	Present	2025-02-21	46.3	159.7	135	26.2	female	Fred Fredriskson MD	Estefania Traun, RDMS	2025-03-01	3010	F	Y
2024-09-27	4249030	646621	1977-11-09 17:55:04	Follow up US	Revised	Present	2024-10-11	90	327.4	330.3	67	female	Robbie Robertson DO	Apoorva Kota, RDMS	2024-10-07	3205	F	Y
2024-09-27	3743283	899763	1989-08-19 19:20:09	Follow up US	Finalized	Present	2024-10-23	92.6	325.3	332.6	73	female	Jennifer Jenson MD	Apoorva Kota, RDMS	2024-10-23	3670	F	Y
2024-09-27	4267617	968291	1981-10-26 19:57:25	Comp Detailed US	Finalized	Present	2025-02-25	44.1	151.3	139.9	27	female	Fred Fredriskson MD	Tania Smith, RDMS	2025-02-04	2925	F	Y
2024-09-27	4307043	1026118	1983-08-26 07:34:13	Comp Basic US	Finalized	Present	2024-11-30	74.2	272.3	253.6	61.7	female	Robbie Robertson DO	Estefania Traun, RDMS	2024-11-26	2860	F	Y
2024-09-27	4115455	1432534	1996-02-21 05:44:31	Comp Detailed US	Finalized	Present	2025-02-19	37.8	153.9	132.9	26.7	female	Jennifer Jenson MD	Veronica Macias, RDMS	2025-02-16	3355	F	Y
2024-09-27	4192187	1578045	1984-11-05 01:48:16	Follow up US	Finalized	Present	2025-01-12	61.4	232.4	192.7	46.5	female	Robbie Robertson DO	Vicky Martinez, RDMS	2025-01-14	3420	F	Y
2024-09-28	4277997	44720	1987-09-30 06:25:18	Follow up US	Finalized	Present	2024-11-03	90.3	334.5	326.1	69.9		Robbie Robertson DO	Deepa Yow, RDMS	2024-10-15	3560	F	Y
2024-09-28	4185555	125852	1993-09-17 20:55:46	Comp Detailed US	Finalized	Present	2025-02-15	43.6	171.4	154.9	35.3	female	Robbie Robertson DO	Tania Smith, RDMS	2025-02-10	3470	F	Y
2024-09-28	4280235	725201	1980-10-02 00:20:23	Follow up US	Finalized	Present	2024-10-15	93.7	340.2	356.2	70.1		Jennifer Jenson MD	Veronica Macias, RDMS	2024-09-30	3400	M	Y
2024-09-28	4292297	818581	1991-01-20 11:05:09	Follow up US	Finalized	Present	2024-10-27	91.1	331.3	335.6	70.5	male	Robbie Robertson DO	Vicky Martinez, RDMS	2024-10-22	3785	M	Y
2024-09-28	4295818	892424	1991-11-22 06:36:33	Follow up US	Finalized	Present	2024-12-22	72.5	263.9	235.3	55.4	female	Robbie Robertson DO	Veronica Macias, RDMS	2024-12-13	3155	F	Y
2024-09-28	4304745	1878607	1994-04-03 17:31:52	Comp Detailed US	Finalized	Present	2025-02-18	42.3	165.9	135.5	28.4		Robbie Robertson DO	Deepa Yow, RDMS	2025-02-16	3670	M	Y
2024-09-28	4295563	1972629	1991-05-23 10:10:18	Comp Detailed US	Finalized	Present	2025-02-13	44.5	176.9	152.4	33.4	female	Robbie Robertson DO	Deepa Yow, RDMS	2025-02-18	3630	F	Y
2024-09-29	4252953	94098	2003-03-11 09:29:31	Follow up US	Finalized	Present	2024-11-14	86.4	322.7	275.7	62.9	male	Robbie Robertson DO	Tania Smith, RDMS	2024-10-25	3200	M	Y
2024-09-29	4355147	426024	1985-05-07 20:52:58	Follow up US	Finalized	Present	2024-10-29	91.9	325.4	316	69.1		Robbie Robertson DO	Veronica Macias, RDMS	2024-10-09	2720	F	Y
2024-09-29	4184228	976175	1988-10-30 00:28:07	Follow up US	Finalized	Present	2024-11-22	83.9	298.7	278.7	59.8	male	Robbie Robertson DO	Veronica Macias, RDMS	2024-11-16	3040	M	Y	3020
2024-09-29	4362746	1263923	1986-08-25 12:54:50	Follow up US	Finalized	Present	2024-11-10	78.8	299.3	282.1	59.8		Robbie Robertson DO	Leticia Castro, RDMS	2024-11-02	3200	F	Y
2024-09-29	4299748	1481323	1997-04-08 22:17:20	Follow up US	Finalized	Present	2024-11-22	88.8	312.7	273.5	59.5		Fred Fredriskson MD	Deepa Yow, RDMS	2024-11-23	3610	M	Y
2024-09-30	4331149	112395	1992-09-18 00:26:43	Follow up US	Finalized	Present	2024-10-24	89.4	329	323.8	71.7		Fred Fredriskson MD	Estefania Traun, RDMS	2024-10-13	3270	F	Y
2024-09-30	4114227	224365	1995-03-17 11:34:41	Comp Detailed US	Finalized	Present	2025-02-21	48.8	171.6	128.2	32.9	male	Fred Fredriskson MD	Deepa Yow, RDMS	2025-02-22	3250	M	Y
2024-09-30	3685417	960317	1991-09-17 06:19:41	Follow up US	Finalized	Present	2024-11-19	74.7	279.2	267.1	59.9		Fred Fredriskson MD	Angelica Zunj, RDMS	2024-10-25	2285	F	Y
2024-09-30	3933157	1498858	1995-04-24 09:37:58	Comp Basic US	Finalized	Present	2024-11-17	78.1	296.9	270.5	62.8	male	Robbie Robertson DO	Vicky Martinez, RDMS	2024-11-16	2650	M	Y
2024-09-30	4303319	1943463	1985-11-08 17:17:48	Follow up US	Finalized	Present	2024-10-14	92.8	349.7	378.5	75.6		Jennifer Jenson MD	Estefania Traun, RDMS	2024-10-08	3750	F	Y
2024-10-01	4366458	166113	1990-04-04 16:56:43	Comp Basic US	Finalized	Present	2025-01-21	54.8	208.6	181.5	41.1	female	Jennifer Jenson MD	Laura Gavva, RDMS	2025-01-23	3415	F	Y
2024-10-01	4143585	482758	1986-08-27 15:04:13	Comp Detailed US	Finalized	Present	2025-02-28	44	168.5	145.5	29.1	male	Jennifer Jenson MD	Estefania Traun, RDMS	2025-02-28	4080	M	Y
2024-10-02	4372072	309700	1991-05-25 08:22:01	Follow up US	Finalized	Present	2025-01-13	69.9	248.6	227.7	52	male	Andrea Anderson MD	Matthea Gregorio, RDMS	2024-10-16	1080	M	Y
2024-10-02	4186878	355899	1978-01-29 18:04:55	Comp Detailed US	Finalized	Present	2025-03-03	41.3	157.1	140	28.1	female	Fred Fredriskson MD	Vicky Martinez, RDMS	2025-02-03	2885	F	Y
2024-10-02	3706132	564537	1992-09-24 00:28:07	Follow up US	Finalized	Present	2024-10-31	91.4	328.9	312.5	70.9		Jennifer Jenson MD	Estefania Traun, RDMS	2024-10-27	3420	M	Y
2024-10-02	4263338	1119177	1990-08-17 14:16:24	Comp Detailed US	Finalized	Present	2024-12-10	84.7	291.6	276.4	56.2	male	Fred Fredriskson MD	Veronica Macias, RDMS	2024-12-01	4090	M	Y
2024-10-02	4261860	1626740	1992-04-11 04:42:39	Comp Detailed US	Revised	Present	2025-02-26	38.8	159.3	140.5	31.8	female	William Wilson MD	Angelica Zunj, RDMS	2025-02-03	2270	F	Y
2024-10-02	4231468	1895532	1994-06-06 15:56:15	Comp Detailed US	Finalized	Present	2025-02-24	46.2	170.2	143.6	28.3	male	William Wilson MD	Natalie Serano, RDMS	2025-02-22	3480	M	Y
2024-10-03	4120971	556379	1989-07-04 21:57:39	Comp Detailed US	Finalized	Present	2025-02-25	45.2	166.3	136.8	27.6	male	William Wilson MD	Veronica Macias, RDMS	2025-02-22	3980	M	Y
2024-10-03	4327948	707329	1994-05-11 15:37:58	Follow up US	Finalized	Present	2024-12-27	72	254.6	230.6	52.5	male	William Wilson MD	Veronica Macias, RDMS	2024-12-31	3745	M	Y
2024-10-03	4364064	765182	1991-11-15 06:01:24	Comp Basic US	Finalized	Present	2024-11-23	84.2	301.3	275.4	65	female	Andrea Anderson MD	Estefania Traun, RDMS	2024-11-20	3130	F	Y
2024-10-03	4149039	1304807	1979-03-05 11:38:54	Comp Detailed US	Finalized	Present	2025-02-28	45.6	172	158.2	29	male	William Wilson MD	Tania Smith, RDMS	2025-02-20	3875	M	Y
2024-10-03	4272149	1502951	1988-06-15 03:49:13	Comp Detailed US	Finalized	Present	2025-02-27	41.4	157.4	139.1	30.9	female	Jennifer Jenson MD	Natalie Serano, RDMS	2025-02-11	2680	F	Y
2024-10-03	4174494	1677642	1995-01-08 12:57:39	Comp Detailed US	Finalized	Present	2025-02-26	45.3	164.6	136.4	31.4	male	William Wilson MD	Angelica Zunj, RDMS	2025-02-06	2410	M	Y
2024-10-04	4296021	347364	1989-11-13 19:27:11	Comp Detailed US	Finalized	Present	2025-03-01	45.2	165.7	150	29.1	male	Jennifer Jenson MD	Natalie Serano, RDMS	2025-02-17	4010	M	Y
2024-10-04	4352341	553096	1988-07-31 01:28:35	Follow up US	Finalized	Present	2024-11-28	80.2	315.4	283	68		William Wilson MD	Tania Smith, RDMS	2024-11-05	2920	M	Y
2024-10-04	4347821	612064	1989-12-30 16:56:43	Follow up US	Finalized	Present	2024-11-10	85.4	308.1	293.9	64.3	female	William Wilson MD	Angelica Zunj, RDMS	2024-11-03	3000	F	Y
2024-10-04	4337550	1835807	1987-03-10 11:16:24	Comp Detailed US	Revised	Present	2025-03-01	41.4	161.2	140.4	32.1	female	Fred Fredriskson MD	Estefania Traun, RDMS	2025-02-08	2880	F	Y
2024-10-04	4304643	1855651	2000-06-02 03:19:41	Comp Detailed US	Finalized	Present	2025-02-24	46.8	167.7	143.8	30.2	female	Andrea Anderson MD	Veronica Macias, RDMS	2025-01-13	2190	F	Y
2024-10-05	4264715	855867	1984-11-22 00:09:50	Follow up US	Finalized	Present	2024-11-21	78.4	287.7	280.8	65.1		Fred Fredriskson MD	Estefania Traun, RDMS	2024-11-03	2440	M	Y
2024-10-05	4048181	1146100	1985-03-15 22:27:11	Follow up US	Finalized	Present	2025-01-25	64	240.3	220.5	52.4	female	Jennifer Jenson MD	Tania Smith, RDMS	2024-12-30	3170	F	Y
2024-10-05	4271894	1291585	1983-09-07 08:15:00	Follow up US	Finalized	Present	2025-01-23	57.7	213.7	204.1	39.6		Fred Fredriskson MD	Natalie Serano, RDMS	2024-12-27	2170	M	Y
2024-10-05	4149292	1905678	1991-03-17 10:20:09	Follow up US	Finalized	Present	2024-12-16	75.8	290.5	262.1	55.4		Jennifer Jenson MD	Estefania Traun, RDMS	2024-12-09	3800	F	Y
2024-10-05	4272659	1941391	1989-12-14 17:10:46	Follow up US	Finalized	Present	2024-11-03	86.1	308.9	311.9	71.6	female	William Wilson MD	Vicky Martinez, RDMS	2024-10-16	2920	F	Y
2024-10-06	4296224	470543	1999-04-21 09:21:05	Follow up US	Finalized	Present	2024-11-15	83.6	312	299.6	71.7		Fred Fredriskson MD	Estefania Traun, RDMS	2024-11-09	3290	M	Y
2024-10-07	4383989	131459	1994-12-07 12:26:43	Comp Basic US	Finalized	Present	2025-01-25	60.4	214	193.2	39.9		Andrea Anderson MD	Leticia Castro, RDMS	2025-01-06	2550	M	Y
2024-10-07	4173325	155269	1991-07-23 09:53:26	Comp Detailed US	Finalized	Present	2025-03-08	38.7	150.6	133.8	25.7	female	Fred Fredriskson MD	Veronica Macias, RDMS	2025-02-24	3055	F	Y
2024-10-07	4290062	245399	1981-05-30 20:58:35	Follow up US	Finalized	Present	2024-12-06	82.2	290.5	279.2	57.2	male	Jennifer Jenson MD	Estefania Traun, RDMS	2024-11-28	3180	M	Y
2024-10-07	4280031	346690	1995-07-25 08:05:09	F/U Fetal Echo	Finalized	Present	2024-12-10	80.4	293.5	260.5	61.7		Andrea Anderson MD	Vicky Martinez, RDMS	2024-12-08	3420	F	Y
2024-10-07	4201049	1178144	1992-01-05 06:53:26	Comp Detailed US	Finalized	Present	2025-02-28	47.8	161.9	130.5	30.1	female	Andrea Anderson MD	Estefania Traun, RDMS	2025-02-24	3310	F	Y
2024-10-08	3792288	12768	1992-11-11 00:30:56	Follow up US	Finalized	Present	2024-12-04	85	296.8	295	59.5		Fred Fredriskson MD	Veronica Macias, RDMS	2024-11-24	3100	M	Y
2024-10-08	4384489	1145940	1992-07-06 01:55:18	Comp Basic US	Finalized	Present	2024-12-29	69.4	266	244.3	51.6		Andrea Anderson MD	Juana Manadeva, RDMS	2024-11-03	1490	F	Y
2024-10-09	4313859	197098	1996-08-20 01:41:15	Follow up US	Finalized	Present	2024-11-11	86.1	310.7	306.2	65.7		Robbie Robertson DO	Deepa Yow, RDMS	2024-11-07	3030	F	Y
2024-10-09	4324027	979848	1990-01-16 16:52:30	Follow up US	Finalized	Present	2024-12-01	79.4	300.3	312.6	61.3	male	William Wilson MD	Natalie Serano, RDMS	2024-11-19	3190	M	Y
2024-10-10	4330487	312429	1989-02-18 00:07:01	Fetal Echo	Finalized	Present	2025-02-14	47.7	192.8	161.4	38.2	female	Robbie Robertson DO	Deepa Yow, RDMS	2025-01-28	2890	F	Y
2024-10-10	4253513	487200	1996-09-14 03:07:01	Comp Detailed US	Finalized	Present	2025-03-14	36.3	141.6	128.6	29.1	female	Robbie Robertson DO	Vicky Martinez, RDMS	2025-02-21	2790	F	Y
2024-10-10	4282269	1099326	1992-09-24 00:33:45	Follow up US	Finalized	Present	2024-12-04	81.9	299.5	278.1	61.9		Jennifer Jenson MD	Natalie Serano, RDMS	2024-11-10	3200	M	Y
2024-10-10	4355862	1236561	1984-11-14 01:17:20	Comp Detailed US	Finalized	Present	2025-03-06	45.3	158.3	141.7	30.7	female	Fred Fredriskson MD	Natalie Serano, RDMS	2025-02-18	2395	F	Y
2024-10-10	4224392	1658307	1991-04-16 11:09:22	Comp Detailed US	Finalized	Present	2025-03-04	45.4	164.9	136.4	29.8	male	Jennifer Jenson MD	Deepa Yow, RDMS	2025-02-27	3020	M	Y
2024-10-11	4285023	199222	1995-11-02 06:47:48	Follow up US	Finalized	Present	2024-12-28	68.1	269.4	263.7	57.9	female	Robbie Robertson DO	Apoorva Kota, RDMS	2024-12-22	3810	F	Y
2024-10-11	4302094	354949	1989-07-01 22:14:31	Comp Detailed US	Finalized	Present	2025-03-28	33.2	118.9	100.7	20.2	female	Robbie Robertson DO	Veronica Macias, RDMS	2025-03-22	4080	F	Y
2024-10-11	3893670	563457	2003-04-04 09:40:46	Follow up US	Revised	Present	2024-12-09	82.9	286.9	282	63.9	male	William Wilson MD	Apoorva Kota, RDMS	2024-12-08	3400	M	Y
2024-10-11	4192341	931079	1992-07-17 02:37:30	Follow up US	Finalized	Present	2024-12-06	78.3	298.6	291	65.3		Jennifer Jenson MD	Apoorva Kota, RDMS	2024-11-26	3560	M	Y
2024-10-11	3843050	943879	1987-01-27 11:02:20	Follow up US	Revised	Present	2024-12-04	80.1	300	289.3	63		William Wilson MD	Natalie Serano, RDMS	2024-12-08	3680	F	Y
2024-10-11	4247346	1370229	1986-10-31 13:52:30	Comp Detailed US	Finalized	Present	2025-03-05	46.4	162.5	147.9	30.4	female	William Wilson MD	Veronica Macias, RDMS	2025-01-22	2210	F	Y
2024-10-11	4369619	1553305	1999-08-11 09:39:22	Comp Detailed US	Finalized	Present	2025-02-28	49.8	170.9	139.8	33.5	female	Robbie Robertson DO	Tania Smith, RDMS	2025-02-23	3510	F	Y
2024-10-11	4315793	1743143	1985-05-26 23:05:09	Comp Detailed US	Finalized	Present	2025-03-03	43.3	175	156.4	32.7	female	William Wilson MD	Apoorva Kota, RDMS	2025-02-26	3900	F	Y
2024-10-11	4393726	1854108	2000-06-25 02:31:52	Follow up US	Finalized	Present	2024-11-11	93.2	307.7	295.8	66.2		Andrea Anderson MD	Veronica Macias, RDMS	2024-11-13	3390	M	Y
2024-10-11	4377724	1954288	1978-06-19 15:52:44	Comp Detailed US	Finalized	Present	2025-01-25	64.8	235	205.5	47.8	female	Robbie Robertson DO	Tania Smith, RDMS	2025-01-18	2670	F	Y
2024-10-12	4349136	557613	2001-07-19 21:29:31	Comp Detailed US	Finalized	Present	2025-03-04	46.2	169.2	140.6	32.3	female	William Wilson MD	Veronica Macias, RDMS	2025-02-15	2770	F	Y
2024-10-12	4305564	1408707	1986-02-19 16:32:48	Follow up US	Finalized	Present	2024-11-15	95.7	350.2	342.8	65.6	male	Robbie Robertson DO	Natalie Serano, RDMS	2024-11-10	3290	M	Y
2024-10-12	4157852	1968293	1991-11-14 07:51:05	Comp Detailed US	Finalized	Present	2025-03-04	42.5	159.3	147.6	26.7	male	Robbie Robertson DO	Veronica Macias, RDMS	2025-02-28	3370	M	Y
2024-10-13	4311318	201446	1995-09-27 07:06:05	Follow up US	Finalized	Present	2024-11-01	84.6	317	324.4	69	female	Jennifer Jenson MD	Estefania Traun, RDMS	2024-10-31	3350	F	Y
2024-10-13	4397957	354348	1995-08-05 08:23:26	Follow up US	Finalized	Present	2025-01-03	74.7	279	241.2	54	male	Jennifer Jenson MD	Tania Smith, RDMS	2024-12-26	3570	M	Y
2024-10-13	4310758	629296	1986-06-28 15:45:00	Follow up US	Finalized	Present	2025-01-19	62.3	246.2	215.2	48.5	male	Jennifer Jenson MD	Vicky Martinez, RDMS	2025-01-14	3560	M	Y
2024-10-13	4382053	1045713	1991-07-15 08:07:58	Follow up US	Finalized	Present	2024-10-29	90.7	318.7	316.6	68.4	female	Robbie Robertson DO	Deepa Yow, RDMS	2024-11-01	2960	F	Y
2024-10-13	4396888	1417740	1981-09-19 18:26:00	Follow up US	Finalized	Present	2024-10-31	90.7	329.8	353.8	69.5		William Wilson MD	Apoorva Kota, RDMS	2024-10-28	3555	M	Y
2024-10-13	4303828	1419073	1990-07-10 13:52:30	Follow up US	Finalized	Present	2024-11-16	79.3	301.9	296.3	68.7	male	Robbie Robertson DO	Estefania Traun, RDMS	2024-11-16	3350	M	Y
2024-10-13	4387640	1539883	1985-07-22 21:14:03	Follow up US	Revised	Present	2025-02-10	57.5	206.8	184.6	42.8		Jennifer Jenson MD	Natalie Serano, RDMS	2025-02-04	3730	F	Y
2024-10-14	4412549	39673	1987-07-31 07:51:05	Comp Basic US	Finalized	Present	2024-12-09	77.6	301.2	294	60.6	male	Jennifer Jenson MD	Laura Gavva, RDMS	2024-11-11	2990	M	Y
2024-10-14	4279570	128362	1990-11-25 12:33:45	Follow up US	Revised	Present	2025-01-05	67.4	254.1	242.6	53.8	female	Robbie Robertson DO	Vicky Martinez, RDMS	2024-11-27	2280	F	Y
2024-10-14	4254634	994714	1990-09-10 13:21:33	Follow up US	Finalized	Present	2024-11-28	80.2	311.1	280.3	64.6	female	Robbie Robertson DO	Estefania Traun, RDMS	2024-11-09	2235	F	Y
2024-10-14	4360306	1075108	1989-02-16 22:14:31	Follow up US	Finalized	Present	2024-11-09	93.3	325	305.6	68		Robbie Robertson DO	Apoorva Kota, RDMS	2024-11-03	3475	M	Y
2024-10-14	4379406	1633941	1986-02-13 18:15:28	Comp Detailed US	Finalized	Present	2025-03-07	48.2	174.6	152.3	32.1	female	Jennifer Jenson MD	Vicky Martinez, RDMS	2025-03-10	3520	F	Y
2024-10-14	4383071	1791051	1998-11-24 13:46:52	Comp Detailed US	Finalized	Present	2025-03-16	41.7	143.2	119.6	23.7	male	William Wilson MD	Veronica Macias, RDMS	2025-03-14	2910	M	Y
2024-10-15	4411363	309700	1991-06-04 08:22:01	Follow up US	Finalized	Present	2025-01-13	68.4	248	239.6	52.9	male	Jennifer Jenson MD	Leticia Castro, RDMS	2024-10-16	1080	M	Y
2024-10-16	4340155	990199	1993-04-21 21:47:48	Follow up US	Finalized	Present	2024-12-01	81.9	301.4	289.7	63.8		Fred Fredriskson MD	Natalie Serano, RDMS	2024-11-15	2640	F	Y
2024-10-16	4247806	1849118	1989-02-12 00:26:43	Comp Detailed US	Finalized	Present	2025-03-08	42.4	166	142.3	28.8	male	Robbie Robertson DO	Angelica Zunj, RDMS	2025-03-10	3690	M	Y
2024-10-17	4325047	91661	1995-02-26 09:53:26	Follow up US	Finalized	Present	2024-11-12	92.1	337.9	337.5	69		William Wilson MD	Apoorva Kota, RDMS	2024-11-06	3780	M	Y
2024-10-17	4348833	110339	2005-12-12 18:19:41	Follow up US	Finalized	Present	2025-01-13	71.2	247.5	212.4	51.7	male	Robbie Robertson DO	Veronica Macias, RDMS	2024-11-30	2580	M	Y
2024-10-17	4391430	260622	1993-03-28 23:15:00	Comp Detailed US	Revised	Present	2025-03-09	47	176.5	154.2	33.3	female	Robbie Robertson DO	Natalie Serano, RDMS	2025-02-22	3200	F	Y
2024-10-17	4425319	282971	1989-10-11 17:37:30	Comp Basic US	Finalized	Present	2025-01-03	74.2	263.5	233	48.8		William Wilson MD	Cecilia Moradi, RDMS	2024-09-29	1540	M	Y
2024-10-17	4400506	576265	2002-06-16 20:29:03	Follow up US	Finalized	Present	2024-12-03	83.5	304.3	320.8	67.3	female	Andrea Anderson MD	Natalie Serano, RDMS	2025-11-28	2490	M	Y
2024-10-17	4381495	768638	1992-01-12 05:27:39	Comp Basic US	Finalized	Present	2025-01-08	70.5	269.8	228.2	50.7	male	Andrea Anderson MD	Estefania Traun, RDMS	2025-01-02	3290	M	Y
2024-10-17	3743436	899763	1989-09-01 19:20:09	Follow up US	Finalized	Present	2024-10-23	95.7	339.5	358.8	75.1	female	William Wilson MD	Estefania Traun, RDMS	2024-10-21	3670	F	Y
2024-10-18	4233349	152535	1991-07-17 09:36:33	Comp Detailed US	Finalized	Present	2025-03-07	46.9	168.3	149.1	33	female	Robbie Robertson DO	Apoorva Kota, RDMS	2025-02-24	2620	F	Y
2024-10-18	4366867	548266	1983-11-15 05:58:35	Follow up US	Finalized	Present	2024-12-11	85.4	312.3	296.4	64.8		William Wilson MD	Vicky Martinez, RDMS	2024-11-30	3505	M	Y
2024-10-18	4229581	871536	2000-10-23 02:20:37	Comp Detailed US	Finalized	Present	2025-03-14	42.5	157.9	141.5	31.5	female	Robbie Robertson DO	Apoorva Kota, RDMS	2025-02-22	3075	F	Y
2024-10-18	4400557	881566	1982-09-15 12:37:58	Follow up US	Finalized	Present	2024-11-02	96	351.9	350	73.9	male	William Wilson MD	Angelica Zunj, RDMS	2024-10-29	3910	M	Y
2024-10-18	4191727	1326604	1992-02-04 06:05:37	Comp Detailed US	Finalized	Present	2025-03-09	49.2	170.4	142.4	30.4	male	William Wilson MD	Apoorva Kota, RDMS	2025-02-15	2530	M	Y
2024-10-18	4321788	1468521	1984-01-20 05:17:48	Follow up US	Finalized	Present	2024-11-20	87.1	306	301	66.4	male	Robbie Robertson DO	Apoorva Kota, RDMS	2024-11-12	3230	M	Y
2024-10-18	4421145	1670365	1990-08-26 14:54:22	Follow up US	Finalized	Present	2025-03-26	39.2	140.7	114.7	24.4		Fred Fredriskson MD	Estefania Traun, RDMS	2025-01-12	1725	M	Y
2024-10-19	4327897	80342	1990-03-12 16:49:41	Follow up US	Finalized	Present	2025-01-31	60.1	220.6	201.1	44.3	male	Robbie Robertson DO	Vicky Martinez, RDMS	2025-01-20	3160	M	Y
2024-10-19	4366919	94098	2003-03-10 09:29:31	Follow up US	Finalized	Present	2024-11-13	94.9	318.3	308.6	66.4		William Wilson MD	Veronica Macias, RDMS	2024-10-26	3200	M	Y
2024-10-19	4242722	234387	1997-09-14 20:54:22	Comp Detailed US	Finalized	Present	2025-03-17	41.5	158.4	134.4	26.6	male	Robbie Robertson DO	Apoorva Kota, RDMS	2025-03-14	3720	M	Y
2024-10-19	4422465	1270690	1987-07-02 07:58:07	Follow up US	Finalized	Present	2024-10-26	98.9	339.7	328.2	77	male	William Wilson MD	Angelica Zunj, RDMS	2024-10-20	3600	M	Y
2024-10-19	4216004	1590132	1995-10-24 08:36:05	Comp Detailed US	Finalized	Present	2025-03-07	46.1	173.7	147.8	31	female	William Wilson MD	Veronica Macias, RDMS	2025-02-26	3200	F	Y
2024-10-19	4173172	1633712	1996-07-06 02:48:45	Follow up US	Finalized	Present	2025-01-08	76.9	274.4	255.1	56.8	female	Robbie Robertson DO	Angelica Zunj, RDMS	2024-12-28	3740	F	Y
2024-10-19	4288942	1640312	1986-08-20 15:25:18	Comp Detailed US	Finalized	Present	2025-03-12	40.3	161.4	139.3	28.7	female	William Wilson MD	Apoorva Kota, RDMS	2025-02-22	2565	F	Y
2024-10-19	4251679	1992513	1994-04-19 17:54:22	Comp Detailed US	Finalized	Present	2025-03-13	44.6	159.5	127.5	28.7	female	Robbie Robertson DO	Estefania Traun, RDMS	2025-03-09	2580	F	Y
2024-10-20	4408094	818581	1990-12-14 11:05:09	Follow up US	Finalized	Present	2024-10-27	95.4	340.5	365.8	75.2		Robbie Robertson DO	Angelica Zunj, RDMS	2024-10-22	3785	M	Y
2024-10-20	4386311	905067	1989-06-19 20:17:48	Comp Basic US	Finalized	Present	2024-12-11	79.6	273.5	261.9	65.6	female	William Wilson MD	Apoorva Kota, RDMS	2024-11-19	2250	F	Y
2024-10-20	4416567	1179586	1997-03-23 22:25:46	Follow up US	Finalized	Present	2025-02-03	58.6	222.7	214.9	44.6		William Wilson MD	Vicky Martinez, RDMS	2024-12-17	3295	F	Y
2024-10-20	4251832	1253519	1986-08-31 15:11:15	Comp Detailed US	Finalized	Present	2025-03-15	42.3	162.5	145.7	30	female	Robbie Robertson DO	Apoorva Kota, RDMS	2025-03-07	3970	F	Y
2024-10-20	4296887	1404607	1989-12-23 17:44:31	Follow up US	Finalized	Present	2024-12-28	76	288.7	265.4	56.2	male	William Wilson MD	Veronica Macias, RDMS	2024-12-19	3180	M	Y
2024-10-20	4285635	1406369	1988-03-10 05:50:09	Comp Detailed US	Finalized	Present	2025-03-13	41.3	165.4	147.1	31.9	male	Fred Fredriskson MD	Natalie Serano, RDMS	2025-03-03	2380	M	Y
2024-10-20	4199726	1829980	1988-03-14 06:12:39	Comp Detailed US	Finalized	Present	2025-03-18	41.2	158.6	136.8	29.6		Robbie Robertson DO	Veronica Macias, RDMS	2025-03-02	2960	M	Y
2024-10-20	4374259	1920477	1996-08-02 03:26:43	Comp Detailed US	Finalized	Present	2025-03-14	47.2	167.1	145.4	29	male	Robbie Robertson DO	Natalie Serano, RDMS	2025-03-08	3110	M	Y
2024-10-21	4361884	427093	1990-01-09 17:06:33	Follow up US	Finalized	Present	2024-11-15	87.8	305.7	317.6	66.7		Robbie Robertson DO	Natalie Serano, RDMS	2024-11-13	2980	F	Y
2024-10-21	4433968	758426	2001-03-17 22:03:16	Follow up US	Finalized	Present	2024-12-05	88.9	326.6	288.6	68.6	male	Robbie Robertson DO	Juana Manadeva, RDMS	2024-10-25	2385	M	Y
2024-10-21	4366971	960317	1991-11-10 06:19:41	Follow up US	Finalized	Present	2024-11-17	82.3	304.7	300.4	66.4		Robbie Robertson DO	Veronica Macias, RDMS	2024-10-24	2285	F	Y
2024-10-21	4362545	1498858	1995-04-19 09:37:58	Follow up US	Finalized	Present	2024-11-17	85.4	318.4	296.9	66.4	male	William Wilson MD	Vicky Martinez, RDMS	2024-11-15	2650	M	Y
2024-10-22	4336989	527113	1995-10-03 07:38:26	Follow up US	Finalized	Present	2025-01-29	68.9	254.7	218.4	48.7		Fred Fredriskson MD	Natalie Serano, RDMS	2025-02-01	3430	F	Y
2024-10-22	4119133	1747882	1999-11-23 06:09:50	Follow up US	Finalized	Present	2024-12-18	77.7	294.2	286.6	61.5	male	Jennifer Jenson MD	Veronica Macias, RDMS	2024-12-07	3375	M	Y
2024-10-23	4300971	423826	1987-02-19 12:12:39	Comp Detailed US	Finalized	Present	2025-03-16	44.1	163.7	141.1	30.1	female	Jennifer Jenson MD	Vicky Martinez, RDMS	2025-03-12	3700	F	Y
2024-10-23	4441698	613006	1984-03-26 03:37:58	Comp Basic US	Finalized	Present	2025-01-25	63.4	240	230.7	50.9	male	Jennifer Jenson MD	Leticia Castro, RDMS	2024-11-06	1335	M	Y
2024-10-23	4389997	1024125	1996-11-19 02:07:58	Comp Detailed US	Finalized	Present	2025-03-19	43.3	154.5	127.1	27.6	female	Robbie Robertson DO	Apoorva Kota, RDMS	2025-03-02	2430	F	Y
2024-10-23	4441598	1145940	1992-06-26 01:55:18	Follow up US	Finalized	Present	2024-12-28	74	267.3	247.6	56.3		Jennifer Jenson MD	Laura Gavva, RDMS	2024-11-03	1490	F	Y
2024-10-23	4286041	1670365	1990-07-18 14:54:22	Comp Detailed US	Finalized	Present	2025-03-26	44.3	152.3	126	26.2	male	Jennifer Jenson MD	Natalie Serano, RDMS	2025-01-11	1725	M	Y
2024-10-24	4409013	23450	1993-05-20 20:50:09	Follow up US	Finalized	Present	2024-11-06	94.8	337.5	323.6	70.7	female	Robbie Robertson DO	Veronica Macias, RDMS	2024-11-10	3210	F	Y
2024-10-24	4449438	174046	1983-12-08 07:20:09	Follow up US	Finalized	Present	2025-02-14	59.4	227.1	202.9	42.5		Fred Fredriskson MD	Matthea Gregorio, RDMS	2025-02-08	3380	F	Y
2024-10-24	4240634	354774	1992-07-01 03:28:07	Follow up US	Finalized	Present	2025-01-14	64.7	261.7	225.6	50.9	female	Robbie Robertson DO	Vicky Martinez, RDMS	2025-01-08	3440	F	Y
2024-10-24	3760008	412674	1991-12-16 06:15:28	Follow up US	Finalized	Present	2024-12-18	85.4	302.9	271.9	66.2	male	Robbie Robertson DO	Vicky Martinez, RDMS	2024-12-11	3945	M	Y
2024-10-24	4216257	811181	1989-02-23 23:02:20	Follow up US	Finalized	Present	2025-01-18	75.6	261	237.6	48.6	female	Jennifer Jenson MD	Apoorva Kota, RDMS	2025-01-10	3025	F	Y
2024-10-24	4224595	921010	1990-09-07 15:30:56	Comp Detailed US	Finalized	Present	2025-03-20	41.5	159.5	141.3	25.7	female	Fred Fredriskson MD	Prithi Dokania, RDMS	2025-03-20	3190	F	Y
2024-10-24	4191931	1578045	1984-10-20 01:48:16	Follow up US	Finalized	Present	2025-01-12	75	272.8	257.6	56.3	female	Jennifer Jenson MD	Apoorva Kota, RDMS	2025-01-12	3420	F	Y
2024-10-25	4375176	267559	1995-05-01 08:47:20	Follow up US	Finalized	Present	2024-11-10	88	318.4	345.7	71.1	female	Robbie Robertson DO	Veronica Macias, RDMS	2024-11-01	3090	F	Y
2024-10-25	4299545	274108	1989-04-30 23:12:11	Comp Detailed US	Finalized	Present	2025-03-22	42.2	155.6	146.8	33	female	Jennifer Jenson MD	Vicky Martinez, RDMS	2025-03-04	3190	F	Y
2024-10-25	4403413	337493	1991-01-12 12:14:03	Comp Detailed US	Finalized	Present	2025-01-17	77.8	277.6	234.9	55.1	male	Robbie Robertson DO	Natalie Serano, RDMS	2025-01-11	3290	M	Y
2024-10-25	4403716	386742	1990-05-14 16:45:28	Comp Detailed US	Finalized	Present	2025-03-17	42.5	162.1	147.8	30.1	female	Jennifer Jenson MD	Apoorva Kota, RDMS	2025-03-17	3000	F	Y
2024-10-25	4382665	482758	1986-09-05 15:04:13	Fetal Echo	Finalized	Present	2025-02-28	55.2	210.4	190.2	37		Robbie Robertson DO	Estefania Traun, RDMS	2025-02-28	4080	M	Y
2024-10-25	4399944	1460249	2001-05-02 23:54:22	Comp Detailed US	Finalized	Present	2025-03-26	38.6	151	134.4	26.5	female	Robbie Robertson DO	Veronica Macias, RDMS	2025-03-31	3530	F	Y
2024-10-25	4448573	1552005	1991-08-30 07:30:00	Follow up US	Finalized	Present	2024-12-04	81.5	298.2	301.2	61.8		Robbie Robertson DO	Laura Gavva, RDMS	2024-11-27	3065	F	Y
2024-10-26	4396581	46773	1988-02-10 06:32:20	Comp Detailed US	Finalized	Present	2025-03-21	48	164.7	145.1	28.5	female	Jennifer Jenson MD	Apoorva Kota, RDMS	2025-03-15	3070	F	Y
2024-10-26	4450604	89353	1986-03-01 16:42:39	Follow up US	Finalized	Present	2024-12-03	87.9	333.4	317.3	69.2		Fred Fredriskson MD	Laura Gavva, RDMS	2024-11-03	3060	M	Y
2024-10-26	4355503	125852	1993-08-20 20:55:46	Follow up US	Finalized	Present	2025-02-15	58.8	210.4	191.8	42.9	female	Robbie Robertson DO	Prithi Dokania, RDMS	2025-02-11	3470	F	Y
2024-10-26	4381750	155269	1991-07-03 09:53:26	Follow up US	Revised	Present	2025-03-08	46	188.9	161.3	39.5		Fred Fredriskson MD	Veronica Macias, RDMS	2025-02-24	3055	F	Y
2024-10-26	4120615	711422	1989-11-28 18:35:09	Follow up US	Finalized	Present	2024-12-20	78.4	283.3	273.7	62.8		Robbie Robertson DO	Apoorva Kota, RDMS	2024-12-18	3160	M	Y
2024-10-26	4372835	855867	1984-11-27 00:09:50	Follow up US	Finalized	Present	2024-11-20	84.9	315.1	307.6	70.5		Fred Fredriskson MD	Natalie Serano, RDMS	2024-11-04	2440	M	Y
2024-10-26	4252698	934350	1989-03-20 00:16:52	Comp Detailed US	Finalized	Present	2025-03-21	41.4	163.2	145.5	26	male	Robbie Robertson DO	Veronica Macias, RDMS	2025-03-09	3060	M	Y
2024-10-26	4424451	968291	1981-10-25 19:57:25	Follow up US	Finalized	Present	2025-02-25	53.2	205.6	186.1	40.1		Jennifer Jenson MD	Veronica Macias, RDMS	2025-02-02	2925	F	Y
2024-10-26	4409622	979848	1990-02-01 16:52:30	Follow up US	Finalized	Present	2024-12-02	86.6	315.9	323.4	63.7		Fred Fredriskson MD	Estefania Traun, RDMS	2024-11-18	3190	M	Y
2024-10-26	4345973	1026118	1983-08-08 07:34:13	Follow up US	Finalized	Present	2024-12-01	84.6	296.8	288.4	64.7	female	Robbie Robertson DO	Estefania Traun, RDMS	2024-11-24	2860	F	Y
2024-10-27	4453299	338827	1993-09-24 18:40:46	Follow up US	Finalized	Present	2024-11-02	85.4	323.9	332.2	73.9	male	Robbie Robertson DO	Vicky Martinez, RDMS	2024-11-08	3120	M	Y
2024-10-27	4349696	534552	1988-04-13 05:34:41	Comp Detailed US	Finalized	Present	2025-03-28	41.8	151.2	127.2	27.6	female	Robbie Robertson DO	Natalie Serano, RDMS	2025-03-03	2410	F	Y
2024-10-27	4357600	892424	1991-10-28 06:36:33	Follow up US	Revised	Present	2024-12-20	82.9	302.9	273.5	65.7		Jennifer Jenson MD	Vicky Martinez, RDMS	2024-12-13	3155	F	Y
2024-10-27	4356016	1668898	1988-10-02 01:11:43	Follow up US	Finalized	Present	2025-01-13	75	265.3	245.6	57.6		Fred Fredriskson MD	Vicky Martinez, RDMS	2025-01-04	3310	F	Y
2024-10-27	4380169	1835807	1987-03-22 11:16:24	Fetal Echo	Finalized	Present	2025-02-27	49.8	195.5	172.2	36.5		Fred Fredriskson MD	Estefania Traun, RDMS	2025-02-08	2880	F	Y
2024-10-28	4455493	887661	1996-02-26 07:01:52	Follow up US	Finalized	Present	2025-03-28	42.6	152.3	124.7	27.7		Robbie Robertson DO	Deepa Yow, RDMS	2025-03-31	3690	M	Y
2024-10-28	4293166	1588264	1992-10-27 01:59:31	Comp Detailed US	Finalized	Present	2025-03-17	49.7	189.1	152.7	34.7	male	Robbie Robertson DO	Estefania Traun, RDMS	2025-02-07	2615	M	Y
2024-10-29	4380937	470543	1999-05-04 09:21:05	Follow up US	Finalized	Present	2024-11-15	90.8	326	324.9	75		Jennifer Jenson MD	Veronica Macias, RDMS	2024-11-09	3290	M	Y
2024-10-29	4255704	1996959	1985-07-17 22:28:35	Comp Detailed US	Finalized	Present	2025-03-25	44.2	157.7	135.9	32.2	female	Jennifer Jenson MD	Veronica Macias, RDMS	2025-03-15	3310	F	Y
2024-10-30	4464254	990199	1993-04-28 21:47:48	Follow up US	Finalized	Present	2024-12-03	86.8	309.6	311.3	66		Andrea Anderson MD	Veronica Macias, RDMS	2024-11-14	2640	F	Y
2024-10-30	4324689	1553089	1992-04-05 06:22:30	Comp Detailed US	Finalized	Present	2025-03-30	41.1	154	126	30.6		Robbie Robertson DO	Deepa Yow, RDMS	2025-03-25	4000	M	Y
2024-10-30	4369567	1855651	2000-07-01 03:19:41	Follow up US	Finalized	Present	2025-02-25	58.6	207.6	194.2	41.7	female	Andrea Anderson MD	Prithi Dokania, RDMS	2025-01-14	2190	F	Y
2024-10-31	4306634	108049	1977-08-28 20:45:56	Comp Detailed US	Finalized	Present	2025-03-18	46.2	178.4	157.5	30.4	female	Robbie Robertson DO	Prithi Dokania, RDMS	2025-02-19	3090	F	Y
2024-10-31	4461506	616107	1987-09-13 07:20:09	Comp Basic US	Finalized	Present	2024-12-26	76.4	283.6	265.8	64.7		Robbie Robertson DO	Kaila Limanjaya, RDMS	2024-11-08	1780	F	Y
2024-10-31	4386158	976175	1988-11-17 00:28:07	Follow up US	Finalized	Present	2024-11-21	89.2	328.4	327.1	68	male	Andrea Anderson MD	Natalie Serano, RDMS	2024-11-16	3040	M	Y
2024-10-31	4229274	977532	1987-12-08 05:51:33	Follow up US	Finalized	Present	2024-12-22	84.8	304	269.2	64.4	male	William Wilson MD	Vicky Martinez, RDMS	2024-12-20	2950	M	Y
2024-10-31	4372375	1146100	1985-05-03 22:27:11	Follow up US	Finalized	Present	2025-01-25	73.1	270.8	270	60.3	female	Jennifer Jenson MD	Apoorva Kota, RDMS	2024-12-30	3170	F	Y
2024-10-31	4402135	1408707	1986-03-03 16:32:48	Follow up US	Finalized	Present	2024-11-16	99.6	335.6	350.5	74.5	male	Jennifer Jenson MD	Vicky Martinez, RDMS	2024-11-11	3290	M	Y
2024-10-31	4184687	1479611	1991-03-18 12:00:00	Comp Detailed US	Finalized	Present	2025-03-26	47.7	180.6	144.2	27	male	William Wilson MD	Natalie Serano, RDMS	2025-03-20	3190	M	Y
2024-11-01	4317221	124785	1981-08-18 21:05:37	Comp Detailed US	Finalized	Present	2025-03-24	40.3	166	138.7	28.2	male	William Wilson MD	Prithi Dokania, RDMS	2025-02-28	2900	M	Y
2024-11-01	4379610	347364	1989-12-28 19:27:11	Follow up US	Revised	Present	2025-03-01	56.2	208.3	203.7	40	male	Jennifer Jenson MD	Apoorva Kota, RDMS	2025-02-17	4010	M	Y
2024-11-01	4369670	765182	1991-11-25 06:01:24	Follow up US	Revised	Present	2024-11-24	88.5	313.1	321.4	76	female	Andrea Anderson MD	Veronica Macias, RDMS	2024-11-21	3130	F	Y
2024-11-01	4297599	931079	1992-06-24 02:37:30	Follow up US	Finalized	Present	2024-12-06	84.4	308.5	323.8	70.8		Jennifer Jenson MD	Vicky Martinez, RDMS	2024-11-27	3560	M	Y
2024-11-01	4460487	994714	1990-09-11 13:21:33	Comp Basic US	Finalized	Present	2024-11-28	85.5	317	288.9	65.8	female	Robbie Robertson DO	Angelica Zunj, RDMS	2024-11-08	2235	F	Y
2024-11-01	4477854	1099326	1992-09-18 00:33:45	Follow up US	Finalized	Present	2024-12-02	91.7	327	327	71.1		Jennifer Jenson MD	Juana Manadeva, RDMS	2024-11-12	3200	M	Y
2024-11-01	4370949	1147226	1983-03-27 12:23:54	Comp Detailed US	Finalized	Present	2025-03-28	45.5	162.3	129.5	30.2		Robbie Robertson DO	Veronica Macias, RDMS	2025-03-23	3530	F	Y
2024-11-02	4361427	647876	1991-05-05 11:19:13	Comp Detailed US	Finalized	Present	2025-03-31	37.7	148.7	122	25.4	female	Jennifer Jenson MD	Vicky Martinez, RDMS	2025-03-25	3120	F	Y
2024-11-02	4423636	704931	1990-02-15 19:03:16	Comp Detailed US	Finalized	Present	2025-03-21	44.5	170.6	154.7	34.5	male	Robbie Robertson DO	Estefania Traun, RDMS	2025-03-14	4070	M	Y
2024-11-02	4397651	707329	1994-06-02 15:37:58	Follow up US	Finalized	Present	2024-12-27	83.2	303.4	274.9	62.6	male	Robbie Robertson DO	Veronica Macias, RDMS	2025-01-01	3745	M	Y
2024-11-02	4255192	1197763	1988-08-04 01:55:18	Follow up US	Finalized	Present	2024-12-23	84.3	292	274.4	58.8	female	Robbie Robertson DO	Prithi Dokania, RDMS	2024-11-12	1770	F	Y
2024-11-02	4401218	1424717	1996-03-24 06:00:00	Follow up US	Finalized	Present	2025-04-15	34.1	125.3	108.6	21.3		Robbie Robertson DO	Natalie Serano, RDMS	2025-03-23	2935	M	Y
2024-11-02	4478667	1854108	2000-06-16 02:31:52	Follow up US	Finalized	Present	2024-11-11	97.9	328.9	330.4	69.5		William Wilson MD	Apoorva Kota, RDMS	2024-11-14	3390	M	Y
2024-11-02	4426535	1878607	1994-04-03 17:31:52	F/U Fetal Echo	Finalized	Present	2025-02-18	62.7	218.4	193.9	43.8		Robbie Robertson DO	Vicky Martinez, RDMS	2025-02-17	3670	M	Y
2024-11-03	4475912	199222	1995-12-09 06:47:48	Follow up US	Finalized	Present	2024-12-27	82.3	299.2	304.7	63.3	female	Robbie Robertson DO	Veronica Macias, RDMS	2024-12-20	3810	F	Y
2024-11-03	4381699	245399	1981-06-05 20:58:35	Follow up US	Finalized	Present	2024-12-06	92	310.9	323.2	66.3	male	Robbie Robertson DO	Vicky Martinez, RDMS	2024-11-28	3180	M	Y
2024-11-03	4383276	346690	1995-08-18 08:05:09	Follow up US	Finalized	Present	2024-12-10	94.3	327.4	306.9	68		Jennifer Jenson MD	Apoorva Kota, RDMS	2024-12-06	3420	F	Y
2024-11-03	4228058	419054	1987-08-13 09:36:33	Comp Detailed US	Finalized	Present	2025-03-22	48.8	187.4	143.9	29.8	female	Jennifer Jenson MD	Veronica Macias, RDMS	2025-03-21	2905	F	Y
2024-11-03	4475303	598963	1996-07-14 02:03:45	Comp Basic US	Finalized	Present	2025-01-29	73.8	262.9	257.7	50.3	male	Jennifer Jenson MD	Kaila Limanjaya, RDMS	2024-12-04	1669	M	Y
2024-11-03	4391378	649421	1987-08-08 08:15:00	Follow up US	Finalized	Present	2024-11-30	95	333.5	326.7	70.4	male	Jennifer Jenson MD	Natalie Serano, RDMS	2024-11-23	3240	M	Y
2024-11-03	4249285	1291585	1983-08-01 08:15:00	Comp Basic US	Finalized	Present	2025-01-22	67	257.7	244.5	49.5	male	William Wilson MD	Estefania Traun, RDMS	2024-12-27	2170	M	Y	2155
2024-11-03	4297498	1443416	1989-07-20 20:36:05	Follow up US	Finalized	Present	2024-12-27	82.8	288.9	282.9	66.4	female	Jennifer Jenson MD	Veronica Macias, RDMS	2024-12-14	3180	F	Y
2024-11-03	4442105	1813350	2001-07-16 20:16:24	Comp Detailed US	Finalized	Present	2024-12-28	78.2	284.6	275.9	58.2	female	Robbie Robertson DO	Veronica Macias, RDMS	2024-12-18	3185	F	Y
2024-11-04	4469599	110339	2005-11-24 18:19:41	Follow up US	Finalized	Present	2025-01-11	71.7	273.6	239.6	55.4	male	Jennifer Jenson MD	Estefania Traun, RDMS	2024-12-02	2580	M	Y
2024-11-04	4376399	553096	1988-08-21 01:28:35	Follow up US	Finalized	Present	2024-11-28	89.4	321	313.9	71.7		Jennifer Jenson MD	Prithi Dokania, RDMS	2024-11-05	2920	M	Y
2024-11-04	4357908	1182275	1986-03-01 18:26:43	Comp Detailed US	Finalized	Present	2025-03-31	43.8	171.5	135.9	31	female	Fred Fredriskson MD	Natalie Serano, RDMS	2025-03-28	3400	F	Y
2024-11-05	4431880	871536	2000-10-26 02:20:37	Follow up US	Revised	Present	2025-03-14	49.6	186.4	157.7	42.4		Fred Fredriskson MD	Vicky Martinez, RDMS	2025-02-22	3075	F	Y
2024-11-05	4407381	997475	1995-08-18 09:30:56	Comp Detailed US	Finalized	Present	2025-04-03	41	164.6	146.5	29.6	male	Jennifer Jenson MD	Veronica Macias, RDMS	2025-03-16	3190	M	Y
2024-11-05	4288891	1640312	1986-08-22 15:25:18	Fetal Echo	Finalized	Present	2025-03-12	50	193.7	168.1	36.1	female	Jennifer Jenson MD	Angelica Zunj, RDMS	2025-02-23	2565	F	Y
2024-11-06	4302145	354949	1989-07-29 22:14:31	Fetal Echo	Finalized	Present	2025-03-26	43.1	164.6	142.6	34.1	female	Andrea Anderson MD	Angelica Zunj, RDMS	2025-03-23	4080	F	Y
2024-11-06	4311574	377986	1987-01-10 12:54:50	Comp Detailed US	Finalized	Present	2025-03-30	43.7	170.6	151.8	28.2	male	Andrea Anderson MD	Apoorva Kota, RDMS	2025-03-27	3715	M	Y
2024-11-06	4288840	538465	1989-01-04 01:55:18	Comp Detailed US	Revised	Present	2025-03-26	41.6	168	140.3	34.8	male	Jennifer Jenson MD	Apoorva Kota, RDMS	2025-03-22	3370	M	Y
2024-11-06	4462932	1502951	1988-06-04 03:49:13	Follow up US	Finalized	Present	2025-02-26	57.3	217.5	197.9	42.3	female	Jennifer Jenson MD	Vicky Martinez, RDMS	2025-02-11	2680	F	Y
2024-11-07	4496078	245399	1981-06-11 20:58:35	Follow up US	Finalized	Present	2024-12-06	86.5	324.1	327.3	64.3	male	Jennifer Jenson MD	Estefania Traun, RDMS	2024-11-27	3180	M	Y
2024-11-07	4494192	576265	2002-06-29 20:29:03	Follow up US	Finalized	Present	2024-12-02	89	328.6	352.4	68.8	female	Andrea Anderson MD	Deepa Yow, RDMS	2025-11-30	2490	M	Y
2024-11-07	4474029	839951	1984-05-07 05:13:35	Comp Detailed US	Finalized	Present	2025-04-04	42.9	166.7	146.6	32.1	male	Jennifer Jenson MD	Vicky Martinez, RDMS	2025-03-29	3460	M	Y
2024-11-07	4425569	1126643	1982-02-11 17:37:30	Follow up US	Finalized	Present	2024-12-22	85	310.2	289.1	61.3		Fred Fredriskson MD	Apoorva Kota, RDMS	2024-12-25	3460	M	Y
2024-11-07	4390407	1304807	1979-04-04 11:38:54	Follow up US	Finalized	Present	2025-02-26	64.5	234.5	215.2	41.6		Fred Fredriskson MD	Prithi Dokania, RDMS	2025-02-21	3875	M	Y
2024-11-07	4383225	1463323	1993-09-09 21:26:43	Comp Detailed US	Finalized	Present	2025-04-10	45.2	163.2	135.5	28.8	female	Fred Fredriskson MD	Apoorva Kota, RDMS	2025-04-01	3420	F	Y
2024-11-07	4417945	1468521	1984-01-05 05:17:48	Follow up US	Finalized	Present	2024-11-20	91.1	335	322.7	72.6	male	Andrea Anderson MD	Veronica Macias, RDMS	2024-11-13	3230	M	Y
2024-11-07	4473876	1973426	1991-06-04 10:27:11	Comp Detailed US	Finalized	Present	2025-04-02	46.7	170.9	142.6	32	male	Andrea Anderson MD	Prithi Dokania, RDMS	2025-03-23	3660	M	Y
2024-11-07	4410849	1991752	1994-04-02 17:40:18	Comp Detailed US	Finalized	Present	2025-04-01	46.1	170	140.4	27.5	male	Fred Fredriskson MD	Vicky Martinez, RDMS	2025-04-03	3620	M	Y
2024-11-08	4253615	487200	1996-08-01 03:07:01	Follow up US	Finalized	Present	2025-03-14	52.6	197.7	173.8	39.7	female	Jennifer Jenson MD	Apoorva Kota, RDMS	2025-02-20	2790	F	Y
2024-11-08	4472501	579358	2004-04-09 05:40:18	Comp Detailed US	Finalized	Present	2025-03-05	52.1	199	175.9	42	female	William Wilson MD	Vicky Martinez, RDMS	2025-02-23	2975	F	Y
2024-11-08	4461963	740729	1987-01-06 12:14:03	Comp Basic US	Finalized	Present	2025-02-04	74.5	271.6	241.8	55	male	William Wilson MD	Veronica Macias, RDMS	2025-01-24	3830	M	Y
2024-11-08	4420789	887661	1996-02-07 07:06:05	Comp Detailed US	Finalized	Present	2025-04-04	46.7	169.2	149	29.5	male	Fred Fredriskson MD	Apoorva Kota, RDMS	2025-03-31	3690	M	Y
2024-11-08	4429643	1151440	1995-07-16 08:23:26	Follow up US	Finalized	Present	2024-11-29	89.4	334.3	316.9	75.1		William Wilson MD	Vicky Martinez, RDMS	2024-11-29	3130	M	Y
2024-11-08	4499139	1206954	1985-01-14 00:21:05	Follow up US	Finalized	Present	2025-02-23	63.4	233	222.5	46.4		Jennifer Jenson MD	Leticia Castro, RDMS	2025-02-01	3490	M	Y
2024-11-08	4439921	1709935	1989-07-11 21:02:48	Follow up US	Finalized	Present	2025-01-17	78.8	290.7	263.1	57.5	female	William Wilson MD	Prithi Dokania, RDMS	2025-01-14	3500	F	Y
2024-11-08	4404124	1954288	1978-06-01 15:52:44	Follow up US	Finalized	Present	2025-01-25	73.6	279.5	242.8	54.8	female	William Wilson MD	Estefania Traun, RDMS	2025-01-18	2670	F	Y
2024-11-09	4352545	132579	1988-05-08 04:04:41	Follow up US	Finalized	Present	2024-12-30	82.4	295.8	276.3	66.1	female	William Wilson MD	Prithi Dokania, RDMS	2024-12-16	3150	F	Y
2024-11-09	3893721	563457	2003-05-13 09:40:46	Follow up US	Finalized	Present	2024-12-11	88.3	318.8	321.1	67.5	male	William Wilson MD	Apoorva Kota, RDMS	2024-12-08	3400	M	Y
2024-11-09	4512208	905067	1989-07-01 20:17:48	Follow up US	Finalized	Present	2024-12-09	77.1	285.1	280.5	69.3		William Wilson MD	Prithi Dokania, RDMS	2024-11-20	2250	F	Y
2024-11-09	4509148	1099326	1992-09-30 00:33:45	Follow up US	Finalized	Present	2024-12-02	89.4	327.9	328	73.9		Jennifer Jenson MD	Deepa Yow, RDMS	2024-11-11	3200	M	Y
2024-11-09	4444442	1120559	2000-02-17 06:01:24	Comp Detailed US	Finalized	Present	2025-03-29	44.1	172.9	163	34.4	male	Fred Fredriskson MD	Estefania Traun, RDMS	2025-02-27	3100	M	Y
2024-11-10	4478617	1043150	1986-08-24 15:49:13	Comp Detailed US	Finalized	Present	2025-03-29	48.8	178.6	147.6	27.6	male	Jennifer Jenson MD	Vicky Martinez, RDMS	2025-03-23	3200	M	Y
2024-11-10	4485856	1685494	1991-07-13 09:46:24	Comp Detailed US	Finalized	Present	2025-02-09	64.2	245.4	223	55.8	female	William Wilson MD	Vicky Martinez, RDMS	2025-02-01	3485	F	Y
2024-11-12	4516793	1474441	1991-12-01 06:05:37	Follow up US	Finalized	Present	2025-01-09	73.5	281.6	265.6	59.6		Fred Fredriskson MD	Leticia Castro, RDMS	2024-12-15	2445	F	Y
2024-11-12	4502663	1633712	1996-08-06 02:48:45	Comp Basic US	Finalized	Present	2025-01-06	82.8	305.9	309.6	67.4	female	Fred Fredriskson MD	Apoorva Kota, RDMS	2024-12-29	3740	F	Y
2024-11-13	4465575	39985	1991-01-22 12:52:01	Comp Detailed US	Finalized	Present	2025-04-09	44.9	173.3	140.7	28.5	male	William Wilson MD	Apoorva Kota, RDMS	2025-04-06	3590	M	Y
2024-11-13	4407278	128362	1990-10-05 12:33:45	Follow up US	Finalized	Present	2025-01-04	75.3	298.7	297.5	65.5	female	Robbie Robertson DO	Estefania Traun, RDMS	2024-11-29	2280	F	Y
2024-11-13	4305104	470668	1996-09-20 03:40:46	Comp Detailed US	Finalized	Present	2025-04-07	43.4	168.3	147.9	29.7	female	Robbie Robertson DO	Natalie Serano, RDMS	2025-03-31	2880	F	Y
2024-11-13	4519391	480534	1993-08-04 19:53:54	Follow up US	Finalized	Present	2024-12-01	100.5	341.5	350.7	71.4	male	Robbie Robertson DO	Veronica Macias, RDMS	2024-11-18	3890	M	Y
2024-11-13	4521684	645982	1979-07-31 10:44:03	Comp Detailed US	Finalized	Present	2025-04-10	43.5	154.6	139.1	29.6	female	Robbie Robertson DO	Natalie Serano, RDMS	2025-04-03	3830	F	Y
2024-11-13	4389740	1236561	1985-01-03 01:17:20	Follow up US	Revised	Present	2025-03-06	57.6	220.3	191.1	44.7	female	Andrea Anderson MD	Veronica Macias, RDMS	2025-02-19	2395	F	Y
2024-11-13	4510987	1598840	1992-05-07 04:46:52	Comp Detailed US	Finalized	Present	2025-04-09	44.6	167.7	133.5	31.5	male	Fred Fredriskson MD	Estefania Traun, RDMS	2025-03-05	2755	M	Y
2024-11-14	4471176	355899	1978-03-10 18:04:55	Follow up US	Finalized	Present	2025-03-02	55.8	224.5	201.9	44.9	female	William Wilson MD	Natalie Serano, RDMS	2025-02-04	2885	F	Y
2024-11-14	4399635	557613	2001-08-06 21:29:31	Follow up US	Finalized	Present	2025-03-05	58.6	225.3	187.7	47.4	female	Andrea Anderson MD	Estefania Traun, RDMS	2025-02-15	2770	F	Y
2024-11-14	4477085	773399	1986-04-30 16:03:16	Comp Basic US	Finalized	Present	2025-01-12	83.2	297.8	288.6	61.7	female	Robbie Robertson DO	Vicky Martinez, RDMS	2024-12-17	2680	F	Y
2024-11-14	4521633	1875884	1994-09-05 15:35:09	Comp Detailed US	Finalized	Present	2025-04-06	43.8	176.2	149.2	29.5	male	Andrea Anderson MD	Vicky Martinez, RDMS	2025-04-01	4375	M	Y
2024-11-15	4425013	80342	1990-04-07 16:49:41	Follow up US	Finalized	Present	2025-02-01	70.7	262.8	244.7	50.1		Fred Fredriskson MD	Vicky Martinez, RDMS	2025-01-20	3160	M	Y
2024-11-15	4422312	548266	1983-12-29 05:58:35	Follow up US	Finalized	Present	2024-12-11	95.7	346.5	343.2	73.9		Fred Fredriskson MD	Apoorva Kota, RDMS	2024-11-29	3505	M	Y
2024-11-15	4416516	768638	1992-02-06 05:27:39	Follow up US	Finalized	Present	2025-01-10	76.9	292	273.3	63.4	male	Andrea Anderson MD	Angelica Zunj, RDMS	2024-12-31	3290	M	Y
2024-11-15	4448164	1026118	1983-08-08 07:34:13	Follow up US	Finalized	Present	2024-12-02	90.8	323.5	316.7	71.6		Fred Fredriskson MD	Natalie Serano, RDMS	2024-11-25	2860	F	Y
2024-11-15	4498423	1357885	1993-01-06 00:23:54	Comp Basic US	Finalized	Present	2025-01-24	77.1	276.4	256.1	57.2	male	Robbie Robertson DO	Deepa Yow, RDMS	2025-01-18	3020	M	Y
2024-11-15	4436357	1578045	1984-10-18 01:48:16	Follow up US	Finalized	Present	2025-01-14	81.4	308.9	281.4	60		Fred Fredriskson MD	Veronica Macias, RDMS	2025-01-13	3420	F	Y
2024-11-15	4523727	1891840	1990-11-29 14:36:05	Comp Detailed US	Finalized	Present	2025-04-14	40.6	146.2	134.4	29.9	male	William Wilson MD	Estefania Traun, RDMS	2025-03-31	2490	M	Y
2024-11-16	4433714	1179586	1997-03-24 22:25:46	Follow up US	Finalized	Present	2025-02-05	71.4	258.9	276.5	50.4		William Wilson MD	Deepa Yow, RDMS	2024-12-17	3295	F	Y
2024-11-16	3946438	1945587	1994-09-11 14:07:58	Follow up US	Finalized	Present	2025-01-09	80.3	301.1	291.2	60.1	female	William Wilson MD	Apoorva Kota, RDMS	2025-01-07	3430	F	Y
2024-11-17	4531292	217532	1988-04-10 05:17:48	Comp Detailed US	Finalized	Present	2025-04-07	48.9	171	139.8	34.9	male	Robbie Robertson DO	Estefania Traun, RDMS	2025-03-02	2200	M	Y
2024-11-17	4459110	636226	1987-10-03 08:03:45	Follow up US	Revised	Present	2025-02-05	74	260.6	242.4	52.4	male	William Wilson MD	Veronica Macias, RDMS	2025-01-30	3100	F	Y
2024-11-17	4531343	916386	1986-02-20 18:46:24	Comp Detailed US	Finalized	Present	2025-04-12	45.7	170.6	148.9	30.7	male	Robbie Robertson DO	Apoorva Kota, RDMS	2025-04-02	3240	M	Y
2024-11-17	4546895	968291	1981-11-16 19:57:25	Follow up US	Finalized	Present	2025-02-23	62.7	230.7	215.8	48		Fred Fredriskson MD	Leticia Castro, RDMS	2025-02-04	2925	F	Y
2024-11-18	4532254	91087	2000-01-22 07:42:39	Comp Detailed US	Finalized	Present	2025-04-07	44.2	165.1	151.1	35.1	unknown	William Wilson MD	Veronica Macias, RDMS	2025-04-09	4065	F	Y
2024-11-18	4532203	1645113	1991-06-04 11:19:13	Comp Detailed US	Finalized	Present	2025-04-21	43	153.5	122.3	30.5	female	Robbie Robertson DO	Estefania Traun, RDMS	2025-04-20	3900	F	Y
2024-11-18	4476421	1944225	1990-12-26 12:43:35	Comp Basic US	Finalized	Present	2025-01-18	76	278	264.7	60.9	female	William Wilson MD	Vicky Martinez, RDMS	2025-01-10	2450	F	Y
2024-11-19	4434777	527113	1995-10-16 07:38:26	Follow up US	Finalized	Present	2025-01-30	82.6	278	261.2	59.3		Fred Fredriskson MD	Veronica Macias, RDMS	2025-01-31	3430	F	Y
2024-11-20	4403464	337493	1991-01-18 12:14:03	Follow up US	Finalized	Present	2025-01-16	89.3	313.7	273.2	60.1	male	Robbie Robertson DO	Estefania Traun, RDMS	2025-01-10	3290	M	Y
2024-11-20	4352851	354774	1992-07-05 03:28:07	Follow up US	Finalized	Present	2025-01-14	79.8	297.8	275.1	62.1	female	Robbie Robertson DO	Veronica Macias, RDMS	2025-01-07	3440	F	Y
2024-11-20	4554947	364548	1990-02-23 16:39:50	Comp Basic US	Finalized	Present	2025-01-16	83.9	300.1	265.1	59		Robbie Robertson DO	Laura Gavva, RDMS	2024-12-14	2470	M	Y
2024-11-20	4497405	412674	1991-11-23 06:15:28	Follow up US	Finalized	Present	2024-12-19	91.1	324.5	316.1	72.2	male	Jennifer Jenson MD	Veronica Macias, RDMS	2024-12-12	3945	M	Y
2024-11-20	4527403	552402	1995-01-08 13:21:33	Comp Detailed US	Finalized	Present	2025-04-22	42.6	156.9	115.6	23.8	female	Fred Fredriskson MD	Prithi Dokania, RDMS	2025-04-03	2750	F	Y
2024-11-21	4549284	122937	1996-05-19 04:38:26	Comp Detailed US	Finalized	Present	2025-03-11	61.6	220.6	199.6	42.6	male	Jennifer Jenson MD	Natalie Serano, RDMS	2025-03-04	3070	M	Y
2024-11-21	4527044	245399	1981-07-06 20:58:35	Follow up US	Finalized	Present	2024-12-04	91.6	332.4	330.9	70.2	male	Jennifer Jenson MD	Prithi Dokania, RDMS	2024-11-29	3180	M	Y
2024-11-21	4555759	1452536	1992-05-29 03:40:46	Comp Detailed US	Finalized	Present	2025-01-05	86.8	309.3	279	60.2	male	Robbie Robertson DO	Angelica Zunj, RDMS	2025-01-04	3090	M	Y
2024-11-21	4553670	1670365	1990-07-18 14:54:22	Follow up US	Revised	Present	2025-03-27	54.2	196.7	170.3	42.5		Robbie Robertson DO	Natalie Serano, RDMS	2025-01-13	1725	M	Y
2024-11-21	4524339	1730436	1982-04-20 17:41:00	Comp Detailed US	Finalized	Present	2025-04-14	43.9	167.6	145.5	31.4	female	Fred Fredriskson MD	Veronica Macias, RDMS	2025-04-04	3425	F	Y
2024-11-22	4555861	107525	1994-01-12 19:28:35	Comp Detailed US	Finalized	Present	2025-04-28	38.2	140.3	115.3	24.2	female	Robbie Robertson DO	Apoorva Kota, RDMS	2025-04-03	2800	F	Y
2024-11-22	4562596	598963	1996-07-25 02:03:45	Follow up US	Finalized	Present	2025-01-29	78.4	283.7	240.5	58.6	male	Jennifer Jenson MD	Laura Gavva, RDMS	2024-12-04	1669	M	Y
2024-11-22	4546132	943879	1987-01-16 11:02:20	Follow up US	Finalized	Present	2024-12-06	89.3	330.8	346.4	69.8		Jennifer Jenson MD	Prithi Dokania, RDMS	2024-12-07	3680	F	Y
2024-11-22	4530780	1460249	2001-04-19 23:54:22	Follow up US	Revised	Present	2025-03-28	53.7	192.2	171.9	36.2	female	Jennifer Jenson MD	Prithi Dokania, RDMS	2025-03-30	3530	F	Y
2024-11-25	4569263	810627	2007-06-01 08:29:03	Comp Basic US	Finalized	Present	2025-01-08	88.2	307	253.9	67.8	female	Jennifer Jenson MD	Matthea Gregorio, RDMS	2024-11-23	2350	F	Y
2024-11-26	4451620	155269	1991-06-22 09:53:26	Follow up US	Revised	Present	2025-03-07	63.5	235.9	212.1	49.8		Fred Fredriskson MD	Angelica Zunj, RDMS	2025-02-22	3055	F	Y
2024-11-26	4339290	534255	1996-06-29 05:26:15	Comp Detailed US	Revised	Present	2025-04-19	43	166.1	143.3	29.9	male	Fred Fredriskson MD	Apoorva Kota, RDMS	2025-04-25	3610	M	Y
2024-11-26	4555912	1412988	1987-11-04 08:55:46	Comp Detailed US	Finalized	Present	2025-04-18	42.2	162	141.2	30.2	male	Fred Fredriskson MD	Vicky Martinez, RDMS	2025-03-24	2440	M	Y
2024-11-26	4334750	1420948	1984-08-19 04:01:52	Comp Detailed US	Revised	Present	2025-04-18	45.7	163.6	132.5	32.1	female	Andrea Anderson MD	Estefania Traun, RDMS	2025-04-19	3780	F	Y
2024-11-27	4572010	128362	1990-11-02 12:33:45	Follow up US	Revised	Present	2025-01-03	83.5	309.4	303.5	65.4	female	Jennifer Jenson MD	Juana Manadeva, RDMS	2024-11-29	2280	F	Y
2024-11-27	4455850	968291	1981-09-29 19:57:25	Follow up US	Revised	Present	2025-02-25	67.8	250.2	231.9	51.7		William Wilson MD	Angelica Zunj, RDMS	2025-02-03	2925	F	Y
2024-11-27	4525818	1120559	2000-02-04 06:01:24	Follow up US	Finalized	Present	2025-03-27	52.8	208.5	192.6	40.4	male	Andrea Anderson MD	Prithi Dokania, RDMS	2025-03-01	3100	M	Y
2024-11-27	4575721	1443416	1989-08-11 20:36:05	Follow up US	Finalized	Present	2024-12-25	87.8	314.1	319.6	68.3		Andrea Anderson MD	Apoorva Kota, RDMS	2024-12-12	3180	F	Y
2024-11-28	4394182	53953	1992-11-26 02:19:13	Comp Detailed US	Finalized	Present	2025-04-19	46.8	165.2	143.2	29.6	male	Jennifer Jenson MD	Vicky Martinez, RDMS	2025-04-13	3220	M	Y
2024-11-28	4445719	274108	1989-05-10 23:12:11	Follow up US	Finalized	Present	2025-03-23	57.7	222.2	200.8	45.5	female	William Wilson MD	Vicky Martinez, RDMS	2025-03-04	3190	F	Y
2024-11-28	4571705	538465	1988-11-28 01:55:18	Follow up US	Finalized	Present	2025-03-27	48.7	199.8	172.7	38.9		William Wilson MD	Veronica Macias, RDMS	2025-03-23	3370	M	Y
2024-11-28	4452741	892424	1991-10-21 06:36:33	Follow up US	Finalized	Present	2024-12-20	89.2	323	318.7	72.6		Jennifer Jenson MD	Natalie Serano, RDMS	2024-12-12	3155	F	Y
2024-11-28	4509403	1159777	1977-12-13 19:46:52	Comp Detailed US	Finalized	Present	2025-04-26	47	170.2	150.5	29.8	male	William Wilson MD	Deepa Yow, RDMS	2025-04-14	4040	M	Y
2024-11-28	4573385	1162954	1993-01-08 01:49:41	Comp Detailed US	Finalized	Present	2025-04-21	41.6	158.7	135.5	27	female	William Wilson MD	Apoorva Kota, RDMS	2025-03-29	2560	F	Y
2024-11-28	3998576	1270383	1992-05-29 03:59:03	Follow up US	Finalized	Present	2025-01-17	85.9	295	295.6	67	male	Andrea Anderson MD	Vicky Martinez, RDMS	2025-01-17	3690	M	Y
2024-11-28	4369823	1683295	1988-09-11 04:11:43	Comp Detailed US	Finalized	Present	2025-04-23	45.9	165.2	150.1	27	male	Andrea Anderson MD	Natalie Serano, RDMS	2025-04-16	3105	M	Y
2024-11-28	4565090	1905678	1991-03-29 10:20:09	Follow up US	Revised	Present	2024-12-15	95.3	344.4	358.3	73.9		Andrea Anderson MD	Angelica Zunj, RDMS	2024-12-10	3800	F	Y
2024-11-28	4492002	1991752	1994-05-05 17:40:18	Follow up US	Finalized	Present	2025-03-31	53.2	206.1	187.2	37.9	male	Jennifer Jenson MD	Apoorva Kota, RDMS	2025-04-01	3620	M	Y
2024-11-29	4580659	110339	2005-10-30 18:19:41	Follow up US	Finalized	Present	2025-01-11	81	303	284	61.8		Andrea Anderson MD	Leticia Castro, RDMS	2024-12-01	2580	M	Y
2024-11-29	4460945	146785	1992-03-06 06:32:20	Comp Detailed US	Finalized	Present	2025-04-25	44.7	157.3	142.3	26.7	male	Jennifer Jenson MD	Natalie Serano, RDMS	2025-04-20	3345	M	Y
2024-11-29	4512311	305452	1989-11-06 20:55:46	Comp Detailed US	Finalized	Present	2025-04-25	44.8	162.7	135.8	32.9	female	Robbie Robertson DO	Natalie Serano, RDMS	2025-04-20	3020	F	Y
2024-11-29	4476983	347364	1989-11-15 19:27:11	Follow up US	Finalized	Present	2025-03-03	65.9	252.3	248.4	51.3	male	Jennifer Jenson MD	Veronica Macias, RDMS	2025-02-17	4010	M	Y
2024-11-29	4482642	377986	1987-01-13 12:54:50	Fetal Echo	Finalized	Present	2025-03-30	55.9	209.3	181.5	38.5	male	Jennifer Jenson MD	Vicky Martinez, RDMS	2025-03-28	3715	M	Y
2024-11-29	4588030	484572	1992-12-19 01:28:35	Follow up US	Revised	Present	2025-02-17	74.5	273.2	248.2	58.2	male	Robbie Robertson DO	Prithi Dokania, RDMS	2025-02-16	3800	M	Y
2024-11-29	4471378	707329	1994-06-09 15:37:58	Follow up US	Finalized	Present	2024-12-26	83.6	321.8	328.5	74	male	William Wilson MD	Vicky Martinez, RDMS	2024-12-31	3745	M	Y
2024-11-29	4538540	711422	1989-12-14 18:35:09	Follow up US	Revised	Present	2024-12-21	88.4	323.4	328.4	68		Jennifer Jenson MD	Prithi Dokania, RDMS	2024-12-18	3160	M	Y
2024-11-29	4470972	1146100	1985-04-05 22:27:11	Comp Basic US	Finalized	Present	2025-01-25	83.7	305.8	296.5	64.5	female	Jennifer Jenson MD	Angelica Zunj, RDMS	2024-12-30	3170	F	Y
2024-11-29	4447450	1260451	1996-03-27 06:08:26	Comp Detailed US	Revised	Present	2025-04-09	51.6	192.8	174.2	37.1	female	Robbie Robertson DO	Angelica Zunj, RDMS	2025-03-27	3240	F	Y
2024-11-29	4428980	1692880	1993-11-28 18:29:31	Comp Basic US	Revised	Present	2025-01-25	83	285.9	242.3	60.5	female	Robbie Robertson DO	Apoorva Kota, RDMS	2025-01-05	1850	F	Y
2024-11-30	4310860	102803	1993-11-24 18:54:50	Follow up US	Revised	Present	2025-02-09	73.3	286.5	271	56		Fred Fredriskson MD	Natalie Serano, RDMS	2025-01-31	2910	M	Y
2024-11-30	4474589	124785	1981-08-19 21:05:37	Follow up US	Finalized	Present	2025-03-24	53.2	212	188.8	37	male	William Wilson MD	Apoorva Kota, RDMS	2025-02-28	2900	M	Y
2024-11-30	4484627	346690	1995-07-26 08:05:09	Follow up US	Finalized	Present	2024-12-11	97.4	340.7	332	74.1		William Wilson MD	Vicky Martinez, RDMS	2024-12-08	3420	F	Y
2024-11-30	4490009	514186	1996-10-15 03:35:09	Comp Detailed US	Finalized	Present	2025-04-23	46	174.8	134.6	31.8	male	Jennifer Jenson MD	Apoorva Kota, RDMS	2025-04-16	3285	M	Y
2024-11-30	4490625	548937	1999-03-13 12:29:31	Comp Detailed US	Finalized	Present	2025-04-26	47.1	164.8	154.2	30.9	female	William Wilson MD	Apoorva Kota, RDMS	2025-04-20	3240	F	Y
2024-11-30	4531648	705466	1986-12-17 14:12:11	Comp Detailed US	Finalized	Present	2025-05-06	38.9	142.2	125.8	28.7	female	Robbie Robertson DO	Apoorva Kota, RDMS	2025-04-13	2855	F	Y
2024-11-30	4448979	921010	1990-09-11 15:30:56	Follow up US	Finalized	Present	2025-03-21	56.6	217.7	210.8	41.8	female	William Wilson MD	Estefania Traun, RDMS	2025-03-19	3190	F	Y
2024-11-30	4309843	1013354	1992-01-24 05:58:35	Follow up US	Finalized	Present	2025-02-07	76.6	279.8	274.4	60.9		Fred Fredriskson MD	Estefania Traun, RDMS	2025-02-01	4090	F	Y
2024-11-30	4606041	1112212	1990-09-18 13:55:18	Comp Basic US	Finalized	Present	2025-03-19	58	221.5	186.3	44.9		Andrea Anderson MD	Matthea Gregorio, RDMS	2025-01-24	1480	M	Y
2024-11-30	4372273	1158841	1996-09-21 02:58:35	Comp Detailed US	Finalized	Present	2025-04-22	41.1	159	127.7	31.5	female	Jennifer Jenson MD	Veronica Macias, RDMS	2025-04-12	2660	F	Y
2024-11-30	4254685	1197335	1992-03-21 04:39:50	Follow up US	Finalized	Present	2025-01-27	72.8	276.2	266.5	64.6	female	Jennifer Jenson MD	Vicky Martinez, RDMS	2025-01-21	3360	F	Y
2024-11-30	4477599	1424717	1996-03-03 06:00:00	Comp Detailed US	Finalized	Present	2025-04-15	46.6	182.6	173.8	32.7	male	William Wilson MD	Veronica Macias, RDMS	2025-03-24	2935	M	Y
2024-11-30	4326879	1553089	1992-02-22 06:22:30	Fetal Echo	Finalized	Present	2025-03-29	59.6	204	177.1	41		Robbie Robertson DO	Vicky Martinez, RDMS	2025-03-25	4000	M	Y
2024-11-30	4451825	1668898	1988-10-28 01:11:43	Comp Basic US	Finalized	Present	2025-01-13	87.7	319.8	307.9	64		Jennifer Jenson MD	Apoorva Kota, RDMS	2025-01-04	3310	F	Y
2024-11-30	4571348	1954288	1978-06-03 15:52:44	Follow up US	Finalized	Present	2025-01-25	82.6	296	274.5	60.6	female	William Wilson MD	Angelica Zunj, RDMS	2025-01-18	2670	F	Y
2024-12-01	4478412	199222	1995-11-10 06:47:48	Follow up US	Finalized	Present	2024-12-27	87.7	325.2	346.7	70.6	female	Jennifer Jenson MD	Veronica Macias, RDMS	2024-12-20	3810	F	Y
2024-12-01	4594276	213723	1986-11-07 12:47:48	Follow up US	Finalized	Present	2025-01-06	88.4	324.2	314.4	69		Robbie Robertson DO	Kaila Limanjaya, RDMS	2024-12-02	2395	M	Y
2024-12-01	4599316	1291585	1983-08-06 08:15:00	Comp Basic US	Finalized	Present	2025-01-22	76.6	287.8	260.7	54.2	male	Jennifer Jenson MD	Matthea Gregorio, RDMS	2024-12-26	2170	M	Y
2024-12-01	4425671	1855651	2000-07-07 03:19:41	Follow up US	Finalized	Present	2025-02-24	69.2	253.5	235.2	51	female	Robbie Robertson DO	Apoorva Kota, RDMS	2025-01-14	2190	F	Y
2024-12-01	4478463	1878607	1994-04-16 17:31:52	Follow up US	Finalized	Present	2025-02-19	72.5	260.5	246.9	52.9		Jennifer Jenson MD	Vicky Martinez, RDMS	2025-02-17	3670	M	Y
2024-12-02	4447705	1068250	1989-07-28 22:21:33	Comp Detailed US	Finalized	Present	2025-04-16	50	179.1	163	31.6	female	William Wilson MD	Apoorva Kota, RDMS	2025-04-04	3670	F	Y
2024-12-03	4585845	490341	1989-01-19 00:09:50	Follow up US	Finalized	Present	2025-01-20	81.2	308.5	280.7	60.6	female	Andrea Anderson MD	Natalie Serano, RDMS	2025-01-04	2530	F	Y
2024-12-03	4465982	977532	1988-01-31 05:51:33	Follow up US	Finalized	Present	2024-12-24	94.7	331.4	317.5	70	male	Fred Fredriskson MD	Veronica Macias, RDMS	2024-12-19	2950	M	Y
2024-12-04	4349747	534552	1988-03-15 05:34:41	Fetal Echo	Finalized	Present	2025-03-28	59.5	213.3	186.6	41.6	female	Andrea Anderson MD	Vicky Martinez, RDMS	2025-03-05	2410	F	Y
2024-12-04	4494701	839951	1984-06-11 05:13:35	Follow up US	Finalized	Present	2025-04-04	55.4	215.8	196.7	43.2		Andrea Anderson MD	Vicky Martinez, RDMS	2025-03-30	3460	M	Y
2024-12-04	4573282	865737	1990-01-20 19:44:03	Comp Detailed US	Finalized	Present	2025-05-01	45.5	165.6	138	31.8	male	Jennifer Jenson MD	Deepa Yow, RDMS	2025-04-12	3840	M	Y
2024-12-04	4543740	1200708	1989-11-06 20:24:50	Comp Detailed US	Revised	Present	2025-04-22	46	168.2	146.5	37.7	female	Fred Fredriskson MD	Natalie Serano, RDMS	2025-04-12	3095	F	Y
2024-12-05	4571144	132579	1988-05-02 04:04:41	Follow up US	Finalized	Present	2025-01-01	91.9	326.1	325.2	69.6	female	William Wilson MD	Apoorva Kota, RDMS	2024-12-17	3150	F	Y
2024-12-05	4302247	354949	1989-08-04 22:14:31	Follow up US	Finalized	Present	2025-03-26	57	225.7	195	40.2	female	Andrea Anderson MD	Natalie Serano, RDMS	2025-03-22	4080	F	Y
2024-12-05	4373243	720175	1989-09-29 21:07:01	Comp Detailed US	Finalized	Present	2025-04-26	43	159.6	143.2	33.9	female	Jennifer Jenson MD	Natalie Serano, RDMS	2025-03-20	2210	F	Y
2024-12-05	4489958	1126643	1982-02-11 17:37:30	Follow up US	Finalized	Present	2024-12-23	94.4	335.7	336.9	68.5		Andrea Anderson MD	Estefania Traun, RDMS	2024-12-27	3460	M	Y
2024-12-05	4620488	1243424	1993-04-18 00:04:13	Comp Detailed US	Finalized	Present	2025-04-29	44.6	165.7	137.6	33.4	male	William Wilson MD	Estefania Traun, RDMS	2025-03-25	2545	M	Y
2024-12-05	4390458	1304807	1979-03-06 11:38:54	Follow up US	Finalized	Present	2025-02-28	76.4	279.6	242.4	53.3		Fred Fredriskson MD	Vicky Martinez, RDMS	2025-02-21	3875	M	Y
2024-12-05	4271130	1310295	1986-06-13 16:22:58	Comp Detailed US	Revised	Present	2025-04-29	44.8	158.7	143.5	28.9	female	Andrea Anderson MD	Deepa Yow, RDMS	2025-03-26	1770	F	Y
2024-12-05	4498169	1502951	1988-07-12 03:49:13	Follow up US	Finalized	Present	2025-02-28	71.1	262.1	223.9	52.4	female	Andrea Anderson MD	Veronica Macias, RDMS	2025-02-11	2680	F	Y
2024-12-05	4548115	1640312	1986-08-17 15:25:18	Follow up US	Finalized	Present	2025-03-11	64.3	240.1	221	51.3	female	Andrea Anderson MD	Prithi Dokania, RDMS	2025-02-22	2565	F	Y
2024-12-05	4275352	1685457	1991-04-13 10:37:01	Comp Basic US	Finalized	Present	2025-01-26	79.9	298.4	272.4	57.3	female	Jennifer Jenson MD	Deepa Yow, RDMS	2025-01-20	2680	F	Y
2024-12-05	4615864	1945587	1994-08-28 14:07:58	Follow up US	Finalized	Present	2025-01-10	92.3	312.8	314.4	64.5		Fred Fredriskson MD	Apoorva Kota, RDMS	2025-01-07	3430	F	Y
2024-12-06	4568758	312429	1989-02-28 00:07:01	Comp Basic US	Finalized	Present	2025-02-15	70	252.1	255.3	57.9	female	Jennifer Jenson MD	Prithi Dokania, RDMS	2025-01-28	2890	F	Y
2024-12-06	4627713	343738	1993-09-03 21:45:00	Comp Detailed US	Finalized	Present	2025-04-28	47.1	162.8	144.1	30.5	female	Jennifer Jenson MD	Apoorva Kota, RDMS	2025-05-02	4220	F	Y
2024-12-06	4559992	468884	1999-12-13 07:22:58	Comp Detailed US	Finalized	Present	2025-04-27	49.7	175.4	153.3	31.1	male	William Wilson MD	Estefania Traun, RDMS	2025-02-15	1525	M	Y
2024-12-06	4501646	487200	1996-09-06 03:07:01	Follow up US	Finalized	Present	2025-03-15	60.3	239.9	213.2	51.6		Fred Fredriskson MD	Natalie Serano, RDMS	2025-02-22	2790	F	Y
2024-12-06	4502103	563457	2003-04-29 09:40:46	Follow up US	Finalized	Present	2024-12-11	91.1	340.5	359.4	71.6	male	Jennifer Jenson MD	Estefania Traun, RDMS	2024-12-06	3400	M	Y
2024-12-06	4631435	740729	1987-01-18 12:14:03	Follow up US	Finalized	Present	2025-02-04	85.7	309	294.1	63.9	male	William Wilson MD	Apoorva Kota, RDMS	2025-01-24	3830	M	Y
2024-12-06	4498730	1677642	1994-12-12 12:57:39	Follow up US	Revised	Present	2025-02-26	71.7	263.6	231.4	50.3		Fred Fredriskson MD	Veronica Macias, RDMS	2025-02-04	2410	M	Y
2024-12-07	4627000	3443	1984-11-23 01:59:31	Follow up US	Revised	Absent	2025-02-28	74.6	272.5	270.7	52.6		Jennifer Jenson MD	Apoorva Kota, RDMS	2025-02-19	410	M	N
2024-12-07	4626592	143191	1990-07-30 15:45:00	Follow up US	Finalized	Present	2025-02-18	70.7	276.3	246.5	55.4	female	Jennifer Jenson MD	Prithi Dokania, RDMS	2025-02-26	3710	F	Y
2024-12-07	4500009	619526	1986-04-25 16:42:39	Follow up US	Finalized	Present	2025-01-28	84.6	294.4	273.3	64.5	male	Fred Fredriskson MD	Veronica Macias, RDMS	2025-01-26	3020	M	Y
2024-12-07	4626898	887661	1996-01-25 07:06:05	Follow up US	Finalized	Present	2025-04-04	58	210.4	190.8	42.2		Jennifer Jenson MD	Vicky Martinez, RDMS	2025-03-31	3690	M	Y
2024-12-07	4577908	1369608	1989-02-04 23:43:07	Follow up US	Finalized	Present	2025-02-01	84.7	303.4	269.4	61.2	male	William Wilson MD	Prithi Dokania, RDMS	2025-01-31	3610	M	Y
2024-12-08	4627255	46773	1988-01-24 06:32:20	Follow up US	Finalized	Present	2025-03-22	63.9	235.8	216.6	48.5	female	Jennifer Jenson MD	Natalie Serano, RDMS	2025-03-14	3070	F	Y
2024-12-08	4445668	482758	1986-09-15 15:04:13	Follow up US	Finalized	Present	2025-02-28	78.2	275.7	251.1	52.7		Jennifer Jenson MD	Apoorva Kota, RDMS	2025-03-02	4080	M	Y
2024-12-08	4647013	748551	1995-06-20 09:04:13	Comp Basic US	Finalized	Present	2025-03-16	62.9	244.7	229.6	50		William Wilson MD	Kaila Limanjaya, RDMS	2024-12-19	1210	M	Y
2024-12-08	4644497	836018	1980-11-18 03:07:44	Comp Detailed US	Finalized	Present	2025-05-05	48.3	165.7	127.7	31.3	male	Jennifer Jenson MD	Estefania Traun, RDMS	2025-05-01	3540	M	Y
2024-12-08	4647062	1670365	1990-07-30 14:54:22	Follow up US	Finalized	Present	2025-03-25	64.8	242.7	214.4	48.6		William Wilson MD	Kaila Limanjaya, RDMS	2025-01-12	1725	M	Y
2024-12-09	4632305	1091247	1989-06-07 22:58:07	Comp Detailed US	Finalized	Present	2025-04-21	50.9	175.7	168.4	34	female	Jennifer Jenson MD	Vicky Martinez, RDMS	2025-04-14	3590	F	Y
2024-12-10	4648337	100249	2002-10-17 13:34:13	Follow up US	Finalized	Present	2025-02-03	87.4	298.7	288.8	62.6		Andrea Anderson MD	Vicky Martinez, RDMS	2025-01-12	2930	F	Y
2024-12-10	4648439	557613	2001-06-27 21:29:31	Follow up US	Finalized	Present	2025-03-04	71.2	264.8	229.9	54.7	female	Robbie Robertson DO	Apoorva Kota, RDMS	2025-02-14	2770	F	Y
2024-12-10	4648388	773399	1986-05-12 16:03:16	Follow up US	Finalized	Present	2025-01-14	90.5	310.7	315.6	67		Fred Fredriskson MD	Veronica Macias, RDMS	2024-12-16	2680	F	Y
2024-12-11	4533630	276585	1994-06-08 17:12:11	Comp Detailed US	Revised	Present	2025-05-05	47.5	169.9	144.6	33.4	male	Andrea Anderson MD	Angelica Zunj, RDMS	2025-04-25	3120	M	Y
2024-12-11	4640980	744789	1994-12-17 13:35:37	Comp Detailed US	Revised	Present	2025-04-15	59.8	205.7	201.4	42.9	female	William Wilson MD	Deepa Yow, RDMS	2025-04-11	4030	F	Y
2024-12-11	4649153	1279001	1990-08-08 16:42:39	Comp Detailed US	Finalized	Present	2025-05-04	43.6	163.3	130.8	35.7	uncertain	Robbie Robertson DO	Veronica Macias, RDMS	2025-04-27	2850	F	Y
2024-12-12	4661837	213435	1990-01-19 17:17:48	Comp Basic US	Finalized	Present	2025-03-27	58.4	223.7	193.5	45		Robbie Robertson DO	Matthea Gregorio, RDMS	2024-12-14	788	M	Y
2024-12-12	4649663	340441	1990-10-03 14:52:58	Comp Detailed US	Finalized	Present	2025-05-06	45.3	166.1	142.2	30.6	uncertain	Andrea Anderson MD	Vicky Martinez, RDMS	2025-04-07	2435	M	Y
2024-12-12	4668453	597528	1995-01-04 14:00:56	Comp Detailed US	Finalized	Present	2025-04-27	44.7	161.6	140.4	30.5	female	William Wilson MD	Angelica Zunj, RDMS	2025-05-05	3530	F	Y
2024-12-12	4603900	636226	1987-10-16 08:03:45	Comp Basic US	Revised	Present	2025-02-03	77	281.2	281.1	60.3	male	Robbie Robertson DO	Veronica Macias, RDMS	2025-01-30	3100	F	Y
2024-12-12	4652460	768638	1992-01-20 05:27:39	Follow up US	Revised	Present	2025-01-08	82.7	328.2	323	66.7		Fred Fredriskson MD	Angelica Zunj, RDMS	2024-12-31	3290	M	Y
2024-12-13	4660309	80342	1990-03-17 16:49:41	Follow up US	Finalized	Present	2025-02-02	86.6	301.2	284.2	61.9		Andrea Anderson MD	Vicky Martinez, RDMS	2025-01-20	3160	M	Y
2024-12-13	4487145	403891	1994-04-05 18:21:05	Comp Detailed US	Finalized	Present	2025-04-29	45.9	175.9	167.5	31.4	female	Fred Fredriskson MD	Apoorva Kota, RDMS	2025-04-24	3460	F	Y
2024-12-13	4545117	538060	1991-02-22 13:38:26	Comp Detailed US	Finalized	Present	2025-05-08	44.6	165.9	139.8	31.6	male	Fred Fredriskson MD	Estefania Traun, RDMS	2025-05-01	3675	M	Y
2024-12-13	4654190	1070177	1981-09-13 20:25:32	Follow up US	Revised	Present	2025-02-26	69.9	261.7	245	58.7		Fred Fredriskson MD	Estefania Traun, RDMS	2025-02-23	3195	F	Y
2024-12-13	4655568	1357885	1992-12-07 00:23:54	Follow up US	Finalized	Present	2025-01-24	86.5	315	305.7	68.5	male	William Wilson MD	Apoorva Kota, RDMS	2025-01-17	3020	M	Y	3085
2024-12-14	4664080	107525	1994-01-31 19:28:35	Follow up US	Revised	Present	2025-04-27	46.4	173.4	150.7	35.2	female	Fred Fredriskson MD	Estefania Traun, RDMS	2025-04-04	2800	F	Y
2024-12-14	4537668	117333	1993-09-02 22:34:13	Comp Detailed US	Finalized	Present	2025-05-09	42	163	134.7	28.9	male	Robbie Robertson DO	Apoorva Kota, RDMS	2025-05-05	3980	M	Y
2024-12-14	4652511	234387	1997-08-25 20:54:22	Follow up US	Finalized	Present	2025-03-17	72.4	261.3	233	51.8		Fred Fredriskson MD	Vicky Martinez, RDMS	2025-03-12	3720	M	Y
2024-12-14	4653528	355899	1978-02-03 18:04:55	Follow up US	Finalized	Present	2025-03-04	74.1	259.7	257.1	53.6	female	Fred Fredriskson MD	Apoorva Kota, RDMS	2025-02-04	2885	F	Y
2024-12-14	4655874	485933	1992-01-15 06:39:22	Follow up US	Finalized	Present	2025-02-09	80.1	294.8	273.5	65.3		Fred Fredriskson MD	Veronica Macias, RDMS	2025-01-21	2640	M	Y
2024-12-14	4655619	916386	1986-01-27 18:46:24	Follow up US	Finalized	Present	2025-04-13	60.4	221.4	189	42.6		Fred Fredriskson MD	Natalie Serano, RDMS	2025-04-01	3240	M	Y
2024-12-14	4655823	1253519	1986-08-18 15:11:15	Follow up US	Finalized	Present	2025-03-14	66.2	254.9	234.8	51.1		Fred Fredriskson MD	Prithi Dokania, RDMS	2025-03-09	3970	F	Y
2024-12-14	4655313	1319667	1993-01-30 00:26:43	Comp Basic US	Finalized	Present	2025-02-07	77.4	291.3	261.9	56.1	male	Robbie Robertson DO	Estefania Traun, RDMS	2025-02-02	2950	M	Y
2024-12-14	4656487	1944225	1990-11-14 12:43:35	Follow up US	Finalized	Present	2025-01-18	82.7	313.2	305.9	63.7	female	William Wilson MD	Apoorva Kota, RDMS	2025-01-10	2450	F	Y
2024-12-15	4513943	145893	1989-06-20 23:15:00	Comp Detailed US	Finalized	Present	2025-05-13	43.6	166.9	142.6	28.6	male	Robbie Robertson DO	Natalie Serano, RDMS	2025-05-08	3830	M	Y
2024-12-15	4698966	160791	1992-03-26 07:03:16	Comp Detailed US	Finalized	Present	2025-05-06	48.5	177.7	153.9	33.9	female	Robbie Robertson DO	Prithi Dokania, RDMS	2025-05-01	3260	F	Y
2024-12-15	4692352	487200	1996-09-14 03:07:01	Limited US	Finalized	Present	2025-03-14	66	253.1	234.8	49.5		Fred Fredriskson MD	Juana Manadeva, RDMS	2025-02-21	2790	F	Y
2024-12-15	4655517	1578045	1984-09-12 01:48:16	Follow up US	Finalized	Present	2025-01-13	85.7	326.2	301.6	68.4		William Wilson MD	Veronica Macias, RDMS	2025-01-14	3420	F	Y
2024-12-15	4669264	1973426	1991-08-05 10:27:11	Follow up US	Finalized	Present	2025-04-03	64.9	231	218.4	45.9	male	Robbie Robertson DO	Apoorva Kota, RDMS	2025-03-25	3660	M	Y
2024-12-16	4610212	108049	1977-09-24 20:45:56	Follow up US	Finalized	Present	2025-03-17	69.2	253.8	228.3	44.5	female	Robbie Robertson DO	Veronica Macias, RDMS	2025-02-19	3090	F	Y
2024-12-16	4656538	461930	1984-10-19 02:06:33	Follow up US	Finalized	Present	2025-02-08	81.1	289.4	270.6	62.3	male	William Wilson MD	Veronica Macias, RDMS	2025-02-08	3230	M	Y
2024-12-18	4659649	1625671	1993-09-20 21:40:46	Comp Detailed US	Finalized	Present	2025-05-06	44.1	165	148.4	26.5		Robbie Robertson DO	Veronica Macias, RDMS	2025-04-19	1930	M	Y
2024-12-19	4706859	968291	1981-11-12 19:57:25	Follow up US	Finalized	Present	2025-02-25	78.5	279.3	266.3	60.6		Jennifer Jenson MD	Angelica Zunj, RDMS	2025-02-04	2925	F	Y
2024-12-19	4582342	1146100	1985-03-13 22:27:11	Follow up US	Finalized	Present	2025-01-24	89.9	323.1	334.1	69.5	female	Robbie Robertson DO	Apoorva Kota, RDMS	2024-12-28	3170	F	Y
2024-12-19	4665096	1214777	1978-07-01 16:33:30	Follow up US	Finalized	Present	2025-03-08	73.2	265.4	241.5	51.6	female	Robbie Robertson DO	Apoorva Kota, RDMS	2025-03-02	2280	F	Y
2024-12-19	4677672	1248512	1989-06-18 23:57:11	Comp Detailed US	Finalized	Present	2025-05-15	47.4	172.2	152.8	31.2	male	Fred Fredriskson MD	Vicky Martinez, RDMS	2025-05-15	4530	M	Y
2024-12-19	4704211	1326604	1992-02-21 06:05:37	Follow up US	Finalized	Present	2025-03-09	71.9	268.9	238.4	52.3	male	Robbie Robertson DO	Prithi Dokania, RDMS	2025-02-15	2530	M	Y
2024-12-19	4599720	1355795	1994-01-27 20:09:22	Comp Detailed US	Revised	Present	2025-05-21	44.7	164.5	137.4	31.2	male	Jennifer Jenson MD	Vicky Martinez, RDMS	2025-05-13	3310	M	Y
2024-12-19	4666371	1452536	1992-06-24 03:40:46	Follow up US	Finalized	Present	2025-01-04	88	328.9	317.9	67.4	male	Jennifer Jenson MD	Prithi Dokania, RDMS	2025-01-04	3090	M	Y
2024-12-19	4665708	1633712	1996-07-26 02:48:45	Follow up US	Finalized	Present	2025-01-07	94.6	330.8	353.5	76.5		Fred Fredriskson MD	Prithi Dokania, RDMS	2024-12-28	3740	F	Y
2024-12-19	4713823	1668898	1988-11-17 01:11:43	Follow up US	Finalized	Present	2025-01-12	89.2	329.9	331.2	79.5		Robbie Robertson DO	Vicky Martinez, RDMS	2025-01-02	3310	F	Y
2024-12-19	4719841	1746839	1998-06-10 17:36:05	Comp Detailed US	Finalized	Present	2025-05-12	45.1	173.4	162.8	32.7	female	Robbie Robertson DO	Prithi Dokania, RDMS	2025-05-04	3070	F	Y
2024-12-19	4673388	1972629	1991-06-03 10:10:18	Follow up US	Finalized	Present	2025-02-13	85.7	298.2	283.8	61.8	female	Robbie Robertson DO	Angelica Zunj, RDMS	2025-02-16	3630	F	Y
2024-12-19	4666116	1984979	1994-01-25 18:33:45	Follow up US	Finalized	Present	2025-02-12	82.5	287.4	262	61	male	Robbie Robertson DO	Vicky Martinez, RDMS	2025-02-07	3250	M	Y
2024-12-20	4699475	107525	1994-01-15 19:28:35	Follow up US	Finalized	Present	2025-04-27	51.7	188.5	164.3	34.2	female	Fred Fredriskson MD	Natalie Serano, RDMS	2025-04-03	2800	F	Y
2024-12-20	4673949	125852	1993-07-27 20:55:46	Follow up US	Finalized	Present	2025-02-16	82.2	294.1	292.7	59	female	Robbie Robertson DO	Natalie Serano, RDMS	2025-02-09	3470	F	Y
2024-12-20	4709955	1024125	1996-10-09 02:07:58	Comp Basic US	Finalized	Present	2025-03-19	62.2	240.6	205.4	49.8	female	Robbie Robertson DO	Veronica Macias, RDMS	2025-02-28	2430	F	Y
2024-12-20	4711529	1291585	1983-09-15 08:15:00	Follow up US	Finalized	Present	2025-01-23	84.9	292.2	293	61.7		Robbie Robertson DO	Vicky Martinez, RDMS	2024-12-27	2170	M	Y
2024-12-20	4677723	1685362	1991-05-04 12:16:52	Comp Detailed US	Finalized	Present	2025-05-15	45.2	163.4	140.8	28.3	female	Fred Fredriskson MD	Angelica Zunj, RDMS	2025-05-02	2965	F	Y
2024-12-20	4598146	1692880	1993-11-27 18:29:31	Follow up US	Finalized	Present	2025-01-24	85.9	302.1	264.2	64.4		Robbie Robertson DO	Estefania Traun, RDMS	2025-01-05	1850	F	Y
2024-12-20	4674204	1791051	1998-11-18 13:46:52	Follow up US	Finalized	Present	2025-03-14	71.8	255.1	233.2	53.3	male	Robbie Robertson DO	Veronica Macias, RDMS	2025-03-13	2910	M	Y
2024-12-20	4710208	1855651	2000-07-03 03:19:41	Follow up US	Finalized	Present	2025-02-24	77.8	278.1	269.2	58.5	female	Jennifer Jenson MD	Kaila Limanjaya, RDMS	2025-01-12	2190	F	Y
2024-12-21	4567841	122937	1996-05-30 04:38:26	F/U Fetal Echo	Finalized	Present	2025-03-12	69.3	263.1	240.7	51.4	male	Jennifer Jenson MD	Estefania Traun, RDMS	2025-03-02	3070	M	Y
2024-12-21	4660768	773775	1999-01-17 13:20:09	Comp Detailed US	Finalized	Present	2025-04-15	55.4	212.9	180.5	40.5	male	Robbie Robertson DO	Vicky Martinez, RDMS	2025-03-29	3125	M	Y
2024-12-21	4677825	989330	1997-04-06 00:15:28	Comp Detailed US	Finalized	Present	2025-05-10	45.4	166.3	138	29.3	female	Fred Fredriskson MD	Natalie Serano, RDMS	2025-05-05	3460	F	Y
2024-12-25	4678335	3986	1993-09-15 20:55:46	Follow up US	Finalized	Present	2025-02-09	86.6	305.8	313.2	67.3	male	William Wilson MD	Natalie Serano, RDMS	2025-02-06	3980	M	Y
2024-12-25	4678998	435408	1991-02-05 13:48:16	Comp Detailed US	Finalized	Present	2025-05-15	41.1	170.7	153.2	32.2	male	Jennifer Jenson MD	Angelica Zunj, RDMS	2025-05-09	3410	M	Y
2024-12-25	4674969	484572	1992-12-21 01:28:35	Follow up US	Finalized	Present	2025-02-19	88.9	306.5	295.3	66.3	male	Robbie Robertson DO	Natalie Serano, RDMS	2025-02-16	3800	M	Y
2024-12-26	4632000	39221	1983-02-20 13:59:31	Comp Detailed US	Revised	Present	2025-05-17	43.6	167.2	151.6	29.3	female	Jennifer Jenson MD	Apoorva Kota, RDMS	2025-05-12	3140	F	Y
2024-12-26	4742767	1409367	1991-08-10 08:55:46	Comp Basic US	Finalized	Present	2024-12-26	91.1	337.7	348.9	73.4		Robbie Robertson DO	Matthea Gregorio, RDMS	2024-12-27	3740	F	Y
2024-12-26	4601046	1519104	1994-07-20 17:10:46	Comp Detailed US	Finalized	Present	2025-05-22	43.2	172.2	140.3	29.8	male	William Wilson MD	Veronica Macias, RDMS	2025-05-15	2810	M	Y
2024-12-26	4679151	1685457	1991-05-21 10:37:01	Follow up US	Finalized	Present	2025-01-28	85.7	313.4	306.9	61.8	female	William Wilson MD	Apoorva Kota, RDMS	2025-01-20	2680	F	Y
2024-12-26	4714079	1954288	1978-05-17 15:52:44	Follow up US	Finalized	Present	2025-01-24	90.1	325.5	301.8	63.8		Robbie Robertson DO	Estefania Traun, RDMS	2025-01-19	2670	F	Y
2024-12-27	4537514	11960	1992-02-26 07:03:16	Comp Detailed US	Finalized	Present	2025-05-20	46.1	164.7	144.5	30.2	male	William Wilson MD	Angelica Zunj, RDMS	2025-04-14	2360	M	Y
2024-12-27	4735985	124785	1981-08-11 21:05:37	Follow up US	Finalized	Present	2025-03-24	63.3	256	227.2	51.2	male	Jennifer Jenson MD	Vicky Martinez, RDMS	2025-02-28	2900	M	Y
2024-12-27	4680784	224365	1995-04-11 11:34:41	Follow up US	Finalized	Present	2025-02-21	83.6	301	265.3	59.1	male	Jennifer Jenson MD	Estefania Traun, RDMS	2025-02-21	3250	M	Y
2024-12-27	4680631	274108	1989-04-19 23:12:11	Follow up US	Finalized	Present	2025-03-22	72.7	263.7	243.4	58.4	female	William Wilson MD	Vicky Martinez, RDMS	2025-03-02	3190	F	Y
2024-12-27	4674918	377986	1987-03-06 12:54:50	Follow up US	Finalized	Present	2025-03-31	67.7	242.7	223.2	47.1	male	William Wilson MD	Angelica Zunj, RDMS	2025-03-27	3715	M	Y
2024-12-27	4678794	538465	1988-12-06 01:55:18	Follow up US	Finalized	Present	2025-03-27	67.4	250.3	223.7	50.4		Robbie Robertson DO	Veronica Macias, RDMS	2025-03-23	3370	M	Y
2024-12-27	4679406	749481	2000-09-24 02:22:01	Follow up US	Finalized	Present	2025-02-17	81.3	297.2	287.1	58.1	male	Robbie Robertson DO	Estefania Traun, RDMS	2025-02-14	3935	M	Y
2024-12-27	4679508	1412988	1987-09-22 08:55:46	Follow up US	Finalized	Present	2025-04-19	59.1	228.8	180.5	42.6	male	Robbie Robertson DO	Veronica Macias, RDMS	2025-03-25	2440	M	Y
2024-12-27	4679610	1773145	2003-07-28 09:21:05	Follow up US	Revised	Present	2025-02-20	85.2	295.3	288.7	59.6	male	Jennifer Jenson MD	Angelica Zunj, RDMS	2025-02-24	3270	M	Y
2024-12-27	4541648	1912728	1989-04-24 00:12:39	Comp Detailed US	Finalized	Present	2025-05-21	46.3	164.9	146.3	29.8	male	Andrea Anderson MD	Estefania Traun, RDMS	2025-05-16	3070	M	Y
2024-12-28	4717191	146785	1992-04-20 06:32:20	Follow up US	Finalized	Present	2025-04-27	58	210.3	187.3	39.3		William Wilson MD	Apoorva Kota, RDMS	2025-04-20	3345	M	Y
2024-12-28	4494803	577380	1992-10-24 03:57:39	Comp Detailed US	Finalized	Present	2025-05-20	49.2	174.7	141.9	33.9	male	Robbie Robertson DO	Veronica Macias, RDMS	2025-05-18	3185	M	Y
2024-12-28	4538794	679684	1991-05-21 12:26:43	Comp Detailed US	Finalized	Present	2025-05-23	44.9	168.9	153	28.8		Robbie Robertson DO	Veronica Macias, RDMS	2025-05-15	3450	M	Y
2024-12-28	4679559	871536	2000-09-28 02:20:37	Follow up US	Finalized	Present	2025-03-12	73	264.2	245	57.4		Robbie Robertson DO	Vicky Martinez, RDMS	2025-02-22	3075	F	Y
2024-12-28	4679355	921010	1990-09-17 15:30:56	Follow up US	Finalized	Present	2025-03-20	67.5	254.4	255	50.7	female	William Wilson MD	Apoorva Kota, RDMS	2025-03-20	3190	F	Y
2024-12-28	4743532	1424717	1996-03-27 06:00:00	Follow up US	Finalized	Present	2025-04-14	56.9	222.8	202	42.6	male	Jennifer Jenson MD	Deepa Yow, RDMS	2025-03-24	2935	M	Y
2024-12-28	4679304	1432534	1996-02-18 05:44:31	Follow up US	Finalized	Present	2025-02-21	79	284.3	274.1	62.4	female	William Wilson MD	Veronica Macias, RDMS	2025-02-15	3355	F	Y
2024-12-28	4680886	1502951	1988-06-02 03:49:13	Follow up US	Finalized	Present	2025-02-26	76.4	262	264.6	56.9	female	Jennifer Jenson MD	Vicky Martinez, RDMS	2025-02-11	2680	F	Y
2024-12-28	4708079	1709935	1989-08-13 21:02:48	Follow up US	Finalized	Present	2025-01-18	93.6	335.8	325.4	71.5	female	Jennifer Jenson MD	Natalie Serano, RDMS	2025-01-14	3500	F	Y
2024-12-28	4681039	1847634	1994-01-14 20:23:26	Comp Detailed US	Finalized	Present	2025-05-11	45.2	182.2	159.3	30.1	female	Jennifer Jenson MD	Veronica Macias, RDMS	2025-05-10	3625	F	Y
2024-12-28	4530882	1849187	1991-05-10 11:45:56	Comp Detailed US	Finalized	Present	2025-05-14	48.6	175.5	146.1	29.9	female	William Wilson MD	Veronica Macias, RDMS	2025-05-06	3230	F	Y
2024-12-28	4716474	1878607	1994-03-31 17:31:52	Follow up US	Finalized	Present	2025-02-18	79.9	287	282	62.7		Robbie Robertson DO	Veronica Macias, RDMS	2025-02-18	3670	M	Y
2024-12-29	4756779	1670365	1990-07-08 14:54:22	Follow up US	Finalized	Present	2025-03-27	72.1	266.1	246.3	49.6		Robbie Robertson DO	Laura Gavva, RDMS	2025-01-13	1725	M	Y
2024-12-29	4680478	1985858	1990-09-21 16:13:07	Comp Detailed US	Finalized	Present	2025-05-24	46.8	175	147	31.6	male	Jennifer Jenson MD	Vicky Martinez, RDMS	2025-05-09	3030	M	Y
2024-12-30	4730324	347364	1989-11-04 19:27:11	Follow up US	Finalized	Present	2025-03-01	80.9	298.4	293.4	59.9	male	Robbie Robertson DO	Natalie Serano, RDMS	2025-02-17	4010	M	Y
2024-12-30	4681702	616597	1984-04-23 06:36:33	Comp Detailed US	Finalized	Present	2025-06-02	41	150.5	130	26.9	female	Jennifer Jenson MD	Estefania Traun, RDMS	2025-05-25	3870	F	Y
2024-12-30	4681804	1875884	1994-08-11 15:35:09	Follow up US	Finalized	Present	2025-04-06	70.7	249	234.3	49.8	male	Jennifer Jenson MD	Veronica Macias, RDMS	2025-04-01	4375	M	Y
2025-01-02	4683334	534552	1988-03-09 05:34:41	Follow up US	Finalized	Present	2025-03-28	73.4	268.3	229.5	47.7		Fred Fredriskson MD	Vicky Martinez, RDMS	2025-03-05	2410	F	Y
2025-01-02	4682518	925564	1987-08-18 09:53:26	Comp Detailed US	Finalized	Present	2025-05-15	49.7	190.9	162.8	31.4	male	Robbie Robertson DO	Estefania Traun, RDMS	2025-05-02	3220	M	Y
2025-01-02	4682059	1304807	1979-03-23 11:38:54	Follow up US	Finalized	Present	2025-02-26	87.8	311.8	290.5	63		Jennifer Jenson MD	Angelica Zunj, RDMS	2025-02-21	3875	M	Y
2025-01-02	4694235	1319667	1992-12-26 00:26:43	Follow up US	Finalized	Present	2025-02-09	88.7	307.1	276.2	65.2	male	Robbie Robertson DO	Veronica Macias, RDMS	2025-01-31	2950	M	Y
2025-01-03	4683181	3443	1984-11-27 01:59:31	Follow up US	Finalized	Present	2025-02-28	79.4	306.6	313.3	63.2		Jennifer Jenson MD	Apoorva Kota, RDMS	2025-02-20	3950	M	Y
2025-01-03	4769214	197354	1992-11-26 03:11:15	Comp Detailed US	Finalized	Present	2025-05-21	46.6	176.7	141.2	32.4	female	Robbie Robertson DO	Angelica Zunj, RDMS	2025-05-25	3685	F	Y
2025-01-03	4639447	343738	1993-09-22 21:45:00	Follow up US	Finalized	Present	2025-04-30	57.7	223.7	197.9	39.3	female	Jennifer Jenson MD	Estefania Traun, RDMS	2025-05-01	4220	F	Y
2025-01-03	4681957	527113	1995-11-10 07:38:26	Follow up US	Finalized	Present	2025-01-30	93.1	332.3	330.1	68.2		Jennifer Jenson MD	Estefania Traun, RDMS	2025-01-31	3430	F	Y
2025-01-03	4487968	752134	1994-02-09 19:46:52	Comp Detailed US	Finalized	Present	2025-05-24	43	164.2	143.9	29.7	female	Jennifer Jenson MD	Angelica Zunj, RDMS	2025-05-24	3050	F	Y
2025-01-03	4525513	755011	1987-03-23 12:47:48	Comp Detailed US	Finalized	Present	2025-05-18	47.9	186.3	165.3	38.7	female	Jennifer Jenson MD	Estefania Traun, RDMS	2025-05-06	4640	F	Y
2025-01-03	4614944	839951	1984-06-04 05:13:35	Follow up US	Finalized	Present	2025-04-04	69.5	254.1	251.5	57.6		Jennifer Jenson MD	Vicky Martinez, RDMS	2025-03-30	3460	M	Y
2025-01-03	4694693	1357885	1993-01-29 00:23:54	Follow up US	Finalized	Present	2025-01-25	88.9	337.3	323.7	73.3	male	Robbie Robertson DO	Prithi Dokania, RDMS	2025-01-18	3020	M	Y
2025-01-03	4708740	1677642	1995-01-07 12:57:39	Follow up US	Revised	Present	2025-02-27	81.2	296	265.3	61		Robbie Robertson DO	Prithi Dokania, RDMS	2025-02-05	2410	M	Y
2025-01-03	4617289	1730436	1982-05-06 17:41:00	Follow up US	Finalized	Present	2025-04-12	66.4	236	222.5	45.7	female	Jennifer Jenson MD	Apoorva Kota, RDMS	2025-04-05	3425	F	Y
2025-01-03	4598705	1912568	1992-05-14 05:58:35	Comp Detailed US	Finalized	Present	2025-05-23	47	160.9	147.4	30.9	female	Robbie Robertson DO	Vicky Martinez, RDMS	2025-04-14	2240	F	Y
2025-01-03	4608021	1996959	1985-06-24 22:28:35	Follow up US	Finalized	Present	2025-03-26	70.4	263.2	246.9	55.2	female	Jennifer Jenson MD	Natalie Serano, RDMS	2025-03-15	3310	F	Y
2025-01-04	4646278	102803	1994-01-13 18:54:50	Follow up US	Finalized	Present	2025-02-07	86.6	313.1	310.9	70		Jennifer Jenson MD	Apoorva Kota, RDMS	2025-02-01	2910	M	Y
2025-01-04	4637913	143191	1990-07-19 15:45:00	Follow up US	Finalized	Present	2025-02-18	78.1	299.8	285.7	63.2	female	Robbie Robertson DO	Estefania Traun, RDMS	2025-02-25	3710	F	Y
2025-01-04	4757439	312429	1989-02-04 00:07:01	Follow up US	Finalized	Present	2025-02-13	77.2	283.3	303.1	67.2		Fred Fredriskson MD	Estefania Traun, RDMS	2025-01-30	2890	F	Y
2025-01-04	4616528	354949	1989-07-12 22:14:31	Follow up US	Finalized	Present	2025-03-27	74.1	267	243.4	55.8		Fred Fredriskson MD	Apoorva Kota, RDMS	2025-03-22	4080	F	Y
2025-01-04	4683793	482758	1986-09-14 15:04:13	Follow up US	Finalized	Present	2025-02-28	85.1	316.6	311.7	61.6		Fred Fredriskson MD	Veronica Macias, RDMS	2025-03-02	4080	M	Y
2025-01-04	4632152	740729	1987-01-01 12:14:03	Follow up US	Finalized	Present	2025-02-03	92.4	337.3	327	72.9		Fred Fredriskson MD	Apoorva Kota, RDMS	2025-01-24	3830	M	Y
2025-01-04	4596464	991158	1992-02-18 08:12:11	Comp Detailed US	Finalized	Present	2025-06-01	43.8	169.8	137.9	27.9	female	Jennifer Jenson MD	Vicky Martinez, RDMS	2025-05-25	3260	F	Y
2025-01-04	4683742	1162954	1992-11-24 01:49:41	Follow up US	Finalized	Present	2025-04-21	60.7	220.7	191	44.2		Fred Fredriskson MD	Apoorva Kota, RDMS	2025-03-29	2560	F	Y
2025-01-04	4770895	1540133	1996-06-06 04:06:05	Follow up US	Finalized	Present	2025-01-25	93.6	336.7	325.2	65.9		Fred Fredriskson MD	Prithi Dokania, RDMS	2025-01-23	3110	F	Y
2025-01-04	4590570	1666354	1995-01-11 14:07:58	Comp Detailed US	Revised	Present	2025-05-19	47.8	184.1	159.9	32.3	female	Fred Fredriskson MD	Vicky Martinez, RDMS	2025-05-17	3560	F	Y
2025-01-04	4611786	1992833	1993-04-23 00:40:46	Comp Detailed US	Finalized	Present	2025-05-18	46.4	176.6	151.3	35.9	female	Fred Fredriskson MD	Apoorva Kota, RDMS	2025-05-25	3870	F	Y
2025-01-05	4771357	46773	1988-03-13 06:32:20	Follow up US	Finalized	Present	2025-03-21	76.6	282.9	252.4	52.5		Robbie Robertson DO	Prithi Dokania, RDMS	2025-03-14	3070	F	Y
2025-01-05	4399584	836018	1980-11-03 03:07:44	Fetal Echo	Finalized	Present	2025-05-03	59.9	213.3	179	45.1	male	Robbie Robertson DO	Vicky Martinez, RDMS	2025-05-02	3540	M	Y
2025-01-05	4645973	1369608	1989-03-27 23:43:07	Follow up US	Finalized	Present	2025-02-03	92.2	321.2	300.6	71.8	male	Robbie Robertson DO	Vicky Martinez, RDMS	2025-02-01	3610	M	Y
2025-01-05	4609039	1640312	1986-07-28 15:25:18	Follow up US	Finalized	Present	2025-03-10	74.6	278.1	259.4	60.7		Fred Fredriskson MD	Natalie Serano, RDMS	2025-02-24	2565	F	Y
2025-01-05	4718877	1835807	1987-04-22 11:16:24	Follow up US	Finalized	Present	2025-03-01	79.7	290.9	281.3	59.4		Jennifer Jenson MD	Veronica Macias, RDMS	2025-02-06	2880	F	Y
2025-01-06	4784766	1855651	2000-06-09 03:19:41	Follow up US	Finalized	Present	2025-02-24	81.9	296.8	277.6	63.2	female	Jennifer Jenson MD	Kaila Limanjaya, RDMS	2025-01-12	2190	F	Y
2025-01-07	4784816	1112212	1990-09-17 13:55:18	Comp Basic US	Finalized	Present	2025-03-20	71.1	262	224.6	52.5	male	Jennifer Jenson MD	Kaila Limanjaya, RDMS	2025-01-23	1480	M	Y
2025-01-07	4792297	1706140	2002-10-07 13:34:13	Follow up US	Finalized	Present	2025-02-03	90	319	302	64		Andrea Anderson MD	Matthea Gregorio, RDMS	2025-01-12	2930	F	Y
2025-01-08	4785882	468884	1999-11-08 07:22:58	Follow up US	Finalized	Present	2025-04-27	64.7	233.8	198.1	41		Andrea Anderson MD	Estefania Traun, RDMS	2025-02-16	1525	M	Y
2025-01-08	4809282	1351789	1993-05-21 21:37:58	Follow up US	Finalized	Present	2025-02-13	83.4	296.6	302.9	64.5		Andrea Anderson MD	Kaila Limanjaya, RDMS	2025-01-08	2160	F	Y
2025-01-08	4660973	1799179	1989-04-12 00:47:48	Comp Detailed US	Finalized	Present	2025-06-03	44.4	160.1	139.2	27.7	female	Robbie Robertson DO	Prithi Dokania, RDMS	2025-05-29	3150	F	Y
2025-01-09	4741034	355899	1978-02-04 18:04:55	Comp Basic US	Finalized	Present	2025-03-04	79.1	293.8	308.3	62.4	female	William Wilson MD	Vicky Martinez, RDMS	2025-02-04	2885	F	Y	2930
2025-01-09	4684303	557613	2001-07-29 21:29:31	Follow up US	Finalized	Present	2025-03-04	83.8	300.1	267.8	62.9	female	Robbie Robertson DO	Apoorva Kota, RDMS	2025-02-13	2770	F	Y
2025-01-09	4742970	704931	1990-01-22 19:03:16	Comp Basic US	Revised	Present	2025-03-21	80.8	291.9	272.5	58.6	male	Robbie Robertson DO	Prithi Dokania, RDMS	2025-03-14	4070	M	Y
2025-01-09	4708995	705466	1986-12-08 14:12:11	Follow up US	Finalized	Present	2025-05-08	55.3	203.8	190.4	40.7	female	Andrea Anderson MD	Estefania Traun, RDMS	2025-04-11	2855	F	Y
2025-01-09	4766511	1553089	1992-02-15 06:22:30	Follow up US	Finalized	Present	2025-03-29	71.8	260.9	254.7	52.6		Andrea Anderson MD	Apoorva Kota, RDMS	2025-03-24	4000	M	Y
2025-01-10	4795206	80342	1990-03-24 16:49:41	Comp Basic US	Finalized	Present	2025-02-02	91	336.9	306.3	69.3		Fred Fredriskson MD	Prithi Dokania, RDMS	2025-01-20	3160	M	Y
2025-01-10	4567638	113863	1994-06-30 17:36:05	Comp Detailed US	Finalized	Present	2025-06-05	49	174.2	148.9	29.8	male	William Wilson MD	Vicky Martinez, RDMS	2025-06-04	3175	M	Y
2025-01-10	4694031	217532	1988-04-16 05:17:48	Follow up US	Finalized	Present	2025-04-07	72.1	258.8	233.9	50.1	male	William Wilson MD	Apoorva Kota, RDMS	2025-03-03	2200	M	Y
2025-01-10	4718057	461930	1984-09-26 02:06:33	Follow up US	Finalized	Present	2025-02-07	87.1	303.8	312	66.1		Fred Fredriskson MD	Vicky Martinez, RDMS	2025-02-08	3230	M	Y
2025-01-10	4795665	636226	1987-09-22 08:03:45	Follow up US	Finalized	Present	2025-02-03	86.1	313.4	317	69.5	male	Jennifer Jenson MD	Angelica Zunj, RDMS	2025-01-30	3100	F	Y
2025-01-10	4796329	1310295	1986-06-12 16:22:58	Follow up US	Finalized	Present	2025-04-30	59.4	221.2	197.7	44.1	female	Robbie Robertson DO	Natalie Serano, RDMS	2025-03-24	1770	F	Y
2025-01-10	4761013	1516875	1985-10-31 21:57:39	Comp Detailed US	Finalized	Present	2025-06-07	45.6	166.7	147.9	28.8	female	Robbie Robertson DO	Prithi Dokania, RDMS	2025-05-27	2870	F	Y
2025-01-10	4753526	1658307	1991-05-14 11:09:22	Comp Basic US	Finalized	Present	2025-03-05	81.3	297.5	274.6	61.2		Robbie Robertson DO	Veronica Macias, RDMS	2025-02-26	3020	M	Y
2025-01-11	4766917	42034	1989-08-16 23:12:11	Comp Detailed US	Finalized	Present	2025-06-05	44.7	164.9	144.6	31.6	female	William Wilson MD	Apoorva Kota, RDMS	2025-06-01	3350	F	Y
2025-01-11	4796125	50839	1986-05-30 18:39:22	Comp Detailed US	Finalized	Present	2025-06-01	45.8	169.9	156.3	32.9	male	Robbie Robertson DO	Apoorva Kota, RDMS	2025-06-03	3645	M	Y
2025-01-11	4707722	108049	1977-08-23 20:45:56	Follow up US	Finalized	Present	2025-03-18	81.1	292	276.3	59.5		Fred Fredriskson MD	Prithi Dokania, RDMS	2025-02-20	3090	F	Y
2025-01-11	4818501	131823	1994-02-25 19:45:28	Comp Detailed US	Finalized	Present	2025-06-06	46.4	175.1	141.9	32	female	William Wilson MD	Deepa Yow, RDMS	2025-06-02	3350	F	Y
2025-01-11	4685781	152535	1991-08-19 09:36:33	Follow up US	Finalized	Present	2025-03-07	82.6	289.2	270.7	61.9		William Wilson MD	Vicky Martinez, RDMS	2025-02-24	2620	F	Y
2025-01-11	4685577	234387	1997-09-08 20:54:22	Follow up US	Finalized	Present	2025-03-16	86	300.5	264.4	56.9	male	William Wilson MD	Veronica Macias, RDMS	2025-03-13	3720	M	Y
2025-01-11	4800367	349256	1993-09-22 21:37:58	Comp Detailed US	Finalized	Present	2025-05-28	47.9	182.9	155.3	36.8	male	Jennifer Jenson MD	Deepa Yow, RDMS	2025-05-11	3075	M	Y
2025-01-11	4800774	354352	1986-10-13 15:49:13	Comp Detailed US	Finalized	Present	2025-06-23	39.3	141.9	113.2	23.3	male	Fred Fredriskson MD	Angelica Zunj, RDMS	2025-05-12	2650	M	Y
2025-01-11	4809789	389753	1994-07-18 15:09:50	Follow up US	Finalized	Present	2025-03-19	85.8	315.8	286.2	60.3		Robbie Robertson DO	Juana Manadeva, RDMS	2025-01-24	2425	M	Y
2025-01-11	4685272	487200	1996-08-27 03:07:01	Follow up US	Finalized	Present	2025-03-14	76.9	277.1	282.9	64.2		William Wilson MD	Vicky Martinez, RDMS	2025-02-20	2790	F	Y
2025-01-11	4624140	619526	1986-04-29 16:42:39	Follow up US	Revised	Present	2025-01-29	89.9	323.5	320.1	75	male	Robbie Robertson DO	Vicky Martinez, RDMS	2025-01-27	3020	M	Y
2025-01-11	4751739	733833	1992-06-30 05:20:37	Comp Detailed US	Finalized	Present	2025-06-03	44.6	172	127.1	27.9	female	Jennifer Jenson MD	Natalie Serano, RDMS	2025-06-05	3680	F	Y
2025-01-11	4798433	819863	2001-03-04 00:15:28	Comp Detailed US	Finalized	Present	2025-04-25	61.9	236.3	186.1	45.5	female	Jennifer Jenson MD	Deepa Yow, RDMS	2025-03-07	1425	F	Y
2025-01-11	4817331	968291	1981-09-17 19:57:25	Follow up US	Finalized	Present	2025-02-25	83	314.9	304.9	62.2		William Wilson MD	Deepa Yow, RDMS	2025-02-02	2925	F	Y
2025-01-11	4685424	977922	1987-06-26 11:55:46	Comp Detailed US	Finalized	Present	2025-05-25	50.8	181.4	169.8	32.7	male	Robbie Robertson DO	Apoorva Kota, RDMS	2025-05-19	2935	M	Y
2025-01-11	4692656	1070177	1981-10-09 20:25:32	Follow up US	Finalized	Present	2025-02-28	74.3	296.5	305.7	66.1		William Wilson MD	Estefania Traun, RDMS	2025-02-23	3195	F	Y
2025-01-11	4796074	1590132	1995-10-21 08:36:05	Comp Basic US	Finalized	Present	2025-03-07	82.7	286.9	276.8	59	female	William Wilson MD	Angelica Zunj, RDMS	2025-02-27	3200	F	Y
2025-01-11	4685934	1633941	1986-03-12 18:15:28	Follow up US	Finalized	Present	2025-03-06	88.9	314.6	293.3	60.6	female	William Wilson MD	Apoorva Kota, RDMS	2025-03-10	3520	F	Y
2025-01-11	4744905	1690433	1994-02-19 18:56:15	Comp Detailed US	Finalized	Present	2025-04-23	62.2	225.3	202.8	43.3	female	Fred Fredriskson MD	Natalie Serano, RDMS	2025-04-03	2745	F	Y
2025-01-11	4814013	1701501	1985-03-23 23:02:20	Follow up US	Finalized	Present	2025-02-24	78	285.5	280.5	60.3		Fred Fredriskson MD	Leticia Castro, RDMS	2025-01-25	2270	F	Y
2025-01-11	4817281	1812564	1989-01-14 00:33:45	Comp Detailed US	Finalized	Present	2025-06-03	42.9	173.7	152.8	31.1	female	William Wilson MD	Prithi Dokania, RDMS	2025-02-05	590	F	Y
2025-01-11	4793064	1968293	1991-11-04 07:51:05	Follow up US	Finalized	Present	2025-03-04	82.6	301	284.3	60.3	male	Robbie Robertson DO	Veronica Macias, RDMS	2025-02-27	3370	M	Y
2025-01-12	4603392	496225	1988-11-11 03:32:20	Comp Detailed US	Finalized	Present	2025-06-06	43.9	158.4	135.4	29.7	male	William Wilson MD	Natalie Serano, RDMS	2025-05-28	3370	M	Y
2025-01-12	4813354	556379	1989-07-24 21:57:39	Follow up US	Finalized	Present	2025-02-27	88.2	310.9	294.3	61.7	male	William Wilson MD	Deepa Yow, RDMS	2025-02-23	3980	M	Y
2025-01-12	4719741	1024125	1996-10-23 02:07:58	Follow up US	Finalized	Present	2025-03-18	69.8	251.9	231.5	54.9	female	Robbie Robertson DO	Veronica Macias, RDMS	2025-03-01	2430	F	Y
2025-01-12	4813303	1381525	1987-04-01 12:54:50	Comp Detailed US	Finalized	Present	2025-05-22	53.8	207.8	177.5	36.4	male	William Wilson MD	Deepa Yow, RDMS	2025-05-20	3560	M	Y
2025-01-12	4686189	1849118	1989-01-23 00:26:43	Follow up US	Finalized	Present	2025-03-08	80.6	298	281.7	65	male	Robbie Robertson DO	Estefania Traun, RDMS	2025-03-09	3690	M	Y
2025-01-13	4793777	23701	1985-09-12 22:45:28	Comp Detailed US	Finalized	Present	2025-06-02	43.6	179	154.9	30.2	male	Fred Fredriskson MD	Estefania Traun, RDMS	2025-05-21	2935	M	Y
2025-01-13	4793421	34762	1988-08-30 04:13:07	Comp Detailed US	Finalized	Present	2025-06-02	50.1	179.6	154.3	31.1	male	William Wilson MD	Deepa Yow, RDMS	2025-06-03	3860	M	Y
2025-01-13	4795819	337010	1998-10-14 15:53:26	Comp Detailed US	Finalized	Present	2025-06-04	43.8	165.4	135.4	30.7	male	Fred Fredriskson MD	Deepa Yow, RDMS	2025-05-27	2310	M	Y
2025-01-13	4740271	1279001	1990-07-09 16:42:39	Follow up US	Finalized	Present	2025-05-05	57	221.7	191.2	42.2	uncertain	Robbie Robertson DO	Apoorva Kota, RDMS	2025-04-27	2850	F	Y
2025-01-14	4686903	335056	1997-08-23 22:21:33	Comp Detailed US	Finalized	Present	2025-06-15	40.5	155	135.5	26.9	male	Andrea Anderson MD	Apoorva Kota, RDMS	2025-05-28	3430	M	Y
2025-01-14	4817230	1110224	1994-03-23 19:24:22	Comp Detailed US	Revised	Present	2025-06-12	39.9	150	136.1	29.8	male	Jennifer Jenson MD	Deepa Yow, RDMS	2025-05-25	4620	M	Y
2025-01-15	4687107	340441	1990-10-23 14:52:58	F/U Fetal Echo	Finalized	Present	2025-05-06	60.4	224.1	203.1	44.7	male	Andrea Anderson MD	Apoorva Kota, RDMS	2025-04-07	2435	M	Y
2025-01-15	4569829	515295	1985-09-25 22:24:22	Comp Detailed US	Finalized	Present	2025-06-10	42.7	162.1	140.5	25.3	male	Andrea Anderson MD	Deepa Yow, RDMS	2025-06-08	3685	M	Y
2025-01-15	4710157	744789	1995-01-11 13:35:37	Follow up US	Finalized	Present	2025-04-16	78.9	279.8	261.7	54.9	female	Jennifer Jenson MD	Estefania Traun, RDMS	2025-04-12	4030	F	Y
2025-01-15	4760041	865737	1989-12-25 19:44:03	Follow up US	Finalized	Present	2025-04-30	64.2	239.7	214.8	49.4		Fred Fredriskson MD	Natalie Serano, RDMS	2025-04-12	3840	M	Y
2025-01-15	4819673	1539883	1985-08-24 21:14:03	Follow up US	Finalized	Present	2025-02-10	90.6	335.1	349.8	69.2		William Wilson MD	Estefania Traun, RDMS	2025-02-04	3730	F	Y
2025-01-15	4782272	1588264	1992-10-20 01:59:31	Comp Basic US	Finalized	Present	2025-03-17	88.8	308.6	286.4	62.1	male	William Wilson MD	Veronica Macias, RDMS	2025-02-07	2615	M	Y
2025-01-15	4714386	1625671	1993-10-01 21:40:46	Follow up US	Finalized	Present	2025-05-06	52.4	193.3	181.4	36.2		Andrea Anderson MD	Vicky Martinez, RDMS	2025-04-19	1930	M	Y
2025-01-16	4776558	423826	1987-03-11 12:12:39	Follow up US	Finalized	Present	2025-03-17	73.8	281.8	277.9	62.7	female	Jennifer Jenson MD	Veronica Macias, RDMS	2025-03-11	3700	F	Y
2025-01-16	4798331	559547	1992-08-27 04:46:52	Comp Detailed US	Finalized	Present	2025-06-04	44.5	174.5	145.8	29.6	female	William Wilson MD	Prithi Dokania, RDMS	2025-05-30	2930	F	Y
2025-01-16	4812591	1091247	1989-06-19 22:58:07	Follow up US	Finalized	Present	2025-04-19	70.4	260.4	233.2	52.6	female	Jennifer Jenson MD	Estefania Traun, RDMS	2025-04-16	3590	F	Y
2025-01-16	4804437	1129421	1998-06-09 17:36:05	Comp Detailed US	Finalized	Present	2025-05-14	59.3	215.4	184.6	41.7	female	William Wilson MD	Vicky Martinez, RDMS	2025-05-08	3120	F	Y
2025-01-16	4778034	1685494	1991-06-24 09:46:24	Follow up US	Finalized	Present	2025-02-10	85.6	320.9	330.2	74.3	female	Jennifer Jenson MD	Veronica Macias, RDMS	2025-02-02	3485	F	Y
2025-01-16	4687311	1920477	1996-08-27 03:26:43	Follow up US	Finalized	Present	2025-03-14	86.4	309	278.1	63.4	male	Jennifer Jenson MD	Angelica Zunj, RDMS	2025-03-07	3110	M	Y
2025-01-17	4748227	124785	1981-08-12 21:05:37	Follow up US	Finalized	Present	2025-03-24	75.4	290.5	262.9	54.4		Fred Fredriskson MD	Prithi Dokania, RDMS	2025-03-02	2900	M	Y
2025-01-17	4806065	615675	1987-07-25 09:36:33	Comp Detailed US	Finalized	Present	2025-03-12	94.7	330.8	309.3	65	male	William Wilson MD	Prithi Dokania, RDMS	2025-03-06	4360	M	Y
2025-01-17	4829647	1216950	2003-01-19 12:57:39	Comp Basic US	Finalized	Present	2025-04-13	66.5	247	215	49		Andrea Anderson MD	Kaila Limanjaya, RDMS	2025-04-04	2490	M	Y
2025-01-18	4723055	122937	1996-05-29 04:38:26	F/U Fetal Echo	Finalized	Present	2025-03-11	80.5	296.2	290.2	58.7		Fred Fredriskson MD	Estefania Traun, RDMS	2025-03-02	3070	M	Y
2025-01-18	4810702	765748	1995-07-16 10:24:22	Comp Detailed US	Finalized	Present	2025-05-27	52.4	189.2	179.1	38.8	female	Fred Fredriskson MD	Vicky Martinez, RDMS	2025-04-16	2830	F	Y
2025-01-18	4719284	1200708	1989-10-28 20:24:50	Follow up US	Finalized	Present	2025-04-22	63.8	234.9	209	50.8		Fred Fredriskson MD	Estefania Traun, RDMS	2025-04-12	3095	F	Y
2025-01-18	4767733	1319667	1993-01-19 00:26:43	Follow up US	Finalized	Present	2025-02-07	87.5	316.3	299.3	67.3	male	Jennifer Jenson MD	Veronica Macias, RDMS	2025-02-02	2950	M	Y
2025-01-18	4687413	1326604	1992-02-23 06:05:37	Comp Basic US	Finalized	Present	2025-03-08	85.1	293	269.5	65.1	male	Jennifer Jenson MD	Estefania Traun, RDMS	2025-02-14	2530	M	Y
2025-01-18	4728800	1791051	1998-11-22 13:46:52	Follow up US	Revised	Present	2025-03-15	86.1	303.8	288.6	61.7		Fred Fredriskson MD	Prithi Dokania, RDMS	2025-03-15	2910	M	Y
2025-01-18	4688280	1992513	1994-03-29 17:54:22	Comp Basic US	Revised	Present	2025-03-12	78.6	291.7	265.4	61.9	female	William Wilson MD	Estefania Traun, RDMS	2025-03-09	2580	F	Y
2025-01-19	4624855	192193	1993-06-16 23:55:46	Comp Detailed US	Finalized	Present	2025-05-17	51.9	206.7	180.2	40.5	male	William Wilson MD	Veronica Macias, RDMS	2025-05-09	3380	M	Y
2025-01-19	4745979	224365	1995-03-06 11:34:41	Follow up US	Finalized	Present	2025-02-23	87.5	317.5	301.4	64.7	male	William Wilson MD	Vicky Martinez, RDMS	2025-02-21	3250	M	Y
2025-01-19	4769418	1626740	1992-05-10 04:42:39	Comp Basic US	Finalized	Present	2025-02-26	80.8	288.1	275.9	65.6	female	William Wilson MD	Veronica Macias, RDMS	2025-02-03	2270	F	Y
2025-01-19	4752710	1875884	1994-08-04 15:35:09	Follow up US	Revised	Present	2025-04-06	74.7	279.3	273.1	59.8	male	William Wilson MD	Prithi Dokania, RDMS	2025-04-01	4375	M	Y
2025-01-20	4780739	125852	1993-07-27 20:55:46	Comp Basic US	Finalized	Present	2025-02-15	87.6	320	313.1	67	female	Jennifer Jenson MD	Veronica Macias, RDMS	2025-02-10	3470	F	Y
2025-01-20	4810906	260622	1993-05-05 23:15:00	Follow up US	Finalized	Present	2025-03-10	89.5	315.4	309	66.4		Fred Fredriskson MD	Natalie Serano, RDMS	2025-02-22	3200	F	Y
2025-01-20	4845672	347364	1989-11-08 19:27:11	Comp Basic US	Finalized	Present	2025-03-01	88.8	324.3	328.7	65.3	male	Jennifer Jenson MD	Natalie Serano, RDMS	2025-02-15	4010	M	Y
2025-01-20	4602166	563764	1992-04-02 07:27:11	Comp Detailed US	Finalized	Present	2025-06-14	44.7	161.5	152	27.4	male	Fred Fredriskson MD	Natalie Serano, RDMS	2025-06-15	3990	M	Y
2025-01-20	4810855	839951	1984-05-07 05:13:35	Comp Basic US	Finalized	Present	2025-04-04	74.5	280	276.1	59.4		Jennifer Jenson MD	Natalie Serano, RDMS	2025-03-30	3460	M	Y
2025-01-21	4717598	15276	1990-06-05 17:41:43	Comp Detailed US	Finalized	Present	2025-06-13	46.9	178.7	148.9	34.1	male	Robbie Robertson DO	Veronica Macias, RDMS	2025-05-30	3775	M	Y
2025-01-21	4854909	485188	1986-10-08 13:52:30	Comp Basic US	Finalized	Present	2025-03-06	86	307.2	287.5	65.3		Andrea Anderson MD	Laura Gavva, RDMS	2025-01-24	2210	F	Y
2025-01-21	4759378	1866675	1989-05-12 00:21:05	Comp Detailed US	Finalized	Present	2025-06-26	46.3	165.6	136.1	31.5	male	Robbie Robertson DO	Angelica Zunj, RDMS	2025-06-09	3510	M	Y
2025-01-22	4846995	312429	1989-02-06 00:07:01	Follow up US	Finalized	Present	2025-02-14	80.6	302.4	332.6	73.6		Robbie Robertson DO	Prithi Dokania, RDMS	2025-01-29	2890	F	Y
2025-01-22	4733845	377986	1987-03-04 12:54:50	Follow up US	Finalized	Present	2025-03-30	75.8	290.6	271.5	57.5	male	Andrea Anderson MD	Veronica Macias, RDMS	2025-03-29	3715	M	Y
2025-01-22	4773294	655210	1992-11-05 04:08:54	Comp Detailed US	Finalized	Present	2025-06-19	43.1	158.5	129	34.8	female	Andrea Anderson MD	Natalie Serano, RDMS	2025-06-13	2650	F	Y
2025-01-23	4688637	354050	1986-03-27 17:20:37	Comp Basic US	Finalized	Present	2025-03-18	77.9	282.3	262.9	60.1		Robbie Robertson DO	Apoorva Kota, RDMS	2025-02-27	2380	F	Y
2025-01-23	4854246	361470	1992-04-22 06:46:24	Comp Detailed US	Finalized	Present	2025-06-13	47.5	172.1	145.1	33.1	female	William Wilson MD	Estefania Traun, RDMS	2025-05-17	3070	F	Y
2025-01-23	4773346	740729	1987-01-12 12:14:03	Follow up US	Finalized	Present	2025-02-03	93.6	340.1	356.1	73.7		Andrea Anderson MD	Angelica Zunj, RDMS	2025-01-25	3830	M	Y
2025-01-23	4688790	934350	1989-02-09 00:16:52	Follow up US	Revised	Present	2025-03-19	82.3	302.4	282.6	62.5	male	William Wilson MD	Veronica Macias, RDMS	2025-03-09	3060	M	Y
2025-01-23	4834070	1677642	1994-11-26 12:57:39	Follow up US	Revised	Present	2025-02-28	86.4	316	299.2	65.4		William Wilson MD	Angelica Zunj, RDMS	2025-02-05	2410	M	Y
2025-01-23	4856638	1829980	1988-01-28 06:12:39	Follow up US	Finalized	Present	2025-03-18	81.2	295.2	283.1	65		Robbie Robertson DO	Angelica Zunj, RDMS	2025-03-02	2960	M	Y
2025-01-23	4745621	1985858	1990-08-20 16:13:07	Follow up US	Finalized	Present	2025-05-24	58.5	211.4	192.2	40.6	male	William Wilson MD	Apoorva Kota, RDMS	2025-05-10	3030	M	Y
2025-01-24	4817584	39985	1991-01-31 12:52:01	Comp Basic US	Finalized	Present	2025-04-10	75	276.4	264.5	58.7	male	Robbie Robertson DO	Veronica Macias, RDMS	2025-04-05	3590	M	Y
2025-01-24	4639396	330177	1988-08-20 05:20:37	Comp Detailed US	Finalized	Present	2025-06-21	43	156	137.6	26.1	female	Jennifer Jenson MD	Apoorva Kota, RDMS	2025-06-14	2950	F	Y
2025-01-24	4840689	423826	1987-02-09 12:12:39	Comp Basic US	Finalized	Present	2025-03-18	81.6	307.6	294.1	63.5	female	Jennifer Jenson MD	Natalie Serano, RDMS	2025-03-13	3700	F	Y
2025-01-24	4845367	463210	1983-05-02 12:43:35	Comp Detailed US	Finalized	Present	2025-05-14	65.3	228.3	175.2	44.3	female	Robbie Robertson DO	Estefania Traun, RDMS	2025-05-06	2480	F	Y
2025-01-24	4794286	476636	1991-10-16 10:20:09	Comp Detailed US	Finalized	Present	2025-06-19	45	164.6	138.1	28.7	male	William Wilson MD	Prithi Dokania, RDMS	2025-06-17	3100	M	Y
2025-01-24	4816565	552402	1995-02-02 13:21:33	Comp Basic US	Finalized	Present	2025-04-23	71.5	256.1	222.6	53.9	female	Andrea Anderson MD	Apoorva Kota, RDMS	2025-04-03	2750	F	Y
2025-01-24	4871564	871536	2000-09-15 02:20:37	Follow up US	Finalized	Present	2025-03-12	85.5	305.9	291	62.5		Robbie Robertson DO	Deepa Yow, RDMS	2025-02-21	3075	F	Y
2025-01-24	4739505	1012674	1984-06-05 06:28:07	Comp Detailed US	Finalized	Present	2025-06-21	46.2	165.2	137.3	30.1	female	Robbie Robertson DO	Apoorva Kota, RDMS	2025-06-01	2545	F	Y
2025-01-24	4865401	1161687	1991-03-12 14:05:09	Comp Detailed US	Finalized	Present	2025-06-23	42.2	163.4	130.4	26.2	male	William Wilson MD	Apoorva Kota, RDMS	2025-06-12	3200	M	Y
2025-01-24	4850421	1424717	1996-03-09 06:00:00	Follow up US	Finalized	Present	2025-04-14	68.8	265.3	251.9	54.3	male	Robbie Robertson DO	Prithi Dokania, RDMS	2025-03-24	2935	M	Y
2025-01-25	4822070	128029	1992-12-31 02:47:20	Comp Detailed US	Revised	Present	2025-06-08	50.1	185.9	165.6	32.3	male	Jennifer Jenson MD	Prithi Dokania, RDMS	2025-05-21	2625	M	Y
2025-01-25	4722700	244476	1991-04-05 13:01:52	Comp Detailed US	Revised	Present	2025-06-24	43.5	162	136.6	26.6	female	Robbie Robertson DO	Estefania Traun, RDMS	2025-06-10	2930	F	Y
2025-01-25	4746489	274108	1989-04-21 23:12:11	Follow up US	Finalized	Present	2025-03-21	83.1	313.1	295	68.7	female	William Wilson MD	Apoorva Kota, RDMS	2025-03-03	3190	F	Y
2025-01-25	4738892	1412988	1987-10-30 08:55:46	Follow up US	Finalized	Present	2025-04-17	71.6	263.6	230.8	53.8	male	Jennifer Jenson MD	Apoorva Kota, RDMS	2025-03-24	2440	M	Y
2025-01-25	4851338	1432534	1996-03-25 05:44:31	Follow up US	Finalized	Present	2025-02-20	86.3	314.3	320.8	71.9	female	Jennifer Jenson MD	Prithi Dokania, RDMS	2025-02-14	3355	F	Y
2025-01-25	4746132	1502951	1988-07-04 03:49:13	Follow up US	Finalized	Present	2025-02-26	85.6	307.8	305.1	65.8	female	William Wilson MD	Apoorva Kota, RDMS	2025-02-12	2680	F	Y
2025-01-25	4748176	1878607	1994-04-09 17:31:52	Follow up US	Finalized	Present	2025-02-19	86.9	326.3	325.9	63.3		William Wilson MD	Apoorva Kota, RDMS	2025-02-18	3670	M	Y
2025-01-26	4880944	182048	2009-06-17 22:27:11	Comp Detailed US	Finalized	Present	2025-04-16	69.8	258.9	226.4	51.1	female	Jennifer Jenson MD	Angelica Zunj, RDMS	2025-03-09	2200	F	Y
2025-01-26	4755462	616597	1984-04-03 06:36:33	Follow up US	Finalized	Present	2025-06-01	54.9	202.6	171.9	39		Fred Fredriskson MD	Estefania Traun, RDMS	2025-05-24	3870	F	Y
2025-01-26	4548268	710787	2002-02-25 19:53:54	Comp Detailed US	Finalized	Present	2025-06-13	46.4	170.6	143.3	32.8	female	Fred Fredriskson MD	Natalie Serano, RDMS	2025-06-14	3690	F	Y
2025-01-26	4880842	1159777	1978-01-16 19:46:52	Follow up US	Finalized	Present	2025-04-26	77.1	275.8	252.8	57.6	male	William Wilson MD	Deepa Yow, RDMS	2025-04-15	4040	M	Y
2025-01-27	4813911	3986	1993-09-12 20:55:46	Follow up US	Finalized	Present	2025-02-08	98.1	330.8	340.6	77.8	male	William Wilson MD	Natalie Serano, RDMS	2025-02-06	3980	M	Y
2025-01-27	4689811	419054	1987-09-17 09:36:33	Follow up US	Finalized	Present	2025-03-21	80.7	286.7	274.2	57.1	female	Robbie Robertson DO	Veronica Macias, RDMS	2025-03-22	2905	F	Y
2025-01-27	4891190	1070177	1981-10-06 20:25:32	Comp Basic US	Revised	Present	2025-02-28	77.9	305.1	319.8	66.6		Fred Fredriskson MD	Matthea Gregorio, RDMS	2025-02-24	3195	F	Y
2025-01-27	4822934	1542863	1991-04-23 12:37:58	Comp Detailed US	Finalized	Present	2025-06-14	50.5	185.3	154.5	33.5	male	Robbie Robertson DO	Veronica Macias, RDMS	2025-06-08	3725	M	Y
2025-01-27	4850676	1891840	1990-10-03 14:36:05	Comp Basic US	Finalized	Present	2025-04-12	75.3	270.7	220.3	55.1	male	Fred Fredriskson MD	Prithi Dokania, RDMS	2025-03-31	2490	M	Y
2025-01-28	4851492	770956	1984-07-21 03:28:07	Comp Basic US	Finalized	Present	2025-02-22	98.8	349.3	358.3	81.2	male	Fred Fredriskson MD	Prithi Dokania, RDMS	2025-02-06	4020	M	Y
2025-01-28	4690270	1996959	1985-06-14 22:28:35	Follow up US	Revised	Present	2025-03-26	82.3	298.3	284.6	67.9		Fred Fredriskson MD	Natalie Serano, RDMS	2025-03-14	3310	F	Y
2025-01-29	4560146	129059	1980-12-14 03:15:28	Comp Detailed US	Finalized	Present	2025-06-23	44	167.4	149.1	32.4	male	Robbie Robertson DO	Apoorva Kota, RDMS	2025-06-08	3270	M	Y
2025-01-29	4877535	331730	1985-05-23 00:04:13	Comp Detailed US	Finalized	Present	2025-06-10	54.7	200.4	165	37.6	male	Jennifer Jenson MD	Prithi Dokania, RDMS	2025-05-21	3580	M	Y
2025-01-29	4897667	409075	1991-04-13 10:51:05	Follow up US	Finalized	Present	2025-05-28	57.9	214	195.3	43.5		Jennifer Jenson MD	Matthea Gregorio, RDMS	2025-02-24	1015	M	Y
2025-01-29	4891292	1243424	1993-03-07 00:04:13	Follow up US	Finalized	Present	2025-04-29	72.6	254	222.1	48.6	male	Fred Fredriskson MD	Juana Manadeva, RDMS	2025-03-25	2545	M	Y
2025-01-29	4819064	1606220	1994-07-29 17:40:18	Comp Detailed US	Finalized	Present	2025-06-25	46	168.3	136.9	30.2	male	Jennifer Jenson MD	Veronica Macias, RDMS	2025-06-04	3000	M	Y
2025-01-29	4605480	1685331	1993-01-23 03:01:24	Comp Detailed US	Revised	Present	2025-06-28	46	170.7	145.2	29.2	male	Robbie Robertson DO	Apoorva Kota, RDMS	2025-06-25	4040	M	Y
2025-01-29	4690219	1730436	1982-05-26 17:41:00	Follow up US	Finalized	Present	2025-04-12	76.9	281.6	274.8	53.8	female	Jennifer Jenson MD	Estefania Traun, RDMS	2025-04-04	3425	F	Y
2025-01-29	4783545	1773145	2003-09-06 09:21:05	Follow up US	Finalized	Present	2025-02-21	89.9	324.3	327.5	71.9	male	Robbie Robertson DO	Angelica Zunj, RDMS	2025-02-22	3270	M	Y
2025-01-29	4676445	1881001	1990-05-31 18:05:37	Comp Detailed US	Finalized	Present	2025-06-21	46.9	170.5	153.5	33.3	male	Jennifer Jenson MD	Apoorva Kota, RDMS	2025-06-24	3180	M	Y
2025-01-30	4808310	354352	1986-10-23 15:49:13	Follow up US	Revised	Present	2025-06-23	45.2	165.3	142.1	30.2	male	Jennifer Jenson MD	Veronica Macias, RDMS	2025-05-12	2650	M	Y
2025-01-30	4690066	538465	1988-12-15 01:55:18	Follow up US	Finalized	Present	2025-03-27	80.4	295.4	272	61.8		Jennifer Jenson MD	Angelica Zunj, RDMS	2025-03-22	3370	M	Y
2025-01-30	4677417	597528	1995-01-02 14:00:56	Follow up US	Finalized	Present	2025-04-28	66.4	240	218.9	53.4	female	Jennifer Jenson MD	Veronica Macias, RDMS	2025-05-04	3530	F	Y
2025-01-30	4738430	749481	2000-10-06 02:22:01	Follow up US	Revised	Present	2025-02-19	92.3	336.3	332.7	69.6	male	Robbie Robertson DO	Angelica Zunj, RDMS	2025-02-16	3935	M	Y
2025-01-30	4804692	819863	2001-03-19 00:15:28	Follow up US	Finalized	Present	2025-04-26	67.4	260.1	222.9	51.4		Robbie Robertson DO	Apoorva Kota, RDMS	2025-03-08	1425	F	Y
2025-01-30	4868556	934350	1989-02-04 00:16:52	Comp Basic US	Finalized	Present	2025-03-20	86.3	303.4	290.8	59.7	male	Jennifer Jenson MD	Natalie Serano, RDMS	2025-03-10	3060	M	Y
2025-01-30	4831077	1214777	1978-07-07 16:33:30	Follow up US	Finalized	Present	2025-03-08	85.3	312.4	296.3	67.5	female	Jennifer Jenson MD	Natalie Serano, RDMS	2025-03-01	2280	F	Y
2025-01-30	4882316	1253519	1986-10-03 15:11:15	Comp Basic US	Finalized	Present	2025-03-15	86.5	323.5	314.5	66.7	female	Jennifer Jenson MD	Angelica Zunj, RDMS	2025-03-09	3970	F	Y
2025-01-30	4871513	1304807	1979-04-04 11:38:54	Follow up US	Finalized	Present	2025-02-27	94.9	338	337.3	66.6		Robbie Robertson DO	Angelica Zunj, RDMS	2025-02-22	3875	M	Y
2025-01-30	4739146	1460249	2001-04-01 23:54:22	Follow up US	Finalized	Present	2025-03-28	80.3	288.8	274.9	59.9	female	Robbie Robertson DO	Apoorva Kota, RDMS	2025-03-31	3530	F	Y
2025-01-30	4785830	1583543	1990-05-16 18:21:05	Comp Detailed US	Revised	Present	2025-06-14	52.6	188.8	162.2	31.8	female	Robbie Robertson DO	Veronica Macias, RDMS	2025-06-08	3310	F	Y
2025-01-30	4842621	1849118	1989-03-20 00:26:43	Follow up US	Finalized	Present	2025-03-09	86.7	316.6	298.3	68.5		Robbie Robertson DO	Veronica Macias, RDMS	2025-03-08	3690	M	Y
2025-01-30	4883638	1895532	1994-07-05 15:56:15	Follow up US	Finalized	Present	2025-02-25	89.5	335.8	328.5	67.1		Fred Fredriskson MD	Apoorva Kota, RDMS	2025-02-23	3480	M	Y
2025-01-31	4847913	152535	1991-08-30 09:36:33	Comp Basic US	Finalized	Present	2025-03-06	86.2	310.1	272	68.1		Fred Fredriskson MD	Estefania Traun, RDMS	2025-02-26	2620	F	Y
2025-01-31	4820951	1024125	1996-11-23 02:07:58	Follow up US	Finalized	Present	2025-03-20	81.7	297.7	261.6	64.6		Fred Fredriskson MD	Deepa Yow, RDMS	2025-03-01	2430	F	Y
2025-01-31	4824513	1110224	1994-03-28 19:24:22	Fetal Echo	Finalized	Present	2025-06-12	48.9	183.4	153.1	37		Robbie Robertson DO	Estefania Traun, RDMS	2025-05-25	4620	M	Y
2025-01-31	4698813	1138173	1987-05-22 12:26:43	Comp Detailed US	Finalized	Present	2025-06-20	42.6	171.1	140.4	27.8	female	Robbie Robertson DO	Estefania Traun, RDMS	2025-06-16	3090	F	Y
2025-01-31	4737414	1202958	1994-11-23 14:52:58	Comp Detailed US	Finalized	Present	2025-06-26	46.3	169.3	139.8	32.2	female	Jennifer Jenson MD	Estefania Traun, RDMS	2025-06-04	2840	F	Y
2025-01-31	4892209	1691021	1991-01-25 14:40:18	Comp Detailed US	Finalized	Present	2025-06-27	38.8	163.6	144.5	29.1	male	Robbie Robertson DO	Angelica Zunj, RDMS	2025-06-15	3720	M	Y
2025-02-01	4799399	3443	1984-09-30 01:59:31	Follow up US	Finalized	Present	2025-03-02	89.3	326.5	354.9	72.5		Robbie Robertson DO	Apoorva Kota, RDMS	2025-02-19	3950	M	Y
2025-02-01	4738176	921010	1990-08-11 15:30:56	Follow up US	Finalized	Present	2025-03-21	81.8	298	292.2	62.3	female	Jennifer Jenson MD	Natalie Serano, RDMS	2025-03-20	3190	F	Y
2025-02-01	4690984	1120559	2000-03-23 06:01:24	Follow up US	Finalized	Present	2025-03-29	79.3	299.7	284.8	61.5	male	Jennifer Jenson MD	Estefania Traun, RDMS	2025-02-27	3100	M	Y
2025-02-01	4834631	1625671	1993-08-20 21:40:46	Follow up US	Finalized	Present	2025-05-07	53	220.4	198.1	41.7		Fred Fredriskson MD	Veronica Macias, RDMS	2025-04-19	1930	M	Y
2025-02-01	4890733	1645113	1991-06-15 11:19:13	Comp Basic US	Finalized	Present	2025-04-23	79.2	282.4	248.4	57.9	female	Fred Fredriskson MD	Angelica Zunj, RDMS	2025-04-19	3900	F	Y
2025-02-02	4857147	354949	1989-08-09 22:14:31	Follow up US	Finalized	Present	2025-03-28	81.5	303.3	291.8	61.5		Fred Fredriskson MD	Estefania Traun, RDMS	2025-03-22	4080	F	Y
2025-02-02	4836159	355899	1978-02-27 18:04:55	Follow up US	Finalized	Present	2025-03-02	86.8	309	334.5	67.1	female	Jennifer Jenson MD	Apoorva Kota, RDMS	2025-02-03	2885	F	Y
2025-02-02	4595347	494433	2005-05-21 23:54:22	Comp Detailed US	Finalized	Present	2025-06-24	43.5	157	144	29.3	female	Robbie Robertson DO	Estefania Traun, RDMS	2025-06-06	2570	F	Y
2025-02-02	4906434	534552	1988-03-13 05:34:41	Follow up US	Finalized	Present	2025-03-30	83.3	297	275.2	60.3		Jennifer Jenson MD	Angelica Zunj, RDMS	2025-03-04	2410	F	Y
2025-02-02	4690882	1182275	1986-03-17 18:26:43	Follow up US	Finalized	Present	2025-03-30	87.4	310.4	286.8	60.7		Fred Fredriskson MD	Apoorva Kota, RDMS	2025-03-28	3400	F	Y
2025-02-02	4774163	1640312	1986-07-19 15:25:18	Follow up US	Finalized	Present	2025-03-12	82.1	297.7	300.8	67.4		Fred Fredriskson MD	Veronica Macias, RDMS	2025-02-24	2565	F	Y
2025-02-02	4901849	1835807	1987-03-09 11:16:24	Follow up US	Finalized	Present	2025-02-27	88.2	322.5	315.7	66.2		Jennifer Jenson MD	Angelica Zunj, RDMS	2025-02-07	2880	F	Y	2870
2025-02-03	4781554	46773	1988-02-24 06:32:20	Follow up US	Finalized	Present	2025-03-22	89	310.2	293.2	66.6		Robbie Robertson DO	Apoorva Kota, RDMS	2025-03-13	3070	F	Y
2025-02-03	4924039	916867	1998-07-18 15:28:07	Comp Basic US	Finalized	Present	2025-03-26	74.4	278.2	275.5	58.8		Jennifer Jenson MD	Leticia Castro, RDMS	2025-02-13	2000	F	Y
2025-02-03	4784261	1162954	1992-11-29 01:49:41	Follow up US	Finalized	Present	2025-04-20	70.2	257.9	240	51.7		Jennifer Jenson MD	Natalie Serano, RDMS	2025-03-28	2560	F	Y
2025-02-03	4705688	1643573	1992-11-27 03:39:22	Comp Detailed US	Finalized	Present	2025-06-28	43.7	164.6	144.3	28.5	female	Robbie Robertson DO	Natalie Serano, RDMS	2025-06-25	3430	F	Y
2025-02-04	4757746	150721	1992-12-20 02:47:20	Comp Detailed US	Finalized	Present	2025-06-30	43.9	161.1	144.9	30.8	female	Andrea Anderson MD	Prithi Dokania, RDMS	2025-06-15	3950	F	Y
2025-02-04	4791940	1553089	1992-02-19 06:22:30	Follow up US	Revised	Present	2025-03-29	82.5	298.6	291.1	65.1		Robbie Robertson DO	Estefania Traun, RDMS	2025-03-25	4000	M	Y
2025-02-05	4882367	712422	1996-10-28 04:08:54	Comp Detailed US	Finalized	Present	2025-06-29	38.7	153.6	138.7	28.1	female	Jennifer Jenson MD	Estefania Traun, RDMS	2025-07-04	3655	F	Y
2025-02-05	4831991	977922	1987-06-26 11:55:46	Follow up US	Finalized	Present	2025-05-26	63.1	225.8	209.9	43.5	male	Robbie Robertson DO	Apoorva Kota, RDMS	2025-05-19	2935	M	Y
2025-02-05	4740373	1279001	1990-06-25 16:42:39	Follow up US	Finalized	Present	2025-05-04	69.2	245	233.5	49	uncertain	Andrea Anderson MD	Vicky Martinez, RDMS	2025-04-27	2850	F	Y
2025-02-05	4745161	1396277	1987-07-12 12:19:41	Comp Detailed US	Finalized	Present	2025-07-03	42.4	160.1	130.6	30.1	female	Robbie Robertson DO	Natalie Serano, RDMS	2025-07-03	3560	F	Y
2025-02-06	4911897	32755	1997-12-28 20:41:43	Comp Detailed US	Finalized	Present	2025-06-19	49.1	187.7	160.5	34.7	male	Jennifer Jenson MD	Deepa Yow, RDMS	2025-06-06	3785	M	Y
2025-02-06	4870442	234387	1997-10-11 20:54:22	Follow up US	Finalized	Present	2025-03-16	90.8	323.7	314.8	68	male	Robbie Robertson DO	Prithi Dokania, RDMS	2025-03-12	3720	M	Y
2025-02-06	4934335	251785	1988-02-16 06:15:28	Comp Basic US	Finalized	Present	2025-03-29	70	274.2	256.2	56		Robbie Robertson DO	Laura Gavva, RDMS	2025-02-09	1500	M	Y
2025-02-06	4827563	482758	1986-08-09 15:04:13	Follow up US	Finalized	Present	2025-02-28	93	334.2	349.5	72.7		Andrea Anderson MD	Apoorva Kota, RDMS	2025-02-28	4080	M	Y
2025-02-06	4500826	887661	1996-02-21 07:06:05	Follow up US	Finalized	Present	2025-04-03	83.6	308.3	287.4	64		William Wilson MD	Angelica Zunj, RDMS	2025-03-29	3690	M	Y
2025-02-06	4734661	932923	1995-11-02 09:04:13	Comp Detailed US	Finalized	Present	2025-06-22	45.9	175.6	152.2	32.9	female	Andrea Anderson MD	Angelica Zunj, RDMS	2025-04-20	1200	F	Y
2025-02-06	4852764	1326604	1992-03-04 06:05:37	Follow up US	Finalized	Present	2025-03-10	86.4	315.5	296.7	71.9	male	Jennifer Jenson MD	Estefania Traun, RDMS	2025-02-13	2530	M	Y
2025-02-06	4867437	1621919	1996-07-16 05:12:11	Comp Detailed US	Finalized	Present	2025-04-26	76.3	270.2	247.5	55.4	female	Robbie Robertson DO	Angelica Zunj, RDMS	2025-04-22	3020	F	Y
2025-02-06	4900521	1972629	1991-07-16 10:10:18	Follow up US	Finalized	Present	2025-02-15	95.4	337.5	347.3	73.8	female	William Wilson MD	Prithi Dokania, RDMS	2025-02-16	3630	F	Y
2025-02-07	4836872	122937	1996-06-30 04:38:26	F/U Fetal Echo	Finalized	Present	2025-03-11	85.1	311.8	311	63.4		Robbie Robertson DO	Estefania Traun, RDMS	2025-03-03	3070	M	Y
2025-02-07	4628477	202270	1991-03-16 13:52:30	Comp Detailed US	Finalized	Present	2025-06-29	42.1	163	135.4	29.7	male	Jennifer Jenson MD	Veronica Macias, RDMS	2025-06-07	2530	M	Y
2025-02-07	4862038	484572	1992-11-02 01:28:35	Follow up US	Finalized	Present	2025-02-18	92.1	337.6	353.6	73.2	male	William Wilson MD	Prithi Dokania, RDMS	2025-02-14	3800	M	Y
2025-02-07	4801587	704931	1990-01-30 19:03:16	Follow up US	Finalized	Present	2025-03-21	87.8	313.6	318.2	68.6	male	Robbie Robertson DO	Vicky Martinez, RDMS	2025-03-14	4070	M	Y
2025-02-07	4743226	759119	1994-08-15 17:03:45	Comp Detailed US	Finalized	Present	2025-07-05	43.8	164.8	137	29.1	male	Robbie Robertson DO	Prithi Dokania, RDMS	2025-06-22	2600	M	Y
2025-02-07	4772527	1371653	1993-02-17 02:09:22	Comp Detailed US	Finalized	Present	2025-06-29	50.9	174.7	151.6	32.3	male	Robbie Robertson DO	Deepa Yow, RDMS	2025-06-22	4150	M	Y
2025-02-08	4843284	23701	1985-08-17 22:45:28	Follow up US	Finalized	Present	2025-05-31	58.3	216.9	204.6	44.1		William Wilson MD	Vicky Martinez, RDMS	2025-05-22	2935	M	Y
2025-02-08	4948649	347364	1989-12-05 19:27:11	Follow up US	Finalized	Present	2025-03-02	96	344.8	353.2	68.5	male	William Wilson MD	Estefania Traun, RDMS	2025-02-17	4010	M	Y
2025-02-08	4898021	584186	1993-12-23 21:25:18	Comp Detailed US	Finalized	Present	2025-06-28	47.7	168.8	150.3	33.3	female	Jennifer Jenson MD	Vicky Martinez, RDMS	2025-06-14	3370	F	Y
2025-02-08	4755207	611367	1984-02-16 08:10:46	Comp Detailed US	Finalized	Present	2025-07-02	51.7	180.3	158.5	34.9	male	Jennifer Jenson MD	Natalie Serano, RDMS	2025-06-23	4280	M	Y
2025-02-08	4800418	1310295	1986-07-11 16:22:58	Follow up US	Finalized	Present	2025-04-29	72	260.2	237.9	54.5		William Wilson MD	Vicky Martinez, RDMS	2025-03-25	1770	F	Y
2025-02-08	4858626	1633941	1986-02-03 18:15:28	Follow up US	Finalized	Present	2025-03-07	92.2	329.4	321.4	70.4	female	William Wilson MD	Prithi Dokania, RDMS	2025-03-08	3520	F	Y
2025-02-08	4800875	1658307	1991-04-11 11:09:22	Follow up US	Finalized	Present	2025-03-04	84.8	317.2	299.6	67.1		Robbie Robertson DO	Veronica Macias, RDMS	2025-02-25	3020	M	Y
2025-02-09	4961093	487200	1996-08-01 03:07:01	Follow up US	Finalized	Present	2025-03-14	84.2	322	317	67.5		Jennifer Jenson MD	Natalie Serano, RDMS	2025-02-20	2790	F	Y
2025-02-09	4775031	576457	1993-04-26 01:28:35	Comp Detailed US	Finalized	Present	2025-07-08	44.6	160	135.6	25.8	male	Jennifer Jenson MD	Prithi Dokania, RDMS	2025-07-08	3410	M	Y
2025-02-09	4809941	1590132	1995-09-25 08:36:05	Follow up US	Finalized	Present	2025-03-09	93.7	311	333.5	70.4	female	William Wilson MD	Veronica Macias, RDMS	2025-02-27	3200	F	Y
2025-02-09	4882214	1599284	1988-01-04 08:34:41	Comp Detailed US	Finalized	Present	2025-07-03	41	156.5	123.3	30.3	male	Jennifer Jenson MD	Prithi Dokania, RDMS	2025-06-15	2115	M	Y
2025-02-10	4854399	91087	1999-12-18 07:42:39	Follow up US	Finalized	Present	2025-04-07	79.3	285.8	276.4	58.2	female	Jennifer Jenson MD	Vicky Martinez, RDMS	2025-04-09	4065	F	Y
2025-02-10	4820849	108049	1977-09-14 20:45:56	Comp Basic US	Finalized	Present	2025-03-17	91.3	320.6	319.6	68.3		Jennifer Jenson MD	Vicky Martinez, RDMS	2025-02-21	3090	F	Y
2025-02-10	4655466	394560	1990-06-04 18:52:01	Comp Detailed US	Finalized	Present	2025-07-04	41.3	164.2	150.9	31.5	female	Jennifer Jenson MD	Estefania Traun, RDMS	2025-06-26	3150	F	Y
2025-02-10	4874424	556379	1989-06-05 21:57:39	Follow up US	Finalized	Present	2025-02-27	95.6	335	353.2	69.8		Jennifer Jenson MD	Prithi Dokania, RDMS	2025-02-22	3980	M	Y
2025-02-10	4849349	1875884	1994-08-20 15:35:09	Follow up US	Finalized	Present	2025-04-05	85.4	296.4	320.4	62.7	male	Jennifer Jenson MD	Veronica Macias, RDMS	2025-04-01	4375	M	Y
2025-02-10	4855211	1992513	1994-03-31 17:54:22	Follow up US	Finalized	Present	2025-03-12	85.3	308.4	292.4	65.6	female	Jennifer Jenson MD	Estefania Traun, RDMS	2025-03-09	2580	F	Y
2025-02-11	4816003	135968	1993-11-26 21:23:54	Comp Detailed US	Finalized	Present	2025-07-02	46.4	181.5	145.2	29	male	Fred Fredriskson MD	Veronica Macias, RDMS	2025-07-06	3860	M	Y
2025-02-11	4805247	297111	1984-06-21 06:15:28	Comp Detailed US	Finalized	Present	2025-07-07	46.9	176.1	143.1	29.4	male	Fred Fredriskson MD	Estefania Traun, RDMS	2025-07-05	3540	M	Y
2025-02-11	4903634	733324	1990-04-10 19:34:13	Comp Detailed US	Finalized	Present	2025-07-12	38.5	157	127.9	26.8	female	Jennifer Jenson MD	Vicky Martinez, RDMS	2025-06-25	3500	F	Y
2025-02-11	4918228	916386	1986-03-24 18:46:24	Follow up US	Finalized	Present	2025-04-13	86	301.3	306.2	66.7		Jennifer Jenson MD	Apoorva Kota, RDMS	2025-04-02	3240	M	Y
2025-02-11	4634602	1484320	2000-05-17 06:36:33	Comp Detailed US	Finalized	Present	2025-07-01	53.9	190.4	160.2	30.8	male	Jennifer Jenson MD	Apoorva Kota, RDMS	2025-06-23	3810	M	Y
2025-02-12	4968537	409075	1991-05-10 10:51:05	Follow up US	Finalized	Present	2025-05-29	62.2	227.3	219.2	48.4		Jennifer Jenson MD	Juana Manadeva, RDMS	2025-02-25	1015	M	Y
2025-02-12	4885578	744789	1994-12-25 13:35:37	Follow up US	Finalized	Present	2025-04-15	85.8	324.8	294.1	62.4	female	Jennifer Jenson MD	Estefania Traun, RDMS	2025-04-10	4030	F	Y
2025-02-12	4754698	1162723	1992-06-16 06:32:20	Comp Detailed US	Finalized	Present	2025-07-01	47.7	169.9	154.3	32.6	female	William Wilson MD	Prithi Dokania, RDMS	2025-06-24	4170	F	Y
2025-02-12	4908581	1355798	1996-10-20 02:23:26	Comp Detailed US	Finalized	Present	2025-04-09	81.8	299	267.2	67.3	male	Jennifer Jenson MD	Natalie Serano, RDMS	2025-04-01	3230	M	Y
2025-02-12	4834274	1578359	1989-06-24 00:33:45	Comp Detailed US	Finalized	Present	2025-07-12	48.1	163.6	135.5	27.7	male	Jennifer Jenson MD	Prithi Dokania, RDMS	2025-06-22	2970	M	Y
2025-02-13	4910521	146785	1992-04-12 06:32:20	Comp Basic US	Finalized	Present	2025-04-26	72.3	273.3	252.7	54.9		Andrea Anderson MD	Angelica Zunj, RDMS	2025-04-20	3345	M	Y
2025-02-13	4941005	335056	1997-10-03 22:21:33	Follow up US	Finalized	Present	2025-06-14	53.9	210.5	186.1	40.1	male	William Wilson MD	Prithi Dokania, RDMS	2025-05-28	3430	M	Y
2025-02-13	4856944	354050	1986-03-20 17:20:37	Follow up US	Finalized	Present	2025-03-16	84.3	303.2	294.6	69.1		Fred Fredriskson MD	Veronica Macias, RDMS	2025-02-27	2380	F	Y
2025-02-13	4912408	463210	1983-04-14 12:43:35	Follow up US	Finalized	Present	2025-05-14	70.7	245.3	208.6	53.2		Jennifer Jenson MD	Veronica Macias, RDMS	2025-05-07	2480	F	Y
2025-02-13	4923833	475753	1989-04-08 01:28:35	Comp Detailed US	Finalized	Present	2025-07-13	41.7	158.4	128.1	26.9	female	Fred Fredriskson MD	Prithi Dokania, RDMS	2025-07-19	3580	F	Y
2025-02-13	4874783	765748	1995-07-26 10:24:22	Follow up US	Finalized	Present	2025-05-27	61.8	227.1	222.9	45		Fred Fredriskson MD	Veronica Macias, RDMS	2025-04-18	2830	F	Y
2025-02-13	4845925	839951	1984-06-19 05:13:35	Follow up US	Finalized	Present	2025-04-03	85.4	310.9	297.6	66.3		William Wilson MD	Vicky Martinez, RDMS	2025-03-30	3460	M	Y
2025-02-13	4619421	1051017	1986-11-09 16:15:56	Comp Detailed US	Finalized	Present	2025-07-15	40.7	154.8	141.6	26.2	male	Jennifer Jenson MD	Estefania Traun, RDMS	2025-06-24	2950	M	Y
2025-02-13	4903991	1275019	1987-12-15 09:02:48	Comp Detailed US	Finalized	Present	2025-07-08	42.7	162.1	146.8	31.3	female	Andrea Anderson MD	Vicky Martinez, RDMS	2025-07-03	3540	F	Y
2025-02-14	4878097	124785	1981-09-12 21:05:37	Follow up US	Finalized	Present	2025-03-25	83.2	316.7	305.8	64.3		Fred Fredriskson MD	Prithi Dokania, RDMS	2025-02-28	2900	M	Y
2025-02-14	4964819	217532	1988-05-22 05:17:48	Comp Basic US	Finalized	Present	2025-04-07	81	302.8	289.7	57.6	male	William Wilson MD	Natalie Serano, RDMS	2025-03-04	2200	M	Y
2025-02-14	4891953	257018	1991-12-02 09:22:30	Comp Detailed US	Finalized	Present	2025-07-06	51.2	175.7	139.9	28.3	male	William Wilson MD	Natalie Serano, RDMS	2025-07-01	3500	M	Y
2025-02-14	4984334	260622	1993-04-14 23:15:00	Comp Basic US	Finalized	Present	2025-03-11	89.2	342.4	337.3	67.3	female	Jennifer Jenson MD	Prithi Dokania, RDMS	2025-02-22	3200	F	Y
2025-02-14	4972661	579358	2004-04-16 05:40:18	Follow up US	Finalized	Present	2025-03-06	88.7	315.3	329.1	70.7	female	Jennifer Jenson MD	Apoorva Kota, RDMS	2025-02-21	2975	F	Y
2025-02-14	4837840	1200708	1989-11-01 20:24:50	Follow up US	Revised	Present	2025-04-21	76.6	279.5	255.2	59.5		William Wilson MD	Apoorva Kota, RDMS	2025-04-12	3095	F	Y
2025-02-15	4916690	182048	2009-05-25 22:27:11	Follow up US	Revised	Present	2025-04-16	79.2	282.8	258.3	57.3	female	Fred Fredriskson MD	Estefania Traun, RDMS	2025-03-09	2200	F	Y
2025-02-15	4904093	340441	1990-09-26 14:52:58	Follow up US	Finalized	Present	2025-05-07	71.7	266	250.2	51.5	male	Jennifer Jenson MD	Apoorva Kota, RDMS	2025-04-07	2435	M	Y
2025-02-15	4887871	615675	1987-08-04 09:36:33	Follow up US	Finalized	Present	2025-03-13	102.7	351	347.9	68.7		Fred Fredriskson MD	Angelica Zunj, RDMS	2025-03-06	4360	M	Y
2025-02-15	4944164	685612	1994-05-30 18:52:01	Comp Detailed US	Finalized	Present	2025-07-13	47	173.4	138.6	30.5	female	William Wilson MD	Prithi Dokania, RDMS	2025-07-07	3070	F	Y
2025-02-15	4951056	865737	1990-01-20 19:44:03	Follow up US	Finalized	Present	2025-04-30	78.5	297.2	264.4	57.8		Fred Fredriskson MD	Natalie Serano, RDMS	2025-04-11	3840	M	Y
[truncated: 926 more rows]
