# Supplementary material for: Quantitative Approach to Quality Review of Prenatal Ultrasound Examinations: Estimated Fetal Weight and Fetal Sex
Source: Preprints.org preprint supplement (doi:10.20944/preprints202410.1973.v1), 2024-10-25
Supplement: Supplementary file 5 [file supplementary]

**Supplementary File 2**  
**Exploration of factors potentially affecting accuracy of birth weight prediction**

The following analyses are generally restricted to the last ultrasound before birth because overall accuracy was higher for the last exam than for all exams combined. The exception is when one of the strata has  $N < 100$ . In such cases all ultrasound exams are analyzed to minimize spurious errors with small N.

- Page 2 – Maternal race
- Page 3 – Maternal obesity
- Page 4 – Maternal age
- Page 5 – Newborn sex
- Page 6 – Gestational age at time of ultrasound exam
- Page 7 – Gestational age at birth
- Page 8 – Birth weight
- Page 9 – Estimated fetal weight percentile

## S2.1 Maternal Race

Table S2.1 shows the accuracy of BW predictions stratified by maternal self-reported race as recorded in the hospital records. We analyzed all 1,938 exams rather than restricting to the last exam before birth because of the small number of Black patients.

Predicted BW was higher than actual BW for all races (positive mean error) but mean error was significantly lower for Hispanic patients than Asian or White patients. This difference did not persist when examining median absolute error, where the Kruskal-Wallis test showed no significant between-group difference ( $P = 0.13$ ). Black patients had a higher percentage of exams with errors greater than 30% compared to all other groups combined (8.3% vs 1.5%, odds ratio 6.1, 95% CI 1.4-27.3,  $P < 0.05$ ) based on an N of 2.

Table S2.1. Accuracy of birth weight predictions stratified by maternal race, all exams.

| Race     | N     | Percent Error, mean $\pm$ SD | Percent Absolute Error, Median (IQR) | Exams with Absolute Error less than 10%, n (%) | Exams with Absolute Error 10 to <20%, n (%) | Exams with Absolute Error 20 to <30%, n (%) | Exams with Absolute Error 30% or more, n (%) |
|----------|-------|------------------------------|--------------------------------------|------------------------------------------------|---------------------------------------------|---------------------------------------------|----------------------------------------------|
| Asian    | 589   | 4.4 $\pm$ 8.9 <sup>a</sup>   | 6.1 (2.9-10.8)                       | 423 (71.8%)                                    | 135 (22.9%)                                 | 29 (4.9%)                                   | 2 (0.3%)                                     |
| Black    | 24    | 7.2 $\pm$ 14.1 <sup>a</sup>  | 6.4 (2.3-14.5)                       | 17 (70.8%)                                     | 2 (8.3%)                                    | 3 (12.5%)                                   | 2 (8.3%)                                     |
| Hispanic | 258   | 2.0 $\pm$ 10.5 <sup>ab</sup> | 6.4 (3.4-11.5)                       | 179 (69.4%)                                    | 59 (22.9%)                                  | 15 (5.8%)                                   | 5 (1.9%)                                     |
| White    | 376   | 4.4 $\pm$ 9.0 <sup>a</sup>   | 6.4 (3.2-10.4)                       | 277 (73.7%)                                    | 80 (21.3%)                                  | 14 (3.7%)                                   | 5 (1.3%)                                     |
| Other    | 466   | 3.5 $\pm$ 12.6 <sup>a</sup>  | 7.6 (3.5-12.8)                       | 143 (63.6%)                                    | 59 (26.2%)                                  | 15 (6.7%)                                   | 8 (3.6%)                                     |
| Declined | 225   | 3.1 $\pm$ 9.2 <sup>a</sup>   | 6.3 (3.0-10.6)                       | 347 (74.5%)                                    | 100 (21.5%)                                 | 13 (2.8%)                                   | 6 (1.3%)                                     |
| Total    | 1,938 | 3.7 $\pm$ 9.9 <sup>a</sup>   | 6.4 (3.1-11.0) <sup>c</sup>          | 1386 (71.5%)                                   | 435 (22.5%)                                 | 89 (4.6%)                                   | 28 (1.4%)                                    |

"Declined" group includes patients where the race field was recorded as "Declined to State" or was left blank.

a- Significantly different than 0,  $P < 0.01$ , t-test

b- Significantly different than Asian or White,  $P < 0.05$ , ANOVA with Sidak test

c- No significant between-group difference,  $P=0.13$ , Kruskal-Wallis test.

## S2.2 Maternal obesity

As shown in Table S2.2, maternal obesity had no significant association with accuracy. We analyzed all 1,938 exams rather than restricting to the last exam before birth because of the small number of obese patients. Obesity was defined based on the indications for the exam as selected by the sonographer, not measurement of height and weight. Because only 6.5% of exams were recorded as Obese, compared to 27.7% of the California population in 2023\*, we suspect that obesity was underdiagnosed.

Table S2.2. Accuracy of birth weight predictions in obese and non-obese patients, all exams

| Obesity   | N     | Percent Error, mean $\pm$ SD | Percent Absolute Error, Median (IQR) | Exams with Absolute Error less than 10%, n (%) | Exams with Absolute Error 10 to <20%, n (%) | Exams with Absolute Error 20 to <30%, n (%) | Exams with Absolute Error 30% or more, n (%) |
|-----------|-------|------------------------------|--------------------------------------|------------------------------------------------|---------------------------------------------|---------------------------------------------|----------------------------------------------|
| Non-obese | 1812  | 3.8 $\pm$ 9.9 <sup>a</sup>   | 6.4 (3.0-11.1)                       | 1,292 (71.3%)                                  | 408 (22.55)                                 | 85 (4.7%)                                   | 27 (1.5%)                                    |
| Obese     | 126   | 2.4 $\pm$ 9.5 <sup>a</sup>   | 6.4 (3.9-10.0)                       | 94 (74.6%)                                     | 27 (21.4%)                                  | 4 (3.2%)                                    | 1 (0.8%)                                     |
| Total     | 1,938 | 3.7 $\pm$ 9.9 <sup>a</sup>   | 6.4 (3.1-11.0) <sup>c</sup>          | 1,386 (71.5%)                                  | 435 (22.5%)                                 | 89 (4.6%)                                   | 28 (1.4%)                                    |

a- Significantly different than 0, P < 0.01, t-test

b- No significant between-group difference, P=0.56, ANOVA

c- No significant between-group difference, P=0.88, Kruskal-Wallis test.

\* Centers for Disease Control and Prevention. Adult obesity prevalence maps, 2023. Available at: <https://www.cdc.gov/obesity/php/data-research/adult-obesity-prevalence-maps.html>, accessed 24 September 2024.

### S2.3 Maternal Age

For this analysis, maternal age strata were defined to divide the sample roughly into quartiles. As shown in Table S2.3, predicted BW was higher than BW (positive mean error) in all age strata except ages 15-29 years. There was no significant between-group difference in absolute error ( $P = 0.25$ ).

Table S2.3. Accuracy of birth weight predictions stratified by maternal age, last exam before birth

| Maternal Age, years | N   | Percent Error, mean $\pm$ SD | Percent Absolute Error, Median (IQR) | Exams with Absolute Error less than 10%, n (%) | Exams with Absolute Error 10 to <20%, n (%) | Exams with Absolute Error 20 to <30%, n (%) | Exams with Absolute Error 30% or more, n (%) |
|---------------------|-----|------------------------------|--------------------------------------|------------------------------------------------|---------------------------------------------|---------------------------------------------|----------------------------------------------|
| 15-29.99            | 202 | 0.7 $\pm$ 9.3                | 6.2 (3.1-10.8)                       | 149 (73.7%)                                    | 46 (22.8%)                                  | 7 (3.5%)                                    | 0                                            |
| 30-34.99            | 321 | 3.2 $\pm$ 8.1 <sup>ab</sup>  | 5.7 (2.8-9.6)                        | 246 (76.6%)                                    | 61 (21.5%)                                  | 5 (1.6%)                                    | 1 (0.3%)                                     |
| 35-37.99            | 194 | 3.1 $\pm$ 8.7 <sup>ab</sup>  | 7.1 (3.6-9.9)                        | 148 (76.3%)                                    | 41 (21.3%)                                  | 5 (2.6%)                                    | 0                                            |
| $\geq 38$           | 173 | 4.0 $\pm$ 8.1 <sup>ab</sup>  | 5.7 (2.6-10.0)                       | 131 (75.7%)                                    | 35 (20.2%)                                  | 6 (3.5%)                                    | 1 (0.6%)                                     |
| Total               | 890 | 2.8 $\pm$ 8.6 <sup>a</sup>   | 5.8 (3.0-9.9) <sup>d</sup>           | 674 (75.7%)                                    | 191 (21.5%)                                 | 23 (2.6%)                                   | 2 (0.2%)                                     |

a- Significantly different than 0,  $P < 0.001$ , t-test

b- Significantly different than 15-29 yr group,  $P < 0.05$ , ANOVA with Sidak test

c- No significant between-group difference,  $P=0.25$ , Kruskal-Wallis test.

## S2.4 Newborn Sex

As shown in Table S2.4, predicted BW was higher than BW (positive mean error) for both females and males, but significantly less so for males. There was no significant between-group difference in absolute error ( $P = 0.53$ ).

Table S2.4. Accuracy of birth weight predictions in males vs females, last exam before birth

| Newborn Sex | N   | Percent Error, mean $\pm$ SD | Percent Absolute Error, Median (IQR) | Exams with Absolute Error less than 10%, n (%) | Exams with Absolute Error 10 to <20%, n (%) | Exams with Absolute Error 20 to <30%, n (%) | Exams with Absolute Error 30% or more, n (%) |
|-------------|-----|------------------------------|--------------------------------------|------------------------------------------------|---------------------------------------------|---------------------------------------------|----------------------------------------------|
| Female      | 493 | 3.6 $\pm$ 8.7 <sup>a</sup>   | 5.8 (3.0-10.5)                       | 323 (73.6%)                                    | 102 (23.2%)                                 | 12 (2.7%)                                   | 2 (0.5%)                                     |
| Male        | 451 | 1.9 $\pm$ 8.4 <sup>ab</sup>  | 6.0 (3.0-9.4)                        | 351 (77.8%)                                    | 89 (19.7%)                                  | 11 (2.4%)                                   | 0                                            |
| Total       | 890 | 2.8 $\pm$ 8.6 <sup>a</sup>   | 5.8 (3.0-9.9) <sup>d</sup>           | 674 (75.7%)                                    | 191 (21.5%)                                 | 23 (2.6%)                                   | 2 (0.2%)                                     |

a- Significantly different than 0,  $P < 0.001$ , t-test

b- Significantly different than Females,  $P < 0.005$ , ANOVA

c- No significant between-group difference,  $P = 0.53$ , Kruskal-Wallis test.

## S2.5 Gestational Age at time of Ultrasound Exam

For this analysis, gestational age strata were defined to divide the sample roughly into quartiles. As shown in Table S2.5, when considering all ultrasound exams, those performed before 30 weeks of gestation had larger mean error and median absolute errors than later exams. However, these differences did not persist when the analysis included only the last exam before birth.

Table S2.5. Accuracy of birth weight predictions stratified by gestational age at ultrasound exam, last exam before birth.

| Gestational Age, weeks | N     | Percent Error, mean $\pm$ SD | Percent Absolute Error, Median (IQR) | Exams with Absolute Error less than 10%, n (%) | Exams with Absolute Error 10 to <20%, n (%) | Exams with Absolute Error 20 to <30%, n (%) | Exams with Absolute Error 30% or more, n (%) |
|------------------------|-------|------------------------------|--------------------------------------|------------------------------------------------|---------------------------------------------|---------------------------------------------|----------------------------------------------|
| All Exams              |       |                              |                                      |                                                |                                             |                                             |                                              |
| 18-29.9                | 415   | 5.4 $\pm$ 12.6 <sup>ab</sup> | 7.7 (3.5-13.2) <sup>c</sup>          | 256 (61.7%)                                    | 101 (24.3%)                                 | 41 (9.9%)                                   | 17 (4.1%)                                    |
| 30-32.9                | 601   | 3.4 $\pm$ 9.3 <sup>a</sup>   | 6.2 (3.1-10.9)                       | 434 (72.2%)                                    | 137 (22.8%)                                 | 26 (4.3%)                                   | 4 (0.7%)                                     |
| 33-35.9                | 433   | 3.2 $\pm$ 9.2 <sup>a</sup>   | 5.9 (2.6-10.8)                       | 313 (72.3%)                                    | 101 (23.3%)                                 | 14 (3.2%)                                   | 5 (1.2%)                                     |
| $\geq 36$              | 489   | 3.0 $\pm$ 8.2 <sup>a</sup>   | 6.0 (3.0-9.6)                        | 383 (78.3%)                                    | 96 (19.6%)                                  | 8 (1.6%)                                    | 2 (0.4%)                                     |
| Total                  | 1,938 | 3.7 $\pm$ 9.9 <sup>a</sup>   | 6.4 (3.1-11.0)                       | 1,386 (71.5%)                                  | 435 (22.5%)                                 | 89 (4.6%)                                   | 28 (1.4%)                                    |
| Last Exam Before Birth |       |                              |                                      |                                                |                                             |                                             |                                              |
| 18-29.9                | 48    | 1.8 $\pm$ 9.8                | 6.4 (3.0-10.3)                       | 34 (70.8%)                                     | 11 (22.9%)                                  | 3 (6.3%)                                    | 0                                            |
| 30-32.9                | 140   | 2.0 $\pm$ 8.5 <sup>a</sup>   | 5.5 (2.9-9.2)                        | 107 (76.4%)                                    | 30 (21.4%)                                  | 3 (2.1%)                                    | 0                                            |
| 33-35.9                | 237   | 2.9 $\pm$ 9.1 <sup>a</sup>   | 5.9 (2.9-11.3)                       | 170 (71.7%)                                    | 58 (24.5%)                                  | 9 (3.8%)                                    | 0                                            |
| $\geq 36$              | 465   | 3.0 $\pm$ 8.2 <sup>a</sup>   | 6.0 (3.0-9.5)                        | 363 (78.1%)                                    | 92 (19.8%)                                  | 8 (1.7%)                                    | 2 (0.4%)                                     |
| Total                  | 890   | 2.8 $\pm$ 8.6 <sup>ad</sup>  | 5.8 (3.0-9.9) <sup>e</sup>           | 674 (75.7%)                                    | 191 (21.5%)                                 | 23 (2.6%)                                   | 2 (0.2%)                                     |

a- Significantly different than 0,  $P < 0.01$ , t-test

b- Significantly different than all other groups,  $P < 0.05$ , ANOVA with Sidak test

c- Significantly different than all other groups,  $P < 0.001$ , Kruskal-Wallis and U-test

d- No significant between-group difference,  $P=0.50$ , ANOVA

e- No significant between-group difference,  $P=0.67$ , Kruskal-Wallis test

## S2.6 Gestational Age at Birth

For this analysis, gestational age strata were defined to divide the sample roughly into quintiles. As shown in Table S2.6, predicted BW was higher than BW (positive mean error) in all gestational age strata except  $\leq 36$  completed weeks. There was no significant between-group difference in mean error or median absolute error.

Table S2.6. Accuracy of birth weight predictions stratified by gestational age at birth, last exam before birth

| Gestational Age, completed weeks | N   | Percent Error, mean $\pm$ SD | Percent Absolute Error, Median (IQR) | Exams with Absolute Error less than 10%, n (%) | Exams with Absolute Error 10 to <20%, n (%) | Exams with Absolute Error 20 to <30%, n (%) | Exams with Absolute Error 30% or more, n (%) |
|----------------------------------|-----|------------------------------|--------------------------------------|------------------------------------------------|---------------------------------------------|---------------------------------------------|----------------------------------------------|
| $\leq 36$                        | 173 | 1.1 $\pm$ 9.3                | 5.7 (2.9-10.6)                       | 124 (71.7%)                                    | 42 (24.3%)                                  | 7 (4.1%)                                    | 0                                            |
| 37                               | 144 | 3.5 $\pm$ 8.6 <sup>a</sup>   | 6.6 (3.0-10.0)                       | 108 (75.0%)                                    | 30 (20.8%)                                  | 6 (4.2%)                                    | 0                                            |
| 38                               | 172 | 3.2 $\pm$ 8.2 <sup>a</sup>   | 6.7 (3.4-9.5)                        | 131 (76.2%)                                    | 38 (22.1%)                                  | 3 (1.7%)                                    | 0                                            |
| 39                               | 293 | 3.1 $\pm$ 8.4 <sup>a</sup>   | 5.8 (2.9-9.5)                        | 228 (77.8%)                                    | 59 (20.1%)                                  | 4 (1.4%)                                    | 2 (0.7%)                                     |
| $\geq 40$                        | 108 | 2.8 $\pm$ 8.4 <sup>a</sup>   | 5.2 (2.7-5.0)                        | 83 (76.9%)                                     | 22 (20.4%)                                  | 3 (2.8%)                                    | 0                                            |
| Total                            | 890 | 2.8 $\pm$ 8.6 <sup>ab</sup>  | 5.8 (3.0-9.9) <sup>c</sup>           | 674 (75.7%)                                    | 191 (21.5%)                                 | 23 (2.6%)                                   | 2 (0.2%)                                     |

a- Significantly different than 0,  $P < 0.01$ , t-test

b- No significant between-group difference,  $P=0.07$ , ANOVA

c- No significant between-group difference,  $P=0.62$ , Kruskal-Wallis test

## S2.7 Birth Weight

For this analysis, birth weight strata were defined to divide the sample roughly into quartiles. As shown in Table S2.7, mean predicted BW was significantly higher than BW (positive mean error) in all strata except BW  $\geq 3500$  gm where mean predicted BW was significantly lower than BW. Median absolute error was significantly higher among those with BW  $< 3200$  gm compared to those with BW  $\geq 3200$  gm.

Table S2.7. Accuracy of birth weight predictions stratified by birth weight, last exam before birth

| Birth Weight, grams | N   | Percent Error, mean $\pm$ SD | Percent Absolute Error, Median (IQR) | Exams with Absolute Error less than 10%, n (%) | Exams with Absolute Error 10 to $< 20\%$ , n (%) | Exams with Absolute Error 20 to $< 30\%$ , n (%) | Exams with Absolute Error 30% or more, n (%) |
|---------------------|-----|------------------------------|--------------------------------------|------------------------------------------------|--------------------------------------------------|--------------------------------------------------|----------------------------------------------|
| $< 2800$            | 241 | $4.5 \pm 9.8^{abc}$          | $7.0 (3.4-12.2)^d$                   | 159 (66.0%)                                    | 68 (28.2%)                                       | 12 (5.0%)                                        | 2 (0.8%)                                     |
| 2800-3199           | 241 | $5.0 \pm 7.8^{abc}$          | $6.8 (3.3-10.9)^d$                   | 178 (73.9%)                                    | 57 (23.7%)                                       | 6 (2.5%)                                         | 0                                            |
| 3200-3499           | 199 | $2.4 \pm 6.9^{ab}$           | $4.8 (2.3-8.2)$                      | 170 (85.3%)                                    | 26 (13.1%)                                       | 3 (1.5%)                                         | 0                                            |
| $\geq 3500$         | 209 | $-1.5 \pm 7.8^{ac}$          | $5.1 (2.6-9.2)$                      | 167 (79.9%)                                    | 40 (19.1%)                                       | 2 (1.0%)                                         | 0                                            |
| Total               | 890 | $2.8 \pm 8.6^{ab}$           | $5.8 (3.0-9.9)$                      | 674 (75.7%)                                    | 191 (21.5%)                                      | 23 (2.6%)                                        | 2 (0.2%)                                     |

a- Significantly different than 0,  $P < 0.01$ , t-test

b- Significantly different than  $\geq 3500$  gm group,  $P < 0.001$ , ANOVA with Sidak test

c- Significantly different than 3200-3400 gm group,  $P < 0.05$ , ANOVA with Sidak test

d- Significantly different than both groups  $\geq 3200$  gm,  $P < 0.001$ , Kruskal-Wallace and U tests



## S2.8 Fetal Weight Percentile

For this analysis, strata were defined by typical clinical groupings, i.e small fetus defined by EFW <10<sup>th</sup> percentile and large fetus defined by EFW >90<sup>th</sup> percentile. As shown in Table S2.8, mean error and median absolute error increased progressively as EFW percentile increased when analyzing all exams. When the analysis was restricted to the last exam before birth, the increase in mean error remained significant but the increase in median absolute error did not.

Table S2.8. Accuracy of birth weight predictions stratified by fetal weight percentile, last exam before birth

| Fetal Weight Percentile            | N     | Percent Error, mean $\pm$ SD | Percent Absolute Error, Median (IQR) | Exams with Absolute Error less than 10%, n (%) | Exams with Absolute Error 10 to <20%, n (%) | Exams with Absolute Error 20 to <30%, n (%) | Exams with Absolute Error 30% or more, n (%) |
|------------------------------------|-------|------------------------------|--------------------------------------|------------------------------------------------|---------------------------------------------|---------------------------------------------|----------------------------------------------|
| All Exams                          |       |                              |                                      |                                                |                                             |                                             |                                              |
| < 10 <sup>th</sup>                 | 213   | 0.3 $\pm$ 9.7                | 6.1 (3.3-9.8)                        | 162 (76.1%)                                    | 38 (17.8%)                                  | 11 (5.2%)                                   | 2 (0.9%)                                     |
| 10 <sup>th</sup> -49 <sup>th</sup> | 942   | 2.9 $\pm$ 9.8 <sup>ab</sup>  | 6.3 (2.9-10.6)                       | 691 (73.4%)                                    | 203 (21.6%)                                 | 33 (3.5%)                                   | 15 (1.6%)                                    |
| 50 <sup>th</sup> -90 <sup>th</sup> | 661   | 5.0 $\pm$ 9.6 <sup>abc</sup> | 6.5 (3.0-11.3)                       | 452 (68.4%)                                    | 168 (25.4%)                                 | 32 (4.8%)                                   | 9 (1.4%)                                     |
| >90 <sup>th</sup>                  | 122   | 7.9 $\pm$ 9.5 <sup>abc</sup> | 7.7 (3.6-13.6) <sup>d</sup>          | 81 (66.4%)                                     | 26 (21.3%)                                  | 13 (10.7%)                                  | 2 (1.6%)                                     |
| Total                              | 1,938 | 3.7 $\pm$ 9.9 <sup>a</sup>   | 6.4 (3.1-11.0)                       | 1,386 (71.5%)                                  | 435 (22.5%)                                 | 89 (4.6%)                                   | 28 (1.4%)                                    |
| Last Exam Before Birth             |       |                              |                                      |                                                |                                             |                                             |                                              |
| < 10 <sup>th</sup>                 | 104   | -0.6 $\pm$ 8.3               | 5.4 (3.2-8.1)                        | 94 (80.8%)                                     | 16 (15.4%)                                  | 4 (3.9%)                                    | 0                                            |
| 10 <sup>th</sup> -49 <sup>th</sup> | 444   | 2.5 $\pm$ 8.8 <sup>ab</sup>  | 5.9 (2.9-9.6)                        | 339 (76.4%)                                    | 94 (21.2%)                                  | 9 (2.0%)                                    | 2 (0.5%)                                     |
| 50 <sup>th</sup> -90 <sup>th</sup> | 293   | 3.8 $\pm$ 8.3 <sup>ab</sup>  | 6.0 (2.9-10.6)                       | 214 (73.0%)                                    | 80 (23.9%)                                  | 9 (3.1%)                                    | 0                                            |
| >90 <sup>th</sup>                  | 49    | 6.5 $\pm$ 6.9 <sup>abc</sup> | 6.0 (4.7-9.8)                        | 37 (75.7%)                                     | 11 (22.5%)                                  | 1 (2.0%)                                    | 0                                            |
| Total                              | 890   | 2.8 $\pm$ 8.6 <sup>ab</sup>  | 5.8 (3.0-9.9) <sup>e</sup>           | 674 (75.7%)                                    | 191 (21.5%)                                 | 23 (2.6%)                                   | 2 (0.2%)                                     |

<sup>a</sup> Significantly different than 0, P < 0.01, t-test

<sup>b</sup> Significantly different than <10<sup>th</sup> percentile group, P<0.01, ANOVA with Sidak test

<sup>c</sup> Significantly different than 10<sup>th</sup> to 49<sup>th</sup> percentile group, P<0.05, ANOVA with Sidak test

<sup>d</sup> Significantly different than both groups <50<sup>th</sup> percentile, P<0.01, Kruskal-Wallis with U test

<sup>e</sup> No significant difference between groups, P=0.55, Kruskal-Wallis test
